# Supplementary material for: Prenatal delta-9-tetrahydrocannabinol exposure is associated with changes in rhesus macaque DNA methylation enriched for autism genes
Source: Clin Epigenetics. 2023 Jul 6;15:104. doi: 10.1186/s13148-023-01519-4 (PMC10324248; doi:10.1186/s13148-023-01519-4)
Supplement: Supplementary file 2 — Additional file 2. Table S1. DMCs associated with prenatal THC exposure at FDR significance in one or more tissues; Table S2. DMRs associated with prenatal THC exposure at FDR significance in placenta; Table S3. MissMethyl FDR significant GO and KEGG Terms; Table S4. Summary of SFARI genes which overlap with THC DMC genes; Table S5. Significant eQTM for placental differentially expressed genes sorted by genomic coordinates using EPIC annotation; Table S6. Placental eQTM gene FDR significant GO Terms from STRINGdb [file 13148_2023_1519_MOESM2_ESM.xlsx]

## Sheet: Table S1
DMCs associated with prenatal THC exposure at FDR significance in one or more tissues.
EPIC annotation (hg19)					Rhesus (Mmul_10)		Placenta			Cerebellum			PFC			Heart (Right Ventricle)			Lung
probe	CHR	MAPINFO	gene	nearest genes	CHR	MAPINFO	logFC	P.Value	adjusted P.Value	logFC	P.Value	adjusted P.Value	logFC	P.Value	adjusted P.Value	logFC	P.Value	adjusted P.Value	logFC	P.Value	adjusted P.Value
cg23018092	5	126626364	MEGF10	MEGF10	6	124772737	6.38175	2.06353e-16	4.84592e-11	0.467175	0.361436	0.999996	-0.215668	0.657008	0.999987	0.0873503	0.863842	0.999999	-0.924523	0.0621453	0.999998
cg00617180	6	44642051		SUPT3H	4	124660978	-0.710055	0.00128489	0.144749	-1.7507	4.4878e-10	0.00010539	-2.03551	1.86593e-12	4.38187e-07	-1.23212	1.09764e-06	0.0859219	-1.48375	7.88684e-09	0.00185211
cg05494467	5	140892308	PCDHGB5	PCDHGA8	6	138890510	-3.8072	5.40364e-10	5.98857e-05	0.199257	0.689943	0.999996	0.147454	0.756519	0.999987	0.284913	0.568783	0.999999	-0.0264312	0.955653	0.999998
cg27346707	5	126626348	MEGF10	MEGF10	6	124772721	2.74027	7.65032e-10	5.98857e-05	-0.0941028	0.796139	0.999996	-0.164725	0.635276	0.999987	0.0863834	0.812525	0.999999	-0.0333498	0.923397	0.999998
cg20825437	2	45879512	PRKCE	PRKCE	13	63151971	-1.2957	1.45434e-09	8.53827e-05	-0.0283721	0.87241	0.999996	-0.214549	0.206691	0.999987	-0.21868	0.219973	0.999999	-0.0023917	0.988658	0.999998
cg19948549	4	4420530	D4S234E	NSG1	5	8503869	-0.234298	0.172165	0.851061	-1.39434	9.65407e-10	0.000113356	-0.0700103	0.680161	0.999987	0.425969	0.0206979	0.999999	0.0694647	0.682512	0.999998
cg15551993	13	75683313		CTAGE11P	17	56889304	1.55372	4.85643e-09	0.000200448	-0.0547387	0.805818	0.999996	0.0880932	0.678104	0.999987	0.232937	0.298553	0.999999	0.0156544	0.941144	0.999998
cg03721362	5	126626298	MEGF10	MEGF10	6	124772671	3.468	5.1214e-09	0.000200448	-0.0821692	0.868953	0.999996	0.0298437	0.949831	0.999987	0.0360662	0.942262	0.999999	-0.428946	0.368187	0.999998
cg06990080	2	207802453		CPO	12	94360248	-1.03134	9.23125e-09	0.00030969	0.150764	0.323656	0.999996	0.0940342	0.516669	0.999987	0.0768421	0.613364	0.999999	0.0222767	0.877608	0.999998
cg13688098	4	57181855	KIAA1211	KIAA1211	5	77286584	1.2	1.10937e-08	0.000325651	0.0500269	0.778872	0.999996	-0.0290201	0.864181	0.999987	0.0943187	0.596988	0.999999	-0.107795	0.526128	0.999998
cg17178218	1	7352249	CAMTA1	CAMTA1	1	217212748	1.27756	1.3321e-08	0.000347584	0.166476	0.385873	0.999996	0.0315272	0.862518	0.999987	-0.158822	0.407899	0.999999	0.0407994	0.822702	0.999998
cg09558509	17	27939837	ANKRD13B	ANKRD13B	16	25267808	2.48876	1.57795e-08	0.00037056	0.399361	0.290266	0.999996	0.168209	0.638193	0.999987	0.0701947	0.851562	0.999999	0.0961267	0.787955	0.999998
cg17663727	6	1478000		FOXF2	4	168618333	0.890976	1.80644e-08	0.000385653	0.0908972	0.502141	0.999996	0.106447	0.409967	0.999987	-0.161623	0.235508	0.999999	0.135416	0.295786	0.999998
cg19226007	17	43045068	C1QL1	C1QL1	16	56232901	-3.63546	2.22419e-08	0.000435267	-0.0519321	0.925615	0.999996	0.275279	0.603947	0.999987	-0.13613	0.806723	0.999999	0.143796	0.786165	0.999998
cg20169867	7	14942590		DGKB	3	100093285	1.90464	2.4398e-08	0.000438535	0.0631775	0.829103	0.999996	-0.109973	0.693433	0.999987	-0.248408	0.397983	0.999999	0.0826247	0.767006	0.999998
cg27539214	16	67997921	SLC12A4	SLC12A4	20	55182930	-1.3153	2.77501e-08	0.000438535	-0.100975	0.619826	0.999996	-0.00851157	0.96493	0.999987	0.12613	0.53581	0.999999	0.00354594	0.985386	0.999998
cg06940792	5	126626557	MEGF10	MEGF10	6	124772932	1.50194	2.80112e-08	0.000438535	-0.244645	0.295258	0.999996	-0.260616	0.242559	0.999987	0.190409	0.414056	0.999999	0.0532673	0.809721	0.999998
cg13015925	3	147125114	ZIC4	ZIC4	2	49540208	1.06809	3.53669e-08	0.000519089	-0.171732	0.306467	0.999996	0.248353	0.123564	0.999987	-0.0875112	0.600548	0.999999	-0.0533991	0.737046	0.999998
cg03918304	2	176981654	HOXD10	HOXD10	12	63231227	1.59628	6.1584e-08	0.000819645	-0.38633	0.136259	0.999996	0.139522	0.567641	0.999987	-0.159268	0.534462	0.999999	-0.230547	0.346628	0.999998
cg05521089	10	65733092		REEP3	9	73972364	0.858049	6.28252e-08	0.000819645	0.0561873	0.683365	0.999996	0.0415844	0.751208	0.999987	0.0474106	0.730647	0.999999	-0.0849091	0.518214	0.999998
cg22496475	5	128795842	ADAMTS19-AS1	ADAMTS19	6	126927832	-2.80952	7.07761e-08	0.000874777	0.0830552	0.854589	0.999996	0.355772	0.411687	0.999987	0.193991	0.668898	0.999999	-0.069672	0.871773	0.999998
cg12967319	14	101291997	MEG3	MEG3	7	163044381	1.43836	8.69812e-08	0.00102132	-0.160993	0.493109	0.999996	-0.00747838	0.97326	0.999987	-0.0295815	0.899506	0.999999	-0.0403028	0.856671	0.999998
cg06844984	16	7568053	A2BP1	RBFOX1	20	7608407	0.960489	1.08546e-07	0.00121383	0.313663	0.0525134	0.999996	0.00805386	0.957336	0.999987	-0.00213048	0.989245	0.999999	0.191342	0.208164	0.999998
cg04891961	17	27939900	ANKRD13B	ANKRD13B	16	25267872	2.25442	1.27252e-07	0.00135834	0.373765	0.320297	0.999996	0.105499	0.767119	0.999987	-0.0653977	0.861141	0.999999	0.0747739	0.833704	0.999998
cg05434312	21	39287834	KCNJ6	KCNJ6	3	8706975	-1.46507	1.42912e-07	0.00145917	-0.0503748	0.836661	0.999996	-0.110555	0.635153	0.999987	0.31359	0.203718	0.999999	-0.145111	0.533828	0.999998
cg08857221	1	37941361	ZC3H12A	ZC3H12A	1	187114686	1.15	1.59135e-07	0.0015571	0.144985	0.453478	0.999996	-0.0398693	0.828128	0.999987	-0.0987242	0.609079	0.999999	-0.0844234	0.646052	0.999998
cg02305687	5	33937182	RXFP3	RXFP3	6	34068224	2.15359	1.70181e-07	0.00159858	0.0105706	0.976713	0.999996	0.123622	0.720253	0.999987	-0.0565258	0.875975	0.999999	-0.0389882	0.910011	0.999998
cg06065125	4	85402870		NKX6-1	5	49164874	-1.77887	2.15113e-07	0.00194294	0.132288	0.66231	0.999996	-0.376683	0.195782	0.999987	-0.0172208	0.954611	0.999999	0.0485773	0.866164	0.999998
cg00046499	3	154146183	GPR149	GPR149	2	56712772	1.59337	2.47074e-07	0.00214895	-0.363764	0.187188	0.999996	0.175292	0.501213	0.999987	-0.219314	0.42336	0.999999	0.273471	0.295951	0.999998
cg16789129	8	119916509		TNFRSF11B	8	119191277	0.705178	2.90022e-07	0.00225611	-0.0362701	0.765848	0.999996	0.105898	0.363493	0.999987	0.0266592	0.826688	0.999999	0.0243801	0.833497	0.999998
cg03838327	9	124991656	LHX6	LHX6	15	20481278	-0.96646	2.97823e-07	0.00225611	0.0652155	0.696505	0.999996	0.0129539	0.935116	0.999987	0.0535742	0.748577	0.999999	-0.0126293	0.936738	0.999998
cg18232816	12	33591505	SYT10	SYT10	11	34661200	-1.28231	2.86566e-07	0.00225611	0.0879971	0.691064	0.999996	-0.0713812	0.734963	0.999987	-0.124516	0.574258	0.999999	-0.00977403	0.963002	0.999998
cg17534110	14	71132913	TTC9	TTC9	7	132779673	0.881116	2.86215e-07	0.00225611	-0.174443	0.254878	0.999996	-0.111089	0.44453	0.999987	-0.105253	0.489901	0.999999	-0.0444922	0.758736	0.999998
cg11973286	12	99640309	ANKS1B	ANKS1B	11	99029544	1.02594	3.13012e-07	0.00229708	-0.13294	0.456098	0.999996	-0.107783	0.525448	0.999987	0.0942243	0.596711	0.999999	-0.261612	0.127743	0.999998
cg12340868	10	88854252	FAM35A	GLUD1	12	84723418	0.66443	3.45839e-07	0.00244737	0.141512	0.225502	0.999996	0.00299187	0.978343	0.999987	0.0296204	0.798029	0.999999	0.0718626	0.515461	0.999998
cg09070195	11	121526797		SORL1	14	114698622	-1.32288	3.54335e-07	0.00244737	-0.0501404	0.827954	0.999996	-0.0372643	0.865334	0.999987	0.0507688	0.825833	0.999999	0.0723532	0.742069	0.999998
cg11689439	12	105593962	APPL2	APPL2	11	104945704	-1.07346	4.25429e-07	0.00285446	-0.0955813	0.613419	0.999996	-0.217758	0.23031	0.999987	-0.184276	0.332098	0.999999	-0.0153744	0.931909	0.999998
cg07092985	8	55533887	RP1	RP1	8	55229745	1.13215	4.73854e-07	0.00309106	0.0472001	0.813791	0.999996	0.148043	0.439516	0.999987	0.0447119	0.823434	0.999999	-0.0694286	0.716184	0.999998
cg03047420	1	29510950		SRSF4	1	195498472	-0.851863	5.5024e-07	0.00317089	0.109855	0.470941	0.999996	-0.198326	0.175298	0.999987	-0.147942	0.332844	0.999999	-0.18338	0.209385	0.999998
cg19872095	1	37941263	ZC3H12A	ZC3H12A	1	187114784	1.11319	5.23499e-07	0.00317089	0.0172936	0.930396	0.999996	0.0885157	0.639246	0.999987	0.142873	0.471914	0.999999	-0.0934193	0.62085	0.999998
cg26760642	11	20552749		PRMT3	14	45034263	1.01096	5.67109e-07	0.00317089	-0.251011	0.169363	0.999996	0.291023	0.0961827	0.999987	0.295725	0.106973	0.999999	0.11307	0.511966	0.999998
cg23682432	12	113246173	RPH3A	RPH3A	11	112524787	1.42163	5.27869e-07	0.00317089	0.0336208	0.894268	0.999996	-0.0388566	0.871895	0.999987	0.134072	0.596705	0.999999	-0.0427311	0.859253	0.999998
cg26171489	15	92459303	SLCO3A1	SLCO3A1	7	70978507	1.76308	5.34906e-07	0.00317089	0.153289	0.625822	0.999996	-0.115163	0.700377	0.999987	-0.216044	0.492552	0.999999	-0.0314406	0.916261	0.999998
cg03140788	16	20359971	UMOD	UMOD	20	19194121	1.40475	5.6372e-07	0.00317089	0.235501	0.350286	0.999996	0.0222738	0.925713	0.999987	-0.186069	0.459626	0.999999	0.0601433	0.801289	0.999998
cg13548314	8	6420841	ANGPT2	MCPH1	8	7301112	-1.07461	5.99783e-07	0.0032756	0.0269875	0.888497	0.999996	-0.00880307	0.961701	0.999987	-0.0836538	0.664178	0.999999	-0.0187473	0.918552	0.999998
cg05323533	4	41750362	PHOX2B	PHOX2B	5	40918155	-1.06535	6.19891e-07	0.00330847	-0.000278133	0.998839	0.999996	0.103501	0.570441	0.999987	0.144976	0.449728	0.999999	0.241959	0.18852	0.999998
cg15920743	10	102984393		LBX1	9	101705553	-0.962185	6.98316e-07	0.003565	0.140018	0.422011	0.999996	-0.0153819	0.925929	0.999987	0.0780092	0.653743	0.999999	-0.0109602	0.947183	0.999998
cg08018585	13	46425866	SIAH3	SIAH3	17	24350490	-1.355	6.93557e-07	0.003565	0.291805	0.236748	0.999996	0.140465	0.547333	0.999987	-0.193886	0.429582	0.999999	0.0586503	0.801255	0.999998
cg24990131	6	6320710	F13A1	F13A1	4	163779782	2.68314	7.60063e-07	0.00379766	0.578421	0.23848	0.999996	0.275638	0.552831	0.999987	0.0668201	0.890769	0.999999	0.053445	0.90819	0.999998
cg01127608	9	129377854	LMX1B	LMX1B	15	14014999	-0.89747	7.92966e-07	0.00380035	-0.116856	0.475066	0.999996	-0.19639	0.210552	0.999987	-0.0238097	0.883944	0.999999	-0.0260611	0.866794	0.999998
cg18141888	20	21487412		NKX2-2	10	45006344	-1.49871	7.89823e-07	0.00380035	-0.131279	0.630206	0.999996	0.105391	0.68479	0.999987	0.0123485	0.963829	0.999999	-0.0219388	0.932593	0.999998
cg18039133	20	6750956	BMP2	BMP2	10	59743777	-1.03335	9.27873e-07	0.00435796	-0.0242244	0.898209	0.999996	0.104623	0.562657	0.999987	0.0543998	0.773992	0.999999	-0.0147096	0.935	0.999998
cg12746947	1	38227094	EPHA10	EPHA10	1	186821468	1.17499	9.87049e-07	0.00445759	0.133486	0.537549	0.999996	0.0945882	0.646144	0.999987	0.216343	0.319513	0.999999	0.157553	0.445458	0.999998
cg09792189	16	20360298	UMOD	UMOD	20	19194448	1.03631	9.81328e-07	0.00445759	-0.227519	0.236279	0.999996	0.329049	0.0752883	0.999987	-0.0878622	0.644992	0.999999	-0.00365862	0.98391	0.999998
cg16785533	8	70699475	SLCO5A1	SLCO5A1	8	70374468	0.506668	1.07436e-06	0.00476036	-0.00918039	0.921844	0.999996	0.0871938	0.330719	0.999987	0.0137122	0.883502	0.999999	0.0687856	0.441894	0.999998
cg06650659	3	193096597	ATP13A5	ATP13A5	2	4574505	1.27107	1.12936e-06	0.00480054	0.14597	0.53608	0.999996	-0.216864	0.336116	0.999987	-0.046147	0.844589	0.999999	0.255239	0.258635	0.999998
cg05211662	5	128795605	ADAMTS19	ADAMTS19	6	126927595	-2.03518	1.14476e-06	0.00480054	0.123783	0.742897	0.999996	-0.119626	0.739286	0.999987	0.0312231	0.934018	0.999999	-0.0444236	0.901585	0.999998
cg00942007	18	53090572	TCF4	TCF4	18	24769463	1.66953	1.10694e-06	0.00480054	-0.147723	0.632865	0.999996	0.230723	0.434537	0.999987	0.169106	0.584648	0.999999	0.210455	0.475689	0.999998
cg18023598	1	19992504	HTR6	HTR6	1	205063608	2.36733	1.202e-06	0.00486679	-0.119895	0.785253	0.999996	0.058551	0.88886	0.999987	-0.204682	0.642098	0.999999	-0.0921524	0.825944	0.999998
cg04752995	18	1707883		LINC00470	18	62946449	-1.02103	1.18161e-06	0.00486679	0.0889238	0.639369	0.999996	-0.100639	0.577907	0.999987	-0.0181794	0.923584	0.999999	-0.0940732	0.60288	0.999998
cg18374948	20	62194192	PRIC285	HELZ2	10	98789320	0.870031	1.23816e-06	0.00492821	-0.0137714	0.932214	0.999996	0.0234574	0.879113	0.999987	0.0539799	0.738986	0.999999	0.0159896	0.917422	0.999998
cg08258494	1	239987344	CHRM3	CHRM3	1	9256617	0.883184	1.28345e-06	0.00502334	-0.136607	0.408723	0.999996	-0.0323208	0.836778	0.999987	0.0544168	0.741208	0.999999	-0.0590949	0.706583	0.999998
cg00004257	1	34629175	CSMD2	CSMD2	1	190466148	1.42422	1.41371e-06	0.00538656	0.057225	0.830294	0.999996	0.0376357	0.882338	0.999987	-0.00375223	0.988784	0.999999	-0.0917753	0.718343	0.999998
cg00141162	3	121379777	HCLS1	HCLS1	2	154675253	-0.901609	1.468e-06	0.00538656	0.0121983	0.942571	0.999996	0.0894892	0.579711	0.999987	-0.239977	0.161447	0.999999	-0.102664	0.525454	0.999998
cg07968499	6	129811842	LAMA2	LAMA2	4	33053841	-1.44981	1.44942e-06	0.00538656	0.102393	0.706922	0.999996	-0.0935264	0.718414	0.999987	-0.251291	0.358216	0.999999	-0.00886359	0.972718	0.999998
cg14691671	17	73642503	RECQL5	RECQL5	16	72014698	-0.940554	1.45949e-06	0.00538656	-0.0513803	0.77119	0.999996	0.0516224	0.759044	0.999987	-0.0759876	0.667317	0.999999	0.0639007	0.70426	0.999998
cg23304318	8	144843290		FAM83H-AS1	8	144016937	3.41396	1.54522e-06	0.00548776	-0.316927	0.62258	0.999996	-0.255414	0.676959	0.999987	-0.422633	0.512078	0.999999	-0.116991	0.848534	0.999998
cg12787408	8	146160024	ZNF16	ZNF16	8	145251262	0.818924	1.56569e-06	0.00548776	0.053184	0.730587	0.999996	0.0717644	0.625938	0.999987	-0.0604521	0.695561	0.999999	-0.0885507	0.547831	0.999998
cg24437180	12	66275880	LOC100129940	HMGA2	11	65462442	-0.786043	1.53815e-06	0.00548776	-0.105347	0.477943	0.999996	-0.0518781	0.713095	0.999987	0.169695	0.255326	0.999999	-0.0464955	0.741697	0.999998
cg18671729	15	51748344	DMXL2	DMXL2	7	27842122	0.712834	1.60594e-06	0.00554605	0.147419	0.276659	0.999996	-0.0842762	0.511862	0.999987	-0.00764015	0.954712	0.999999	0.116593	0.365306	0.999998
cg22528685	11	4629597	TRIM68	TRIM68	14	64011087	-1.68902	1.70725e-06	0.0058105	-0.26223	0.414188	0.999996	-0.0409849	0.892992	0.999987	0.329227	0.306416	0.999999	0.233334	0.445354	0.999998
cg15004023	4	122659108		TMEM155	5	119568021	-0.98624	1.76068e-06	0.00590674	0.340749	0.0741091	0.999996	0.277982	0.124181	0.999987	0.376851	0.049204	0.999999	0.0242977	0.891548	0.999998
cg20541187	2	68882627	PROKR1	PROKR1	13	40139215	-0.95881	1.92863e-06	0.00625672	0.0493609	0.787212	0.999996	-0.0839341	0.630226	0.999987	-0.0124881	0.945531	0.999999	0.156271	0.371758	0.999998
cg01278380	2	226995088		LOC646736	12	113566460	-0.647138	2.02486e-06	0.00625672	-0.0375255	0.761746	0.999996	0.0784505	0.506681	0.999987	-0.0115358	0.925703	0.999999	-0.234139	0.0522178	0.999998
cg09478205	10	106402382	SORCS3	SORCS3	9	105210985	-3.78211	2.02287e-06	0.00625672	0.144248	0.841879	0.999996	-0.375443	0.586269	0.999987	0.175378	0.808382	0.999999	-0.0463922	0.946286	0.999998
cg23204908	11	9824185	SBF2	SBF2	14	55883093	0.818802	1.96291e-06	0.00625672	0.265175	0.0952661	0.999996	0.0146517	0.92158	0.999987	0.130785	0.404569	0.999999	-0.177964	0.235827	0.999998
cg00145079	15	68112888		SKOR1	7	44468844	1.05582	2.02219e-06	0.00625672	0.34639	0.091689	0.999996	0.0381186	0.842844	0.999987	-0.180627	0.373089	0.999999	-0.0585698	0.760728	0.999998
cg06126658	17	34998797		MRM1	16	34471529	-1.1137	1.90993e-06	0.00625672	-0.0873122	0.68104	0.999996	0.000145994	0.999424	0.999987	0.372942	0.0844378	0.999999	0.015883	0.937367	0.999998
cg15003132	3	2553182	CNTN4	CNTN4	2	133829342	-1.29506	2.06572e-06	0.00630008	0.0797201	0.747848	0.999996	0.224559	0.344111	0.999987	-0.081894	0.741224	0.999999	-0.0398099	0.866098	0.999998
cg05906698	9	13939800	LINC00583	LINC00583	15	69654733	0.836043	2.09701e-06	0.00631352	-0.141923	0.37771	0.999996	0.0394975	0.795739	0.999987	-0.0403254	0.801236	0.999999	-0.112883	0.460719	0.999998
cg05039548	1	91190366		BARHL2	1	133735759	-1.71187	2.26452e-06	0.00664739	-0.166087	0.614518	0.999996	0.0673274	0.83007	0.999987	-0.154317	0.639754	0.999999	0.0392754	0.900352	0.999998
cg17286983	17	60994324		TANC2	16	59361723	-0.90604	2.24981e-06	0.00664739	0.0863119	0.620802	0.999996	-0.00933691	0.955129	0.999987	-0.264188	0.134725	0.999999	0.0276275	0.867788	0.999998
cg01840281	5	75977657	IQGAP2	IQGAP2	6	73518824	0.68911	2.30957e-06	0.00669593	0.0167106	0.899792	0.999996	-0.0758301	0.549407	0.999987	0.147169	0.270955	0.999999	-0.00925382	0.941636	0.999998
cg26838905	5	176149913		TSPAN17	6	174181426	0.61959	2.46131e-06	0.00688101	0.0789434	0.510799	0.999996	-0.155964	0.176302	0.999987	0.0502467	0.675061	0.999999	-0.0871281	0.446501	0.999998
cg16621196	10	130757242		MGMT	9	129391201	1.17913	2.43717e-06	0.00688101	-0.0969263	0.670729	0.999996	-0.0405421	0.851769	0.999987	0.257504	0.261858	0.999999	-0.127779	0.556653	0.999998
cg26755700	20	56689164		C20orf85	10	93275368	-1.40148	2.41323e-06	0.00688101	0.0947228	0.726426	0.999996	-0.163525	0.526701	0.999987	-0.0167767	0.950551	0.999999	-0.0656728	0.798906	0.999998
cg14444476	9	133271439		ASS1	15	10105829	1.16832	2.65041e-06	0.00699036	0.12551	0.580551	0.999996	0.303232	0.165248	0.999987	0.471639	0.0425569	0.999999	0.00253066	0.99065	0.999998
cg05871901	8	140835264	TRAPPC9	TRAPPC9	8	140040822	0.56722	2.75648e-06	0.00699036	-0.00164623	0.988093	0.999996	0.0282661	0.788011	0.999987	0.22674	0.0449723	0.999999	-0.223587	0.0382614	0.999998
cg13023870	14	37124018		PAX9	7	98720483	2.18158	2.7073e-06	0.00699036	-0.869235	0.0454297	0.999996	-0.684784	0.0954475	0.999987	-0.468551	0.272496	0.999999	-0.417	0.304778	0.999998
cg10266332	2	171572525	LINC01124	SP5	12	57854529	-1.89768	2.76833e-06	0.00699036	-0.251793	0.496402	0.999996	0.129074	0.713779	0.999987	-0.0866898	0.814395	0.999999	-0.221172	0.530335	0.999998
cg00404641	3	131080516	NUDT16P	LOC339874	2	33653811	-1.00469	2.55191e-06	0.00699036	-0.347615	0.0795661	0.999996	-0.182195	0.328342	0.999987	-0.208788	0.286536	0.999999	-0.10294	0.579255	0.999998
cg13951490	5	140799290	PCDHGA4	PCDHGA8	6	138791379	-1.13374	2.63372e-06	0.00699036	0.146404	0.506746	0.999996	0.210496	0.317937	0.999987	0.253336	0.253157	0.999999	0.170645	0.417176	0.999998
cg03977089	8	65287005		MIR124-2HG	8	64991324	-1.07468	2.58048e-06	0.00699036	-0.242233	0.248574	0.999996	-0.0167236	0.932806	0.999987	-0.00849857	0.967444	0.999999	-0.0802371	0.686109	0.999998
cg04619304	12	24434537	SOX5	SOX5	11	25574031	1.03793	2.72595e-06	0.00699036	-0.204549	0.313612	0.999996	0.193897	0.315922	0.999987	-0.0070059	0.972296	0.999999	0.049767	0.795715	0.999998
cg16025188	14	66892329		CCDC196	7	128491247	1.0621	2.71817e-06	0.00699036	0.0151596	0.941449	0.999996	0.226779	0.252502	0.999987	0.162748	0.432128	0.999999	0.110177	0.575913	0.999998
cg16475993	3	98283745		CPOX	2	177540287	0.718657	2.85285e-06	0.00712714	-0.0032639	0.981405	0.999996	0.0220346	0.868812	0.999987	-0.00605439	0.965515	0.999999	-0.107717	0.421192	0.999998
cg18580296	7	15726411	MEOX2	MEOX2	3	99311091	1.11566	2.91403e-06	0.00712832	0.122707	0.573657	0.999996	-0.0132805	0.948925	0.999987	0.0969159	0.656511	0.999999	-0.00207606	0.99201	0.999998
cg27636330	10	133976763	JAKMIP3	JAKMIP3	9	132615947	-0.976416	2.90374e-06	0.00712832	0.0900411	0.636832	0.999996	0.158567	0.384284	0.999987	-0.0779497	0.682635	0.999999	0.0519138	0.774856	0.999998
cg18187729	8	133117493	HHLA1	HHLA1	8	132389442	0.6686	3.00396e-06	0.00719834	0.363359	0.00779398	0.999996	0.089926	0.471377	0.999987	0.0893267	0.495432	0.999999	0.0628466	0.614139	0.999998
cg14352601	7	139555906	TBXAS1	TBXAS1	3	166275009	0.6512	2.99302e-06	0.00719834	0.0243847	0.84805	0.999996	0.0166985	0.890424	0.999987	-0.123294	0.335294	0.999999	-0.0219118	0.856553	0.999998
cg03587117	11	100227279	CNTN5	CNTN5	14	93679080	0.86032	3.09828e-06	0.00734938	0.0983554	0.56006	0.999996	0.0120159	0.940297	0.999987	0.138105	0.414146	0.999999	-0.00854491	0.957523	0.999998
cg17343324	8	78311298		PEX2	8	77871584	1.17435	3.21666e-06	0.00752958	-0.0838064	0.716265	0.999996	-0.110032	0.616641	0.999987	-0.0591961	0.797311	0.999999	0.0428528	0.845219	0.999998
cg03334256	9	130498316	TOR2A	TOR2A	15	12876565	-1.09857	3.23838e-06	0.00752958	0.169613	0.433215	0.999996	-0.110401	0.591532	0.999987	-0.0936968	0.664242	0.999999	-0.0916758	0.655709	0.999998
cg15793607	2	18702356		RDH14	13	90456240	0.786569	3.30358e-06	0.00755604	-0.0967036	0.532491	0.999996	0.212101	0.154766	0.999987	-0.0602144	0.697095	0.999999	0.0794381	0.590126	0.999998
cg24916284	2	105372789		LINC01114	13	8520657	-0.780962	3.34215e-06	0.00755604	-0.150298	0.330493	0.999996	-0.0175771	0.904351	0.999987	-0.000416412	0.997836	0.999999	0.00671394	0.963387	0.999998
cg09534893	2	207846643		CPO	12	94404634	-1.09931	3.34628e-06	0.00755604	-0.0283442	0.895686	0.999996	-0.0258035	0.900277	0.999987	-0.22565	0.299728	0.999999	0.0615435	0.765137	0.999998
cg17759921	6	45458155	RUNX2	RUNX2	4	123873347	0.60494	3.47588e-06	0.00777393	-0.0941659	0.431333	0.999996	0.0522389	0.645905	0.999987	-0.0435589	0.715038	0.999999	-0.0324107	0.775422	0.999998
cg22014834	1	153030567	SPRR2A	SPRR2A	1	98020037	-1.11713	3.6444e-06	0.00788591	-0.122495	0.579664	0.999996	-0.288333	0.175146	0.999987	-0.212513	0.338413	0.999999	-0.249471	0.239432	0.999998
cg15707869	8	88884985	DCAF4L2	DCAF4L2	8	88252049	0.915954	3.66027e-06	0.00788591	0.230715	0.206958	0.999996	0.0550018	0.749905	0.999987	0.161326	0.375171	0.999999	0.0375845	0.827511	0.999998
cg16161646	9	98386166		PTCH1	15	112195832	1.01491	3.59556e-06	0.00788591	0.0420771	0.833728	0.999996	-0.0691784	0.717246	0.999987	-0.200522	0.319931	0.999999	-0.048898	0.79789	0.999998
cg24248713	18	31803615	NOL4	NOL4	18	48272392	0.766598	3.57191e-06	0.00788591	-0.0729157	0.63035	0.999996	-0.23432	0.109517	0.999987	-0.0433506	0.774594	0.999999	-0.152549	0.293112	0.999998
cg11696094	20	44739333		CD40	10	81303144	0.981188	3.7231e-06	0.00789635	0.396401	0.0463205	0.999996	0.0343684	0.852574	0.999987	0.116431	0.549522	0.999999	0.16331	0.379381	0.999998
cg16672408	18	53014959	TCF4	TCF4	18	24845808	-1.14438	3.73237e-06	0.00789635	0.168697	0.457793	0.999996	0.00982638	0.963662	0.999987	0.020286	0.928618	0.999999	-0.0913619	0.672204	0.999998
cg07477792	3	117716071		IGSF11	2	158262216	-1.13438	3.9565e-06	0.00800408	0.109718	0.626639	0.999996	-0.0724557	0.735725	0.999987	0.161508	0.474684	0.999999	-0.0202497	0.924799	0.999998
cg02891697	6	36665511	RAB44	RAB44	4	132744764	-0.669714	3.98724e-06	0.00800408	0.206947	0.125196	0.999996	0.0658089	0.60409	0.999987	-0.0897665	0.500979	0.999999	0.0752255	0.553566	0.999998
cg20967220	6	53013647	GCM1	GCM1	4	116452648	0.840856	3.98779e-06	0.00800408	0.0746531	0.655283	0.999996	-0.00760341	0.961881	0.999987	0.0300839	0.857082	0.999999	-0.23124	0.15123	0.999998
cg10582639	11	121526840		SORL1	14	114698665	-1.6083	3.84742e-06	0.00800408	0.236013	0.460594	0.999996	-0.0826368	0.785607	0.999987	0.121728	0.702829	0.999999	-0.0464423	0.878458	0.999998
cg01116977	13	38183987		POSTN	17	16435633	1.25155	3.96384e-06	0.00800408	0.0609472	0.806328	0.999996	-0.0958865	0.685711	0.999987	0.0055555	0.982164	0.999999	-0.0948645	0.688878	0.999998
cg13782495	14	95513543		DICER1	7	157234121	0.785657	3.8939e-06	0.00800408	-0.0192899	0.901497	0.999996	0.0619001	0.676995	0.999987	0.0837336	0.591706	0.999999	0.113154	0.447495	0.999998
cg14588178	10	48439430	GDF10	GDF10	9	49646593	-0.771302	4.23786e-06	0.00831737	-0.135964	0.378772	0.999996	-0.178332	0.227476	0.999987	-0.155972	0.313368	0.999999	0.0179324	0.902548	0.999998
cg02891579	10	102823812	KAZALD1	KAZALD1	9	101538288	0.703276	4.25013e-06	0.00831737	-0.164709	0.244025	0.999996	-0.107983	0.420618	0.999987	-0.03742	0.789641	0.999999	-0.0237209	0.859048	0.999998
cg01524853	12	54447807	HOXC4	HOXC4	11	53656142	1.01826	4.19087e-06	0.00831737	-0.00489748	0.980737	0.999996	0.0909179	0.638398	0.999987	0.0182228	0.928418	0.999999	0.129664	0.503319	0.999998
cg14601136	3	186080043	DGKG	DGKG	2	91705757	-1.29473	4.36815e-06	0.00833983	-0.13637	0.598483	0.999996	0.188339	0.446009	0.999987	-0.0441978	0.864281	0.999999	-0.15655	0.525979	0.999998
cg25309017	5	128796266	ADAMTS19	ADAMTS19	6	126928255	-1.69002	4.36434e-06	0.00833983	0.00272094	0.993566	0.999996	-0.0907786	0.77772	0.999987	0.0580676	0.863398	0.999999	0.005868	0.985434	0.999998
cg06967014	20	2384240	TGM6	TGM6	10	64098018	0.815631	4.35732e-06	0.00833983	0.0162541	0.920495	0.999996	0.0416561	0.788359	0.999987	-0.101848	0.532659	0.999999	-0.048585	0.754247	0.999998
cg15622583	1	3072265	PRDM16	PRDM16	1	221362710	0.83831	4.52855e-06	0.00857069	0.109843	0.513689	0.999996	0.0150089	0.925165	0.999987	0.0115155	0.945271	0.999999	-0.118972	0.458039	0.999998
cg17760391	5	66124501	MAST4	MAST4	6	65413368	-0.952441	4.56206e-06	0.00857069	-0.173416	0.365484	0.999996	-0.0147068	0.93546	0.999987	0.0876561	0.64613	0.999999	-0.0516538	0.776196	0.999998
cg27532732	6	35480036	TULP1	TULP1	4	133974818	-0.754044	4.83653e-06	0.00901423	0.0539337	0.721987	0.999996	-0.0108731	0.939927	0.999987	-0.296041	0.0560243	0.999999	0.00622044	0.96561	0.999998
cg21240614	11	1852250		SYT8	14	1908395	0.979533	5.04022e-06	0.00931988	-0.0244289	0.901438	0.999996	-0.0236277	0.899927	0.999987	-0.140246	0.478409	0.999999	0.119853	0.524535	0.999998
cg05845819	6	41731585		FRS3	4	127625836	-0.699368	5.16104e-06	0.00946874	0.0550002	0.69679	0.999996	-0.0188718	0.888281	0.999987	-0.122283	0.388042	0.999999	0.0675165	0.615761	0.999998
cg02855576	7	153749964	DPP6	DPP6	3	180038562	-2.84925	5.20802e-06	0.00948086	-0.0915945	0.873417	0.999996	0.330916	0.546486	0.999987	0.568103	0.325874	0.999999	-0.0351262	0.948849	0.999998
cg10068045	19	2291785	LINGO3	LINGO3	19	2138582	-1.47265	5.26021e-06	0.00950221	-0.221928	0.456873	0.999996	-0.427449	0.136471	0.999987	-0.182781	0.539587	0.999999	-0.378998	0.185477	0.999998
cg09052453	5	128796097	ADAMTS19	ADAMTS19	6	126928086	-4.42386	5.38648e-06	0.00965603	-0.61365	0.493829	0.999996	0.573852	0.501696	0.999987	0.5415	0.545733	0.999999	0.0441971	0.95862	0.999998
cg27304144	1	22211074	HSPG2	HSPG2	1	202878330	-0.960099	5.81688e-06	0.00990654	-0.0717714	0.713008	0.999996	0.153579	0.410193	0.999987	-0.160584	0.41207	0.999999	-0.0291965	0.875092	0.999998
cg11369173	2	137667339		THSD7B	12	22104669	-0.808497	5.72361e-06	0.00990654	-0.197182	0.233382	0.999996	0.113292	0.469794	0.999987	0.216493	0.19152	0.999999	0.236074	0.136104	0.999998
cg05238478	3	59545600		FHIT	2	115736433	-0.924204	5.82152e-06	0.00990654	0.276136	0.146431	0.999996	0.136026	0.44833	0.999987	0.0563099	0.764285	0.999999	-0.0459071	0.797421	0.999998
cg02167021	3	121379791	HCLS1	HCLS1	2	154675239	-1.07198	5.67446e-06	0.00990654	-0.111721	0.607847	0.999996	0.0241749	0.907057	0.999987	-0.0598287	0.783226	0.999999	-0.10571	0.610226	0.999998
cg19273074	12	41832738	PDZRN4	PDZRN4	11	40819040	1.13342	5.60511e-06	0.00990654	-0.0332297	0.884967	0.999996	0.118251	0.589466	0.999987	-0.0468778	0.838299	0.999999	0.0818049	0.708669	0.999998
cg24859589	17	47991661		DLX4	16	46871033	-0.854547	5.8041e-06	0.00990654	-0.17044	0.328783	0.999996	0.0974147	0.556413	0.999987	-0.138909	0.42518	0.999999	-0.13639	0.411168	0.999998
cg06371836	20	22559867	C20orf56	LINC00261	10	43934069	0.751537	5.71326e-06	0.00990654	0.0628549	0.680436	0.999996	0.0635818	0.661862	0.999987	-0.277929	0.0738698	0.999999	0.0637004	0.661272	0.999998
cg22754569	8	59564444	NSMAF	NSMAF	8	59305442	-0.174522	0.449951	0.990298	0.15357	0.526155	0.999996	-0.00310745	0.989229	0.999987	1.60875	4.36203e-08	0.0102436	0.423131	0.0716049	0.999998
cg23151298	3	38846358		SCN10A	2	94258988	1.56706	6.14671e-06	0.0103847	-0.296134	0.356159	0.999996	-0.0709767	0.815514	0.999987	-0.0968907	0.761653	0.999999	-0.260204	0.394307	0.999998
cg21389309	7	154002618	DPP6	DPP6	3	180312366	-1.29532	6.24534e-06	0.0103856	-0.25153	0.343649	0.999996	-0.132046	0.600333	0.999987	-0.0519414	0.844149	0.999999	-0.176415	0.484524	0.999998
cg06350203	17	34062219	RASL10B	RASL10B	16	32079955	-1.18647	6.27993e-06	0.0103856	-0.0330679	0.891339	0.999996	0.0990762	0.667727	0.999987	-0.0673066	0.781046	0.999999	-0.130433	0.572305	0.999998
cg18532308	19	8642308	MYO1F	MYO1F	19	8472051	1.02441	6.23722e-06	0.0103856	0.0454392	0.827846	0.999996	-0.0874033	0.660835	0.999987	-0.107424	0.607648	0.999999	0.0308696	0.876723	0.999998
cg14406043	6	44025334	LOC101929705	C6orf223	4	125271314	-0.406499	6.37872e-06	0.0104752	0.0724712	0.384798	0.999996	0.0552622	0.48586	0.999987	0.13165	0.118193	0.999999	-0.0263244	0.739329	0.999998
cg01668014	8	144639901	GSDMD	GSDMD	8	143819203	0.831191	6.45541e-06	0.0105275	0.0514744	0.761959	0.999996	0.116975	0.471048	0.999987	0.00715166	0.966412	0.999999	-0.14308	0.378727	0.999998
cg24045194	2	140122875		YY1P2	12	26435228	-0.833076	6.81926e-06	0.0108939	-0.0145159	0.932267	0.999996	-0.145804	0.372432	0.999987	-0.074644	0.662431	0.999999	0.117488	0.471566	0.999998
cg17550348	3	133099521	TMEM108	TMEM108	2	35626015	0.94632	6.77908e-06	0.0108939	-0.0848387	0.66214	0.999996	0.249562	0.181473	0.999987	0.132241	0.496523	0.999999	-0.119105	0.520127	0.999998
cg13882309	5	140595009	PCDHB13	PCDHB13	6	138591265	0.924687	6.80219e-06	0.0108939	-0.00970453	0.959165	0.999996	-0.110661	0.540833	0.999987	0.162647	0.392941	0.999999	-0.069496	0.700536	0.999998
cg20183094	7	121950924		FEZF1-AS1	3	148707707	1.0936	6.96269e-06	0.0110479	-0.268296	0.23604	0.999996	-0.104166	0.626628	0.999987	0.0898046	0.689393	0.999999	0.250425	0.245422	0.999998
cg03214200	8	65553669	CYP7B1	CYP7B1	8	65276426	1.02035	7.2017e-06	0.0112748	-0.0219896	0.916554	0.999996	0.0855189	0.669132	0.999987	-0.006126	0.976712	0.999999	-0.0209139	0.916679	0.999998
cg06815950	12	111619455	CUX2	CUX2	11	110842367	0.860545	7.18465e-06	0.0112748	-0.228787	0.200604	0.999996	-0.236749	0.165164	0.999987	0.0145329	0.934553	0.999999	-0.0282493	0.866931	0.999998
cg06506831	7	27212579	HOXA10	HOXA10	3	87931991	1.20918	7.45916e-06	0.0116005	-0.232488	0.353453	0.999996	-0.0722429	0.761016	0.999987	-0.0593095	0.811964	0.999999	-0.0761363	0.748576	0.999998
cg27458372	7	14942813		DGKB	3	100093061	1.87795	7.70164e-06	0.0117443	0.0119985	0.975318	0.999996	0.091546	0.804343	0.999987	-0.0969432	0.802682	0.999999	0.379167	0.307782	0.999998
cg01583131	11	27744675	BDNF	BDNF	14	37726290	-1.30661	7.69575e-06	0.0117443	-0.34128	0.210317	0.999996	-0.284185	0.272383	0.999987	-0.121074	0.654025	0.999999	0.126241	0.623794	0.999998
cg12201142	19	14320871		ADGRL1	19	13820228	-1.05548	7.63656e-06	0.0117443	0.00248708	0.990891	0.999996	-0.0357699	0.863167	0.999987	0.161166	0.460929	0.999999	0.000638702	0.997544	0.999998
cg10312447	12	120036581	TMEM233	TMEM233	11	119370149	0.924272	7.90959e-06	0.0119083	0.0126425	0.947277	0.999996	0.0340112	0.851872	0.999987	0.26141	0.176365	0.999999	-0.171979	0.347578	0.999998
cg02611744	18	74962792	GALR1	GALR1	18	2819123	-1.77382	7.91057e-06	0.0119083	0.0359937	0.921857	0.999996	0.106036	0.76171	0.999987	-0.183429	0.617657	0.999999	-0.114289	0.743813	0.999998
cg09369939	2	47629162	MSH2	MSH2	13	61396915	-0.78761	7.98019e-06	0.0119365	-0.084608	0.604309	0.999996	0.136385	0.381949	0.999987	0.141766	0.386637	0.999999	0.0277607	0.858121	0.999998
cg07738839	6	30128558	TRIM10	TRIM10	4	139737366	0.922179	8.43042e-06	0.0125302	0.113357	0.554711	0.999996	-0.11425	0.532043	0.999987	0.140565	0.464376	0.999999	0.13367	0.465106	0.999998
cg04965463	5	108150436	FER	FER	6	106314691	0.690042	8.63949e-06	0.0126086	-0.265375	0.0699641	0.999996	0.181027	0.190038	0.999987	-0.137043	0.342251	0.999999	0.203232	0.142308	0.999998
cg03716678	8	125222864	LOC101927588	FER1L6	8	124537204	0.817348	8.59639e-06	0.0126086	0.172103	0.314152	0.999996	0.125581	0.43949	0.999987	-0.0862463	0.612318	0.999999	0.0562246	0.728497	0.999998
cg01225004	14	101922290		MIR1247	7	163681448	0.960149	8.64426e-06	0.0126086	0.243506	0.226824	0.999996	-0.178378	0.350889	0.999987	0.104671	0.600748	0.999999	0.0637451	0.73768	0.999998
cg07090986	2	207731441		FASTKD2	12	94294797	-1.19739	8.74866e-06	0.0126821	-0.133167	0.593717	0.999996	0.122865	0.60531	0.999987	-0.0345191	0.88984	0.999999	0.00803287	0.973003	0.999998
cg08805054	11	118781728	BCL9L	BCL9L	14	111973870	0.627409	8.86345e-06	0.0127697	0.0683514	0.601546	0.999996	0.00328413	0.978951	0.999987	-0.0773037	0.554992	0.999999	0.0172822	0.889587	0.999998
cg22866480	18	13567693	LDLRAD4	LDLRAD4	18	74196926	0.917408	8.96489e-06	0.0128371	-0.164586	0.391513	0.999996	-0.0539469	0.767202	0.999987	0.099787	0.602369	0.999999	0.0919503	0.614214	0.999998
cg12991385	6	29599259	GABBR1	GABBR1	4	140596656	-0.739624	9.10305e-06	0.0129559	0.123919	0.423744	0.999996	-0.11636	0.430301	0.999987	-0.0954333	0.537207	0.999999	-0.134045	0.364184	0.999998
cg24297718	6	140981889		MIR4465	4	44354416	0.683088	9.29648e-06	0.0131515	0.0380337	0.789907	0.999996	-0.291793	0.0366568	0.999987	0.0403172	0.777627	0.999999	-0.0695579	0.609382	0.999998
cg05287817	3	186080015	DGKG	DGKG	2	91705729	-1.04589	9.54802e-06	0.0134265	0.190969	0.38505	0.999996	0.079453	0.703325	0.999987	-0.0321051	0.883376	0.999999	0.00564757	0.978385	0.999998
cg24354335	1	23291783	LACTBL1	TEX46	1	201814585	-0.67424	9.99716e-06	0.0136563	0.117977	0.406315	0.999996	0.258039	0.0609674	0.999987	-0.260146	0.0715015	0.999999	-0.23066	0.0925606	0.999998
cg11804932	10	106402507	SORCS3	SORCS3	9	105211110	-1.20906	1.00023e-05	0.0136563	0.185605	0.465872	0.999996	0.0157877	0.94791	0.999987	0.0294221	0.907681	0.999999	0.278217	0.253411	0.999998
cg04664583	10	133996549	JAKMIP3	JAKMIP3	9	132640039	-1.14726	9.88108e-06	0.0136563	0.0738055	0.759116	0.999996	0.383015	0.100188	0.999987	-0.0853636	0.722894	0.999999	0.0320924	0.888623	0.999998
cg15818557	20	43927098	MATN4	MATN4	10	80524181	0.951439	9.84596e-06	0.0136563	-0.0882102	0.658676	0.999996	-0.208768	0.275323	0.999987	0.0833211	0.67645	0.999999	0.0863164	0.64999	0.999998
cg20393750	20	58632422	C20orf197	C20orf197	10	95208171	0.952946	9.95125e-06	0.0136563	0.143393	0.474553	0.999996	-0.11075	0.561607	0.999987	-0.0459818	0.818127	0.999999	0.148695	0.436541	0.999998
cg12989128	20	42875933	GDAP1L1	GDAP1L1	10	79476159	-1.03694	1.01799e-05	0.0138185	0.0327005	0.88068	0.999996	0.36395	0.0850126	0.999987	0.160927	0.461516	0.999999	0.0159996	0.938534	0.999998
cg11611580	6	114661277		HS3ST5	4	17966751	-0.926148	1.03826e-05	0.013958	-0.0703996	0.717997	0.999996	-0.0562092	0.762051	0.999987	0.317862	0.108254	0.999999	-0.00137046	0.994106	0.999998
cg03477214	7	27212581	HOXA10	HOXA10	3	87931989	1.2968	1.0461e-05	0.013958	0.0220925	0.935472	0.999996	0.213032	0.414332	0.999987	-0.107886	0.692839	0.999999	-0.237193	0.363884	0.999998
cg05620113	17	75797102		LINC01973	16	74167453	0.901345	1.04261e-05	0.013958	0.0369053	0.845716	0.999996	-0.0745699	0.680015	0.999987	-0.00671339	0.971757	0.999999	0.0652739	0.718014	0.999998
cg09762732	11	128096242		ETS1	14	120946578	0.755953	1.06113e-05	0.0139995	0.0360808	0.820763	0.999996	-0.129611	0.39482	0.999987	0.102101	0.522355	0.999999	-0.286219	0.0646033	0.999998
cg23413527	15	95145293		MCTP2	7	73687539	1.20389	1.05864e-05	0.0139995	0.283361	0.267278	0.999996	-0.220961	0.362593	0.999987	-0.133953	0.597841	0.999999	0.105121	0.663675	0.999998
cg13565401	6	32906532	HLA-DMB	HLA-DMB	4	136584532	1.33413	1.10517e-05	0.0143866	0.185897	0.510402	0.999996	-0.0974614	0.716634	0.999987	-0.119877	0.670753	0.999999	0.159291	0.553566	0.999998
cg02402368	8	6420726	ANGPT2	MCPH1	8	7300997	-0.952611	1.10884e-05	0.0143866	-0.0332318	0.868812	0.999996	-0.0598184	0.755044	0.999987	-0.223094	0.271001	0.999999	-0.00227867	0.990512	0.999998
cg20593868	20	62588672	UCKL1	ZNF512B	10	99184144	-0.481538	1.09821e-05	0.0143866	0.0467635	0.645839	0.999996	-0.000579443	0.995224	0.999987	-0.00153323	0.987963	0.999999	-0.0105876	0.912912	0.999998
cg09447578	7	21582444	DNAH11	DNAH11	3	93524186	-1.35164	1.12319e-05	0.0144198	-0.265272	0.355605	0.999996	-0.185812	0.495901	0.999987	-0.837602	0.00522445	0.999999	-0.82018	0.00418595	0.999998
cg24564339	12	52685350	KRT81	KRT86	11	51871138	-0.632625	1.12805e-05	0.0144198	0.0785968	0.557566	0.999996	0.108364	0.397032	0.999987	0.282609	0.0395491	0.999999	-0.0439471	0.73029	0.999998
cg01740633	4	87770576	SLC10A6	SLC10A6	5	85251118	-1.2124	1.13597e-05	0.0144198	-0.340633	0.188714	0.999996	0.0991992	0.684925	0.999987	0.0963922	0.707212	0.999999	0.31263	0.205003	0.999998
cg06131802	16	30661708	PRR14	PRR14	20	28056692	0.864583	1.13376e-05	0.0144198	0.0420957	0.817959	0.999996	0.223212	0.204414	0.999987	-0.1372	0.45455	0.999999	0.077308	0.657487	0.999998
cg11145581	1	23523635		HTR1D	1	201584348	0.809552	1.14566e-05	0.0144646	0.0146838	0.931693	0.999996	0.0120941	0.940917	0.999987	0.103871	0.545181	0.999999	-0.03674	0.821905	0.999998
cg10091025	3	187454376	BCL6	BCL6	2	10087370	-0.688963	1.15437e-05	0.0144966	-0.055197	0.705352	0.999996	0.115531	0.407625	0.999987	-0.0314836	0.829148	0.999999	-0.108564	0.436257	0.999998
cg19716643	14	52735026	PTGDR	PTGDR	7	114392260	1.7161	1.17384e-05	0.0146628	0.296937	0.416124	0.999996	-0.335545	0.335488	0.999987	0.0332046	0.927257	0.999999	0.221437	0.523711	0.999998
cg02080531	5	153852760		HAND1	6	151879751	-1.15688	1.19296e-05	0.014755	-0.108461	0.658911	0.999996	-0.164984	0.481665	0.999987	0.131862	0.591718	0.999999	-0.116922	0.617494	0.999998
cg04620332	6	37225051	TMEM217	TMEM217	4	132175878	0.751831	1.20549e-05	0.014755	0.0805118	0.614479	0.999996	0.00169785	0.991089	0.999987	-0.11091	0.488373	0.999999	-0.224718	0.144577	0.999998
cg19206705	6	157890509	ZDHHC14	ZDHHC14	4	63800091	0.802024	1.20636e-05	0.014755	0.0707083	0.678242	0.999996	-0.00900751	0.955707	0.999987	-0.0338901	0.84226	0.999999	-0.0476685	0.768926	0.999998
cg05793020	20	43374889	KCNK15	KCNK15	10	79987258	1.23786	1.20276e-05	0.014755	0.154561	0.557171	0.999996	-0.17191	0.493365	0.999987	0.266989	0.312564	0.999999	0.00105238	0.996645	0.999998
cg25390412	7	158167768	PTPRN2	PTPRN2	3	184326214	0.553543	1.22416e-05	0.0148184	-0.191989	0.10816	0.999996	0.172105	0.129868	0.999987	0.029791	0.800121	0.999999	-0.103014	0.360302	0.999998
cg09086087	16	68000763	SLC12A4	SLC12A4	20	55184920	-0.729223	1.22067e-05	0.0148184	-0.140221	0.367784	0.999996	0.144386	0.330652	0.999987	-0.100252	0.518616	0.999999	0.00647755	0.964987	0.999998
cg20096562	14	98962905		C14orf177	7	160696951	0.959728	1.23519e-05	0.0148752	-0.1037	0.611848	0.999996	-0.174868	0.370605	0.999987	0.121267	0.553142	0.999999	0.0328008	0.865998	0.999998
cg27399034	2	12880639	TRIB2	TRIB2	13	96066621	0.66021	1.25383e-05	0.0149464	0.0358869	0.798463	0.999996	-0.112502	0.402546	0.999987	0.0232688	0.868474	0.999999	-0.119256	0.375151	0.999998
cg06025835	5	76507298	PDE8B	PDE8B	6	74043468	-0.931612	1.25137e-05	0.0149464	-0.316917	0.115367	0.999996	0.0196455	0.917135	0.999987	0.210318	0.291973	0.999999	-0.0366096	0.846291	0.999998
cg13708460	14	89385648		TTC8	7	151056767	0.985522	1.27265e-05	0.0150941	-0.153	0.467524	0.999996	-0.139459	0.486795	0.999987	0.0176086	0.933151	0.999999	-0.000426832	0.998297	0.999998
cg12109978	2	2585322		MYT1L	13	106215954	1.27097	1.29478e-05	0.0151274	-0.137475	0.612522	0.999996	-0.287832	0.268442	0.999987	0.15232	0.574818	0.999999	-0.195574	0.450258	0.999998
cg01788836	11	1771953	IFITM10	MOB2	14	1829184	-0.531201	1.28819e-05	0.0151274	0.0072676	0.948825	0.999996	0.130499	0.230415	0.999987	-0.185398	0.107113	0.999999	-0.128818	0.236372	0.999998
cg07890490	13	40176676	LHFP	LHFPL6	17	18316020	-0.859691	1.29286e-05	0.0151274	-0.0421197	0.818308	0.999996	-0.0375602	0.829709	0.999987	0.117384	0.522944	0.999999	0.0113752	0.948053	0.999998
cg18899355	5	52773135		FST	6	51792211	-1.03385	1.30157e-05	0.0151315	0.173835	0.432264	0.999996	-0.0437277	0.83513	0.999987	-0.0623181	0.77759	0.999999	-0.061906	0.768323	0.999998
cg20172500	3	6902432	GRM7	GRM7	2	138216260	-0.960989	1.31666e-05	0.0152315	0.0726411	0.723445	0.999996	-0.0984666	0.614838	0.999987	0.0547434	0.789652	0.999999	0.0892009	0.648421	0.999998
cg17929959	18	19873627		GATA6	18	60111481	0.575397	1.35424e-05	0.0155894	-0.016168	0.895464	0.999996	-0.0816587	0.487236	0.999987	-0.00777259	0.94963	0.999999	-0.111	0.346203	0.999998
cg03519593	17	56274597	EPX	EPX	16	38604150	1.2592	1.39591e-05	0.0159907	-0.0295136	0.91289	0.999996	-0.0592413	0.817726	0.999987	0.0206076	0.939111	0.999999	-0.0536551	0.834643	0.999998
cg15310800	2	179171625	OSBPL6	OSBPL6	12	65431011	0.855016	1.41484e-05	0.0160475	-0.0164828	0.928365	0.999996	-0.190469	0.278871	0.999987	0.136812	0.457052	0.999999	0.0887741	0.611765	0.999998
cg27002378	5	128795815	ADAMTS19-AS1	ADAMTS19	6	126927805	-2.80246	1.42137e-05	0.0160475	-0.348101	0.563307	0.999996	-0.0678192	0.905717	0.999987	-0.107709	0.857815	0.999999	-0.164946	0.773386	0.999998
cg10529599	14	101532328	MIR656	MIR410	7	163286102	1.11072	1.41283e-05	0.0160475	-0.290432	0.226795	0.999996	0.0301576	0.894243	0.999987	-0.122429	0.607759	0.999999	0.165661	0.466646	0.999998
cg15882762	5	112770403	TSSK1B	TSSK1B	6	110960559	0.548313	1.44899e-05	0.0161267	0.0362709	0.758189	0.999996	-0.0996737	0.376462	0.999987	0.0563217	0.632895	0.999999	0.0109651	0.922123	0.999998
cg00235442	7	157408294	PTPRN2	PTPRN2	3	183625339	0.648425	1.44897e-05	0.0161267	0.23113	0.102521	0.999996	-0.0418661	0.752414	0.999987	-0.15326	0.274579	0.999999	0.0246877	0.852371	0.999998
cg07949309	16	86422032		LINC00917	20	73389290	0.786603	1.43815e-05	0.0161267	0.209648	0.21863	0.999996	0.0188689	0.906608	0.999987	-0.183101	0.281588	0.999999	0.0447423	0.780953	0.999998
cg12166259	2	218203230	DIRC3	DIRC3	12	104734419	0.869121	1.51278e-05	0.0167573	0.080908	0.665872	0.999996	-0.0602725	0.73546	0.999987	-0.0213031	0.909381	0.999999	0.10237	0.566575	0.999998
cg06899530	1	166916866	ILDR2	ILDR2	1	24302800	-1.22879	1.59931e-05	0.0173306	-0.15348	0.564061	0.999996	-0.164867	0.515602	0.999987	0.0471979	0.85895	0.999999	-0.180623	0.476524	0.999998
cg21356630	6	167753807	TTLL2	TTLL2	4	3273700	0.676216	1.59777e-05	0.0173306	0.000262317	0.998568	0.999996	0.0412936	0.766825	0.999987	0.0497256	0.733806	0.999999	-0.212366	0.132412	0.999998
cg14058100	14	104622028	KIF26A	KIF26A	7	166471889	-0.922154	1.57244e-05	0.0173306	0.264067	0.189332	0.999996	0.0280696	0.882326	0.999987	-0.158367	0.428065	0.999999	-0.0465271	0.806227	0.999998
cg19468528	17	73642404	LOC100130933	RECQL5	16	72014599	-0.960648	1.60143e-05	0.0173306	0.224514	0.282928	0.999996	-0.113978	0.565159	0.999987	0.166508	0.424361	0.999999	-0.0655588	0.740421	0.999998
cg13686919	19	5335045	PTPRS	PTPRS	19	5267706	0.519866	1.58933e-05	0.0173306	-0.189275	0.0974907	0.999996	0.00348771	0.973989	0.999987	0.0699965	0.534048	0.999999	0.0969745	0.367016	0.999998
cg25978327	1	8065039		ERRFI1	1	216516395	0.939183	1.62701e-05	0.0174688	-0.043154	0.831844	0.999996	0.0767077	0.69212	0.999987	0.319802	0.120947	0.999999	0.0995377	0.607605	0.999998
cg11084883	13	22452051	LINC00424	LINC00424	17	2044686	0.782054	1.6302e-05	0.0174688	0.0385521	0.819826	0.999996	-0.0614967	0.70304	0.999987	0.0761403	0.653123	0.999999	-0.123691	0.444453	0.999998
cg23753415	17	32909292	TMEM132E	TMEM132E	16	30958744	-0.993636	1.63652e-05	0.0174688	-0.19891	0.357472	0.999996	0.116612	0.569905	0.999987	0.241646	0.264779	0.999999	-0.00305759	0.98809	0.999998
cg19120457	3	11675300	VGLL4	VGLL4	2	143024944	-0.547418	1.66127e-05	0.0174869	0.00397657	0.973249	0.999996	-0.0310107	0.783761	0.999987	0.0676758	0.568971	0.999999	0.00988506	0.930265	0.999998
cg00610844	5	6583797	LOC255167	LINC01018	6	6501085	-0.703358	1.65829e-05	0.0174869	-0.21627	0.160772	0.999996	-0.11366	0.435195	0.999987	0.0355865	0.815363	0.999999	-0.21915	0.136309	0.999998
cg13691961	12	89743281	DUSP6	DUSP6	11	89050583	-1.21459	1.668e-05	0.0174869	0.133541	0.61242	0.999996	0.102794	0.682069	0.999987	0.0938696	0.721539	0.999999	-0.0610789	0.807567	0.999998
cg27082486	16	24621928		RBBP6	20	22969401	-1.30003	1.66767e-05	0.0174869	-0.157494	0.576813	0.999996	-0.016792	0.950098	0.999987	-0.0372704	0.894748	0.999999	0.0701192	0.793916	0.999998
cg21148362	3	62353708		FEZF2	2	118532811	-1.93924	1.71389e-05	0.0178882	0.181237	0.667137	0.999996	-0.0174563	0.965272	0.999987	-0.156789	0.709765	0.999999	0.0403981	0.919746	0.999998
cg16733643	1	41575522	SCMH1	SCMH1	1	183437931	0.672649	1.73653e-05	0.0179648	-0.0476377	0.74458	0.999996	0.276063	0.0526445	0.999987	0.266187	0.0740898	0.999999	-0.0253136	0.855715	0.999998
cg11806439	14	101157950		LINC00523	7	162907827	1.44473	1.73225e-05	0.0179648	-0.0243302	0.938201	0.999996	0.0888311	0.766442	0.999987	-0.0104426	0.973453	0.999999	0.224512	0.454135	0.999998
cg06341464	3	62200289	PTPRG	PTPRG	2	118379954	0.748193	1.75576e-05	0.017992	0.0229371	0.887868	0.999996	-0.0949977	0.540694	0.999987	-0.172326	0.292669	0.999999	-0.0759384	0.624536	0.999998
cg09104769	4	170863980	LOC100506085	LINC02275	5	167244446	0.813969	1.76207e-05	0.017992	0.103339	0.560131	0.999996	-0.03189	0.85	0.999987	0.00140366	0.993672	0.999999	-0.169431	0.317868	0.999998
cg04836612	14	86088494	FLRT2	FLRT2	7	147823075	-0.93604	1.76215e-05	0.017992	-0.267423	0.193508	0.999996	0.107982	0.578262	0.999987	-0.0129462	0.949285	0.999999	0.111703	0.565288	0.999998
cg20837474	1	28765433	PHACTR4	PHACTR4	1	196271077	-1.20703	1.8133e-05	0.0183547	-0.0443818	0.865986	0.999996	0.0381565	0.87893	0.999987	0.217158	0.410823	0.999999	0.473024	0.0644424	0.999998
cg06236259	21	16072664		LOC388813	3	32149884	0.559766	1.80954e-05	0.0183547	0.0348106	0.775365	0.999996	0.105339	0.366794	0.999987	-0.0172822	0.887296	0.999999	0.0873395	0.453584	0.999998
cg26799881	13	84455576	SLITRK1	SLITRK1	17	65734855	-1.17474	1.83894e-05	0.0185343	-0.0147885	0.95396	0.999996	-0.127967	0.600546	0.999987	-0.0674229	0.792464	0.999999	0.0740927	0.7615	0.999998
cg08697985	9	23849607		ELAVL2	15	59868368	0.818281	1.85452e-05	0.0186115	0.0383222	0.830071	0.999996	-0.0318323	0.851531	0.999987	-0.13565	0.448929	0.999999	-0.110666	0.516248	0.999998
cg16329730	10	106584751	SORCS3	SORCS3	9	105387456	0.788685	1.87341e-05	0.0187211	0.0632862	0.713417	0.999996	0.192316	0.244849	0.999987	0.276304	0.114047	0.999999	0.160437	0.330746	0.999998
cg02063370	2	37415630	SULT6B1	SULT6B1	13	71724688	-0.628991	1.89478e-05	0.0188544	0.0783606	0.569267	0.999996	0.055152	0.673817	0.999987	0.0188452	0.890929	0.999999	-0.0807812	0.538059	0.999998
cg10718614	1	234914480		LINC01132	1	14253547	-1.50157	1.9415e-05	0.0192377	0.0707384	0.82958	0.999996	-0.10555	0.73609	0.999987	-0.0399187	0.903305	0.999999	0.193252	0.537847	0.999998
cg03179442	2	85333991		TCF7L1	13	23383474	0.547184	1.98021e-05	0.0195127	-0.00955333	0.936486	0.999996	-0.0545954	0.633044	0.999987	0.0348513	0.771384	0.999999	-0.0873159	0.446097	0.999998
cg20953110	3	189766757	P3H2	P3H2	2	7796302	0.745161	1.98586e-05	0.0195127	0.0961701	0.55672	0.999996	0.0194159	0.900663	0.999987	0.11033	0.500434	0.999999	-0.155494	0.320369	0.999998
cg02245378	2	223161771	PAX3	PAX3	12	109746015	-1.66788	2.02248e-05	0.0197896	0.284002	0.439345	0.999996	0.0799041	0.818728	0.999987	-0.0584345	0.87314	0.999999	0.0128332	0.970629	0.999998
cg05952379	1	3103048	PRDM16	PRDM16	1	221334434	1.03454	2.03453e-05	0.0198249	0.17364	0.446041	0.999996	-0.106489	0.622964	0.999987	-0.316317	0.168527	0.999999	-0.0396659	0.854507	0.999998
cg23319460	11	65123510	TIGD3	TIGD3	14	9179185	0.958221	2.05311e-05	0.0198599	-0.0154936	0.941307	0.999996	0.0500935	0.802721	0.999987	0.312207	0.143144	0.999999	0.325585	0.109834	0.999998
cg07897248	18	49866531	DCC	DCC	18	30051513	1.98692	2.05504e-05	0.0198599	-0.33822	0.439961	0.999996	-0.156676	0.706454	0.999987	0.0511703	0.906657	0.999999	0.0977474	0.814136	0.999998
cg07059629	14	22314958		OR4E2	7	83862264	0.48108	2.07385e-05	0.0199596	0.0572251	0.58896	0.999996	0.251828	0.0158631	0.999987	0.0731707	0.490116	0.999999	-0.0432395	0.66798	0.999998
cg07607369	7	103180720	RELN	RELN	3	129849980	1.05763	2.11789e-05	0.0203003	-0.274443	0.242261	0.999996	-0.0492845	0.824113	0.999987	-0.339936	0.149291	0.999999	-0.0425855	0.847693	0.999998
cg14285365	1	36643743	MAP7D1	MAP7D1	1	188415055	0.99089	2.14064e-05	0.0203154	0.0461882	0.832399	0.999996	-0.201363	0.335373	0.999987	0.0586603	0.788141	0.999999	-0.0919913	0.658425	0.999998
cg25820728	7	1684706		TFAMP1	3	34723334	0.568875	2.13209e-05	0.0203154	-0.00703251	0.955219	0.999996	-0.277816	0.0240389	0.999987	0.0355237	0.776778	0.999999	0.154707	0.199206	0.999998
cg21692850	21	17944121	MIR99AHG	MIR99AHG	3	30278434	0.730167	2.14542e-05	0.0203154	0.0458873	0.775479	0.999996	-0.143064	0.352853	0.999987	0.138709	0.390518	0.999999	0.0271712	0.859228	0.999998
cg16278107	11	73053840	ARHGEF17	ARHGEF17	14	66366187	3.96489	2.15896e-05	0.0203615	-0.0845075	0.922938	0.999996	0.189186	0.820195	0.999987	0.414243	0.635821	0.999999	0.483071	0.562343	0.999998
cg24547636	6	17001350		STMND1	4	152972074	0.955324	2.18184e-05	0.0203835	0.0479267	0.820056	0.999996	-0.101444	0.613663	0.999987	-0.0743797	0.724187	0.999999	0.0143711	0.942896	0.999998
cg03938432	6	69345836	BAI3	ADGRB3	4	104155085	-1.1228	2.18734e-05	0.0203835	-0.144482	0.560338	0.999996	-0.0779863	0.74105	0.999987	-0.060171	0.808052	0.999999	0.0603175	0.798212	0.999998
cg02023402	7	82100675		CACNA2D1	3	123678843	1.02233	2.1745e-05	0.0203835	0.107285	0.634485	0.999996	0.147007	0.49466	0.999987	0.044007	0.845206	0.999999	-0.148421	0.490544	0.999998
cg11469533	16	2553178	TBC1D24	TBC1D24	20	2537887	-0.657569	2.22868e-05	0.0206868	0.081246	0.576466	0.999996	-0.0807459	0.560102	0.999987	0.376559	0.0125883	0.999999	0.0873407	0.528657	0.999998
cg18010014	15	98507208	ARRDC4	ARRDC4	7	77142138	0.838321	2.25361e-05	0.0208358	0.316536	0.0930654	0.999996	-0.0334474	0.849668	0.999987	-0.0705769	0.703423	0.999999	0.0208629	0.905875	0.999998
cg26891410	1	47696260	TAL1	TAL1	1	177273829	1.10538	2.27619e-05	0.020962	0.268438	0.275535	0.999996	-0.071048	0.760336	0.999987	0.048606	0.842386	0.999999	-0.1716	0.462504	0.999998
cg06228138	5	17317203		BASP1	6	17562070	-0.800252	2.31608e-05	0.0211723	0.0881578	0.619221	0.999996	0.0493132	0.770186	0.999987	-0.278858	0.120871	0.999999	-0.0724142	0.668125	0.999998
cg21248347	15	78568978	DNAJA4	DNAJA4	7	55520833	-1.32175	2.31705e-05	0.0211723	-0.0251712	0.93144	0.999996	0.000263036	0.999247	0.999987	0.233277	0.427037	0.999999	-0.0490921	0.86019	0.999998
cg02226199	18	73081523		SMIM21	18	4646603	0.474883	2.34119e-05	0.0213099	0.143654	0.176869	0.999996	-0.00357644	0.971525	0.999987	0.1098	0.299738	0.999999	0.0788557	0.432987	0.999998
cg12609498	1	158072911		KIRREL1	1	92894936	0.831581	2.40714e-05	0.0218256	-0.203041	0.274716	0.999996	-0.0344272	0.844749	0.999987	-0.134845	0.466386	0.999999	-0.0305029	0.86225	0.999998
cg03355909	3	5068374		BHLHE40	2	136326788	-1.43522	2.44357e-05	0.0220707	-0.182863	0.56701	0.999996	-0.215163	0.479934	0.999987	0.00121928	0.996948	0.999999	-0.00648444	0.982963	0.999998
cg12590521	12	121678474	CAMKK2	CAMKK2	11	121080256	-0.949064	2.4682e-05	0.0222078	-0.0529872	0.801744	0.999996	0.0385111	0.848039	0.999987	0.0684279	0.745805	0.999999	0.0933592	0.642633	0.999998
cg04100201	11	32459819	WT1-AS	WT1-AS	14	32989168	1.13836	2.49035e-05	0.0223215	-0.077457	0.759778	0.999996	-0.117394	0.626893	0.999987	-0.238813	0.348145	0.999999	0.0907558	0.706901	0.999998
cg02616023	1	162306972	NOS1AP	NOS1AP	1	88639226	-1.38508	2.53586e-05	0.0223755	0.17834	0.563888	0.999996	-1.40433	2.0546e-05	0.999987	-0.339629	0.274325	0.999999	-1.04468	0.000904991	0.999998
cg10205976	8	128845451		PVT1	8	128198254	0.873364	2.55303e-05	0.0223755	0.0699094	0.719561	0.999996	0.0227221	0.902423	0.999987	0.193067	0.323924	0.999999	0.0666426	0.719349	0.999998
cg07459967	9	130859191	SLC25A25	SLC25A25	15	12500043	0.828318	2.54171e-05	0.0223755	0.143768	0.437459	0.999996	-0.151059	0.392078	0.999987	-0.047623	0.79636	0.999999	0.0116399	0.947183	0.999998
cg18112431	13	49821843	CDADC1	CDADC1	17	27706587	-1.21355	2.52093e-05	0.0223755	-0.143154	0.596753	0.999996	0.0401368	0.87605	0.999987	-0.0681317	0.800934	0.999999	-0.0168809	0.947688	0.999998
cg23347094	19	15699028		CYP4F8	19	15195451	1.10367	2.52392e-05	0.0223755	-0.0291644	0.905512	0.999996	0.0453354	0.846419	0.999987	0.122189	0.619464	0.999999	-0.0537102	0.81852	0.999998
cg04785007	19	56369416	NLRP4	NLRP4	19	55616597	-1.04495	2.55355e-05	0.0223755	-0.118851	0.610223	0.999996	-0.0515093	0.816359	0.999987	-0.126574	0.587294	0.999999	-0.144346	0.516133	0.999998
cg17023149	4	13536504		LINC01097	5	12532355	-1.11591	2.56632e-05	0.0224039	0.155333	0.533175	0.999996	0.025851	0.913098	0.999987	-0.249881	0.317931	0.999999	-0.0109463	0.96314	0.999998
cg19850370	4	72205104	SLC4A4	SLC4A4	5	62459636	0.614749	2.5965e-05	0.0225001	-0.164117	0.235331	0.999996	0.221961	0.0947915	0.999987	0.00179837	0.989534	0.999999	0.0505197	0.69912	0.999998
cg01097995	17	64959947	CACNG4	CACNG4	16	63338845	0.644635	2.59183e-05	0.0225001	0.106786	0.459068	0.999996	-0.0449548	0.742827	0.999987	0.0665112	0.644014	0.999999	-0.105796	0.441374	0.999998
cg15803671	18	3457981	TGIF1	TGIF1	18	64676801	-1.29402	2.66102e-05	0.0229744	0.160022	0.580559	0.999996	-0.469575	0.0937085	0.999987	-0.553912	0.0607858	0.999999	-0.392638	0.158919	0.999998
cg24309107	15	100014553		LRRC28	7	78672101	1.12469	2.67828e-05	0.0230387	0.0509504	0.839396	0.999996	0.201448	0.402124	0.999987	0.19701	0.434855	0.999999	0.0960028	0.688704	0.999998
cg18605745	12	30353151		TMTC1	11	31523108	1.20208	2.70342e-05	0.0231701	0.0280428	0.916916	0.999996	0.0281028	0.912605	0.999987	0.177876	0.509271	0.999999	-0.337231	0.192438	0.999998
cg26521143	12	6402009		PLEKHG6	11	6423425	0.966094	2.75452e-05	0.0232476	-0.00258387	0.990469	0.999996	0.138885	0.501435	0.999987	0.0073167	0.973016	0.999999	0.464432	0.0286528	0.999998
cg09318204	6	35511434		FKBP5	4	133944158	-0.797257	2.76197e-05	0.0232476	-0.179853	0.316726	0.999996	0.221726	0.196864	0.999987	-0.172216	0.337468	0.999999	-0.0277271	0.8705	0.999998
cg10796060	12	104034835	STAB2	STAB2	11	103346096	0.954446	2.74991e-05	0.0232476	0.305423	0.157963	0.999996	-0.16004	0.4334	0.999987	-0.0851341	0.690591	0.999999	0.00696024	0.972719	0.999998
cg23877021	12	130953814	RIMBP2	RIMBP2	11	130304644	0.936911	2.75232e-05	0.0232476	0.122051	0.561462	0.999996	-0.139644	0.485896	0.999987	-0.19833	0.347012	0.999999	0.0417224	0.834627	0.999998
cg20603888	15	48470973	MYEF2	MYEF2	7	24596778	1.15407	2.75396e-05	0.0232476	0.101429	0.694924	0.999996	-0.023525	0.923854	0.999987	0.223753	0.388675	0.999999	-0.0973745	0.692645	0.999998
cg23787205	11	17801046	KCNC1	KCNC1	14	47856215	0.723121	2.78184e-05	0.0233313	0.198117	0.22556	0.999996	-0.00479591	0.975207	0.999987	-0.216519	0.186118	0.999999	-0.021778	0.887783	0.999998
cg17829936	6	132910681	TAAR5	TAAR5	4	36123836	-0.828043	2.7955e-05	0.0233492	0.253149	0.177363	0.999996	0.202089	0.256687	0.999987	-0.0819367	0.65921	0.999999	-0.0576588	0.744439	0.999998
cg01043383	19	57630742	USP29	USP29	19	56756814	-1.00201	2.80386e-05	0.0233492	0.281334	0.214703	0.999996	0.147544	0.491676	0.999987	0.0560923	0.802865	0.999999	-0.0178313	0.933579	0.999998
cg24041780	2	127730652		BIN1	12	3942128	0.835787	2.83662e-05	0.0235386	-0.0263019	0.88845	0.999996	0.13592	0.448218	0.999987	-0.0347835	0.852852	0.999999	0.00735921	0.967131	0.999998
cg14975429	2	182549604		NEUROD1	12	68776130	1.36256	2.93106e-05	0.0242366	0.244328	0.426904	0.999996	0.0488379	0.867098	0.999987	-0.203651	0.507326	0.999999	0.233593	0.425199	0.999998
cg10998440	11	86209638	ME3	ME3	14	79736033	0.564856	2.96018e-05	0.0243915	-0.13207	0.301838	0.999996	0.0927447	0.445179	0.999987	-0.033454	0.792437	0.999999	-0.082252	0.498014	0.999998
cg09481277	8	92260480	SLC26A7	SLC26A7	8	91629331	0.920343	2.97164e-05	0.0244003	0.144398	0.486958	0.999996	-0.0924307	0.639842	0.999987	0.0245143	0.905785	0.999999	0.198194	0.31802	0.999998
cg06627354	2	234891753	TRPM8	TRPM8	12	121428036	-0.923758	3.00845e-05	0.0246165	0.00269659	0.989658	0.999996	0.234453	0.240743	0.999987	0.200537	0.337821	0.999999	-0.0334262	0.866073	0.999998
cg17455297	1	2723217		TTC34	1	221712355	1.03178	3.05599e-05	0.0249098	0.0607658	0.794001	0.999996	-0.0892574	0.687362	0.999987	-0.263078	0.261772	0.999999	0.0811283	0.714478	0.999998
cg25368667	1	26675790		CRYBG2	1	198441131	0.607485	3.06552e-05	0.0249098	-0.120762	0.380275	0.999996	0.00185349	0.988667	0.999987	0.00982489	0.942826	0.999999	0.0447259	0.731955	0.999998
cg03147310	4	71996699		SLC4A4	5	62661769	-0.86885	3.0911e-05	0.0250311	0.494018	0.0151292	0.999996	0.365809	0.0554801	0.999987	0.0614353	0.754127	0.999999	0.183331	0.329025	0.999998
cg00675009	2	230198349		DNER	12	116755866	-0.882667	3.12223e-05	0.0251963	0.225355	0.26183	0.999996	0.119787	0.529017	0.999987	0.152805	0.444857	0.999999	-0.0990158	0.602539	0.999998
cg11717597	1	156046546	MEX3A	MEX3A	1	94894955	-0.879401	3.18949e-05	0.0256509	-0.0613754	0.757704	0.999996	0.0249768	0.895092	0.999987	-0.0644577	0.745961	0.999999	-0.027052	0.886434	0.999998
cg24893551	2	158453759	ACVR1C	ACVR1C	12	44674371	-1.08567	3.28233e-05	0.0263075	0.0687495	0.779941	0.999996	0.0707577	0.762752	0.999987	-0.0850145	0.729787	0.999999	0.239331	0.310035	0.999998
cg09940861	14	101201649		DLK1	7	162951909	0.732334	3.3439e-05	0.0267098	-0.0852705	0.608297	0.999996	-0.0416432	0.792489	0.999987	0.130473	0.433919	0.999999	-0.115378	0.467323	0.999998
cg15497006	1	27147585		ZDHHC18	1	197946966	-0.967309	3.5214e-05	0.0276209	-0.0630946	0.774561	0.999996	0.133331	0.525969	0.999987	-0.102816	0.640971	0.999999	-0.158619	0.451041	0.999998
cg25840354	4	38784158	TLR10	TLR10	5	37920893	0.665478	3.47231e-05	0.0276209	0.0793885	0.600479	0.999996	0.300034	0.042455	0.999987	0.223866	0.144299	0.999999	0.0215833	0.880993	0.999998
cg14514032	2	74725206	LBX2	LBX2	13	34317970	-2.38879	3.53633e-05	0.0276209	-0.299653	0.582379	0.999996	-0.729005	0.164385	0.999987	-0.00561441	0.991764	0.999999	-0.236997	0.647762	0.999998
cg08197461	7	55124502	EGFR	EGFR	3	60215734	0.568737	3.52478e-05	0.0276209	0.041004	0.751606	0.999996	-0.060844	0.622255	0.999987	-0.0626112	0.629152	0.999999	-0.131123	0.290961	0.999998
cg08980461	9	124413513	DAB2IP	DAB2IP	15	21050104	-0.401114	3.54029e-05	0.0276209	-0.0298267	0.74416	0.999996	0.0559965	0.52086	0.999987	0.0669905	0.464749	0.999999	0.0929771	0.288538	0.999998
cg23911709	12	131479185	LACAT8	ADGRD1	11	130840485	0.754145	3.53254e-05	0.0276209	0.0877692	0.609792	0.999996	0.24279	0.142914	0.999987	0.0740434	0.666647	0.999999	-0.0784472	0.631942	0.999998
cg02833950	17	43853589	MGC57346-CRHR1	CRHR1	16	57573053	0.795292	3.49772e-05	0.0276209	-0.0807469	0.655805	0.999996	0.0576835	0.738035	0.999987	0.129765	0.474664	0.999999	-0.0658687	0.702583	0.999998
cg23015920	1	4830444	AJAP1	AJAP1	1	219747158	0.813398	3.7968e-05	0.0277235	0.112597	0.546056	0.999996	0.0782442	0.659304	0.999987	0.0747319	0.688293	0.999999	-0.0607409	0.73204	0.999998
cg19274341	1	8143891		ERRFI1	1	216435144	-0.646663	3.68626e-05	0.0277235	0.0218363	0.882446	0.999996	0.0536826	0.70294	0.999987	-0.0904563	0.541054	0.999999	-0.0295719	0.833507	0.999998
cg00781085	2	46875429		CRIPT	13	62150418	0.816959	3.58805e-05	0.0277235	0.269785	0.1525	0.999996	-0.179715	0.313931	0.999987	-0.116992	0.530782	0.999999	0.0644736	0.716428	0.999998
cg10196696	5	157247843	CLINT1	CLINT1	6	155244427	-0.692997	3.70258e-05	0.0277235	-0.323616	0.0460651	0.999996	0.148953	0.326036	0.999987	-0.00661044	0.966687	0.999999	0.122175	0.419594	0.999998
cg11266242	19	17013435	CPAMD8	CPAMD8	19	16410598	0.587308	3.72105e-05	0.0277235	0.10599	0.43136	0.999996	0.312551	0.0181761	0.999987	0.0444542	0.740598	0.999999	-0.145958	0.257235	0.999998
cg15772216	3	63264919	SYNPR	SYNPR	2	119439264	-0.874039	3.62013e-05	0.0277235	0.0844227	0.672238	0.999996	-0.17195	0.367508	0.999987	0.15858	0.428058	0.999999	0.111895	0.556464	0.999998
cg16079012	3	143099960	SLC9A9	SLC9A9	2	45511546	0.863231	3.63737e-05	0.0277235	-0.0228305	0.907711	0.999996	0.143797	0.444943	0.999987	-0.00809088	0.967227	0.999999	0.144716	0.442061	0.999998
cg08670693	4	41162197	APBB2	APBB2	5	40324679	-1.21202	3.70921e-05	0.0277235	0.0918185	0.740329	0.999996	0.348582	0.19089	0.999987	0.402522	0.15114	0.999999	0.184184	0.486213	0.999998
cg21487099	5	1201608	SLC6A19	SLC6A19	6	1158111	0.912996	3.80047e-05	0.0277235	0.0416086	0.842161	0.999996	0.108218	0.587218	0.999987	0.0468466	0.822615	0.999999	-0.0288826	0.884606	0.999998
cg00104845	5	140892370	PCDHGB5	PCDHGA8	6	138890572	-4.09757	3.81317e-05	0.0277235	0.651707	0.48837	0.999996	0.249968	0.779701	0.999987	-0.532373	0.570999	0.999999	-0.706713	0.430604	0.999998
cg08268114	6	13492509		GFOD1	4	156501453	0.732986	3.62225e-05	0.0277235	-0.164312	0.328482	0.999996	0.123638	0.439144	0.999987	0.115497	0.490883	0.999999	-0.105416	0.509077	0.999998
cg03034365	6	31105872	PSORS1C1	PSORS1C2	4	138794075	1.40143	3.75232e-05	0.0277235	0.342922	0.287811	0.999996	0.204556	0.503835	0.999987	0.150834	0.638242	0.999999	0.144965	0.635231	0.999998
cg03631656	8	6420770	ANGPT2	MCPH1	8	7301041	-0.977144	3.74466e-05	0.0277235	-0.126991	0.570412	0.999996	-0.0816553	0.701373	0.999987	0.0226451	0.919248	0.999999	-0.122952	0.564112	0.999998
cg08189448	9	118915907	PAPPA	PAPPA	15	26660661	0.663845	3.59554e-05	0.0277235	0.11415	0.452205	0.999996	-0.0392757	0.785338	0.999987	0.118067	0.436948	0.999999	-0.113441	0.432992	0.999998
cg05583417	10	4077151		KLF6	9	5194581	0.698106	3.78196e-05	0.0277235	-0.0947425	0.553815	0.999996	-0.078963	0.604245	0.999987	-0.23388	0.148201	0.999999	-0.0931193	0.54131	0.999998
cg05625526	10	49653080		ARHGAP22	9	48924147	-0.705409	3.74867e-05	0.0277235	-0.0137144	0.932225	0.999996	0.138298	0.37027	0.999987	0.134854	0.404994	0.999999	-0.00434379	0.977438	0.999998
cg01322975	10	118031256	GFRA1	GFRA1	9	116766564	0.965725	3.66001e-05	0.0277235	0.0847335	0.700899	0.999996	0.104203	0.620166	0.999987	0.142224	0.519795	0.999999	0.140314	0.505058	0.999998
cg07973908	12	99478667	ANKS1B	ANKS1B	11	98866424	0.53117	3.65989e-05	0.0277235	0.100005	0.411338	0.999996	-0.0171506	0.881939	0.999987	0.00746012	0.95093	0.999999	0.0673465	0.560542	0.999998
cg03613339	16	86602339	FOXC2	FOXC2	20	73580634	0.934393	3.69214e-05	0.0277235	-0.0805883	0.70591	0.999996	0.067858	0.738645	0.999987	0.121391	0.570182	0.999999	0.11641	0.567584	0.999998
cg00264994	17	47991806		DLX4	16	46870888	-0.611357	3.80512e-05	0.0277235	-0.000230366	0.998686	0.999996	0.0939971	0.481892	0.999987	-0.0103139	0.94123	0.999999	-0.0203782	0.878472	0.999998
cg03146377	19	6230665	MLLT1	MLLT1	19	6165694	-0.573633	3.78372e-05	0.0277235	0.106713	0.417933	0.999996	0.0238239	0.848858	0.999987	0.0123828	0.924818	0.999999	0.0335503	0.788451	0.999998
cg09006386	19	41112158	LTBP4	LTBP4	19	39831394	0.79847	3.6312e-05	0.0277235	0.222132	0.226774	0.999996	0.07791	0.653761	0.999987	0.296375	0.109221	0.999999	0.0605025	0.727468	0.999998
cg23895340	2	176973275	HOXD11	HOXD11	12	63222829	1.30442	3.90425e-05	0.0282981	-0.0786483	0.792617	0.999996	-0.0733957	0.796723	0.999987	-0.162353	0.58783	0.999999	0.0102034	0.971423	0.999998
cg15678662	1	2465544		HES5	1	221867850	0.643125	4.04191e-05	0.0284347	-0.119816	0.419348	0.999996	-0.016811	0.904942	0.999987	0.161515	0.277886	0.999999	-0.136539	0.334804	0.999998
cg08898653	1	20811220	CAMK2N1	CAMK2N1	1	204243609	1.73462	3.98603e-05	0.0284347	-0.134983	0.734798	0.999996	-0.101507	0.789078	0.999987	-0.690618	0.0884658	0.999999	-0.108541	0.774856	0.999998
cg27639613	2	28408263	BRE	BABAM2	13	80762566	0.738443	3.95769e-05	0.0284347	-0.0997706	0.556797	0.999996	-0.125523	0.438391	0.999987	-0.115674	0.496013	0.999999	-0.0200186	0.901292	0.999998
cg14311670	3	181444999	SOX2OT	SOX2-OT	2	86988734	-0.958322	4.05629e-05	0.0284347	-0.0304979	0.889884	0.999996	0.100051	0.633909	0.999987	-0.127909	0.562226	0.999999	0.192829	0.360501	0.999998
cg08950106	6	126262119		NCOA7	4	29463946	0.645328	4.03217e-05	0.0284347	-0.0679326	0.647226	0.999996	0.136531	0.336385	0.999987	0.118637	0.425399	0.999999	-0.0974944	0.491215	0.999998
cg15027328	8	35452489	UNC5D	UNC5D	8	35998414	0.582162	4.02418e-05	0.0284347	0.00449933	0.97316	0.999996	0.128077	0.317634	0.999987	0.0345578	0.796164	0.999999	-0.0555653	0.663041	0.999998
cg24930906	9	77230509	RORB	RORB	15	90043915	0.754349	4.01164e-05	0.0284347	0.0140792	0.935231	0.999996	-0.118021	0.475861	0.999987	0.0974435	0.574538	0.999999	-0.0514976	0.755124	0.999998
cg02385723	11	86347215	ME3	ME3	14	79868005	0.627918	3.97354e-05	0.0284347	0.174869	0.22911	0.999996	-0.0316868	0.8175	0.999987	-0.0175588	0.903034	0.999999	0.00227778	0.986761	0.999998
cg23944420	11	126276079	ST3GAL4	ST3GAL4	14	119179645	0.837752	4.05378e-05	0.0284347	0.207262	0.285095	0.999996	0.160553	0.383549	0.999987	-0.0504024	0.793573	0.999999	0.142815	0.437833	0.999998
cg14070323	14	101291856	MEG3	MEG3	7	163044241	1.48977	3.94607e-05	0.0284347	-0.0213535	0.95018	0.999996	0.178074	0.585041	0.999987	-0.068428	0.841342	0.999999	0.00539936	0.986766	0.999998
cg27214170	22	27884956		MN1	10	24069890	0.752349	3.97888e-05	0.0284347	0.0260388	0.88016	0.999996	0.0820703	0.618351	0.999987	-0.0315105	0.855241	0.999999	0.0864083	0.599976	0.999998
cg13541977	10	63805971	ARID5B	ARID5B	9	75936638	-1.13807	4.07228e-05	0.0284619	-0.00400776	0.987778	0.999996	0.0980517	0.694267	0.999987	0.00697181	0.978741	0.999999	-0.160957	0.519437	0.999998
cg03665271	2	119605279	EN1	EN1	12	12267648	-1.19314	4.08532e-05	0.0284683	-0.179665	0.513665	0.999996	0.204991	0.434526	0.999987	0.114694	0.676241	0.999999	0.0983036	0.707037	0.999998
cg14911520	15	100542628	ADAMTS17	ADAMTS17	7	79331180	0.663846	4.10317e-05	0.028508	0.151086	0.325318	0.999996	0.155809	0.28741	0.999987	0.184492	0.231067	0.999999	0.0736926	0.612943	0.999998
cg08067023	16	72118960	TXNL4B	TXNL4B	20	59426917	-0.719318	4.13349e-05	0.028634	0.205347	0.219075	0.999996	0.13157	0.406038	0.999987	-0.132023	0.426934	0.999999	-0.0797555	0.613544	0.999998
cg12965599	3	147125924	ZIC1	ZIC1	2	49541021	1.01359	4.15222e-05	0.0286791	-0.173904	0.457611	0.999996	0.405215	0.0738476	0.999987	0.0419615	0.857309	0.999999	-0.082806	0.709699	0.999998
cg22241045	4	54363911	LNX1	LNX1	5	80142889	0.814495	4.17658e-05	0.0286812	0.0205082	0.912945	0.999996	-0.134204	0.454127	0.999987	-0.0053903	0.977075	0.999999	0.0202412	0.909808	0.999998
cg16250833	20	33917755	UQCC1	GDF5	10	70540733	-0.948083	4.17694e-05	0.0286812	0.109096	0.617854	0.999996	-0.134467	0.518988	0.999987	-0.193815	0.377011	0.999999	0.266682	0.204223	0.999998
cg09835239	11	66188203	NPAS4	NPAS4	14	8137356	1.51615	4.20248e-05	0.0287724	0.189288	0.588566	0.999996	0.0261115	0.93745	0.999987	0.4309	0.221609	0.999999	0.12011	0.718323	0.999998
cg11740770	9	114049606		OR2K2	15	31613584	0.955345	4.21664e-05	0.0287855	0.0357349	0.871078	0.999996	0.239774	0.25664	0.999987	0.228075	0.303371	0.999999	0.0713789	0.733752	0.999998
cg14049008	10	23425818		MSRB2	9	106241266	-0.868647	4.25876e-05	0.0289887	-0.0944251	0.637826	0.999996	0.0523723	0.783811	0.999987	0.143335	0.475654	0.999999	0.0562843	0.768125	0.999998
cg20413471	5	128796079	ADAMTS19	ADAMTS19	6	126928068	-3.13076	4.32656e-05	0.0293651	0.88415	0.225411	0.999996	-0.375543	0.586095	0.999987	-0.0847501	0.906663	0.999999	-0.270543	0.69461	0.999998
cg11349423	11	133232657	OPCML	OPCML	14	125983399	1.09143	4.36988e-05	0.0295736	0.149726	0.553488	0.999996	0.249638	0.301775	0.999987	0.232689	0.358574	0.999999	-0.158174	0.511274	0.999998
cg15034135	5	128796168	ADAMTS19	ADAMTS19	6	126928157	-1.63623	4.39833e-05	0.0296806	-0.172302	0.649076	0.999996	-0.0647527	0.857366	0.999987	0.177909	0.638489	0.999999	0.157056	0.663196	0.999998
cg06213047	16	85229676		LINC02139	20	72225364	0.764579	4.44228e-05	0.0298913	0.00934861	0.957838	0.999996	-0.0783403	0.642297	0.999987	-0.0161966	0.927025	0.999999	-0.0869634	0.606233	0.999998
cg12706947	11	132921195	OPCML	OPCML	14	125667477	1.00948	4.50525e-05	0.0301667	0.00899565	0.969296	0.999996	-0.0506157	0.820185	0.999987	0.300663	0.20276	0.999999	0.154302	0.489481	0.999998
cg01867652	13	81125459		SPRY2	17	62374089	0.801697	4.51771e-05	0.0301667	0.0818178	0.659774	0.999996	0.0393032	0.824149	0.999987	-0.219266	0.241504	0.999999	-0.0142485	0.935777	0.999998
cg02848329	19	36673729	ZNF565	ZNF565	19	35599928	0.701445	4.52174e-05	0.0301667	-0.0480054	0.767699	0.999996	-0.00435842	0.977526	0.999987	-0.00121125	0.99405	0.999999	-0.047881	0.757099	0.999998
cg26517721	19	32086763		THEG5	19	31045216	1.15915	4.53461e-05	0.0301668	0.164015	0.542172	0.999996	-0.147107	0.565904	0.999987	0.246434	0.361126	0.999999	0.0712765	0.780557	0.999998
cg24398061	10	102626652		PAX2	9	101338139	0.758276	4.54836e-05	0.0301729	-0.0241443	0.89069	0.999996	0.071871	0.667884	0.999987	-0.0435053	0.804466	0.999999	0.00734591	0.964982	0.999998
cg17752395	3	118688312	IGSF11	IGSF11	2	157291807	1.17865	4.59757e-05	0.030243	-0.238852	0.384271	0.999996	0.225043	0.389401	0.999987	0.265113	0.334705	0.999999	0.0764708	0.769023	0.999998
cg06046705	4	125634632	ANKRD50	ANKRD50	5	122498235	-0.945176	4.58594e-05	0.030243	-0.211165	0.337852	0.999996	-0.0136935	0.947682	0.999987	-0.1651	0.452663	0.999999	0.107473	0.607131	0.999998
cg22535729	8	55533955	RP1	RP1	8	55229813	0.808794	4.57587e-05	0.030243	0.224361	0.235379	0.999996	-0.147721	0.409983	0.999987	-0.127597	0.497268	0.999999	-0.0852494	0.6335	0.999998
cg14562755	4	126282938	FAT4	FAT4	5	123151663	0.830901	4.65747e-05	0.030491	-0.286168	0.142996	0.999996	0.0169624	0.926413	0.999987	0.280029	0.151547	0.999999	-0.243612	0.189354	0.999998
cg27228433	16	71475716		ZNF23	20	60079479	-1.47053	4.66124e-05	0.030491	-0.344706	0.315427	0.999996	-0.159183	0.624832	0.999987	-0.28991	0.397642	0.999999	-0.395465	0.227889	0.999998
cg23213872	1	242613203	PLD5	PLD5	1	6630033	-0.700695	4.68253e-05	0.0305242	0.298077	0.0724298	0.999996	-0.101394	0.51392	0.999987	0.0995812	0.541309	0.999999	-0.0875491	0.57276	0.999998
cg00720829	6	30131219	TRIM15	TRIM15	4	139734792	0.791604	4.69232e-05	0.0305242	0.0600745	0.743919	0.999996	0.00120264	0.994519	0.999987	0.132001	0.473997	0.999999	0.14302	0.415825	0.999998
cg15627464	12	124985655	NCOR2	NCOR2	11	124403724	0.74646	4.73976e-05	0.0307477	0.0414531	0.811147	0.999996	-0.0488439	0.767589	0.999987	0.0410216	0.813075	0.999999	0.103625	0.53144	0.999998
cg07452586	9	95485706	BICD2	BICD2	15	107818849	1.01939	4.8242e-05	0.0312093	-0.0508036	0.830398	0.999996	0.0631324	0.779951	0.999987	-0.00605001	0.979645	0.999999	-0.0766274	0.73459	0.999998
cg00167275	10	88854588	FAM35A	GLUD1	12	84723754	1.33486	4.85263e-05	0.0313069	-0.0270207	0.930685	0.999996	0.218595	0.461529	0.999987	-0.234528	0.451823	0.999999	0.187263	0.527812	0.999998
cg10237479	6	42858959	C6orf226	C6orf226	4	126455188	-1.04395	4.91728e-05	0.0315507	-0.100192	0.680624	0.999996	-0.185768	0.42434	0.999987	0.0152119	0.950119	0.999999	-0.147162	0.526206	0.999998
cg04862197	7	158334358	PTPRN2	PTPRN2	3	184494733	0.825683	4.91308e-05	0.0315507	-0.0979004	0.611263	0.999996	0.125219	0.495463	0.999987	0.0109159	0.954735	0.999999	-0.0343713	0.851191	0.999998
cg08508227	20	61162102	C20orf166	MIR1-1HG	10	97719229	0.589944	4.94744e-05	0.0316577	-0.089852	0.514461	0.999996	0.030517	0.815778	0.999987	-0.0896967	0.515185	0.999999	0.0402749	0.75854	0.999998
cg06157941	3	1133028	CNTN6	CNTN6	2	132423098	1.04562	4.9936e-05	0.0318662	0.051007	0.834331	0.999996	0.0464931	0.841364	0.999987	-0.0852975	0.726648	0.999999	-0.0113209	0.961121	0.999998
cg00344209	1	43471256		SLC2A1-AS1	1	181547677	0.585216	5.13993e-05	0.032099	0.114942	0.402587	0.999996	0.0803215	0.53837	0.999987	-0.0780352	0.568968	0.999999	0.0196384	0.880162	0.999998
cg21961202	1	145455384		NBPF20	1	103302808	-0.719933	5.06779e-05	0.032099	-0.128855	0.444837	0.999996	0.104512	0.514891	0.999987	0.263544	0.122259	0.999999	-0.0928435	0.562692	0.999998
cg04307688	2	85538759		TCF7L1	13	23172711	0.968418	5.11211e-05	0.032099	0.184727	0.415985	0.999996	-0.118419	0.58325	0.999987	-0.0473185	0.834331	0.999999	0.0256767	0.90514	0.999998
cg12119951	3	143033370	SLC9A9	SLC9A9	2	45444228	0.795479	5.13747e-05	0.032099	0.0470785	0.800107	0.999996	-0.0257849	0.88421	0.999987	0.164688	0.37784	0.999999	0.024815	0.888536	0.999998
cg26353476	6	85592761		TBX18	4	88374310	1.00861	5.13797e-05	0.032099	0.179238	0.448495	0.999996	0.345819	0.128794	0.999987	-0.070625	0.764531	0.999999	0.0830507	0.711614	0.999998
cg15067350	13	66878738	PCDH9	PCDH9	17	47706571	1.26521	5.13154e-05	0.032099	0.0854897	0.77252	0.999996	-0.144245	0.608991	0.999987	0.0872354	0.768011	0.999999	-0.352127	0.215371	0.999998
cg02948314	15	79339307	RASGRF1	RASGRF1	7	56351993	0.636357	5.14529e-05	0.032099	0.0329327	0.82477	0.999996	0.217184	0.130549	0.999987	0.027317	0.854268	0.999999	-0.00158039	0.991097	0.999998
cg03671700	16	62068673	CDH8	CDH8	20	49227977	-1.30954	5.06635e-05	0.032099	-0.0699255	0.819106	0.999996	0.117767	0.686147	0.999987	0.0835397	0.784712	0.999999	-0.144768	0.619554	0.999998
cg21669679	18	49866548	DCC	DCC	18	30051496	1.19611	5.1531e-05	0.032099	-0.051549	0.853713	0.999996	0.212675	0.426213	0.999987	-0.0509983	0.855258	0.999999	0.0258284	0.922723	0.999998
cg09117778	1	209381617		MIR205HG	1	66703032	1.78329	5.2222e-05	0.0324381	0.207802	0.618893	0.999996	0.128232	0.747045	0.999987	0.340917	0.415659	0.999999	0.291005	0.465375	0.999998
cg26034770	7	27071294		SKAP2	3	88074749	0.671364	5.24897e-05	0.0324381	0.0386915	0.805524	0.999996	0.0240159	0.872509	0.999987	-0.0674457	0.668032	0.999999	-0.118057	0.431878	0.999998
cg14269973	13	46425904	SIAH3	SIAH3	17	24350528	-0.808975	5.24104e-05	0.0324381	-0.0624239	0.741711	0.999996	-0.00861609	0.961883	0.999987	0.028075	0.882097	0.999999	-0.195947	0.280541	0.999998
cg03513571	2	3691618	COLEC11	COLEC11	13	105137192	0.820465	5.28958e-05	0.0325179	-0.0422084	0.826127	0.999996	0.0884742	0.629191	0.999987	-0.126795	0.510322	0.999999	-0.308778	0.0970811	0.999998
cg03162251	19	6230240	MLLT1	MLLT1	19	6165269	-1.13785	5.28653e-05	0.0325179	-0.0230048	0.931183	0.999996	0.125071	0.622584	0.999987	-0.129857	0.626416	0.999999	-0.176136	0.488849	0.999998
cg19604703	4	16261642		TAPT1-AS1	5	15261147	1.13929	5.32697e-05	0.0325873	0.177487	0.50714	0.999996	-0.0617707	0.808065	0.999987	-0.00665077	0.980117	0.999999	0.171646	0.5007	0.999998
cg02255236	5	168199824	SLIT3	SLIT3	6	166174178	1.12735	5.32862e-05	0.0325873	-0.0622315	0.813757	0.999996	0.037957	0.880069	0.999987	-0.0422178	0.873001	0.999999	-0.0171333	0.945695	0.999998
cg06440087	10	7745191	ITIH2	ITIH2	9	8799499	0.896999	5.41039e-05	0.0330014	-0.162324	0.441938	0.999996	-0.144093	0.473415	0.999987	0.147701	0.483868	0.999999	0.0735504	0.713765	0.999998
cg22160612	22	45705042	FAM118A	FAM118A	10	6185545	-0.655933	5.53552e-05	0.0336772	-0.0856574	0.578927	0.999996	-0.228572	0.124752	0.999987	0.0301324	0.844967	0.999999	0.00387113	0.978954	0.999998
cg23218397	1	216019172	USH2A	USH2A	1	73347015	1.13879	5.59886e-05	0.0337996	0.186894	0.486357	0.999996	-0.0263684	0.917638	0.999987	0.222094	0.408685	0.999999	-0.105565	0.679176	0.999998
cg12326699	1	240400726	FMN2	FMN2	1	8830944	-0.826351	5.57466e-05	0.0337996	0.0699242	0.718989	0.999996	-0.286541	0.126749	0.999987	0.303801	0.123139	0.999999	-0.0921671	0.618804	0.999998
cg04350136	6	30616105	C6orf136	C6orf136	4	139264926	0.592068	5.60148e-05	0.0337996	0.139229	0.320069	0.999996	-0.0890366	0.502995	0.999987	0.141107	0.313665	0.999999	0.129498	0.331453	0.999998
cg10557015	18	53090620	TCF4	TCF4	18	24769415	1.28528	5.61321e-05	0.0337996	0.0553707	0.854637	0.999996	-0.0717205	0.803293	0.999987	0.216728	0.474618	0.999999	0.283133	0.328108	0.999998
cg23935420	11	65123609	TIGD3	TIGD3	14	9179086	0.691767	5.76157e-05	0.0343636	0.00682476	0.96659	0.999996	0.0595365	0.701522	0.999987	0.209506	0.203007	0.999999	0.318532	0.0452767	0.999998
cg08907819	7	70255804	AUTS2	AUTS2	3	50960176	-1.37557	5.75134e-05	0.0343636	0.380711	0.243855	0.999996	-0.0104948	0.972869	0.999987	0.199222	0.539516	0.999999	0.0375269	0.903213	0.999998
cg18963392	14	29859306		MIR548AI	7	91477323	1.21195	5.76541e-05	0.0343636	-0.142996	0.616975	0.999996	0.14333	0.598739	0.999987	0.127381	0.655836	0.999999	-0.021281	0.937621	0.999998
cg10067062	21	44086302	PDE9A	PDE9A	3	3996746	0.960603	5.7431e-05	0.0343636	0.387029	0.0926978	0.999996	0.194003	0.370276	0.999987	0.0185446	0.934664	0.999999	0.0647918	0.763765	0.999998
cg04902729	1	181452707	CACNA1E	CACNA1E	1	38697767	1.12983	5.79437e-05	0.0344488	-0.231348	0.387035	0.999996	-0.13029	0.607975	0.999987	-0.0855033	0.748235	0.999999	0.0962097	0.704638	0.999998
cg17331554	14	105167820	INF2	INF2	7	167030176	-0.798027	5.827e-05	0.0345553	0.130356	0.48961	0.999996	-0.181129	0.315089	0.999987	-0.007437	0.968465	0.999999	-0.00385842	0.98282	0.999998
cg15655001	6	53013566	GCM1	GCM1	4	116452729	0.514179	5.85734e-05	0.0345708	-0.0449586	0.711024	0.999996	-0.0281835	0.807277	0.999987	0.0328652	0.786444	0.999999	-0.0589692	0.61021	0.999998
cg16847267	11	27444868	LGR4	LGR4	14	38028674	0.758855	5.85906e-05	0.0345708	-0.238907	0.186583	0.999996	0.080065	0.639011	0.999987	0.0833148	0.641964	0.999999	-0.00272327	0.987253	0.999998
cg06166809	5	94956900	GPR150	GPR150	6	92479009	-0.772515	5.90407e-05	0.0347214	-0.162876	0.373867	0.999996	-0.0346978	0.841634	0.999987	-0.0101948	0.955397	0.999999	-0.0233504	0.893024	0.999998
cg18462631	9	134609865	RAPGEF1	RAPGEF1	15	8685159	-0.797829	5.91414e-05	0.0347214	-0.0878506	0.641212	0.999996	-0.0385914	0.829658	0.999987	-0.0383162	0.838769	0.999999	-0.169511	0.347149	0.999998
cg26307218	2	121200256		LINC01101	12	10654229	-0.83471	5.93525e-05	0.0347584	0.139472	0.480348	0.999996	0.0101181	0.957003	0.999987	-0.0413089	0.833971	0.999999	-0.00604275	0.974313	0.999998
cg15079315	20	4981089	SLC23A2	SLC23A2	10	61474617	-1.82693	5.97221e-05	0.0348878	-0.18905	0.661604	0.999996	0.0478043	0.907396	0.999987	0.241348	0.57659	0.999999	-0.0213253	0.958612	0.999998
cg11959896	4	649276	PDE6B	PDE6B	5	656017	0.720562	5.98983e-05	0.0349039	0.154704	0.365754	0.999996	0.180947	0.267943	0.999987	-0.0809749	0.63469	0.999999	-0.0438228	0.786998	0.999998
cg17175208	1	6241179	CHD5	CHD5	1	218348573	1.84529	6.08324e-05	0.0353323	0.431611	0.325437	0.999996	0.393158	0.346773	0.999987	0.102743	0.813898	0.999999	0.416864	0.318798	0.999998
cg22437645	4	186802774	SORBS2	SORBS2	5	183163098	0.8906	6.09343e-05	0.0353323	0.0596404	0.777142	0.999996	-0.175063	0.385049	0.999987	-0.278027	0.191446	0.999999	-0.0372268	0.852811	0.999998
cg14249155	9	124976040	LHX6	LHX6	15	20497224	0.592941	6.21881e-05	0.0359704	-0.0971511	0.490297	0.999996	0.0842453	0.529788	0.999987	0.0206051	0.883354	0.999999	-0.0615854	0.645629	0.999998
cg07259507	7	97978189	BAIAP2L1	BAIAP2L1	3	40430320	-0.649725	6.35142e-05	0.0365898	-0.0514166	0.738811	0.999996	0.157888	0.285465	0.999987	-0.0744853	0.629335	0.999999	-0.0391466	0.789792	0.999998
cg24723756	17	9131941	NTN1	NTN1	16	9024111	0.886129	6.35704e-05	0.0365898	0.0781205	0.710367	0.999996	-0.15632	0.436624	0.999987	-0.20615	0.329517	0.999999	0.0223851	0.91098	0.999998
cg17478992	3	124873768	SLC12A8	SLC12A8	2	151164369	0.0845703	0.502629	0.996051	0.784105	4.68794e-07	0.0366966	0.0680095	0.589465	0.999987	0.112104	0.398093	0.999999	-0.127802	0.31274	0.999998
cg24433124	6	30755968		IER3	4	139127814	-1.14232	6.3948e-05	0.0367171	-0.0203593	0.940131	0.999996	0.0712045	0.782817	0.999987	-0.450851	0.101844	0.999999	-0.183369	0.478938	0.999998
cg01877450	7	97915802	BRI3	BRI3	3	40364161	0.669443	6.41898e-05	0.0367661	-0.326221	0.0452145	0.999996	-0.0741373	0.624762	0.999987	-0.129828	0.415799	0.999999	-0.103281	0.496221	0.999998
cg23368285	11	69633967	FGF3	FGF3	14	4989373	-1.06225	6.44437e-05	0.0368216	-0.0886378	0.725449	0.999996	-0.03066	0.898453	0.999987	-0.171005	0.498953	0.999999	-0.0761714	0.751333	0.999998
cg15721436	3	84928932		LINC00971	2	187125217	0.647181	6.49342e-05	0.036847	0.116321	0.45087	0.999996	-0.0815239	0.578451	0.999987	0.0639952	0.677547	0.999999	-0.0967204	0.510078	0.999998
cg13341412	6	124151453	NKAIN2	NKAIN2	4	27371191	0.811377	6.49587e-05	0.036847	0.142371	0.461627	0.999996	-0.043447	0.812998	0.999987	0.183311	0.34425	0.999999	0.0777626	0.672236	0.999998
cg02526439	8	89053427	MMP16	MMP16	8	88417409	0.927211	6.47488e-05	0.036847	0.124945	0.571223	0.999996	-0.194232	0.356976	0.999987	0.0796761	0.717714	0.999999	-0.0495123	0.813463	0.999998
cg08414108	6	158438202	SYNJ2	SYNJ2	4	64354143	-0.976755	6.5256e-05	0.0368806	0.0511212	0.825734	0.999996	0.296333	0.184885	0.999987	-0.180586	0.43826	0.999999	-0.160167	0.470225	0.999998
cg02703870	16	82045140	SDR42E1	SDR42E1	20	69030474	0.978934	6.53321e-05	0.0368806	0.0314295	0.892551	0.999996	-0.0304797	0.890616	0.999987	-0.269649	0.250299	0.999999	0.00639136	0.976991	0.999998
cg22714290	1	207992548	LOC148696	LOC148696	1	65316107	-1.60652	6.55935e-05	0.0369394	-0.0333966	0.93032	0.999996	0.165728	0.649111	0.999987	0.195335	0.609598	0.999999	0.0317472	0.930459	0.999998
cg01844321	20	35490815	C20orf117	SOGA1	10	72131015	-0.941064	6.59251e-05	0.0370373	-0.0742349	0.74028	0.999996	0.0427348	0.84115	0.999987	0.320979	0.1566	0.999999	-0.10606	0.619341	0.999998
cg25518302	16	30483961	ITGAL	ITGAL	20	27878997	-0.529793	6.68908e-05	0.0374901	0.00252668	0.984017	0.999996	0.0933135	0.438998	0.999987	-0.174242	0.172025	0.999999	-0.149892	0.216456	0.999998
cg16839944	18	47418838	MYO5B	MYO5B	18	32560904	-0.630404	6.7077e-05	0.037505	-0.0157707	0.91633	0.999996	0.108349	0.450156	0.999987	-0.0632115	0.674005	0.999999	0.0328273	0.818462	0.999998
cg16443856	1	54797025	SSBP3	SSBP3	1	170083356	-0.615755	6.79598e-05	0.0375694	0.0169355	0.908136	0.999996	0.0715251	0.609452	0.999987	-0.182666	0.21754	0.999999	0.0465691	0.739196	0.999998
cg25267982	17	72711509	RAB37	RAB37	16	71053665	0.568828	6.77835e-05	0.0375694	0.0330892	0.807207	0.999996	0.0184765	0.886219	0.999987	-0.278699	0.0449047	0.999999	0.0039684	0.97548	0.999998
cg26667946	13	46425874	SIAH3	SIAH3	17	24350498	-1.35881	6.79921e-05	0.0375694	0.173424	0.592959	0.999996	0.330413	0.287484	0.999987	-0.00706281	0.982601	0.999999	0.209611	0.49804	0.999998
cg06908401	14	21167897	RNASE4	RNASE4	7	82592935	-0.765998	6.79269e-05	0.0375694	0.00335634	0.985332	0.999996	0.112123	0.520117	0.999987	0.0265124	0.884545	0.999999	-0.0729761	0.675055	0.999998
cg16323231	17	34062293	RASL10B	RASL10B	16	32080029	-1.53526	6.77795e-05	0.0375694	0.11573	0.751887	0.999996	-0.00400228	0.990836	0.999987	-9.053e-05	0.999803	0.999999	0.166072	0.634131	0.999998
cg04021014	22	49502115		LINC01310	10	2362836	0.632447	6.81893e-05	0.0375899	-0.324218	0.0363646	0.999996	0.0919106	0.523215	0.999987	-0.0376336	0.802963	0.999999	0.0152175	0.915617	0.999998
cg27321175	10	15689009	ITGA8	ITGA8	9	16798377	0.777498	6.88936e-05	0.0378892	-0.00530124	0.977199	0.999996	-0.098887	0.576415	0.999987	0.13572	0.465811	0.999999	-0.0508228	0.773721	0.999998
cg21477854	5	2283058		IRX4	6	2226965	0.775183	6.97879e-05	0.0382914	-0.00606873	0.973846	0.999996	0.0265779	0.880197	0.999987	0.214197	0.251049	0.999999	0.0954675	0.588862	0.999998
cg14349956	15	74637483	CYP11A1	CYP11A1	7	51355817	1.51808	7.03219e-05	0.0384049	0.299633	0.410689	0.999996	0.160695	0.642274	0.999987	-0.0269792	0.940707	0.999999	0.222506	0.520601	0.999998
cg18739142	19	46094912	GPR4	OPA3	19	45660091	0.730488	7.01646e-05	0.0384049	0.0412865	0.813032	0.999996	0.0213514	0.897798	0.999987	-0.0364833	0.834435	0.999999	-0.00058414	0.997196	0.999998
cg23973515	2	200511137	LOC101927641	FTCDNL1	12	86742480	-0.827137	7.11956e-05	0.0387919	-0.151613	0.445009	0.999996	0.00151276	0.993594	0.999987	0.22927	0.250259	0.999999	-0.34149	0.0754908	0.999998
cg11947985	6	44119668	TMEM63B	TMEM63B	4	125175763	-0.579692	7.17523e-05	0.0389146	0.0136522	0.921597	0.999996	-0.0667997	0.613684	0.999987	-0.073111	0.598742	0.999999	-0.0747362	0.572361	0.999998
cg18321495	20	61158170	C20orf166	MIR1-1HG	10	97715349	0.45154	7.16217e-05	0.0389146	0.15063	0.168154	0.999996	0.0013083	0.989855	0.999987	0.114164	0.293865	0.999999	-0.0791448	0.443438	0.999998
cg07831644	6	44238413	TMEM151B	TMEM151B	4	125059041	-1.87852	7.23122e-05	0.0391279	0.464961	0.304333	0.999996	0.179125	0.676162	0.999987	-0.368215	0.414835	0.999999	0.123195	0.773772	0.999998
cg19504702	5	153862394		HAND1	6	151889356	0.00220762	0.992202	0.999893	0.0416222	0.860702	0.999996	0.126884	0.575045	0.999987	-1.43214	3.34226e-07	0.0392441	-0.141017	0.533414	0.999998
cg10317445	1	1685553	NADK	NADK	1	222683136	-0.786688	7.29385e-05	0.0393653	-0.140253	0.458258	0.999996	-0.0574216	0.749205	0.999987	-0.222727	0.241234	0.999999	-0.0363462	0.839581	0.999998
cg02414710	1	232650142	SIPA1L2	SIPA1L2	1	16498518	-1.18714	7.30862e-05	0.0393653	-0.183995	0.518766	0.999996	0.0183359	0.946042	0.999987	0.0939601	0.741301	0.999999	-0.305925	0.262495	0.999998
cg08682172	1	16508512		ARHGEF19	1	208596400	-0.821402	7.34565e-05	0.0394055	0.0641499	0.7447	0.999996	0.0919389	0.624445	0.999987	-0.010734	0.956519	0.999999	-0.00136366	0.994198	0.999998
cg00887508	13	22425573		LINC00424	17	2024712	0.489734	7.34965e-05	0.0394055	0.0269014	0.818788	0.999996	0.0504577	0.652189	0.999987	0.053482	0.649078	0.999999	-0.0413112	0.711999	0.999998
cg02722633	5	142180618	ARHGAP26	ARHGAP26	6	140210107	-0.835942	7.39973e-05	0.0395001	0.247327	0.221529	0.999996	0.203763	0.289243	0.999987	-0.0115216	0.954168	0.999999	-0.0923553	0.629106	0.999998
cg26292841	19	13510763	CACNA1A	CACNA1A	19	12996279	0.742801	7.40092e-05	0.0395001	0.12642	0.479239	0.999996	0.0707571	0.676984	0.999987	0.0317482	0.858568	0.999999	0.0707907	0.67684	0.999998
cg11874426	11	118781731	BCL9L	BCL9L	14	111973873	0.601172	7.43039e-05	0.0395674	0.0477427	0.740759	0.999996	-0.0657722	0.632535	0.999987	0.0301495	0.834436	0.999999	0.000672923	0.996091	0.999998
cg02576239	5	140772148	PCDHGA8	PCDHGA8	6	138764213	-1.15803	7.53554e-05	0.0400366	-0.131774	0.636043	0.999996	0.35739	0.182009	0.999987	0.115245	0.678865	0.999999	-0.00118312	0.996436	0.999998
cg20132738	1	186528736		MIR548F1	1	43786796	0.63472	7.59127e-05	0.0401573	0.0547205	0.719924	0.999996	0.156581	0.284427	0.999987	-0.144394	0.346324	0.999999	0.00812648	0.955384	0.999998
cg00045753	9	123630545	PHF19	PHF19	15	21842004	-0.611412	7.6012e-05	0.0401573	-0.00173782	0.990562	0.999996	-0.132855	0.345045	0.999987	-0.0483337	0.742311	0.999999	-0.0286481	0.837823	0.999998
cg11737856	22	39024644	FAM227A	FAM227A	10	12933555	0.748237	7.60957e-05	0.0401573	0.281052	0.123451	0.999996	0.220378	0.20266	0.999987	0.19813	0.274006	0.999999	0.0044985	0.979044	0.999998
cg00465284	2	80531898	CTNNA2	CTNNA2	13	28317649	-0.984568	7.64246e-05	0.0402074	0.0226542	0.923743	0.999996	0.00600646	0.978742	0.999987	-0.0893555	0.705993	0.999999	0.0358227	0.873755	0.999998
cg20368124	15	89951184		MIR9-3HG	7	68185549	-0.74724	7.67043e-05	0.0402074	0.258193	0.155791	0.999996	0.052429	0.759456	0.999987	-0.0499764	0.780981	0.999999	-0.0996592	0.561136	0.999998
cg00835193	19	2291780	LINGO3	LINGO3	19	2138577	-1.09925	7.66723e-05	0.0402074	-0.0977083	0.711831	0.999996	-0.44962	0.07969	0.999987	-0.329469	0.216838	0.999999	-0.467744	0.0687015	0.999998
cg06438530	13	75196940		LINC00347	17	56406843	0.750598	7.71756e-05	0.0402796	0.0439991	0.807533	0.999996	-0.141778	0.411647	0.999987	0.115516	0.523339	0.999999	0.0516366	0.764108	0.999998
cg24724506	19	55964383	ISOC2	ISOC2	19	55201573	-0.82134	7.71849e-05	0.0402796	-0.0354307	0.857701	0.999996	-0.275055	0.149029	0.999987	0.17075	0.389599	0.999999	0.00861669	0.963479	0.999998
cg20864859	5	140502903	PCDHB4	PCDHB4	6	138501780	-0.814389	7.80678e-05	0.0405801	-0.0572822	0.770272	0.999996	0.0280215	0.880741	0.999987	0.144079	0.463885	0.999999	0.0376523	0.840251	0.999998
cg18763605	8	78067452		PEX2	8	77624226	0.681506	7.81064e-05	0.0405801	0.0958987	0.55971	0.999996	-0.00386321	0.980279	0.999987	0.123335	0.453783	0.999999	-0.0786004	0.615552	0.999998
cg09226508	2	41961507		LINC01913	13	67066878	0.623773	7.87664e-05	0.0407778	0.0912155	0.544738	0.999996	0.00232442	0.987043	0.999987	-0.0472415	0.753371	0.999999	0.0582299	0.684434	0.999998
cg16754490	7	158374490	PTPRN2	PTPRN2	3	184534492	0.619847	7.88343e-05	0.0407778	0.15814	0.292884	0.999996	0.0488256	0.731584	0.999987	0.00129372	0.993088	0.999999	0.0876391	0.538743	0.999998
cg19079357	10	51045358	PARG	PARG	9	47535256	0.7328	7.91967e-05	0.0408753	-0.194907	0.27328	0.999996	0.0182558	0.913584	0.999987	-0.0738906	0.675976	0.999999	-0.112954	0.503085	0.999998
cg07111008	1	112524769	KCND3	KCND3	1	112209414	0.547921	7.97726e-05	0.0410381	0.105565	0.426072	0.999996	0.152373	0.230088	0.999987	-0.0182865	0.889926	0.999999	-0.0670192	0.594972	0.999998
cg03562628	1	158054237	KIRREL	KIRREL1	1	92913350	0.835337	8.08733e-05	0.0410381	-0.0416178	0.836506	0.999996	0.281618	0.147735	0.999987	0.0337882	0.866932	0.999999	0.00589689	0.975504	0.999998
cg13774987	2	228579338	SLC19A3	SLC19A3	12	115169019	-0.542919	8.12258e-05	0.0410381	0.0740663	0.572798	0.999996	0.212367	0.0945719	0.999987	0.134884	0.306587	0.999999	-0.0689179	0.581672	0.999998
cg19925204	10	119307692	EMX2	EMX2	9	118031098	-1.42194	8.12597e-05	0.0410381	-0.878562	0.0137334	0.999996	0.0677907	0.83582	0.999987	0.32887	0.340807	0.999999	-0.35296	0.283847	0.999998
cg01518169	6	92828798		MIR4643	4	81265655	0.599233	8.00752e-05	0.0410381	0.00638438	0.964766	0.999996	-0.0895207	0.516596	0.999987	0.119156	0.411622	0.999999	0.0664519	0.629792	0.999998
cg11196473	9	34957576	PHF24	PHF24	15	49271321	-0.660007	8.05342e-05	0.0410381	-0.120563	0.450599	0.999996	-0.183832	0.229685	0.999987	-0.0632937	0.691323	0.999999	-0.291708	0.0599183	0.999998
cg05599109	10	6348943		LINC02649	9	7483815	0.659738	8.02224e-05	0.0410381	0.0504328	0.751463	0.999996	-0.131464	0.387976	0.999987	0.0810949	0.610915	0.999999	0.0816439	0.590821	0.999998
cg08732300	10	50506885	C10orf71	C10orf71	9	48076666	0.82235	8.07785e-05	0.0410381	0.0956485	0.630338	0.999996	0.0120707	0.94909	0.999987	0.102877	0.604802	0.999999	0.138224	0.466128	0.999998
cg25510961	12	66276974	LOC100129940	HMGA2	11	65463527	0.775487	8.01016e-05	0.0410381	-0.0376438	0.840535	0.999996	-0.220513	0.220084	0.999987	-0.192791	0.305786	0.999999	0.0328533	0.853728	0.999998
cg00083937	22	51039805	MAPK8IP2	MAPK8IP2	10	883110	0.55853	8.10041e-05	0.0410381	0.134185	0.322524	0.999996	-0.101613	0.430566	0.999987	0.0526844	0.696241	0.999999	-0.134216	0.299174	0.999998
cg09695307	10	63993920	RTKN2	RTKN2	9	75743505	0.978727	8.14377e-05	0.0410397	-0.0235555	0.920615	0.999996	0.139729	0.535777	0.999987	-0.136111	0.565476	0.999999	0.0989885	0.660528	0.999998
cg10727146	5	140892171	PCDHGC3	PCDHGA8	6	138890373	-1.43573	8.28621e-05	0.0415791	0.176522	0.611673	0.999996	-0.00328107	0.992083	0.999987	0.00821794	0.981114	0.999999	-0.218766	0.509365	0.999998
cg01538756	5	158272982	EBF1	EBF1	6	156266814	0.730417	8.27514e-05	0.0415791	-0.0286109	0.871313	0.999996	-0.126989	0.45185	0.999987	-0.0134534	0.939275	0.999999	0.0561917	0.738504	0.999998
cg25144865	1	82066778		ADGRL2	1	142821761	0.879741	8.62534e-05	0.0418334	0.038473	0.856918	0.999996	-0.0258666	0.898722	0.999987	-0.00372311	0.986077	0.999999	-0.0555925	0.784512	0.999998
cg21886743	2	202717951	CDK15	CDK15	12	89168407	-0.661163	8.51282e-05	0.0418334	-0.0583593	0.71583	0.999996	-0.256132	0.0987979	0.999987	0.29146	0.0744067	0.999999	0.0342443	0.822467	0.999998
cg22296585	2	207741102		CPO	12	94304449	0.877378	8.52636e-05	0.0418334	0.097974	0.645327	0.999996	0.284976	0.164334	0.999987	0.206836	0.333368	0.999999	0.244063	0.232192	0.999998
cg11026936	2	217253226		2022-03-04	12	103758443	-0.789646	8.61058e-05	0.0418334	-0.108432	0.571935	0.999996	-0.0901942	0.621443	0.999987	-0.15091	0.432346	0.999999	-0.0276911	0.879335	0.999998
cg02920129	3	21792195	ZNF385D	ZNF385D	2	25980289	-1.0677	8.46298e-05	0.0418334	-0.0408063	0.874617	0.999996	-0.368105	0.140289	0.999987	-0.052076	0.84042	0.999999	-0.0857748	0.727827	0.999998
cg03318614	5	140174612	PCDHA1	PCDHA1	6	138180258	1.36382	8.65754e-05	0.0418334	0.343875	0.301769	0.999996	0.106296	0.73605	0.999987	-0.0417809	0.89951	0.999999	0.0786781	0.802909	0.999998
cg09258634	7	78400769	MAGI2	MAGI2	3	127447979	-0.700432	8.59195e-05	0.0418334	-0.0215104	0.899209	0.999996	-0.0132781	0.934577	0.999987	-0.0226483	0.893909	0.999999	0.223547	0.171857	0.999998
cg21159370	7	88389282	ZNF804B	ZNF804B	3	117381445	1.15166	8.61679e-05	0.0418334	-0.25618	0.361427	0.999996	0.0197799	0.940727	0.999987	0.0554574	0.842626	0.999999	0.0534855	0.840683	0.999998
cg07849009	7	105663410	FLJ23834	CDHR3	3	132331182	1.02552	8.48672e-05	0.0418334	0.232995	0.350828	0.999996	-0.0423307	0.858035	0.999987	0.0941138	0.705021	0.999999	-0.0711768	0.763672	0.999998
cg00528341	10	6318527		LINC02649	9	7456269	0.605294	8.64453e-05	0.0418334	0.119571	0.417271	0.999996	0.0566451	0.685725	0.999987	0.0131113	0.928841	0.999999	-0.0916408	0.513365	0.999998
cg08423879	12	103437918		ASCL1	11	102787653	0.816783	8.48071e-05	0.0418334	0.162251	0.414041	0.999996	0.309691	0.105844	0.999987	-0.048351	0.806983	0.999999	0.0770513	0.682919	0.999998
cg09319061	12	109128198		CORO1C	11	108362419	0.69865	8.56331e-05	0.0418334	0.037731	0.823731	0.999996	-0.0123651	0.938896	0.999987	0.0253582	0.880978	0.999999	0.0169647	0.916241	0.999998
cg05728281	15	60840435	RORA-AS1	RORA	7	37014889	0.594119	8.56311e-05	0.0418334	-0.077851	0.589429	0.999996	0.0616773	0.653354	0.999987	-0.029008	0.84039	0.999999	-0.0352534	0.797245	0.999998
cg10855425	15	74067214		INSYN1	7	50601919	0.56904	8.6335e-05	0.0418334	0.0408293	0.767463	0.999996	-0.156169	0.23883	0.999987	0.127396	0.358435	0.999999	-0.0532221	0.685865	0.999998
cg21313729	15	81384774		CFAP161	7	58416777	-0.817408	8.51e-05	0.0418334	-0.16114	0.417688	0.999996	0.0413186	0.826662	0.999987	0.108265	0.585263	0.999999	-0.181255	0.339308	0.999998
cg26730763	16	28205389	XPO6	XPO6	20	26541773	0.723091	8.59119e-05	0.0418334	0.101673	0.56273	0.999996	-0.0330967	0.842918	0.999987	-0.295778	0.0971551	0.999999	0.0554771	0.739877	0.999998
cg24818159	19	31183833		ZNF536	19	30127149	1.12711	8.57953e-05	0.0418334	-0.0641785	0.814352	0.999996	0.163635	0.5305	0.999987	-0.110094	0.687283	0.999999	0.0651964	0.802263	0.999998
cg03680314	22	26086867	ADRBK2	GRK3	10	25881952	0.819034	8.58962e-05	0.0418334	-0.0543943	0.784224	0.999996	-0.0043836	0.981509	0.999987	-0.0699405	0.72486	0.999999	-0.209334	0.271934	0.999998
cg20170508	1	6106125	KCNAB2	KCNAB2	1	218487545	0.456387	8.78935e-05	0.0420002	0.13711	0.220304	0.999996	0.0330169	0.754609	0.999987	0.0188356	0.865073	0.999999	-0.126903	0.233407	0.999998
cg25613262	1	155146497	KRTCAP2	TRIM46	1	95853063	-0.714407	8.81233e-05	0.0420002	-0.182319	0.296634	0.999996	-0.24276	0.147104	0.999987	-0.130226	0.454514	0.999999	0.122895	0.458668	0.999998
cg06577710	3	121379745	HCLS1	HCLS1	2	154675285	-0.766727	8.76881e-05	0.0420002	-0.194448	0.299451	0.999996	0.0158586	0.928741	0.999987	-0.111834	0.5489	0.999999	-0.0223111	0.899882	0.999998
cg11646192	4	75230615	EREG	EREG	5	59339810	-0.711534	8.71077e-05	0.0420002	0.0252596	0.883713	0.999996	0.393287	0.020723	0.999987	0.0392968	0.820033	0.999999	0.167054	0.312821	0.999998
cg14441787	8	40811496		ZMAT4	8	41525106	-1.54752	8.82935e-05	0.0420002	0.303169	0.421825	0.999996	-0.127864	0.721238	0.999987	-0.381062	0.31377	0.999999	-0.152958	0.669608	0.999998
cg24517989	11	12915502	TEAD1	TEAD1	14	52727577	0.672414	8.83514e-05	0.0420002	-0.142964	0.383696	0.999996	-0.105868	0.49747	0.999987	0.140618	0.391475	0.999999	0.0885188	0.570189	0.999998
cg00494665	12	65218728		TBC1D30	11	64389676	-0.772265	8.77302e-05	0.0420002	0.213614	0.258365	0.999996	0.141844	0.428881	0.999987	0.161206	0.392086	0.999999	-0.0227831	0.898508	0.999998
cg17740822	12	89744609	DUSP6	DUSP6	11	89051911	-1.37912	8.75918e-05	0.0420002	-0.03593	0.914549	0.999996	-0.104718	0.742815	0.999987	-0.187288	0.576644	0.999999	-0.145378	0.648925	0.999998
cg11616237	5	159776351	C1QTNF2	C1QTNF2	6	157734901	0.811592	8.88757e-05	0.0420791	-0.119546	0.545378	0.999996	-0.248959	0.189825	0.999987	-0.0182575	0.926257	0.999999	-0.113003	0.548425	0.999998
cg23642875	10	101835765	CPN1	CPN1	9	100540031	-1.06857	8.8801e-05	0.0420791	0.0198132	0.939186	0.999996	-0.187307	0.450502	0.999987	-0.235038	0.367821	0.999999	-0.138178	0.577154	0.999998
cg20633146	1	175482184	TNR	TNR	1	32755223	0.767205	8.97647e-05	0.0422858	-0.0695783	0.709478	0.999996	0.0586819	0.741448	0.999987	-0.0591627	0.751349	0.999999	-0.161523	0.365889	0.999998
cg07410604	12	130648972	FZD10	FZD10	11	130001870	0.96963	8.98525e-05	0.0422858	0.0844563	0.720485	0.999996	-0.0349977	0.876219	0.999987	0.0366441	0.876548	0.999999	0.0661733	0.76845	0.999998
cg00804055	21	31015180	GRIK1	GRIK1	3	17030251	0.732608	8.97792e-05	0.0422858	0.0957494	0.59168	0.999996	0.0750602	0.658697	0.999987	-0.142347	0.426175	0.999999	0.0675691	0.690837	0.999998
cg07277086	3	27711142		EOMES	2	20066384	-0.720857	9.00456e-05	0.0422919	-0.269274	0.130048	0.999996	0.0266344	0.873335	0.999987	-0.14722	0.403217	0.999999	-0.0303767	0.855728	0.999998
cg14590912	9	135905092	GTF3C5	GTF3C5	15	7336663	1.25073	9.02338e-05	0.0422957	-0.057269	0.850762	0.999996	-0.0118967	0.967263	0.999987	0.076379	0.801903	0.999999	0.272216	0.350268	0.999998
cg13114737	7	50316646		IKZF1	3	65000904	0.70999	9.08294e-05	0.0423013	0.224647	0.198239	0.999996	-0.105602	0.522272	0.999987	0.0524696	0.761577	0.999999	-0.0492502	0.764943	0.999998
cg25427233	11	120435560		GRIK4	14	113633363	1.85677	9.09662e-05	0.0423013	-0.0409301	0.927859	0.999996	0.0150642	0.972091	0.999987	-0.107206	0.8126	0.999999	0.0148336	0.972519	0.999998
cg26792687	16	22177571		VWA3A	20	20423559	0.713941	9.05343e-05	0.0423013	0.0288746	0.868037	0.999996	0.016232	0.921876	0.999987	0.166724	0.339994	0.999999	0.00944075	0.954512	0.999998
cg00903250	22	31604155		RNF185	10	20308072	-0.925444	9.08831e-05	0.0423013	0.0152197	0.946141	0.999996	-0.0247631	0.90814	0.999987	0.0812184	0.718687	0.999999	-0.208669	0.333641	0.999998
cg06766307	1	44399340	ARTN	ARTN	1	180517650	-0.752778	9.20763e-05	0.0427329	-0.052777	0.773678	0.999996	0.0212776	0.903084	0.999987	-0.131696	0.474187	0.999999	-0.0563404	0.747267	0.999998
cg05308639	19	1525316	PLK5P	PLK5	19	1322087	0.629824	9.26229e-05	0.0429018	-0.119662	0.437476	0.999996	-0.132281	0.368131	0.999987	-0.20536	0.185792	0.999999	-0.179162	0.224765	0.999998
cg14066797	17	32299790	ASIC2	ASIC2	16	30363218	0.665828	9.46032e-05	0.0437327	-0.0317484	0.845205	0.999996	0.119271	0.442825	0.999987	-0.00590991	0.971002	0.999999	-0.0130328	0.932931	0.999998
cg12312176	18	74327414		LINC00908	18	3433711	1.03686	9.48622e-05	0.0437663	0.0961275	0.704477	0.999996	0.164794	0.49569	0.999987	0.0459495	0.856035	0.999999	-0.152056	0.529419	0.999998
cg07926792	1	39655748	MACF1	MACF1	1	185391059	-1.13047	9.59302e-05	0.0438129	0.140835	0.610832	0.999996	-0.00885648	0.973156	0.999987	-0.351949	0.207196	0.999999	-0.129498	0.623213	0.999998
cg21825734	2	179640548	TTN	TTN	12	65897153	-0.80454	9.65697e-05	0.0438129	0.284295	0.153591	0.999996	-0.107893	0.565588	0.999987	0.155095	0.432263	0.999999	-0.12023	0.522205	0.999998
cg22492435	10	101542189	ABCC2	ABCC2	9	100263708	0.739044	9.60619e-05	0.0438129	0.364547	0.0488399	0.999996	-0.149084	0.388457	0.999987	0.150029	0.408249	0.999999	-0.0854338	0.620083	0.999998
cg16761390	7	27290724		EVX1	3	87855193	1.18043	9.62436e-05	0.0438129	-0.332538	0.25302	0.999996	0.174062	0.527609	0.999987	0.0796198	0.78273	0.999999	-0.143218	0.602966	0.999998
cg24388927	7	74212332	GTF2IRD2	GTF2IRD2	3	47157420	0.621125	9.66422e-05	0.0438129	0.0131415	0.931061	0.999996	0.0902846	0.533603	0.999987	-0.020831	0.890935	0.999999	-0.068138	0.638145	0.999998
cg24165086	11	64705980	C11orf85	MAJIN	14	9597346	-0.568781	9.61498e-05	0.0438129	0.0957446	0.492341	0.999996	0.135864	0.308069	0.999987	0.0711929	0.609219	0.999999	0.0657416	0.620158	0.999998
cg17466726	12	122239520	LINC01089	LINC01089	11	121647598	1.00186	9.62116e-05	0.0438129	0.00205937	0.993291	0.999996	-0.186677	0.425428	0.999987	0.0843249	0.730822	0.999999	0.101579	0.663639	0.999998
cg13998712	17	34062321	RASL10B	RASL10B	16	32080057	-1.51937	9.63681e-05	0.0438129	0.00543515	0.988327	0.999996	0.176117	0.61922	0.999987	-0.0379266	0.918689	0.999999	0.0192798	0.956549	0.999998
cg19720780	17	51900887	KIF2B	KIF2B	16	42927776	-1.34801	9.61563e-05	0.0438129	-0.016173	0.960858	0.999996	-0.0300742	0.923675	0.999987	0.28337	0.391982	0.999999	0.120012	0.702466	0.999998
cg24842528	13	51225089		DLEU7	17	29109236	-0.545958	9.72297e-05	0.0438254	-0.0512662	0.701388	0.999996	-0.136988	0.285023	0.999987	-0.153873	0.25316	0.999999	-0.0177438	0.889102	0.999998
cg12113981	15	32383990	CHRNA7	CHRNA7	7	6206229	0.64522	9.70043e-05	0.0438254	-0.106842	0.49966	0.999996	-0.209554	0.168317	0.999987	0.159322	0.315774	0.999999	0.0451523	0.764051	0.999998
cg22839447	17	10561350	MYH3	MYH3	16	10448032	0.638999	9.71864e-05	0.0438254	0.0709279	0.650465	0.999996	-0.076023	0.610258	0.999987	-0.00795001	0.959444	0.999999	-0.140502	0.34803	0.999998
cg21816234	10	68596330	CTNNA3	CTNNA3	9	71116664	1.02106	9.89959e-05	0.0445097	-0.135863	0.587725	0.999996	-0.100554	0.673356	0.999987	0.0335293	0.893387	0.999999	-0.269604	0.261554	0.999998
cg15951864	18	74139457	ZNF516	ZNF516	18	3618092	0.827563	9.9127e-05	0.0445097	0.0876552	0.665889	0.999996	0.0250179	0.896947	0.999987	0.135841	0.504073	0.999999	-0.023353	0.903769	0.999998
cg08703055	1	2232481	SKI	SKI	1	222107996	-0.568453	9.99473e-05	0.0446221	0.0799107	0.567167	0.999996	0.0503093	0.704952	0.999987	-0.223804	0.11382	0.999999	-0.0613047	0.644653	0.999998
cg23986620	2	177012706		MIR10B	12	63262425	0.974423	9.98067e-05	0.0446221	0.0446145	0.851872	0.999996	-0.178594	0.43423	0.999987	0.108892	0.648912	0.999999	-0.0277985	0.90277	0.999998
cg01218447	8	116426596	TRPS1	TRPS1	8	115689269	-0.604801	9.96012e-05	0.0446221	-0.311217	0.0407889	0.999996	0.163221	0.251538	0.999987	-0.0501555	0.735287	0.999999	-0.0885838	0.531414	0.999998
cg14208149	10	118745373	SHTN1	SHTN1	9	117476591	-1.16127	0.000100867	0.0449475	-0.0714444	0.802069	0.999996	0.253068	0.353609	0.999987	0.0121033	0.966115	0.999999	-0.0630898	0.816224	0.999998
cg27525902	15	49716247	C15orf33	FGF7	7	25851476	0.66132	0.000101175	0.044999	0.172848	0.290152	0.999996	-0.217957	0.163549	0.999987	0.334337	0.0445031	0.999999	-0.0388508	0.80163	0.999998
cg02676172	11	113069817	NCAM1	NCAM1	14	106354826	-0.788106	0.000102067	0.045197	0.0678632	0.726032	0.999996	-0.0624459	0.734966	0.999987	-0.0623751	0.74737	0.999999	-0.150543	0.416007	0.999998
cg22781074	16	777456	HAGHL	HAGHL	20	756975	-1.44386	0.000102197	0.045197	-0.438799	0.220159	0.999996	-0.425178	0.212444	0.999987	-0.578521	0.10832	0.999999	-0.592257	0.0851182	0.999998
cg04253011	19	39906496	PLEKHG2	PLEKHG2	19	38667848	0.489712	0.000101904	0.045197	0.00140651	0.990667	0.999996	0.194832	0.0945143	0.999987	-0.0451843	0.707311	0.999999	0.0325133	0.776601	0.999998
cg09389557	2	1689803	PXDN	PXDN	13	107099097	0.999528	0.000104123	0.0457898	0.12238	0.619106	0.999996	-0.0270265	0.90811	0.999987	-0.0537021	0.82711	0.999999	-0.106532	0.649521	0.999998
cg23448729	5	63256285	HTR1A	HTR1A	6	62471068	-1.50672	0.000103789	0.0457898	0.390623	0.29493	0.999996	0.30725	0.386086	0.999987	0.00632842	0.98637	0.999999	-0.653869	0.06942	0.999998
cg15350899	11	118781763	BCL9L	BCL9L	14	111973905	0.586303	0.000103955	0.0457898	-0.00337189	0.98134	0.999996	-0.0253717	0.853447	0.999987	0.0279557	0.84628	0.999999	0.0141983	0.917655	0.999998
cg08805393	1	61645958	NFIA	NFIA	1	163269499	0.714086	0.000105214	0.0458426	0.206989	0.24284	0.999996	-0.017899	0.914856	0.999987	-0.17724	0.316208	0.999999	-0.0883947	0.598097	0.999998
cg04114754	7	145750627		CNTNAP2	3	172467479	0.640324	0.000105201	0.0458426	0.193111	0.224631	0.999996	-0.00781299	0.95849	0.999987	0.10152	0.520506	0.999999	-0.00440051	0.976613	0.999998
cg11292836	12	78361907	NAV3	NAV3	11	77539164	0.636811	0.000104518	0.0458426	-0.135386	0.389607	0.999996	-0.00638361	0.965875	0.999987	-0.156737	0.319988	0.999999	-0.210745	0.162858	0.999998
cg26998274	13	84456258	SLITRK1	SLITRK1	17	65735549	-2.19436	0.000105219	0.0458426	-0.344955	0.524036	0.999996	0.261609	0.611632	0.999987	-0.448761	0.407984	0.999999	-0.156002	0.761823	0.999998
cg08560695	19	54418930	CACNG7	CACNG7	19	53674040	1.03137	0.000104966	0.0458426	0.130853	0.606724	0.999996	0.049817	0.836772	0.999987	0.0344182	0.892136	0.999999	0.0148891	0.950889	0.999998
cg22001533	2	50574516	NRXN1	NRXN1	13	58396412	-1.8416	0.000105729	0.0458947	0.0572449	0.89954	0.999996	-0.32067	0.459298	0.999987	0.177323	0.696002	0.999999	0.0727042	0.866336	0.999998
cg19180834	18	77607498		KCNG2	18	431373	-0.705876	0.000105729	0.0458947	-0.0461993	0.790455	0.999996	-0.0443759	0.788735	0.999987	0.0287125	0.868797	0.999999	-0.0175467	0.915589	0.999998
cg23289153	3	131100566	NUDT16	NUDT16	2	33676722	-0.778032	0.000107071	0.0462206	0.107142	0.577026	0.999996	-0.00237967	0.989604	0.999987	0.211242	0.274109	0.999999	-0.0310432	0.865052	0.999998
cg15740805	8	21911257	DMTN	DMTN	8	22219106	1.84444	0.000106724	0.0462206	-0.0394807	0.93077	0.999996	0.516931	0.236421	0.999987	1.05531	0.0244221	0.999999	0.837123	0.0585413	0.999998
cg25912529	5	51156364		ISL1	6	50067825	0.716893	0.000106892	0.0462206	0.0737479	0.676648	0.999996	-0.0844399	0.616321	0.999987	-0.198339	0.265173	0.999999	0.159015	0.34725	0.999998
cg10951590	8	4848439	CSMD1	CSMD1	8	5729555	0.87106	0.00010778	0.0464417	0.0809233	0.706571	0.999996	-0.0559265	0.784654	0.999987	-0.266954	0.218165	0.999999	-0.0862524	0.673633	0.999998
cg03862427	12	95244824		KRT19P2	11	94650397	0.667077	0.000108019	0.0464591	-0.206884	0.212887	0.999996	0.0401051	0.798068	0.999987	0.167349	0.312052	0.999999	0.0130986	0.933381	0.999998
cg09778401	17	39810502		JUP	16	52775418	0.555309	0.00010879	0.0467055	0.045571	0.739604	0.999996	0.150219	0.253524	0.999987	-0.0539307	0.694139	0.999999	0.133672	0.3088	0.999998
cg18742855	2	26800399	C2orf70	C2orf70	13	82398576	0.867664	0.000109065	0.0467378	0.0448081	0.834286	0.999996	-0.128952	0.528227	0.999987	0.117075	0.585225	0.999999	-0.00806618	0.968453	0.999998
cg06260865	18	22252503		LINC01915	18	57750242	0.804202	0.000109529	0.0468513	-0.0163706	0.934282	0.999996	-0.142589	0.452389	0.999987	-0.119441	0.548296	0.999999	0.0342947	0.856114	0.999998
cg26465611	5	126626719	MEGF10	MEGF10	6	124773094	1.05952	0.000109767	0.0468677	-0.156579	0.550344	0.999996	0.0858915	0.730504	0.999987	0.0930188	0.722359	0.999999	0.0409296	0.869546	0.999998
cg02519037	10	123872515	TACC2	TACC2	9	122579435	-1.31227	0.00011028	0.0470012	0.145416	0.654076	0.999996	-0.0562149	0.855542	0.999987	0.0823819	0.799437	0.999999	0.0752077	0.807602	0.999998
cg07637213	10	50820604	CHAT	SLC18A3	9	47773437	-0.911366	0.000110693	0.0470695	0.172161	0.446121	0.999996	0.272918	0.207615	0.999987	-0.159629	0.479696	0.999999	0.0349882	0.870429	0.999998
cg10426062	14	73677854	PSEN1	PSEN1	7	135339961	-0.707487	0.000110841	0.0470695	0.0514643	0.768566	0.999996	-0.192157	0.252301	0.999987	-0.1021	0.559989	0.999999	0.0436351	0.793358	0.999998
cg12062757	5	55228305		IL6ST	6	54238380	-0.722865	0.000111101	0.0470907	-0.137067	0.444547	0.999996	0.00662852	0.968926	0.999987	-0.0846907	0.635899	0.999999	-0.13512	0.428916	0.999998
cg20337103	11	118781778	BCL9L	BCL9L	14	111973920	0.583417	0.000111292	0.0470907	-0.0533443	0.711654	0.999996	-0.0349247	0.799358	0.999987	0.113196	0.43417	0.999999	0.0734422	0.593494	0.999998
cg11952704	11	62063549		SCGB1D4	14	11896513	0.472486	0.000112067	0.0473332	0.0416773	0.721519	0.999996	0.105836	0.344271	0.999987	-0.0577406	0.621694	0.999999	0.119687	0.285557	0.999998
cg03447718	9	80263310	GNA14	GNA14	15	93023050	-0.784612	0.000112334	0.0473369	-0.0833938	0.667741	0.999996	-0.0101173	0.956351	0.999987	-0.268525	0.171355	0.999999	0.129272	0.485633	0.999998
cg17893426	10	133981520	JAKMIP3	JAKMIP3	9	132623517	-1.78732	0.000112478	0.0473369	-0.0311404	0.943847	0.999996	0.22203	0.598641	0.999987	-0.0703093	0.873661	0.999999	0.0481631	0.90895	0.999998
cg12858504	1	183184696	LAMC2	LAMC2	1	40462701	0.751689	0.000113124	0.0473539	-0.191936	0.305277	0.999996	-0.0267323	0.880091	0.999987	-0.372697	0.0503873	0.999999	-0.299719	0.0963248	0.999998
cg00072711	9	34381150	C9orf24	C9orf24	15	49817942	-0.737811	0.000112899	0.0473539	0.23862	0.195763	0.999996	0.0489708	0.778333	0.999987	0.0835803	0.647487	0.999999	-0.0851871	0.624708	0.999998
cg23687603	12	113957749		LHX5	11	113236527	1.05578	0.000113124	0.0473539	-0.131363	0.615656	0.999996	0.0703137	0.777633	0.999987	-0.0897182	0.731485	0.999999	0.0906953	0.715748	0.999998
cg07986666	12	53298383	KRT8	KRT8	11	52470353	0.784318	0.000114603	0.0478877	-0.116027	0.551233	0.999996	0.0547837	0.76732	0.999987	0.306807	0.11976	0.999999	-0.0525644	0.776481	0.999998
cg21596995	17	1547990	SCARF1	SCARF1	16	1505663	-0.561821	0.000114873	0.0479153	0.154181	0.271557	0.999996	0.182931	0.17256	0.999987	-0.0192041	0.890277	0.999999	-0.0323217	0.807464	0.999998
cg25733957	19	18480246	PGPEP1	PGPEP1	19	17912161	0.647165	0.000115251	0.0479878	-0.152645	0.343856	0.999996	-0.0214561	0.888312	0.999987	0.207494	0.200265	0.999999	0.136613	0.373488	0.999998
cg26944426	7	19182017		FERD3L	3	95897547	0.825143	0.000117352	0.0487761	-0.077602	0.704942	0.999996	-0.152474	0.436062	0.999987	0.119758	0.559456	0.999999	0.153779	0.432175	0.999998
cg18947840	11	71856512		FOLR3	14	65107964	0.722114	0.000118092	0.048997	-0.112571	0.531051	0.999996	0.22354	0.195122	0.999987	0.0736987	0.681321	0.999999	0.0435166	0.79893	0.999998
cg01898225	15	99975141		LRRC28	7	78635212	0.234324	0.0306182	0.511496	0.252329	0.0268014	0.999996	0.628724	4.17642e-07	0.0490386	-0.0178675	0.871604	0.999999	0.0104499	0.920943	0.999998
cg27317615	18	57685742		PMAIP1	18	20201185	0.787545	0.000118886	0.0492395	0.0784402	0.688727	0.999996	-0.00461082	0.980258	0.999987	0.105239	0.591254	0.999999	0.00120013	0.994861	0.999998
cg20139247	8	65286989		MIR124-2HG	8	64991308	-1.11765	0.000119212	0.0492875	-0.203219	0.465716	0.999996	-0.085341	0.747107	0.999987	0.0255715	0.926629	0.999999	0.0444313	0.866615	0.999998
cg20623645	17	40687392	NAGLU	NAGLU	16	53675620	-0.900001	0.000119657	0.0492978	0.143771	0.52141	0.999996	0.155963	0.46559	0.999987	-0.122753	0.58382	0.999999	0.0807219	0.705012	0.999998
cg11509100	19	14049058	PODNL1	PODNL1	19	13542543	-0.71685	0.000119482	0.0492978	-0.261376	0.147485	0.999996	0.0616951	0.716365	0.999987	-0.159518	0.372847	0.999999	-0.0794685	0.639971	0.999998
cg24111794	11	67267668	PITPNM1	PITPNM1	14	7021453	-0.75452	0.000121135	0.0497731	-0.00709031	0.969865	0.999996	0.0149002	0.933579	0.999987	0.0960666	0.609331	0.999999	-0.00985039	0.95606	0.999998
cg03735351	16	2089866	NTHL1	NTHL1	20	2069824	-0.693582	0.000121235	0.0497731	-0.136229	0.431539	0.999996	-0.00078657	0.996181	0.999987	0.128615	0.45754	0.999999	-0.05346	0.745121	0.999998
cg15289328	2	101835083		CNOT11	13	5028780	-1.22599	0.000121636	0.0498509	-0.42303	0.170456	0.999996	-0.0917308	0.752385	0.999987	-0.374727	0.223523	0.999999	-0.106322	0.71466	0.999998

## Sheet: Table S2
DMRs associated with prenatal THC exposure at FDR significance in placenta.
seqnames	start	end	width	strand	no.cpgs	min_smoothed_fdr	Stouffer	HMFDR	Fisher	maxdiff	meandiff	overlapping.genes
chr5	126625742	126626719	978	*	8	1.36572e-105	1.61451e-20	1.60072e-11	5.68759e-23	0.543689	0.236309	MEGF10
chr5	128795472	128797013	1542	*	15	2.36119e-53	4.03168e-07	0.00200173	1.60252e-10	-0.386327	-0.142283	ADAMTS19, ADAMTS19-AS1
chr5	140892171	140892370	200	*	3	6.69862e-29	1.87364e-09	3.29625e-06	3.21328e-09	-0.393246	-0.302586	PCDHGA1, PCDHGA2, PCDHGA3, PCDHGB1, PCDHGA4, PCDHGB2, PCDHGA5, PCDHGB3, PCDHGA6, PCDHGA7, PCDHGB4, PCDHGA8, PCDHGA9, PCDHGB6, PCDHGA10, PCDHGB7, PCDHGA12, PCDHGC3, PCDHGC4, PCDHGC5
chr17	27939837	27940404	568	*	3	4.14946e-23	1.58867e-07	0.000114301	1.73128e-07	0.360521	0.23508	RP11-68I3.2, ANKRD13B
chr8	6420726	6421171	446	*	5	4.85069e-21	1.22308e-07	0.00350158	1.03638e-06	-0.150574	-0.111679	MCPH1, ANGPT2
chr3	121379745	121379791	47	*	3	6.12898e-18	5.19615e-07	0.00166889	2.27746e-06	-0.177401	-0.152324	HCLS1
chr10	106401319	106402908	1590	*	8	3.85816e-22	6.84264e-07	0.00671189	2.36329e-06	-0.393161	-0.207394	SORCS3
chr19	2291373	2291785	413	*	4	2.4111e-18	4.97955e-07	0.00283862	2.86553e-06	-0.288525	-0.214343	LINGO3
chr1	37941263	37941361	99	*	2	4.55079e-18	1.97333e-06	0.0005517	4.87239e-06	0.183414	0.181415	ZC3H12A
chr5	139492366	139494937	2572	*	13	8.1919e-21	7.58577e-08	0.049636	6.01562e-06	-0.3942	-0.246379	PURA
chr11	118781150	118782085	936	*	8	9.51771e-23	0.00178241	0.00533	2.21087e-05	0.0637305	0.0311706	MIR4492, BCL9L
chr13	75683313	75683669	357	*	2	1.17687e-14	0.000112184	6.14165e-05	4.70827e-05	0.226235	0.15212	NA
chr1	161053211	161054174	964	*	5	3.84917e-14	6.10014e-06	0.0175795	5.09602e-05	0.0878724	0.0722217	PVRL4
chr17	34062219	34062395	177	*	4	3.39591e-14	0.000128816	0.00477099	7.89608e-05	-0.0794006	-0.0545292	RASL10B
chr3	12586970	12587041	72	*	3	1.8208e-12	2.3763e-05	0.00733418	8.67287e-05	-0.183911	-0.150082	C3orf83
chr19	14048977	14049294	318	*	4	8.9569e-14	3.19922e-05	0.0097196	0.000103854	-0.163058	-0.123638	PODNL1
chr11	121526264	121526840	577	*	4	1.13464e-16	0.0148004	0.00127365	0.000145259	-0.120641	-0.0510598	NA
chr6	6320324	6320710	387	*	2	1.3566e-12	0.000140471	0.000698424	0.00017206	0.332064	0.220494	F13A1
chr17	47991661	47991806	146	*	2	2.60455e-10	9.55979e-05	0.00379573	0.000204701	-0.132266	-0.118393	RP11-304F15.6
chr16	20359815	20360298	484	*	5	6.62761e-15	0.0016677	0.00175583	0.000223114	0.206987	0.119151	UMOD
chr18	53090572	53090930	359	*	4	5.15544e-15	0.000327594	0.00322807	0.000262583	0.204984	0.118412	TCF4
chr6	129811815	129811842	28	*	2	1.83928e-10	0.000309201	0.00070117	0.000297583	-0.180062	-0.10807	LAMA2
chr20	58632413	58632422	10	*	2	4.61912e-10	0.000372485	0.000798652	0.000356688	0.0911533	0.0689985	C20orf197
chr17	73642404	73642607	204	*	5	1.05165e-13	0.00575068	0.0038884	0.000418101	-0.131264	-0.0703683	SMIM6, RECQL5
chr10	88853758	88855085	1328	*	6	7.38124e-18	0.167083	0.00138001	0.000461889	0.197163	0.0665519	FAM35A, GLUD1
chr6	44238228	44238426	199	*	4	1.00957e-11	0.000101138	0.0238403	0.000486323	-0.245281	-0.195261	TMEM151B
chr11	65123257	65123609	353	*	3	9.95467e-11	0.000216295	0.0151437	0.000646582	0.159701	0.113688	TIGD3
chr17	43044660	43045884	1225	*	8	3.99121e-19	0.103367	0.000273099	0.000738392	-0.324236	-0.0979024	C1QL1
chr10	123871953	123873277	1325	*	8	8.94476e-14	0.00052921	0.0336928	0.000751934	-0.201589	-0.124288	TACC2
chr3	147124665	147126638	1974	*	14	7.64813e-25	0.00188542	0.000664571	0.000825043	0.164779	0.074111	ZIC1
chr8	119916509	119916546	38	*	3	1.46183e-10	0.00109837	0.00119825	0.000842254	0.120475	0.0851665	NA
chr11	73053830	73054401	572	*	4	7.81847e-12	0.00390887	0.0139314	0.000852583	0.439381	0.247013	ARHGEF17
chr3	5068037	5068731	695	*	3	8.86553e-10	0.000369195	0.0129798	0.000923426	-0.121274	-0.0787267	NA
chr9	140172089	140172277	189	*	5	1.01466e-11	0.000559365	0.0304374	0.000972973	-0.132444	-0.0976549	TOR4A
chr19	5334979	5335045	67	*	2	9.2931e-09	0.000634598	0.00536408	0.00106165	0.0945136	0.0909664	PTPRS
chr12	53298383	53298952	570	*	3	1.37886e-10	0.000328402	0.0238457	0.00108686	0.114261	0.0975058	KRT8
chr7	14942324	14943052	729	*	8	6.05161e-17	0.101901	0.000544975	0.00111227	0.285238	0.098518	DGKB
chr7	153749478	153749964	487	*	6	5.49515e-13	0.000239522	0.0188758	0.00111322	-0.348036	-0.222084	DPP6
chr4	57181252	57182417	1166	*	4	7.65855e-16	0.0277272	0.000130595	0.00113065	0.159769	0.081449	KIAA1211
chr9	23672394	23672725	332	*	3	4.53428e-09	0.000404791	0.0215954	0.00123055	0.141972	0.122994	RP11-315I14.2
chr11	120435389	120435915	527	*	3	8.76184e-11	0.000454416	0.0177334	0.00128369	0.218542	0.173753	GRIK4
chr11	4629529	4629597	69	*	2	2.62584e-08	0.00173471	0.00190531	0.00142747	-0.248667	-0.24591	NA
chr20	4981014	4981089	76	*	2	2.36142e-08	0.000734315	0.0114929	0.00145137	-0.207083	-0.156162	SLC23A2
chr3	131080483	131080579	97	*	3	5.87791e-10	0.0104972	0.00100964	0.00151235	-0.168689	-0.0653901	RP11-933H2.4
chr8	1156315	1156483	169	*	2	1.04692e-07	0.000860233	0.0132864	0.00171031	0.102561	0.0893335	CTD-2281E23.2
chr8	142428139	142428240	102	*	2	3.85031e-08	0.00101886	0.0138141	0.00198717	0.31026	0.250996	PTP4A3
chr3	2553112	2553187	76	*	3	1.60926e-09	0.00521451	0.00306805	0.00198865	-0.210278	-0.114417	CNTN4
chr12	89742886	89743281	396	*	2	1.44494e-09	0.0023897	0.00276957	0.00208458	-0.162642	-0.0986006	DUSP6
chr15	51748318	51748344	27	*	2	1.50047e-08	0.00256411	0.00269499	0.00214748	0.0839313	0.0809597	RP11-707P17.1, DMXL2
chr14	101290867	101293090	2224	*	17	1.82608e-24	0.0565049	0.00178159	0.00216699	0.233161	0.085059	MEG3
chr9	129377854	129377989	136	*	2	1.65044e-09	0.0132011	0.00104299	0.00265014	-0.13941	-0.124709	LMX1B
chr5	1201033	1201713	681	*	6	4.27152e-12	0.0140695	0.0203905	0.00281279	0.135041	0.0653739	SLC6A19
chr19	6230139	6230665	527	*	3	9.5517e-09	0.00509386	0.0113242	0.00285197	-0.123664	-0.0722929	MLLT1
chr22	26137852	26138429	578	*	7	3.83833e-12	0.000587815	0.0674398	0.00310374	-0.14655	-0.0851195	MYO18B
chr6	53013566	53013647	82	*	3	2.17138e-08	0.0264127	0.00764591	0.00317608	0.0849724	0.0533846	GCM1
chr10	102984393	102984527	135	*	2	4.76701e-09	0.066176	0.000802392	0.00319082	-0.0994925	-0.0600504	NA
chr9	124976040	124976596	557	*	2	1.134e-07	0.001667	0.0188149	0.00320795	0.0565581	0.0514501	LHX6
chr1	4830444	4831200	757	*	2	7.04988e-07	0.00224564	0.00918708	0.00329376	0.120741	0.0989045	AJAP1
chr10	65733092	65733273	182	*	2	3.90949e-08	0.166424	0.000759981	0.00330508	0.146621	0.0754398	RP11-170M17.1
chr10	22920886	22920888	3	*	2	2.63847e-07	0.00177716	0.0192627	0.00340055	-0.0989442	-0.0815568	PIP4K2A
chr1	91172337	91172930	594	*	5	5.57795e-10	0.00168605	0.0312511	0.00348404	-0.28109	-0.140973	NA
chr1	2231925	2232527	603	*	5	7.08207e-10	0.00181705	0.0292128	0.00348421	-0.0644523	-0.0476679	SKI
chr12	33591505	33591899	395	*	2	8.75101e-10	0.28291	0.00080243	0.00352297	-0.141449	-0.0716703	SYT10
chr7	97978097	97978189	93	*	2	9.29131e-07	0.00218788	0.0171067	0.00390715	-0.074663	-0.0681974	BAIAP2L1
chr19	49223814	49223845	32	*	3	1.28883e-08	0.00184493	0.0280989	0.00400799	0.0977422	0.0663113	RASIP1
chr4	113441608	113441944	337	*	2	8.86854e-08	0.00219355	0.0217171	0.00415984	-0.2072	-0.145235	RP11-402J6.1
chr5	66124167	66124801	635	*	7	8.05228e-13	0.0321716	0.0112194	0.00420003	-0.136311	-0.0728142	MAST4
chr1	38226812	38227643	832	*	4	3.61362e-11	0.0150087	0.00159769	0.00424261	0.184484	0.047923	EPHA10
chr3	35683815	35683819	5	*	2	1.16135e-06	0.00235168	0.0193542	0.00427703	-0.131776	-0.118044	ARPP21
chr3	192444927	192445594	668	*	12	1.72737e-15	0.00727415	0.0582638	0.00428074	-0.104528	-0.0659844	FGF12
chr3	186079607	186080043	437	*	5	3.69608e-11	0.157662	0.0069404	0.00469084	-0.153031	-0.0764956	DGKG
chr2	234891753	234891812	60	*	2	1.44336e-06	0.00305764	0.0137132	0.00474066	-0.146828	-0.114044	TRPM8
chr19	5828172	5829415	1244	*	6	3.82174e-08	0.00208015	0.0569206	0.00487114	-0.209853	-0.103151	NRTN
chr5	33936752	33937673	922	*	3	2.90255e-13	0.225427	0.000363685	0.0048761	0.298116	0.0863599	RXFP3
chr13	84455028	84456722	1695	*	14	2.29473e-17	0.0427544	0.0374163	0.00487816	-0.179845	-0.0814664	SLITRK1
chr15	92459058	92459857	800	*	5	5.79936e-11	0.022221	0.00167731	0.00494918	0.0708901	0.0450265	SLCO3A1
chr8	88884156	88885254	1099	*	4	2.86626e-08	0.0477159	0.00448387	0.00517685	0.131013	0.0731693	DCAF4L2
chr19	14320475	14320871	397	*	2	3.78836e-07	0.00623472	0.00581477	0.0053584	-0.210077	-0.192669	NA
chr12	91774944	91775501	558	*	4	1.95152e-09	0.0438081	0.0249021	0.00555396	-0.128877	-0.0717109	NA
chr16	2089851	2089866	16	*	2	9.92044e-07	0.00301903	0.0245569	0.00556203	-0.118797	-0.112942	NTHL1
chr20	2384240	2384367	128	*	2	1.06741e-06	0.00817137	0.00480773	0.00565498	0.0735699	0.0678568	TGM6
chr9	23765122	23765199	78	*	2	2.59434e-06	0.00320763	0.0220582	0.0056753	0.178077	0.145046	ELAVL2
chr1	209381323	209381617	295	*	2	1.97856e-07	0.0388053	0.00190603	0.00575038	0.288663	0.160557	NA
chr10	105452339	105453266	928	*	6	2.25121e-09	0.00139449	0.0681761	0.00591618	0.180445	0.113126	SH3PXD2A
chr6	35479910	35480426	517	*	3	2.77732e-09	0.0285221	0.00171885	0.00623747	-0.0831467	-0.051031	TULP1
chr17	46131332	46132018	687	*	5	1.30568e-09	0.00269307	0.047918	0.00625794	-0.0826892	-0.0677915	NFE2L1
chr8	18744446	18744513	68	*	2	3.06603e-06	0.00357249	0.023892	0.00631812	-0.131118	-0.0974311	PSD3
chr8	92260472	92260480	9	*	2	9.15077e-07	0.00692498	0.00720774	0.00634426	0.110074	0.0855983	SLC26A7
chr1	19992167	19992504	338	*	2	1.10503e-07	0.126005	0.00169193	0.00644945	0.238124	0.145696	HTR6
chr19	7982306	7982312	7	*	2	1.46438e-07	0.00363049	0.0247336	0.00646019	-0.0749095	-0.0628104	TGFBR3L
chr6	34203153	34203630	478	*	3	2.62584e-08	0.00242004	0.0458076	0.00654494	-0.119146	-0.0815734	NA
chr11	2555203	2555497	295	*	3	5.00624e-08	0.00328212	0.0322584	0.00656522	0.0725621	0.0657166	KCNQ1
chr7	121950282	121951055	774	*	5	2.1988e-10	0.00844659	0.0117907	0.0067557	0.213245	0.14285	FEZF1
chr9	135905064	135905413	350	*	4	3.90949e-08	0.00798185	0.0245117	0.00686438	0.200106	0.14554	NA
chr15	92557038	92557555	518	*	2	2.59434e-06	0.00464361	0.0168454	0.00692617	0.0924964	0.0880797	SLCO3A1
chr22	39024644	39025137	494	*	2	2.97226e-06	0.00437512	0.0192403	0.00692706	0.0944458	0.0880743	FAM227A
chr1	6105939	6106125	187	*	7	5.41604e-11	0.0111676	0.0433743	0.00698607	0.0928698	0.0633999	KCNAB2
chr15	29432016	29432143	128	*	2	3.03887e-06	0.00622435	0.0108335	0.00715439	-0.237316	-0.184141	FAM189A1
chr2	158453600	158453759	160	*	2	1.52563e-06	0.0201422	0.00358085	0.00725835	-0.154195	-0.0470592	ACVR1C
chr5	32711151	32712623	1473	*	8	1.70162e-09	0.00217937	0.079512	0.00728595	0.194605	0.132818	NPR3
chr3	154145868	154146704	837	*	4	1.11966e-10	0.122337	0.001498	0.00739538	0.206179	0.0341608	GPR149
chr15	100542595	100542628	34	*	2	5.12809e-06	0.00467346	0.0208492	0.00747041	0.110541	0.0956759	ADAMTS17
chr17	75797067	75797102	36	*	2	1.57851e-06	0.0818087	0.00221062	0.00759	0.119866	0.0731218	NA
chr7	142566816	142567588	773	*	4	2.9114e-07	0.00238378	0.0599823	0.0075929	0.091169	0.0752395	EPHB6
chr1	2723048	2723217	170	*	2	3.16908e-07	0.00596852	0.0140644	0.00774625	0.168637	0.109242	NA
chr12	54378896	54380101	1206	*	8	6.95746e-13	0.001635	0.0780945	0.00786689	0.22392	0.10004	HOXC10, RP11-834C11.12, HOXC-AS3
chr11	1975229	1975380	152	*	4	5.45543e-08	0.00306415	0.0397659	0.00812552	0.133676	0.0750662	MRPL23
chr19	45656123	45656349	227	*	2	2.03012e-07	0.00457356	0.0302843	0.00819991	-0.180133	-0.1558	MARK4, NKPD1
chr2	233352951	233353204	254	*	2	1.08173e-06	0.00483264	0.0267999	0.00827503	-0.094336	-0.0882604	NA
chr9	130497893	130498316	424	*	2	3.43111e-09	0.401799	0.00214992	0.00840649	-0.17809	-0.0889762	NA
chr1	44821797	44821812	16	*	2	4.44092e-07	0.00473373	0.0313768	0.0085086	0.0539838	0.0481282	NA
chr18	76753238	76753446	209	*	3	4.39507e-07	0.00318129	0.0543033	0.00860542	0.157784	0.131179	SALL3
chr6	155334676	155334920	245	*	3	4.1201e-07	0.00595256	0.0285833	0.00862061	-0.0737587	-0.0601779	TIAM2
chr3	32443031	32443496	466	*	3	5.22855e-07	0.00518897	0.0289627	0.00877638	-0.279173	-0.216743	CMTM7
chr17	51900238	51900887	650	*	2	1.26293e-05	0.00519725	0.0277016	0.00884152	-0.109284	-0.0894081	KIF2B
chr11	126275531	126276405	875	*	4	3.80384e-08	0.00522579	0.0263785	0.00888846	0.109179	0.0742489	ST3GAL4
chr12	121974146	121974305	160	*	2	1.05441e-06	0.00509958	0.0332284	0.0091687	-0.0870658	-0.0863153	KDM2B
chr20	61808888	61809724	837	*	5	6.06307e-10	0.0022528	0.0830833	0.00937465	0.301612	0.181595	RP5-963E22.4
chr14	37051830	37051949	120	*	3	7.41939e-07	0.00463518	0.0402306	0.0094442	0.149915	0.11335	NA
chr8	143545390	143545949	560	*	6	2.97743e-10	0.00542822	0.0569879	0.00947372	-0.194545	-0.107446	BAI1
chr19	13215151	13215729	579	*	5	4.66296e-09	0.00359088	0.0619742	0.00949742	-0.106971	-0.0816148	TRMT1
chr13	46425210	46426263	1054	*	12	8.23636e-17	0.377951	0.00806382	0.00959552	-0.163831	-0.0203156	SIAH3
chr12	52685334	52685350	17	*	2	7.0996e-06	0.0113158	0.00964527	0.009804	-0.0898208	-0.0821666	KRT86
chr11	123300871	123301090	220	*	3	1.21132e-07	0.00379748	0.0548309	0.00981268	-0.171813	-0.104556	AP000783.1
chr5	2112184	2112381	198	*	4	6.67732e-08	0.0939733	0.0151136	0.00993926	0.154231	0.0725348	NA
chr5	76507100	76507298	199	*	2	4.82194e-07	0.0155062	0.00725761	0.00997503	-0.125805	-0.106311	PDE8B
chr12	121678474	121678720	247	*	2	1.72439e-06	0.0124002	0.00903642	0.00998535	-0.052996	-0.0356526	CAMKK2
chr8	4848439	4848947	509	*	2	2.98769e-06	0.00857426	0.0148225	0.0101038	0.112091	0.00422155	CSMD1
chr20	62588672	62588769	98	*	2	2.34426e-06	0.03261	0.0044784	0.0101479	-0.0673347	-0.0454758	ZNF512B
chr8	22027621	22028118	498	*	2	4.17386e-05	0.00692983	0.0221405	0.0102041	0.0862043	0.069022	BMP1, AC105206.1
chr4	122872836	122873181	346	*	6	1.14668e-09	0.00242318	0.0919479	0.0103218	0.302436	0.206305	TRPC3
chr17	80797881	80797983	103	*	3	1.97667e-07	0.00432073	0.0491558	0.0105015	0.163202	0.116192	TBCD, ZNF750
chr7	130796017	130796242	226	*	3	5.61215e-07	0.00400729	0.0579518	0.01051	-0.119907	-0.110347	MKLN1
chr20	43374879	43374889	11	*	2	1.23377e-06	0.013688	0.00902614	0.0105406	0.0934887	0.0899035	KCNK15
chr2	219252533	219252614	82	*	3	1.69824e-06	0.00394149	0.0604901	0.0105648	-0.125304	-0.112711	SLC11A1
chr14	37124018	37124063	46	*	2	4.05208e-06	0.0185004	0.00726477	0.0108965	0.302785	0.181859	RP11-964E11.2
chr19	11300505	11300651	147	*	2	9.63257e-06	0.00999204	0.0143916	0.0110125	-0.165699	-0.128679	KANK2
chr9	124979184	124979356	173	*	3	1.65706e-06	0.0044052	0.0575938	0.0111942	-0.153599	-0.147364	LHX6
chr9	129388668	129389125	458	*	2	1.43954e-05	0.00683843	0.0319789	0.0114057	-0.16313	-0.117781	LMX1B
chr15	49716247	49716645	399	*	3	8.85974e-09	0.00701557	0.0389637	0.0114357	0.110863	0.0817302	FGF7, FAM227B
chr5	66254316	66255020	705	*	6	1.36132e-10	0.0621621	0.0469257	0.0114964	-0.140292	-0.0883484	MAST4
chr8	55533655	55534103	449	*	7	3.90874e-11	0.280631	0.00781924	0.0116365	0.152892	0.0464459	RP1
chr4	183726897	183727013	117	*	2	8.939e-06	0.00831193	0.0232248	0.0118301	-0.289215	-0.238138	NA
chr14	95513543	95513854	312	*	2	2.29133e-06	0.0524825	0.00448117	0.0118487	0.103419	0.0689131	NA
chr7	2959105	2959121	17	*	2	1.82402e-05	0.00728255	0.0316471	0.0119279	0.194209	0.163965	CARD11
chr19	14889425	14889720	296	*	2	3.07375e-06	0.0157553	0.00986518	0.0119377	-0.126225	-0.0996873	NA
chr7	132261287	132262526	1240	*	9	1.84469e-11	0.00288546	0.0886594	0.0119385	-0.23081	-0.149879	PLXNA4
chr1	3072001	3072643	643	*	3	2.05911e-08	0.226294	0.00167594	0.0119631	0.0641243	0.0289141	PRDM16
chr10	65028743	65029168	426	*	7	7.13277e-10	0.00274131	0.10779	0.0120299	-0.13056	-0.0857449	JMJD1C
chr8	21645807	21646946	1140	*	5	1.91645e-08	0.0184984	0.0629252	0.0120808	-0.316534	-0.146585	GFRA2
chr2	85538759	85538792	34	*	3	9.15228e-07	0.0142714	0.00962702	0.0120846	0.141579	0.0792488	NA
chr17	7111414	7111551	138	*	3	1.397e-06	0.0132147	0.0218025	0.0122419	0.0436217	0.0390718	DLG4
chr15	37307385	37307513	129	*	3	1.37065e-06	0.00887941	0.0211574	0.0122943	0.100472	0.0669956	MEIS2
chr16	30661534	30661850	317	*	4	3.83123e-08	0.0958804	0.016008	0.0124147	0.0698917	0.0371257	NA
chr19	38876094	38877220	1127	*	5	1.77774e-08	0.0034825	0.0645755	0.0124201	-0.156459	-0.0922528	AC005789.9, GGN
chr12	5020693	5021107	415	*	3	9.15228e-07	0.00672343	0.0434599	0.0124583	0.166926	0.132533	KCNA1
chr2	10666662	10666713	52	*	2	2.08113e-05	0.00713976	0.0394933	0.0125482	0.0622327	0.0555521	NA
chr12	122238983	122240036	1054	*	6	6.26338e-10	0.00893363	0.0487212	0.0126285	0.185951	0.134008	RP11-347I19.8, RHOF, AC084018.1
chr7	129464585	129464924	340	*	2	1.65707e-05	0.00777709	0.0326599	0.0126619	-0.0838287	-0.069386	NA
chr14	103294574	103294740	167	*	2	7.60773e-06	0.00775666	0.0334091	0.0127273	-0.124172	-0.122272	TRAF3
chr20	6750956	6751435	480	*	3	1.35394e-07	0.0702593	0.00285271	0.0128534	-0.0895632	-0.0242838	BMP2
chr16	67233247	67233861	615	*	4	5.38211e-08	0.0192711	0.0490233	0.0130202	0.0824797	0.0455092	ELMO3
chr10	120788373	120788696	324	*	2	4.2656e-06	0.00834698	0.0309265	0.0131177	-0.0942029	-0.0840495	NA
chr20	61162099	61162216	118	*	4	1.70106e-07	0.016164	0.0386394	0.0135224	0.0991431	0.0644602	C20orf166, MIR133A2
chr7	111425406	111425428	23	*	2	1.57481e-05	0.00774041	0.0432479	0.0137168	0.120556	0.104569	DOCK4
chr20	42875546	42876091	546	*	7	8.8365e-11	0.0090081	0.0224397	0.0137176	-0.238154	-0.112022	GDAP1L1
chr1	228468349	228468624	276	*	3	2.93244e-06	0.00559421	0.0621421	0.0137418	0.0845065	0.064126	OBSCN
chr12	46776356	46776425	70	*	3	3.00397e-06	0.00559524	0.0627882	0.0137537	-0.0992697	-0.0725289	NA
chr14	86088124	86088696	573	*	4	2.2669e-08	0.0101719	0.021162	0.0138979	-0.107156	-0.0419887	FLRT2
chr1	2850682	2850737	56	*	2	2.60727e-05	0.00900537	0.0323314	0.0140849	0.131435	0.115282	NA
chr5	153852690	153852934	245	*	3	4.67254e-07	0.0227029	0.00865081	0.0141113	-0.094395	-0.0778415	NA
chr10	4358517	4358813	297	*	2	2.8238e-05	0.00833725	0.0427723	0.0144935	0.113697	0.104686	NA
chr1	91190366	91190891	526	*	4	9.43953e-10	0.0681839	0.00378792	0.0145556	-0.187714	-0.0286268	NA
chr5	124036927	124037002	76	*	3	2.83457e-06	0.0060166	0.0635814	0.0146393	0.113091	0.100753	ZNF608
chr19	55963862	55964383	522	*	3	3.27966e-06	0.0246287	0.0318804	0.0147474	-0.130775	-0.115571	ISOC2
chr1	42801572	42801761	190	*	5	7.54063e-09	0.140429	0.0254886	0.0150055	0.0582407	0.0311253	RP11-223A3.1
chr11	63766286	63766546	261	*	2	2.69826e-06	0.0400568	0.00728641	0.0152508	-0.129565	-0.0681994	OTUB1, MACROD1
chr16	82044788	82045140	353	*	2	4.96335e-06	0.0131149	0.020804	0.0154361	0.0850223	0.0710562	SDR42E1
chr5	140772148	140772859	712	*	5	1.55062e-08	0.00935472	0.0528105	0.015467	-0.207592	-0.149298	PCDHGA1, PCDHGA2, PCDHGA3, PCDHGB1, PCDHGA4, PCDHGB2, PCDHGA5, PCDHGB3, PCDHGA6, PCDHGA7, PCDHGB4, PCDHGA8
chr2	45878977	45879684	708	*	6	3.84917e-14	0.624116	0.000139821	0.0155315	-0.147211	-0.0286668	PRKCE
chr9	118915832	118915907	76	*	3	1.10791e-06	0.0463617	0.0179454	0.0155841	0.0856125	0.0554184	NA
chr1	1558726	1559155	430	*	3	3.29669e-07	0.0209452	0.033316	0.0155902	0.0909043	0.0639542	MIB2
chr6	65443615	65443645	31	*	2	3.75602e-05	0.00949992	0.0394644	0.0156401	0.100596	0.0976847	EYS, RP11-307F22.2
chr9	124133079	124133094	16	*	2	2.22797e-05	0.0118935	0.0253402	0.015704	0.141164	0.115063	NA
chr2	145147129	145147665	537	*	6	5.69278e-09	0.00921298	0.0770658	0.0157794	0.103342	0.0706405	ZEB2
chr17	56274480	56274597	118	*	2	2.05384e-05	0.28323	0.00455572	0.015872	0.199344	0.097244	EPX
chr17	73727879	73727957	79	*	2	4.23426e-05	0.00916924	0.0458277	0.0159236	-0.0697952	-0.0420177	ITGB4
chr10	134664629	134664752	124	*	2	1.15313e-05	0.00922834	0.0467057	0.0160917	0.106316	0.098895	TTC40
chr19	41112158	41112379	222	*	2	1.50802e-06	0.0185659	0.014936	0.0162819	0.116167	0.0773933	LTBP4
chr16	777189	778351	1163	*	3	1.26062e-08	0.0295879	0.0075406	0.0164619	-0.140522	-0.0952237	HAGHL
chr1	22211074	22211317	244	*	2	8.65273e-06	0.243446	0.00483704	0.0165373	-0.0229961	-0.0160372	HSPG2
chr20	44636981	44637511	531	*	3	1.00928e-06	0.0397467	0.0327107	0.0166463	-0.151823	-0.0852927	NA
chr15	71185252	71185336	85	*	2	2.53742e-05	0.00973197	0.0458922	0.0166835	-0.0792541	-0.0501497	LRRC49
chr4	13536504	13536991	488	*	3	5.89213e-08	0.129289	0.0178901	0.0167544	-0.133095	0.00228161	NA
chr16	1313283	1313625	343	*	2	8.9865e-07	0.0108125	0.0365086	0.0167954	0.132311	0.0936954	PRSS29P
chr19	5799340	5799374	35	*	2	3.35806e-05	0.0114006	0.0337857	0.0169922	-0.124512	-0.0947757	NA
chr6	31105337	31106941	1605	*	11	1.41483e-12	0.254162	0.0382671	0.0171085	0.223221	0.0167344	PSORS1C1, PSORS1C2
chr16	55091144	55091198	55	*	2	2.00641e-05	0.00988298	0.0484661	0.0171571	-0.0646169	-0.00786184	NA
chr5	161117337	161117384	48	*	2	4.03154e-05	0.014309	0.0242182	0.0174441	-0.116231	-0.0885848	GABRA6
chr10	48439216	48439452	237	*	8	1.09791e-10	0.163263	0.0334027	0.0176366	-0.128233	-0.0652259	NA
chr6	75911716	75911956	241	*	3	1.97467e-07	0.011667	0.0441984	0.0179177	0.121058	0.0996933	COL12A1
chr5	159398670	159398860	191	*	2	1.62425e-05	0.0103877	0.0500863	0.0180063	-0.156312	-0.130974	ADRA1B
chr12	104443742	104444060	319	*	3	3.0645e-06	0.017845	0.0190716	0.018957	-0.146593	-0.102692	GLT8D2
chr5	140174449	140174841	393	*	3	1.79282e-07	0.02086	0.0259718	0.0191915	0.19865	0.133325	PCDHA1, PCDHA2
chr19	16254474	16254516	43	*	4	8.11962e-07	0.0156201	0.0515546	0.0191927	0.0783745	0.0544054	HSH2D
chr3	187453973	187454376	404	*	3	2.32064e-07	0.0624641	0.0180951	0.0193505	-0.110067	-0.0671955	BCL6
chr2	215275973	215276156	184	*	2	2.26869e-05	0.0114973	0.0525799	0.0197603	0.0746154	0.0644319	VWC2L, AC107218.3
chr22	45705034	45705042	9	*	2	3.31603e-05	0.0424806	0.0104884	0.0198446	-0.0894103	-0.0474889	FAM118A
chr14	101157950	101158251	302	*	4	2.15636e-07	0.0329648	0.0113871	0.0204867	0.234045	0.0919265	NA
chr11	35440136	35440252	117	*	2	1.60699e-05	0.0152064	0.0335115	0.0207546	-0.0845688	-0.0697864	SLC1A2
chr7	21582444	21582758	315	*	3	9.92016e-08	0.0748483	0.00511162	0.0209936	-0.183007	-0.0879265	NA
chr9	138628212	138628673	462	*	5	2.54269e-07	0.00682977	0.0991526	0.0211602	0.123011	0.0832791	KCNT1
chr9	77230441	77230509	69	*	2	4.15497e-05	0.0641175	0.00943293	0.0215059	0.116486	0.0422946	RORB
chr1	18962937	18963477	541	*	3	4.2315e-06	0.0199709	0.0459366	0.0217103	-0.28141	-0.154322	PAX7
chr19	8642308	8642370	63	*	2	3.87457e-05	0.111648	0.00788511	0.0219652	0.134734	0.0800887	MYO1F
chr14	52734156	52735421	1266	*	8	8.6313e-12	0.144363	0.0174893	0.0225652	0.273044	0.112564	PTGDR
chr11	17801046	17801276	231	*	2	2.55344e-05	0.0294579	0.0175555	0.0228172	0.121292	0.0831223	KCNC1
chr9	32782655	32783202	548	*	2	1.25838e-05	0.0137662	0.055172	0.0230187	-0.159273	-0.140123	NA
chr1	207992403	207992548	146	*	3	1.06415e-06	0.0307123	0.0145751	0.0230727	-0.232113	-0.113659	C1orf132
chr19	46094030	46094912	883	*	6	1.86494e-07	0.0212795	0.0497852	0.0235273	0.129901	0.0426395	OPA3, GPR4
chr1	53544139	53544584	446	*	4	2.18939e-06	0.0359997	0.0702323	0.0238559	0.0755306	0.0515259	PODN, RP11-334A14.5
chr2	74725206	74725208	3	*	2	1.20189e-05	0.0472072	0.0131981	0.0240203	-0.230401	-0.184869	LBX2
chr1	6240392	6241179	788	*	5	1.18421e-08	0.017802	0.050591	0.0241789	0.107223	0.0667214	NA
chr12	6664536	6665447	912	*	5	4.32485e-08	0.0121722	0.0774204	0.0242417	-0.126325	-0.0875412	IFFO1
chr4	52916851	52916930	80	*	2	3.02937e-05	0.0147684	0.0550371	0.0242553	0.117746	0.106693	NA
chr12	49726661	49726893	233	*	3	2.227e-05	0.0112703	0.0747131	0.0245876	-0.180808	-0.161021	C1QL4
chr14	22314958	22315075	118	*	2	3.27409e-05	0.112309	0.00913057	0.0245921	0.0498379	0.037155	TRAV8-2
chr11	130319691	130319736	46	*	2	2.0155e-05	0.0247341	0.0247415	0.0247711	-0.122665	-0.0800265	ADAMTS15
chr1	156046344	156046546	203	*	2	4.33966e-06	0.146149	0.00861706	0.024841	-0.0981535	-0.065609	MEX3A
chr5	140236081	140236873	793	*	2	1.31104e-05	0.0198174	0.0338691	0.0249097	0.0831337	0.0752431	PCDHA1, PCDHA2, PCDHA3, PCDHA4, PCDHA5, PCDHA6, PCDHA7, PCDHA8, PCDHA9, PCDHA10
chr10	7745191	7745293	103	*	2	3.89658e-05	0.0509942	0.0133217	0.024942	0.14739	0.0420428	ITIH2
chr1	3102750	3103106	357	*	3	7.36196e-06	0.0339966	0.0189254	0.0260389	0.145493	0.107698	PRDM16
chr3	13860477	13860812	336	*	4	2.39893e-06	0.186057	0.0541116	0.026321	-0.0635687	-0.0310688	WNT7A
chr11	15780562	15780634	73	*	2	2.93376e-05	0.0331362	0.0206635	0.0265428	0.0938419	0.0608804	NA
chr15	89951184	89951404	221	*	2	3.46702e-06	0.0535165	0.0143151	0.0266415	-0.0889812	-0.0784712	NA
chr1	6551705	6551782	78	*	2	1.47637e-05	0.0158533	0.0643896	0.0268899	-0.0810315	-0.0741846	PLEKHG5
chr5	140261653	140261663	11	*	2	3.42923e-05	0.0159104	0.0639078	0.0269011	0.145949	0.144853	PCDHA1, PCDHA2, PCDHA3, PCDHA4, PCDHA5, PCDHA6, PCDHA7, PCDHA8, PCDHA9, PCDHA10, PCDHA11, PCDHA12
chr9	34380890	34381386	497	*	4	1.14497e-07	0.394705	0.0266993	0.0269395	-0.0925904	-0.0357915	C9orf24
chr22	29427488	29427709	222	*	3	5.12633e-06	0.0138476	0.0626143	0.0271491	-0.0818061	-0.0561261	ZNRF3
chr7	150758219	150758260	42	*	2	3.69753e-05	0.200034	0.00913663	0.0273526	-0.200935	-0.108495	SLC4A2
chr7	1576976	1577016	41	*	2	3.53865e-05	0.0175985	0.055243	0.0276617	0.0657101	0.0456291	MAFK
chr17	32909164	32909292	129	*	2	4.26208e-05	0.427118	0.00867839	0.0278337	-0.144227	-0.0717084	TMEM132E
chr6	36665270	36665611	342	*	4	6.67318e-07	0.138838	0.00508426	0.0279077	-0.0663225	-0.034402	NA
chr3	133749257	133749309	53	*	3	1.88696e-05	0.018877	0.0603804	0.0282217	-0.101156	-0.0757422	SLCO2A1
chr7	12250161	12250308	148	*	2	1.90956e-05	0.0179021	0.0584276	0.0285499	0.25208	0.189676	NA
chr6	90660913	90661373	461	*	6	7.99505e-09	0.053153	0.0691065	0.0286699	0.108537	0.054008	RP3-512E2.2, BACH2
chr8	65286329	65287050	722	*	7	2.83192e-11	0.314776	0.0112257	0.0287572	-0.156151	0.000638453	LINC00966
chr9	140008784	140008995	212	*	3	1.30718e-05	0.0121791	0.0929345	0.0289541	0.234587	0.207658	DPP7
chr5	168199824	168200348	525	*	4	7.58335e-07	0.106214	0.0165053	0.0290098	0.12841	0.0677889	SLIT3
chr18	49866214	49867273	1060	*	8	6.96105e-11	0.22855	0.0202578	0.0290514	0.304298	0.0886041	DCC
chr3	21792195	21792248	54	*	2	3.00358e-05	0.0579492	0.0156655	0.0291569	-0.137434	-0.106243	ZNF385D
chr22	43817258	43817384	127	*	3	1.71694e-05	0.0346143	0.0437503	0.0296379	-0.103218	-0.0905983	MPPED1
chr9	80263219	80263602	384	*	3	4.94922e-07	0.0246815	0.0317141	0.0302189	-0.116252	-0.0998792	GNA14
chr1	26680590	26680734	145	*	3	1.62122e-05	0.0212562	0.061755	0.0304753	0.0950626	0.0729287	AIM1L
chr5	176519331	176519455	125	*	2	1.29578e-05	0.0184293	0.0677786	0.0306314	-0.0555777	-0.0335919	FGFR4
chr16	29818682	29819572	891	*	7	1.68996e-09	0.0137278	0.106601	0.031781	-0.106916	-0.0773157	MAZ, AC009133.15
chr10	50506748	50507214	467	*	8	4.05971e-10	0.0515683	0.0546596	0.0321657	0.0591234	0.0324157	C10orf71, C10orf71-AS1
chr8	65291287	65291341	55	*	2	3.83107e-05	0.0203709	0.0645149	0.0324706	0.180918	0.0252676	LINC00966
chr11	27744049	27744759	711	*	5	4.95516e-09	0.161801	0.00790176	0.0324869	-0.142095	-0.0739691	RP11-587D21.4
chr7	27212357	27212870	514	*	6	3.83876e-09	0.542665	0.0160646	0.0331799	0.182116	0.0752409	RP1-170O19.20, HOXA10
chr19	16284242	16284351	110	*	4	4.79307e-06	0.0834067	0.0640935	0.0333642	0.0618893	-0.00823946	CIB3
chr5	59188920	59189724	805	*	5	4.92377e-08	0.029304	0.0718024	0.0338375	0.232098	0.142392	PDE4D
chr8	140631116	140631269	154	*	3	1.23023e-05	0.0244149	0.0648298	0.0339564	0.152137	0.112162	KCNK9
chr16	680877	681022	146	*	3	4.42229e-05	0.0151448	0.101234	0.035061	-0.0933102	-0.0850938	WFIKKN1
chr12	66275403	66276974	1572	*	9	3.30069e-08	0.3503	0.0127822	0.0351132	-0.128216	-0.0270563	HMGA2, RP11-366L20.2
chr17	4805931	4805986	56	*	3	6.88928e-06	0.03169	0.0624049	0.0356246	-0.0823734	-0.0613332	C17orf107, CHRNE
chr18	3879131	3879303	173	*	2	4.83621e-05	0.026729	0.0529791	0.0365708	-0.115624	-0.00239904	DLGAP1-AS3, DLGAP1
chr2	12880542	12880961	420	*	4	4.51038e-06	0.420686	0.0336271	0.0370514	0.10307	0.0533562	TRIB2
chr4	144542195	144542240	46	*	3	5.25604e-05	0.0171384	0.0976593	0.037759	0.0972216	0.0799418	GUSBP5, FREM3
chr1	3607097	3607425	329	*	4	3.43223e-06	0.0139785	0.116765	0.0380302	0.0854943	0.0786035	TP73
chr1	47696212	47696701	490	*	5	3.42941e-09	0.323035	0.0189629	0.0386176	0.180049	0.0980189	RP1-18D14.7, TAL1
chr2	169658881	169659182	302	*	5	1.36095e-06	0.0132002	0.121418	0.0387798	-0.146649	-0.0806434	NOSTRIN
chr17	40687226	40687596	371	*	3	6.26248e-06	0.0502075	0.0225175	0.0391731	-0.129025	-0.0730174	NA
chr3	13028592	13028650	59	*	4	9.9155e-06	0.0138513	0.118234	0.0392012	0.0866547	0.0747809	IQSEC1
chr17	46114237	46114933	697	*	6	2.89371e-08	0.0379253	0.0936428	0.0397704	-0.15295	-0.0839283	COPZ2, MIR152
chr5	140798971	140799305	335	*	3	3.70555e-06	0.225303	0.00747717	0.0398378	-0.110267	-0.0494942	PCDHGA1, PCDHGA2, PCDHGA3, PCDHGB1, PCDHGA4, PCDHGB2, PCDHGA5, PCDHGB3, PCDHGA6, PCDHGA7, PCDHGB4, PCDHGA8, PCDHGA9, PCDHGB6, PCDHGA10, PCDHGB7
chr1	230468611	230468699	89	*	3	3.25574e-05	0.0237618	0.0660466	0.0399712	0.0592992	0.0494547	PGBD5
chr14	101201611	101201649	39	*	2	1.72029e-05	0.234814	0.0149205	0.0413534	0.0908611	0.0578022	NA
chr3	107810678	107810791	114	*	4	1.77846e-07	0.0281937	0.0717748	0.042003	-0.0867971	-0.061513	NA
chr2	45181635	45181829	195	*	3	3.27476e-05	0.0316594	0.0494964	0.0431722	-0.162069	-0.0763328	AC012354.6
chr1	166916762	166917009	248	*	3	7.93124e-06	0.400619	0.00597929	0.0437343	-0.0741046	-0.0491815	ILDR2
chr7	157809235	157809500	266	*	5	1.94423e-06	0.0251015	0.0934325	0.0440413	0.144621	0.0994681	PTPRN2
chr18	31803067	31804000	934	*	10	5.68965e-12	0.141084	0.0291514	0.0445099	0.151638	0.0758179	RP11-379L18.1, NOL4
chr2	193059230	193059717	488	*	4	9.91506e-07	0.0414787	0.0721899	0.0447159	0.225099	0.147057	TMEFF2
chr6	28554157	28554334	178	*	4	9.4334e-07	0.0182746	0.107967	0.0452126	0.0738182	0.0549368	SCAND3
chr4	16362422	16362823	402	*	4	9.63257e-06	0.0778332	0.0770469	0.0453181	0.124749	0.082461	ZEB2P1
chr6	32906460	32906532	73	*	3	2.60454e-05	0.185087	0.0108748	0.0456202	0.155266	0.0719836	HLA-DMB, XXbac-BPG181M17.5
chr11	111807548	111808104	557	*	4	1.85277e-05	0.0161212	0.131884	0.045911	-0.232011	-0.16801	DIXDC1
chr1	162336877	162337375	499	*	5	2.34426e-06	0.0512179	0.0799198	0.0462916	0.0904044	0.0690886	NOS1AP, RP11-565P22.6, C1orf226
chr6	69345836	69346003	168	*	3	2.6813e-05	0.0960846	0.0158046	0.0465235	-0.106086	-0.0641893	BAI3
chr19	57630340	57630742	403	*	5	1.22814e-07	0.064418	0.0298626	0.0470439	-0.181026	-0.115223	USP29
chr6	31548437	31548599	163	*	4	1.87906e-05	0.192058	0.0874147	0.0477035	-0.255818	-0.156871	LTB
chr2	118982056	118982679	624	*	4	5.07833e-06	0.0305542	0.0957247	0.0480751	-0.0892668	-0.0583737	NA
chr20	39316634	39317034	401	*	2	3.56304e-06	0.0377768	0.06042	0.0485614	0.218943	0.129642	MAFB
chr7	44105050	44105434	385	*	4	1.1556e-05	0.0331912	0.0986687	0.0488382	-0.116704	-0.0737474	DBNL, AC017116.11, PGAM2
chr11	13983784	13984544	761	*	7	7.41796e-09	0.152125	0.101513	0.049737	-0.144943	-0.078365	SPON1
chr6	155537595	155538155	561	*	7	8.17367e-08	0.0117203	0.163638	0.0507387	0.119859	0.0784769	TIAM2
chr2	219738226	219738714	489	*	4	6.96379e-06	0.0309652	0.0848126	0.0508875	-0.321684	-0.18927	WNT6
chr6	158437741	158438929	1189	*	11	2.65327e-12	0.100475	0.0377464	0.0517843	-0.0752714	-0.0382471	SYNJ2
chr3	46759335	46759698	364	*	6	4.34058e-07	0.108211	0.095986	0.0528674	-0.156318	-0.0666505	PRSS50
chr2	176981328	176982230	903	*	7	1.0841e-11	0.964148	0.000306998	0.0532905	0.259957	0.0443713	HOXD10
chr18	74962359	74962794	436	*	5	1.74539e-08	0.631439	0.00716675	0.0537798	-0.216766	-0.0657326	GALR1
chr10	130757223	130757336	114	*	3	3.28985e-05	0.305477	0.00918862	0.0544936	0.155435	0.083178	RP11-442O18.1
chr1	93342890	93342963	74	*	3	3.39915e-05	0.0380254	0.0733605	0.0545508	-0.112638	-0.0750398	FAM69A
chr2	171572525	171572863	339	*	3	3.24985e-05	0.456307	0.00874905	0.0552576	-0.100889	-0.000612298	SP5
chr5	115298252	115299071	820	*	6	4.06961e-08	0.0435079	0.086576	0.0564538	0.188258	0.0874407	AQPEP
chr12	111618936	111619455	520	*	7	5.49156e-09	0.182685	0.0292356	0.0604672	0.145415	0.0269642	CUX2
chr2	176973275	176973690	416	*	3	4.72786e-07	0.254108	0.0135771	0.061433	0.158361	0.0818411	HOXD11, AC009336.1, HOXD10
chr5	140762229	140762315	87	*	4	1.62425e-05	0.0411221	0.0892973	0.0636149	0.125931	0.0789552	PCDHGA1, PCDHGA2, PCDHGA3, PCDHGB1, PCDHGA4, PCDHGB2, PCDHGA5, PCDHGB3, PCDHGA6
chr16	51187536	51188129	594	*	4	1.6546e-05	0.0919796	0.0905255	0.0637726	0.172546	0.116623	NA
chr10	73848230	73849167	938	*	6	7.55986e-07	0.0596737	0.126074	0.0649945	-0.126677	-0.0691161	SPOCK2
chr19	13947162	13947914	753	*	7	3.49845e-08	0.0444656	0.113679	0.0654771	-0.0663613	-0.04212	MIR24-2, MIR27A, MIR23A
chr6	10410916	10411372	457	*	2	3.20694e-06	0.0539212	0.0714524	0.0655013	0.0712144	0.0613467	TFAP2A-AS1, TFAP2A
chr14	101530856	101532938	2083	*	17	1.71811e-11	0.554559	0.0432964	0.0668005	0.16175	0.0482852	MIR541, MIR409, MIR412, MIR369, MIR410
chr18	55108852	55108965	114	*	2	1.18488e-05	0.0643481	0.0608596	0.0672816	0.146353	0.0394536	ONECUT2
chr3	181422202	181422217	16	*	2	4.43078e-05	0.0426766	0.111661	0.0673111	-0.128527	-0.110386	SOX2-OT
chr4	114681544	114681688	145	*	2	1.14288e-05	0.0441442	0.105353	0.067486	-0.104881	-0.0881408	CAMK2D
chr1	227506868	227507059	192	*	2	2.12709e-05	0.0429147	0.111899	0.0676319	-0.117065	-0.105626	NA
chr11	113258277	113258469	193	*	4	4.07013e-05	0.0520599	0.106071	0.0681958	-0.170651	-0.101518	NA
chr14	77506705	77506731	27	*	2	2.63591e-05	0.0445552	0.1104	0.0691212	-0.133172	-0.120392	NA
chr12	89744471	89744701	231	*	6	4.34058e-07	0.0434739	0.0591204	0.0698273	-0.165516	-0.0560133	DUSP6
chr1	34628843	34629559	717	*	4	1.00592e-06	0.758945	0.00372343	0.0698932	0.22585	0.0595424	CSMD2
chr11	109963246	109963583	338	*	3	6.33309e-06	0.0577417	0.084059	0.0699779	-0.165404	-0.131972	NA
chr11	31822302	31822341	40	*	2	2.97089e-05	0.0762925	0.0598096	0.0731804	-0.10366	-0.0909291	PAX6
chr3	181444368	181444999	632	*	5	1.6345e-06	0.101583	0.0412996	0.0733985	-0.0808824	-0.0239488	SOX2-OT
chr17	71160748	71162159	1412	*	10	1.55062e-08	0.0147636	0.191267	0.0744267	-0.251578	-0.119966	RP11-143K11.5, SSTR2
chr11	69633959	69634400	442	*	6	5.12892e-08	0.12423	0.0315503	0.0761432	-0.130968	-0.0551819	NA
chr16	57831837	57832085	249	*	5	1.20826e-05	0.0376949	0.136305	0.078848	0.0841027	0.0461404	KIFC3
chr5	167689140	167689737	598	*	7	4.32665e-08	0.145457	0.0772277	0.0793134	0.148154	0.0677888	TENM2
chr12	54942945	54943545	601	*	7	2.92213e-07	0.054055	0.146677	0.0794018	-0.206755	-0.108596	PDE1B
chr15	90171643	90171885	243	*	6	1.15441e-06	0.173428	0.0749355	0.0803278	-0.0524826	-0.0283015	TICRR, KIF7
chr1	217262889	217262978	90	*	3	2.74127e-05	0.0493006	0.112153	0.0808641	-0.118734	-0.0697752	ESRRG
chr5	44388487	44388799	313	*	3	2.52388e-05	0.0526909	0.108587	0.082379	0.145121	0.021603	FGF10
chr5	122430476	122431121	646	*	4	5.69893e-06	0.0382353	0.143249	0.0829256	0.191468	0.125117	PRDM6
chr16	86602083	86602471	389	*	3	1.83056e-05	0.37579	0.0156518	0.0831784	0.125801	0.049836	FOXC2
chr2	68882249	68882627	379	*	5	2.297e-07	0.682568	0.00320629	0.0887999	-0.153965	-0.0494417	PROKR1
chr11	8832111	8832938	828	*	8	5.66798e-07	0.0445267	0.165756	0.0894294	-0.0930725	-0.0639141	ST5
chr1	161059267	161059654	388	*	7	2.90819e-07	0.158213	0.13193	0.0897161	0.0908861	0.0525254	PVRL4
chr2	25142391	25142523	133	*	3	1.63534e-05	0.149953	0.063592	0.0899608	-0.081098	-0.0685161	ADCY3
chr6	29598695	29599331	637	*	9	5.9618e-10	0.116009	0.0539152	0.0919743	-0.0898653	-0.0306785	GABBR1
chr10	129845660	129846082	423	*	5	2.27837e-05	0.259816	0.117867	0.0924044	-0.119231	-0.0683746	PTPRE
chr6	43253015	43253153	139	*	3	2.55309e-05	0.115062	0.065254	0.0934681	-0.084804	-0.0476984	TTBK1
chr2	80531500	80532419	920	*	14	2.66499e-13	0.752794	0.066828	0.0963401	-0.0905474	-0.0235882	CTNNA2, LRRTM1
chr17	46682308	46683047	740	*	7	2.93244e-06	0.0232521	0.212242	0.0988507	-0.140646	-0.0476436	HOXB-AS3, HOXB6
chr13	95364062	95364993	932	*	11	1.67032e-09	0.118604	0.10729	0.0994758	0.215085	0.136907	SOX21-AS1, SOX21
chr12	25055967	25056243	277	*	5	2.54682e-05	0.0466388	0.174777	0.102226	-0.0795944	-0.064534	AC026310.1, BCAT1
chr17	18759255	18759701	447	*	5	2.49484e-05	0.0535201	0.142662	0.102918	-0.0693963	-0.0330812	PRPSAP2
chr3	116164242	116164943	702	*	8	1.56355e-07	0.176649	0.132173	0.105948	0.107322	0.00678818	LSAMP
chr11	118135109	118135691	583	*	5	1.1556e-05	0.0567223	0.175826	0.106248	-0.10508	-0.0612149	MPZL2
chr5	142784522	142784982	461	*	2	4.19357e-05	0.0859655	0.127983	0.113965	-0.0208588	-0.0199389	NR3C1
chr6	30130881	30131283	403	*	5	1.54829e-05	0.368956	0.0399944	0.114735	0.116017	0.0107789	TRIM15
chr4	174912071	174912278	208	*	5	2.11743e-05	0.178623	0.105056	0.115535	-0.188769	-0.0813343	NA
chr2	220299484	220299659	176	*	6	2.53532e-05	0.0330445	0.216613	0.116153	-0.149269	-0.116688	SPEG
chr3	32022763	32023722	960	*	10	1.39193e-08	0.0716781	0.16209	0.116987	-0.166077	-0.0872923	ZNF860, OSBPL10
chr15	23892574	23892770	197	*	3	2.67152e-05	0.0850664	0.114762	0.117576	0.136817	0.0411087	NA
chr17	2169502	2169522	21	*	2	4.64066e-05	0.0798922	0.157645	0.118799	-0.0658737	-0.0548095	SMG6
chr2	50574196	50575037	842	*	9	2.17056e-09	0.227184	0.0671388	0.120503	-0.240412	-0.119731	NRXN1
chr14	101505926	101506819	894	*	9	2.74591e-07	0.137046	0.141701	0.120914	0.0763048	0.0278519	MIR376C, MIR654
chr1	228400217	228401186	970	*	4	7.85142e-06	0.0567867	0.174987	0.122714	0.159054	0.143215	OBSCN, C1orf145
chr16	14402939	14403425	487	*	7	3.27766e-06	0.128814	0.151952	0.126425	-0.0877035	-0.0402987	RP11-65J21.3, MIR365A
chr12	54446944	54448090	1147	*	13	1.299e-11	0.373444	0.0181191	0.126797	0.087266	0.0402966	HOXC4, HOXC4
chr1	202129192	202129204	13	*	2	5.23286e-05	0.0862188	0.165355	0.127486	-0.0312599	-0.0281691	PTPN7
chr12	116997022	116997308	287	*	6	1.96091e-05	0.104644	0.139424	0.130662	-0.100238	-0.057961	MAP1LC3B2
chr1	39874390	39875069	680	*	13	5.89734e-10	0.0306974	0.210699	0.130884	-0.191414	-0.0992815	MACF1
chr6	12717138	12717192	55	*	2	4.74319e-05	0.180529	0.0855843	0.134967	0.0809368	0.0633992	NA
chr14	74706016	74706196	181	*	6	2.4689e-05	0.174752	0.168985	0.135176	0.0864349	0.0470417	VSX2
chr5	140718526	140719360	835	*	8	1.77721e-07	0.0819687	0.147323	0.137137	0.121346	-0.0136051	PCDHGA1, PCDHGA2
chr2	182549353	182550065	713	*	7	1.88522e-07	0.470653	0.0258425	0.137195	0.168759	0.0543487	AC013733.3
chr22	46465717	46465977	261	*	5	1.32869e-05	0.253411	0.111272	0.137677	-0.119016	-0.0714522	FLJ27365, RP6-109B7.4
chr5	148521075	148521623	549	*	9	1.72746e-08	0.598891	0.11185	0.138335	-0.106089	-0.0309565	ABLIM3
chr3	6902100	6903921	1822	*	14	4.25437e-09	0.804461	0.0384181	0.14072	0.17291	-0.0135946	GRM7
chr7	15725862	15726649	788	*	6	9.29131e-07	0.369298	0.00909143	0.140863	0.158543	0.0341176	MEOX2
chr1	12538341	12538678	338	*	6	2.21097e-05	0.12202	0.174578	0.143092	-0.0452824	-0.0317532	VPS13D
chr6	32974924	32975352	429	*	7	6.76403e-07	0.0602525	0.20535	0.145281	0.0919101	0.0671879	HLA-DOA
chr11	46957977	46958372	396	*	6	1.96484e-05	0.149957	0.134243	0.14631	-0.148116	-0.0308401	C11orf49
chr18	30352782	30353289	508	*	9	9.77525e-08	0.35906	0.0757136	0.149316	0.161594	0.0508492	AC012123.1, KLHL14
chr16	82660317	82660727	411	*	12	5.93595e-09	0.171411	0.175273	0.156758	-0.128391	-0.0517492	CDH13
chr13	96085969	96086275	307	*	6	1.48293e-05	0.384822	0.0749947	0.159874	0.150394	0.0408513	CLDN10
chr13	50706810	50707427	618	*	6	1.36539e-05	0.0617012	0.215598	0.162623	-0.180182	-0.076551	DLEU1
chr4	41750181	41750864	684	*	8	7.19748e-09	0.939322	0.00539419	0.164198	-0.176622	-0.040551	RP11-227F19.1, PHOX2B
chr6	134210253	134211217	965	*	9	8.62675e-07	0.56139	0.0645458	0.164591	-0.136577	-0.0412781	TCF21, RP3-323P13.2
chr5	161274751	161275745	995	*	10	3.09117e-09	0.491057	0.0818251	0.18517	-0.103064	-0.0334989	GABRA1
chr3	181428462	181428697	236	*	6	4.08099e-06	0.341243	0.118669	0.187726	-0.165952	-0.0772416	SOX2-OT
chr7	154002270	154002618	349	*	6	1.11616e-06	0.839279	0.00735392	0.196783	-0.143648	-0.0309291	DPP6
chr13	49821654	49822056	403	*	9	3.24953e-07	0.798715	0.0209407	0.201664	-0.114977	-0.0297045	CDADC1
chr4	84456671	84457956	1286	*	19	5.08923e-12	0.0418169	0.268746	0.227695	-0.262399	-0.140808	AGPAT9
chr7	86416062	86416314	253	*	5	1.25376e-05	0.449537	0.0811978	0.229222	0.18805	0.0536751	GRM3
chr12	49371628	49372474	847	*	11	6.78762e-08	0.430811	0.11051	0.247285	-0.103406	-0.045329	WNT1
chr16	28995843	28996533	691	*	8	2.87629e-06	0.762103	0.11014	0.253797	-0.0452086	-0.0214922	SPNS1, RP11-264B17.3, LAT
chr1	25228687	25229192	506	*	8	1.41022e-05	0.283435	0.164042	0.267805	0.118992	0.0408863	RUNX3
chr6	32054561	32055146	586	*	8	1.28845e-05	0.494267	0.136546	0.270061	-0.100446	-0.0192479	TNXB
chr3	37033625	37034495	871	*	15	1.98326e-09	0.104163	0.209776	0.281711	0.188661	0.092089	EPM2AIP1
chr20	57426240	57428309	2070	*	31	1.67841e-16	0.392591	0.17654	0.303089	-0.0688544	-0.0125948	GNAS
chr1	44398868	44399776	909	*	7	1.47927e-06	0.755574	0.0633783	0.332351	-0.0943892	-0.0329822	ARTN
chr2	119604901	119606055	1155	*	11	7.51572e-08	0.761008	0.063695	0.333906	-0.169432	-0.0596862	EN1
chr20	57463330	57465775	2446	*	35	8.96186e-16	0.378726	0.243312	0.358821	-0.0560601	-0.0206962	GNAS, RP1-309F20.3
chr3	62860802	62861631	830	*	10	4.00153e-06	0.831745	0.124456	0.371339	-0.105623	-0.0244639	CADPS
chr16	54964332	54965142	811	*	11	9.31934e-06	0.176952	0.28008	0.396149	0.140217	0.0904991	IRX5
chr10	100993553	100994143	591	*	8	1.34487e-05	0.737998	0.188058	0.398934	-0.130443	-0.0591698	HPSE2
chr17	7757969	7759060	1092	*	12	3.35726e-07	0.295356	0.236606	0.427727	-0.122057	-0.0488127	KDM6B, TMEM88
chr20	36148133	36149455	1323	*	15	3.30092e-07	0.464661	0.269062	0.493767	-0.0413682	-0.0171328	BLCAP
chr12	119419329	119419786	458	*	5	2.95623e-05	0.886596	0.159305	0.498733	0.30976	0.112229	SRRM4
chr6	30038955	30039466	512	*	13	1.43007e-05	0.221081	0.382452	0.588899	-0.124574	-0.0599489	RNF39

## Sheet: Table S3
MissMethyl FDR significant GO and KEGG Terms.
TISSUE	ONTOLOGY	TERM	N	DE	P.DE	FDR
Placenta	CC	cell periphery	5134	2822	1.40411e-25	3.14058e-21
Placenta	BP	anatomical structure morphogenesis	2497	1584	3.37625e-23	3.77583e-19
Placenta	BP	system development	4418	2582	4.0147e-22	2.35147e-18
Placenta	CC	plasma membrane	4697	2575	4.20526e-22	2.35147e-18
Placenta	BP	anatomical structure development	5380	3051	3.29841e-20	1.47551e-16
Placenta	BP	multicellular organism development	4929	2826	4.35753e-20	1.62441e-16
Placenta	BP	multicellular organismal process	6805	3667	1.5983e-19	5.10702e-16
Placenta	BP	cell adhesion	1325	839	8.79117e-18	2.4579e-14
Placenta	BP	biological adhesion	1331	842	9.9351e-18	2.46909e-14
Placenta	BP	developmental process	5817	3231	3.20425e-17	7.16694e-14
Placenta	BP	cell communication	5778	3123	5.32458e-17	1.08268e-13
Placenta	BP	signaling	5768	3120	7.42914e-17	1.38473e-13
Placenta	BP	animal organ development	3195	1858	7.84548e-16	1.34985e-12
Placenta	CC	cell junction	1906	1189	9.73854e-16	1.55587e-12
Placenta	CC	intrinsic component of plasma membrane	1526	901	1.13836e-15	1.69744e-12
Placenta	BP	cell differentiation	3832	2185	3.55267e-15	4.96641e-12
Placenta	CC	integral component of plasma membrane	1451	857	5.30023e-15	6.67962e-12
Placenta	BP	cell-cell signaling	1554	969	5.37547e-15	6.67962e-12
Placenta	BP	locomotion	1732	1053	2.01491e-14	2.37197e-11
Placenta	BP	regulation of multicellular organismal process	2487	1454	3.73119e-14	4.17278e-11
Placenta	BP	regulation of localization	2533	1473	4.7719e-14	5.08253e-11
Placenta	BP	nervous system development	2199	1371	6.29944e-14	6.40453e-11
Placenta	BP	cellular developmental process	3903	2209	8.00824e-14	7.78784e-11
Placenta	BP	movement of cell or subcellular component	1999	1200	1.50919e-13	1.40651e-10
Placenta	BP	regulation of cellular component movement	975	622	6.31174e-13	5.64698e-10
Placenta	BP	cell development	1913	1176	7.87719e-13	6.77651e-10
Placenta	BP	signal transduction	5305	2828	1.06486e-12	8.82141e-10
Placenta	BP	animal organ morphogenesis	977	650	1.63231e-12	1.28314e-09
Placenta	BP	tissue development	1828	1097	1.66366e-12	1.28314e-09
Placenta	BP	cell morphogenesis	948	637	1.94849e-12	1.45273e-09
Placenta	CC	cell projection	2117	1243	2.05851e-12	1.48525e-09
Placenta	BP	regulation of locomotion	942	597	2.80546e-12	1.96093e-09
Placenta	BP	regulation of signaling	3180	1818	3.20882e-12	2.1749e-09
Placenta	BP	cell-cell adhesion	782	498	4.55705e-12	2.99787e-09
Placenta	BP	regulation of cell communication	3145	1796	5.47394e-12	3.49816e-09
Placenta	BP	neuron differentiation	1287	836	6.80944e-12	4.23074e-09
Placenta	BP	generation of neurons	1425	916	8.50473e-12	5.14122e-09
Placenta	BP	neurogenesis	1530	975	9.98163e-12	5.87524e-09
Placenta	CC	plasma membrane bounded cell projection	2023	1185	1.03885e-11	5.95796e-09
Placenta	BP	regulation of cell motility	903	571	1.33177e-11	7.4469e-09
Placenta	BP	actin filament-based process	740	485	2.5768e-11	1.38162e-08
Placenta	MF	actin binding	415	289	2.67515e-11	1.38162e-08
Placenta	BP	cell motility	1546	924	2.73321e-11	1.38162e-08
Placenta	BP	localization of cell	1546	924	2.73321e-11	1.38162e-08
Placenta	BP	cell migration	1385	842	2.77967e-11	1.38162e-08
Placenta	CC	plasma membrane region	1139	700	2.93442e-11	1.42683e-08
Placenta	BP	taxis	586	388	3.73214e-11	1.7761e-08
Placenta	BP	regulation of developmental process	2281	1354	4.4672e-11	2.08162e-08
Placenta	BP	cell morphogenesis involved in differentiation	683	471	4.85316e-11	2.21532e-08
Placenta	CC	synapse	1198	760	5.33271e-11	2.38554e-08
Placenta	BP	chemotaxis	584	386	6.10523e-11	2.67756e-08
Placenta	BP	cell junction organization	644	440	1.05184e-10	4.52431e-08
Placenta	BP	synaptic signaling	665	436	1.20273e-10	5.07031e-08
Placenta	BP	tube development	992	636	1.22411e-10	5.07031e-08
Placenta	BP	system process	1865	1032	2.05117e-10	8.34155e-08
Placenta	BP	positive regulation of developmental process	1167	729	2.10948e-10	8.42547e-08
Placenta	BP	cell junction assembly	391	279	2.40036e-10	9.18254e-08
Placenta	BP	chemical synaptic transmission	639	419	2.42218e-10	9.18254e-08
Placenta	BP	anterograde trans-synaptic signaling	639	419	2.42218e-10	9.18254e-08
Placenta	BP	regulation of cell migration	846	533	2.66453e-10	9.93294e-08
Placenta	BP	trans-synaptic signaling	645	422	3.95307e-10	1.42865e-07
Placenta	BP	regulation of cell adhesion	673	430	4.06823e-10	1.42865e-07
Placenta	BP	regulation of multicellular organismal development	1259	775	4.1037e-10	1.42865e-07
Placenta	BP	anatomical structure formation involved in morphogenesis	1048	659	4.14671e-10	1.42865e-07
Placenta	BP	regulation of signal transduction	2798	1585	4.15176e-10	1.42865e-07
Placenta	BP	cell fate commitment	240	187	4.39264e-10	1.48864e-07
Placenta	BP	cell surface receptor signaling pathway	2724	1526	5.35893e-10	1.789e-07
Placenta	BP	embryonic morphogenesis	547	381	7.47128e-10	2.4575e-07
Placenta	BP	circulatory system development	1028	647	9.99445e-10	3.2398e-07
Placenta	BP	skeletal system development	462	324	1.0669e-09	3.40906e-07
Placenta	CC	intrinsic component of membrane	4658	2302	1.46511e-09	4.6155e-07
Placenta	CC	extracellular matrix	506	319	1.72853e-09	5.36972e-07
Placenta	CC	actin cytoskeleton	477	315	1.82212e-09	5.58292e-07
Placenta	CC	external encapsulating structure	507	319	2.17765e-09	6.5821e-07
Placenta	BP	positive regulation of cellular process	5075	2751	2.54073e-09	7.57712e-07
Placenta	CC	neuron projection	1228	752	2.65372e-09	7.80997e-07
Placenta	BP	actin cytoskeleton organization	648	420	3.47843e-09	1.01042e-06
Placenta	BP	regulation of molecular function	2864	1577	9.33706e-09	2.64957e-06
Placenta	BP	cell projection morphogenesis	625	429	9.35826e-09	2.64957e-06
Placenta	BP	response to stimulus	7929	4002	9.78963e-09	2.73706e-06
Placenta	BP	enzyme linked receptor protein signaling pathway	997	612	1.01438e-08	2.80108e-06
Placenta	CC	integral component of membrane	4510	2220	1.17834e-08	3.20644e-06
Placenta	MF	cytoskeletal protein binding	924	566	1.18985e-08	3.20644e-06
Placenta	BP	tube morphogenesis	814	520	1.30123e-08	3.42088e-06
Placenta	BP	plasma membrane bounded cell projection morphogenesis	621	426	1.3149e-08	3.42088e-06
Placenta	BP	regulation of cell differentiation	1483	888	1.31531e-08	3.42088e-06
Placenta	BP	external encapsulating structure organization	371	250	1.70668e-08	4.38774e-06
Placenta	BP	neuron development	1048	666	1.80244e-08	4.58127e-06
Placenta	BP	epithelium development	1151	686	1.86445e-08	4.68564e-06
Placenta	BP	neuron projection development	920	593	1.91556e-08	4.76059e-06
Placenta	BP	positive regulation of biological process	5581	2969	1.97432e-08	4.8527e-06
Placenta	BP	regulation of response to stimulus	3698	1995	2.19446e-08	5.33517e-06
Placenta	BP	extracellular matrix organization	368	248	2.42325e-08	5.82805e-06
Placenta	BP	regulation of biological quality	3651	1977	2.71985e-08	6.47178e-06
Placenta	BP	neuron projection guidance	267	201	2.75229e-08	6.48004e-06
Placenta	BP	regulation of transmembrane transport	516	333	3.03272e-08	7.06592e-06
Placenta	BP	extracellular structure organization	369	248	3.34298e-08	7.7085e-06
Placenta	CC	collagen-containing extracellular matrix	382	243	3.42071e-08	7.80725e-06
Placenta	BP	neuron projection morphogenesis	607	415	3.7262e-08	8.41858e-06
Placenta	BP	central nervous system development	914	584	3.80501e-08	8.49132e-06
Placenta	BP	axon guidance	266	200	3.83432e-08	8.49132e-06
Placenta	BP	cellular component morphogenesis	725	480	4.31808e-08	9.37273e-06
Placenta	CC	plasma membrane protein complex	544	342	4.3379e-08	9.37273e-06
Placenta	BP	axon development	474	329	4.35804e-08	9.37273e-06
Placenta	CC	cell-cell junction	450	300	4.56109e-08	9.716e-06
Placenta	BP	axonogenesis	435	307	4.65563e-08	9.82381e-06
Placenta	BP	cellular response to stimulus	6623	3393	5.7809e-08	1.20842e-05
Placenta	BP	positive regulation of response to stimulus	1988	1089	6.32765e-08	1.31047e-05
Placenta	BP	urogenital system development	305	216	6.49216e-08	1.3322e-05
Placenta	BP	behavior	510	328	6.62965e-08	1.34805e-05
Placenta	BP	cell part morphogenesis	640	432	6.98066e-08	1.40663e-05
Placenta	BP	regulation of ion transmembrane transport	511	328	7.30344e-08	1.45854e-05
Placenta	BP	cell projection organization	1482	887	7.44492e-08	1.47363e-05
Placenta	BP	plasma membrane bounded cell projection organization	1443	868	7.59003e-08	1.48918e-05
Placenta	BP	regulation of catalytic activity	2271	1250	8.01566e-08	1.55901e-05
Placenta	BP	blood vessel development	668	424	9.38225e-08	1.80908e-05
Placenta	BP	sensory organ development	515	342	9.64789e-08	1.8444e-05
Placenta	BP	positive regulation of molecular function	1602	916	1.35502e-07	2.56845e-05
Placenta	BP	positive regulation of cell communication	1580	901	1.39342e-07	2.61904e-05
Placenta	BP	cell morphogenesis involved in neuron differentiation	547	374	1.43345e-07	2.67183e-05
Placenta	MF	gated channel activity	316	210	1.4766e-07	2.72952e-05
Placenta	BP	sensory organ morphogenesis	237	172	1.56156e-07	2.8629e-05
Placenta	BP	secretion	1342	738	1.59882e-07	2.90738e-05
Placenta	BP	tissue morphogenesis	607	400	1.63474e-07	2.94873e-05
Placenta	CC	leading edge membrane	165	124	1.69871e-07	3.0396e-05
Placenta	BP	positive regulation of signaling	1586	903	1.85061e-07	3.28513e-05
Placenta	BP	positive regulation of cellular component movement	527	331	1.87735e-07	3.30636e-05
Placenta	BP	epithelial cell differentiation	673	398	1.90453e-07	3.32802e-05
Placenta	MF	metal ion transmembrane transporter activity	404	261	2.58954e-07	4.48994e-05
Placenta	CC	synaptic membrane	342	236	3.00806e-07	5.17548e-05
Placenta	CC	cell surface	729	418	3.05409e-07	5.21457e-05
Placenta	BP	positive regulation of phosphorus metabolic process	897	532	3.12208e-07	5.2505e-05
Placenta	BP	positive regulation of phosphate metabolic process	897	532	3.12208e-07	5.2505e-05
Placenta	CC	receptor complex	378	245	3.239e-07	5.40648e-05
Placenta	BP	positive regulation of cell motility	515	322	3.51614e-07	5.7985e-05
Placenta	BP	embryo development	943	597	3.52571e-07	5.7985e-05
Placenta	BP	cell-substrate adhesion	337	227	3.57822e-07	5.84191e-05
Placenta	BP	positive regulation of cell differentiation	777	485	3.63292e-07	5.88822e-05
Placenta	CC	cell leading edge	390	262	3.83861e-07	6.15559e-05
Placenta	BP	positive regulation of locomotion	528	329	3.85292e-07	6.15559e-05
Placenta	CC	cell projection membrane	321	209	4.00517e-07	6.35255e-05
Placenta	BP	cation transport	1057	604	4.033e-07	6.35255e-05
Placenta	BP	vasculature development	697	436	4.3421e-07	6.79159e-05
Placenta	BP	blood vessel morphogenesis	601	379	4.57725e-07	7.10967e-05
Placenta	BP	intracellular signal transduction	2457	1371	4.72284e-07	7.28523e-05
Placenta	CC	anchoring junction	776	482	5.59211e-07	8.56704e-05
Placenta	BP	signal release	443	282	5.90215e-07	8.98051e-05
Placenta	BP	regulation of transport	1601	907	6.29115e-07	9.50771e-05
Placenta	BP	embryonic organ development	398	275	6.57804e-07	9.87457e-05
Placenta	BP	regulation of MAPK cascade	638	389	6.63745e-07	9.89732e-05
Placenta	BP	regulation of small GTPase mediated signal transduction	290	202	6.94507e-07	0.000102874
Placenta	BP	G protein-coupled receptor signaling pathway	1012	510	7.81248e-07	0.000114962
Placenta	BP	positive regulation of signal transduction	1422	810	7.97446e-07	0.000116578
Placenta	MF	signaling receptor activity	1106	555	8.74073e-07	0.000126132
Placenta	MF	molecular transducer activity	1106	555	8.74073e-07	0.000126132
Placenta	MF	passive transmembrane transporter activity	442	270	9.01505e-07	0.000129256
Placenta	BP	MAPK cascade	827	493	1.00169e-06	0.000142706
Placenta	BP	regulation of system process	536	339	1.07838e-06	0.000152659
Placenta	BP	response to chemical	4025	2081	1.10121e-06	0.00015491
Placenta	MF	channel activity	441	269	1.12657e-06	0.000157487
Placenta	CC	glutamatergic synapse	288	203	1.18782e-06	0.000165018
Placenta	BP	positive regulation of cell adhesion	396	250	1.33001e-06	0.000183631
Placenta	BP	connective tissue development	234	167	1.52094e-06	0.000208705
Placenta	CC	myofibril	213	143	1.54258e-06	0.000210383
Placenta	BP	cartilage development	180	133	1.76855e-06	0.00023974
Placenta	BP	response to growth factor	679	424	1.84055e-06	0.000247997
Placenta	BP	wound healing	488	302	1.87988e-06	0.00025178
Placenta	BP	response to endogenous stimulus	1494	862	1.95567e-06	0.000260372
Placenta	BP	cell-cell adhesion via plasma-membrane adhesion molecules	221	153	2.09239e-06	0.000276926
Placenta	BP	regulation of cell population proliferation	1491	848	2.19851e-06	0.00028926
Placenta	BP	positive regulation of cell migration	493	307	2.31958e-06	0.000303403
Placenta	BP	cellular response to growth factor stimulus	653	409	2.34681e-06	0.000305181
Placenta	BP	cellular response to endogenous stimulus	1270	748	2.89365e-06	0.000374117
Placenta	BP	negative regulation of multicellular organismal process	949	551	2.99408e-06	0.000384877
Placenta	BP	export from cell	1273	698	3.46739e-06	0.000443173
Placenta	CC	I band	126	94	3.49921e-06	0.000444698
Placenta	CC	sarcomere	192	130	3.52002e-06	0.000444815
Placenta	BP	positive regulation of catalytic activity	1291	739	3.70109e-06	0.000465069
Placenta	BP	response to oxygen-containing compound	1511	839	3.72793e-06	0.000465825
Placenta	CC	ion channel complex	285	189	4.18172e-06	0.000516785
Placenta	MF	extracellular matrix structural constituent	154	108	4.18197e-06	0.000516785
Placenta	BP	secretion by cell	1223	670	4.21812e-06	0.000517186
Placenta	BP	positive regulation of phosphorylation	834	494	4.2387e-06	0.000517186
Placenta	BP	heart development	512	336	4.25458e-06	0.000517186
Placenta	BP	response to external stimulus	2439	1271	4.41903e-06	0.000534273
Placenta	BP	kidney epithelium development	126	100	4.47268e-06	0.000537852
Placenta	BP	renal system development	274	191	4.68857e-06	0.000560798
Placenta	CC	adherens junction	164	122	4.74003e-06	0.00056188
Placenta	BP	transmembrane receptor protein tyrosine kinase signaling pathway	692	420	4.74785e-06	0.00056188
Placenta	BP	response to wounding	598	364	5.19301e-06	0.000611326
Placenta	BP	regulation of postsynaptic membrane potential	126	93	5.22401e-06	0.000611756
Placenta	BP	regulation of cellular process	9818	4937	5.90176e-06	0.000687525
Placenta	BP	regulation of cell-substrate adhesion	204	143	5.95337e-06	0.000689943
Placenta	CC	postsynapse	568	368	6.0766e-06	0.000700594
Placenta	MF	ion channel activity	402	248	6.32994e-06	0.00072606
Placenta	BP	kidney development	266	185	6.42005e-06	0.000732639
Placenta	BP	cell population proliferation	1740	978	6.57533e-06	0.000746551
Placenta	MF	signaling receptor binding	1417	775	6.72353e-06	0.000759521
Placenta	BP	regulation of body fluid levels	460	278	6.86078e-06	0.000771131
Placenta	BP	supramolecular fiber organization	666	405	7.06147e-06	0.000789719
Placenta	MF	cation channel activity	315	202	7.41068e-06	0.00082465
Placenta	CC	neuronal cell body	439	280	7.59313e-06	0.00084077
Placenta	BP	eye development	343	229	8.17938e-06	0.000901223
Placenta	BP	cation transmembrane transport	807	470	8.30241e-06	0.000905181
Placenta	BP	appendage morphogenesis	131	103	8.33671e-06	0.000905181
Placenta	BP	limb morphogenesis	131	103	8.33671e-06	0.000905181
Placenta	MF	transmembrane signaling receptor activity	934	461	8.42616e-06	0.000910473
Placenta	BP	regulation of kinase activity	837	498	8.66165e-06	0.000931419
Placenta	BP	epithelial cell development	194	137	8.8047e-06	0.000942272
Placenta	BP	regulation of ion transport	1210	692	8.90491e-06	0.000948458
Placenta	MF	calcium ion binding	626	370	9.21818e-06	0.000977171
Placenta	CC	somatodendritic compartment	766	474	9.29858e-06	0.000981044
Placenta	BP	sensory system development	353	235	9.62052e-06	0.00100865
Placenta	CC	ruffle membrane	92	71	9.6504e-06	0.00100865
Placenta	CC	transmembrane transporter complex	306	199	9.74535e-06	0.00101383
Placenta	BP	positive regulation of cell population proliferation	836	489	9.8311e-06	0.00101802
Placenta	BP	response to organic substance	2970	1582	1.05183e-05	0.00107719
Placenta	BP	small GTPase mediated signal transduction	458	297	1.05537e-05	0.00107719
Placenta	MF	voltage-gated cation channel activity	134	100	1.05868e-05	0.00107719
Placenta	MF	DNA-binding transcription activator activity, RNA polymerase II-specific	418	276	1.06148e-05	0.00107719
Placenta	CC	Z disc	116	87	1.065e-05	0.00107719
Placenta	BP	peptidyl-tyrosine phosphorylation	346	220	1.06914e-05	0.00107719
Placenta	BP	modulation of chemical synaptic transmission	384	256	1.0865e-05	0.00108732
Placenta	BP	cardiac ventricle development	113	89	1.09268e-05	0.00108732
Placenta	BP	embryonic organ morphogenesis	270	191	1.09379e-05	0.00108732
Placenta	MF	cell adhesion molecule binding	519	323	1.09932e-05	0.00108799
Placenta	BP	response to lipid	803	459	1.17593e-05	0.00115868
Placenta	BP	neurotransmitter transport	194	134	1.2322e-05	0.0012088
Placenta	CC	contractile fiber	220	144	1.25755e-05	0.00122828
Placenta	BP	ossification	375	246	1.28296e-05	0.00124765
Placenta	BP	regulation of intracellular signal transduction	1624	913	1.31632e-05	0.00127455
Placenta	MF	DNA-binding transcription activator activity	422	278	1.32662e-05	0.00127899
Placenta	BP	regulation of chemotaxis	201	135	1.33672e-05	0.0012832
Placenta	BP	synapse assembly	155	114	1.37435e-05	0.00131368
Placenta	MF	voltage-gated ion channel activity	186	130	1.39262e-05	0.00131986
Placenta	MF	voltage-gated channel activity	186	130	1.39262e-05	0.00131986
Placenta	BP	protein phosphorylation	1480	843	1.40368e-05	0.0013204
Placenta	BP	regulation of trans-synaptic signaling	385	256	1.405e-05	0.0013204
Placenta	BP	visual system development	347	230	1.43839e-05	0.00134613
Placenta	BP	regulation of protein phosphorylation	1104	633	1.51177e-05	0.0014038
Placenta	BP	heart morphogenesis	230	164	1.51257e-05	0.0014038
Placenta	BP	positive regulation of multicellular organismal process	1262	728	1.5453e-05	0.00142826
Placenta	CC	transporter complex	321	206	1.58998e-05	0.00146122
Placenta	BP	regulation of anatomical structure morphogenesis	913	559	1.59404e-05	0.00146122
Placenta	BP	circulatory system process	561	343	1.61974e-05	0.00147872
Placenta	BP	peptidyl-tyrosine modification	349	221	1.66786e-05	0.00151043
Placenta	BP	regulation of phosphate metabolic process	1472	829	1.67473e-05	0.00151043
Placenta	BP	regulation of phosphorus metabolic process	1472	829	1.67473e-05	0.00151043
Placenta	BP	regulation of secretion	573	340	1.69738e-05	0.00152471
Placenta	BP	angiogenesis	516	320	1.72676e-05	0.0015449
Placenta	BP	regulation of actin filament-based process	363	232	1.76106e-05	0.00156931
Placenta	BP	muscle organ morphogenesis	69	56	1.79748e-05	0.0015954
Placenta	BP	regulation of cell-cell adhesion	402	243	1.85081e-05	0.00162837
Placenta	BP	prostate gland epithelium morphogenesis	23	23	1.85512e-05	0.00162837
Placenta	BP	response to purine-containing compound	135	93	1.85646e-05	0.00162837
Placenta	BP	homophilic cell adhesion via plasma membrane adhesion molecules	126	92	1.86715e-05	0.00163048
Placenta	BP	regulation of cation transmembrane transport	306	199	1.87344e-05	0.00163048
Placenta	BP	blood circulation	482	297	1.96999e-05	0.00170786
Placenta	BP	synapse organization	372	251	2.01184e-05	0.00173029
Placenta	CC	cation channel complex	214	147	2.01492e-05	0.00173029
Placenta	BP	cardiac ventricle morphogenesis	69	57	2.01926e-05	0.00173029
Placenta	BP	nervous system process	1101	582	2.02681e-05	0.00173029
Placenta	BP	eye morphogenesis	138	102	2.07701e-05	0.0017664
Placenta	CC	membrane	8126	3981	2.11217e-05	0.0017895
Placenta	BP	actin filament organization	406	258	2.15506e-05	0.00181896
Placenta	BP	glial cell differentiation	199	141	2.21581e-05	0.0018632
Placenta	BP	camera-type eye development	297	200	2.24041e-05	0.00187682
Placenta	BP	response to cAMP	88	65	2.3379e-05	0.00195119
Placenta	BP	cellular response to organic substance	2441	1322	2.41646e-05	0.00200925
Placenta	BP	response to estradiol	121	85	2.47317e-05	0.00204206
Placenta	BP	positive regulation of protein phosphorylation	754	443	2.47417e-05	0.00204206
Placenta	BP	inorganic cation transmembrane transport	699	407	2.87037e-05	0.00235132
Placenta	BP	cellular response to chemical stimulus	2976	1580	2.87146e-05	0.00235132
Placenta	MF	growth factor binding	134	97	2.88041e-05	0.00235132
Placenta	BP	positive regulation of MAPK cascade	478	292	2.94814e-05	0.00239786
Placenta	CC	cell cortex	286	189	2.9676e-05	0.00240414
Placenta	BP	regulation of phosphorylation	1283	727	2.98666e-05	0.00240414
Placenta	BP	response to organonitrogen compound	957	547	2.99247e-05	0.00240414
Placenta	BP	regulation of membrane potential	402	252	2.99886e-05	0.00240414
Placenta	BP	response to organic cyclic compound	829	480	3.1993e-05	0.00255567
Placenta	BP	developmental growth	557	356	3.25221e-05	0.00258869
Placenta	BP	ERK1 and ERK2 cascade	281	178	3.34052e-05	0.00264956
Placenta	BP	cardiac chamber morphogenesis	114	89	3.37488e-05	0.00266734
Placenta	BP	learning or memory	221	151	3.55373e-05	0.00279528
Placenta	BP	muscle tissue morphogenesis	64	52	3.56174e-05	0.00279528
Placenta	BP	regulation of biological process	10454	5185	3.65286e-05	0.00285677
Placenta	CC	presynapse	459	294	3.82003e-05	0.0029771
Placenta	BP	gland development	393	256	3.84023e-05	0.00298244
Placenta	BP	response to nitrogen compound	1019	577	3.95635e-05	0.003062
Placenta	BP	synaptic transmission, glutamatergic	86	67	4.13439e-05	0.00318876
Placenta	BP	muscle structure development	560	354	4.36719e-05	0.00335673
Placenta	BP	inorganic ion transmembrane transport	785	449	4.50504e-05	0.00345083
Placenta	BP	camera-type eye morphogenesis	111	84	4.89323e-05	0.00373539
Placenta	BP	head development	698	440	4.98955e-05	0.00379334
Placenta	CC	main axon	60	50	5.00306e-05	0.00379334
Placenta	BP	regulation of cell junction assembly	177	128	5.04973e-05	0.00381579
Placenta	BP	regulation of secretion by cell	523	311	5.25715e-05	0.00395914
Placenta	BP	retina development in camera-type eye	141	101	5.36064e-05	0.00402354
Placenta	BP	cardiac chamber development	150	112	5.38579e-05	0.0040289
Placenta	BP	ventricular cardiac muscle tissue development	50	42	5.44585e-05	0.00406024
Placenta	CC	postsynaptic membrane	246	168	5.50938e-05	0.00409396
Placenta	BP	transmembrane receptor protein serine/threonine kinase signaling pathway	332	216	5.53306e-05	0.00409795
Placenta	BP	platelet degranulation	111	74	5.61157e-05	0.00414237
Placenta	BP	cardiac muscle tissue morphogenesis	56	46	5.6724e-05	0.00417335
Placenta	BP	response to organophosphorus	121	83	5.69085e-05	0.00417335
Placenta	BP	embryonic limb morphogenesis	110	86	5.76479e-05	0.00420004
Placenta	BP	embryonic appendage morphogenesis	110	86	5.76479e-05	0.00420004
Placenta	BP	prostate gland development	39	34	5.79906e-05	0.00421129
Placenta	BP	brain development	660	417	5.90022e-05	0.00427088
Placenta	BP	actin filament-based movement	141	101	5.9234e-05	0.00427383
Placenta	BP	potassium ion transmembrane transport	199	135	6.02112e-05	0.00432961
Placenta	BP	regulation of ERK1 and ERK2 cascade	264	167	6.03943e-05	0.00432961
Placenta	BP	appendage development	163	121	6.08531e-05	0.00433471
Placenta	BP	limb development	163	121	6.08531e-05	0.00433471
Placenta	BP	renal system process	108	77	6.11034e-05	0.00433873
Placenta	BP	potassium ion transport	219	146	6.28193e-05	0.00444645
Placenta	BP	positive regulation of transcription by RNA polymerase II	1110	670	6.49834e-05	0.00458512
Placenta	BP	positive regulation of hydrolase activity	707	413	6.6743e-05	0.00469447
Placenta	BP	chondrocyte differentiation	101	79	6.75217e-05	0.00472946
Placenta	BP	negative regulation of developmental process	810	487	6.76634e-05	0.00472946
Placenta	BP	prostate gland morphogenesis	25	24	6.84113e-05	0.00476684
Placenta	BP	regulation of neuron differentiation	183	134	7.2806e-05	0.0050573
Placenta	BP	positive regulation of kinase activity	564	341	7.37348e-05	0.00510596
Placenta	BP	forebrain development	339	227	7.60708e-05	0.00525147
Placenta	BP	substrate adhesion-dependent cell spreading	107	77	7.63895e-05	0.00525725
Placenta	BP	cell adhesion mediated by integrin	71	53	7.68698e-05	0.00527407
Placenta	MF	phosphotransferase activity, alcohol group as acceptor	625	382	7.97858e-05	0.00545664
Placenta	BP	positive regulation of peptidyl-tyrosine phosphorylation	177	115	8.00187e-05	0.00545664
Placenta	BP	regulation of hydrolase activity	1171	648	8.06762e-05	0.00548475
Placenta	BP	endothelial cell migration	235	154	8.58659e-05	0.00581988
Placenta	BP	cytoskeleton organization	1296	734	8.9984e-05	0.00608058
Placenta	MF	phosphatidylinositol-3,4,5-trisphosphate binding	37	32	9.09794e-05	0.00611252
Placenta	BP	negative regulation of cell adhesion	264	167	9.10033e-05	0.00611252
Placenta	BP	gland morphogenesis	108	81	9.80271e-05	0.00656459
Placenta	BP	muscle tissue development	343	227	9.96818e-05	0.00665547
Placenta	BP	morphogenesis of a branching epithelium	165	122	0.000101092	0.00672952
Placenta	BP	morphogenesis of a branching structure	177	130	0.00010221	0.0067838
Placenta	BP	striated muscle tissue development	326	216	0.000108561	0.00715433
Placenta	BP	cell surface receptor signaling pathway involved in cell-cell signaling	579	364	0.000108588	0.00715433
Placenta	BP	cell activation	1269	663	0.000108753	0.00715433
Placenta	CC	catenin complex	32	29	0.000112256	0.00736313
Placenta	BP	negative regulation of cell differentiation	593	364	0.000113188	0.00740258
Placenta	BP	neural retina development	68	53	0.000115019	0.00750039
Placenta	MF	neuropeptide receptor activity	39	30	0.00011778	0.00765808
Placenta	BP	regulation of epithelial cell differentiation	148	101	0.000118488	0.00766064
Placenta	CC	cell body	506	309	0.000118504	0.00766064
Placenta	CC	presynaptic membrane	127	95	0.00012116	0.00780978
Placenta	BP	ventricular cardiac muscle tissue morphogenesis	44	37	0.000124125	0.00797788
Placenta	BP	regulation of neurotransmitter levels	196	131	0.000127286	0.0081367
Placenta	BP	nephron epithelium development	101	79	0.000127324	0.0081367
Placenta	BP	negative regulation of cell communication	1291	733	0.0001293	0.00823947
Placenta	BP	regulation of plasma membrane bounded cell projection organization	574	360	0.000131571	0.00836036
Placenta	BP	cognition	257	168	0.000137301	0.00869973
Placenta	BP	negative regulation of signaling	1294	734	0.000143064	0.00903931
Placenta	BP	positive regulation of intracellular signal transduction	914	517	0.000143928	0.00906826
Placenta	BP	regulation of nervous system development	391	259	0.000148684	0.00934163
Placenta	BP	regulation of hormone secretion	244	155	0.000151413	0.00948644
Placenta	BP	regulation of peptidyl-tyrosine phosphorylation	242	150	0.000154343	0.009643
Placenta	CC	voltage-gated potassium channel complex	86	65	0.000159409	0.00993176
Placenta	BP	regulation of Ras protein signal transduction	174	119	0.000164897	0.0102452
Placenta	BP	regulation of cellular response to growth factor stimulus	268	176	0.000166221	0.0102988
Placenta	BP	regulation of transmembrane transporter activity	244	159	0.00016863	0.0104192
Placenta	MF	collagen binding	66	50	0.000170239	0.0104599
Placenta	BP	organ growth	141	102	0.000170921	0.0104599
Placenta	MF	potassium channel activity	116	83	0.000171508	0.0104599
Placenta	BP	actin-mediated cell contraction	112	80	0.000171721	0.0104599
Placenta	BP	positive regulation of secretion by cell	256	158	0.000172468	0.0104599
Placenta	BP	Ras protein signal transduction	307	197	0.000172532	0.0104599
Placenta	MF	actin filament binding	201	134	0.000172563	0.0104599
Placenta	MF	cation transmembrane transporter activity	585	336	0.00017732	0.010698
Placenta	BP	skeletal system morphogenesis	208	148	0.000177447	0.010698
Placenta	BP	heart process	264	173	0.000178441	0.010729
Placenta	BP	cellular response to oxygen-containing compound	1074	605	0.000178923	0.0107292
Placenta	BP	regulation of cell projection organization	591	368	0.000186479	0.0111313
Placenta	MF	inorganic cation transmembrane transporter activity	540	314	0.000186626	0.0111313
Placenta	BP	positive regulation of ERK1 and ERK2 cascade	184	117	0.000187618	0.0111482
Placenta	BP	cell differentiation involved in kidney development	53	45	0.000187906	0.0111482
Placenta	BP	regulation of protein kinase activity	731	427	0.000195816	0.0115868
Placenta	CC	dendritic spine	168	119	0.000197851	0.0116763
Placenta	BP	regulation of blood circulation	265	172	0.00020057	0.0118056
Placenta	BP	neurotransmitter secretion	143	99	0.000205948	0.0120588
Placenta	BP	signal release from synapse	143	99	0.000205948	0.0120588
Placenta	CC	actomyosin	72	57	0.00021194	0.0123689
Placenta	BP	cellular response to cAMP	51	40	0.000212351	0.0123689
Placenta	BP	regulation of cell development	458	293	0.000214136	0.0124405
Placenta	BP	adherens junction organization	65	52	0.000219204	0.012673
Placenta	BP	positive regulation of protein modification process	967	549	0.000219272	0.012673
Placenta	BP	muscle organ development	298	196	0.000220554	0.0127143
Placenta	BP	biological regulation	11089	5455	0.00022314	0.0128014
Placenta	BP	gliogenesis	268	178	0.000223675	0.0128014
Placenta	BP	cardiac muscle tissue development	189	131	0.000224212	0.0128014
Placenta	BP	adenylate cyclase-modulating G protein-coupled receptor signaling pathway	211	132	0.000224355	0.0128014
Placenta	BP	ameboidal-type cell migration	421	265	0.000238961	0.0136001
Placenta	BP	neuron migration	136	100	0.000247736	0.0140195
Placenta	MF	potassium ion transmembrane transporter activity	146	101	0.000248457	0.0140195
Placenta	BP	pituitary gland development	39	34	0.000248672	0.0140195
Placenta	BP	cellular response to organonitrogen compound	591	351	0.000248837	0.0140195
Placenta	BP	leukocyte migration	410	226	0.000255309	0.014348
Placenta	BP	chemical synaptic transmission, postsynaptic	98	70	0.000259083	0.0145236
Placenta	BP	T cell activation	426	243	0.000259883	0.014532
Placenta	BP	cell-matrix adhesion	216	143	0.000261005	0.0145584
Placenta	BP	pattern specification process	404	266	0.00026385	0.0146804
Placenta	BP	glutamate secretion	39	32	0.000269962	0.0149832
Placenta	BP	hematopoietic or lymphoid organ development	859	489	0.000271066	0.0150073
Placenta	CC	neuron spine	169	119	0.000277241	0.0153113
Placenta	BP	regulation of actin cytoskeleton organization	328	204	0.000280004	0.0154168
Placenta	BP	regulation of synaptic transmission, glutamatergic	65	51	0.000281003	0.0154168
Placenta	CC	potassium channel complex	96	71	0.000281221	0.0154168
Placenta	BP	cellular response to lipid	514	300	0.000283307	0.0154932
Placenta	BP	cellular response to nitrogen compound	638	375	0.000286388	0.015577
Placenta	BP	cellular response to transforming growth factor beta stimulus	237	156	0.000286458	0.015577
Placenta	BP	cell-substrate junction assembly	98	74	0.000286929	0.015577
Placenta	BP	positive regulation of chemotaxis	128	84	0.000289179	0.0156612
Placenta	BP	regulation of endothelial cell migration	190	125	0.000291825	0.0157663
Placenta	BP	response to transforming growth factor beta	242	159	0.000300987	0.0162221
Placenta	BP	hormone secretion	283	177	0.00030289	0.0162854
Placenta	BP	retina morphogenesis in camera-type eye	56	44	0.000304933	0.0163211
Placenta	BP	regulation of transferase activity	934	534	0.000305013	0.0163211
Placenta	BP	regulation of ion transmembrane transporter activity	236	153	0.000314014	0.0167627
Placenta	BP	regulation of hormone levels	466	270	0.000315573	0.0168023
Placenta	BP	hormone transport	291	181	0.00031626	0.0168023
Placenta	BP	muscle contraction	329	203	0.000317263	0.0168157
Placenta	BP	lymphocyte activation	613	340	0.000327571	0.017321
Placenta	BP	adenylate cyclase-inhibiting G protein-coupled receptor signaling pathway	81	58	0.000332049	0.0175164
Placenta	BP	morphogenesis of an epithelium	511	325	0.000333179	0.0175346
Placenta	BP	cardiac muscle contraction	123	86	0.00033832	0.0177634
Placenta	BP	osteoblast differentiation	209	141	0.000353564	0.0185203
Placenta	MF	kinase activity	676	403	0.000362053	0.0188993
Placenta	BP	hemopoiesis	819	464	0.000362789	0.0188993
Placenta	CC	intrinsic component of synaptic membrane	134	97	0.000363334	0.0188993
Placenta	MF	protein kinase activity	526	324	0.000364613	0.0189099
Placenta	CC	lamellipodium	186	126	0.00036523	0.0189099
Placenta	BP	nephron tubule development	83	66	0.000372496	0.0192416
Placenta	BP	glutamate receptor signaling pathway	48	40	0.00037854	0.0195088
Placenta	CC	axon	580	360	0.000386984	0.0198699
Placenta	MF	glutamate receptor activity	26	24	0.000387324	0.0198699
Placenta	BP	positive regulation of cellular metabolic process	2971	1618	0.000392033	0.0200654
Placenta	BP	positive regulation of cell-substrate adhesion	118	82	0.00041027	0.0209509
Placenta	BP	cell fate determination	41	36	0.000412325	0.0210079
Placenta	CC	myosin complex	57	43	0.000414132	0.021052
Placenta	BP	leukocyte differentiation	473	277	0.000418834	0.0212428
Placenta	BP	striated muscle contraction	162	107	0.000426711	0.0215933
Placenta	CC	ruffle	168	113	0.000433665	0.0218957
Placenta	MF	actinin binding	34	29	0.000443076	0.0223205
Placenta	BP	epithelial cell migration	312	196	0.000472614	0.0237549
Placenta	MF	sodium ion transmembrane transporter activity	140	91	0.000474586	0.0238006
Placenta	BP	multicellular organismal homeostasis	486	288	0.000486201	0.0243285
Placenta	BP	import across plasma membrane	148	99	0.000492975	0.0245629
Placenta	BP	calcium ion transport	375	222	0.00049308	0.0245629
Placenta	BP	localization	6094	3092	0.000498056	0.0247088
Placenta	BP	regulation of peptide hormone secretion	196	126	0.000498219	0.0247088
Placenta	CC	dendrite	573	354	0.000499478	0.0247164
Placenta	BP	mononuclear cell differentiation	371	219	0.000515642	0.0254401
Placenta	BP	positive regulation of protein tyrosine kinase activity	55	42	0.000516727	0.0254401
Placenta	MF	calcium channel activity	113	78	0.000517514	0.0254401
Placenta	BP	regulation of protein modification process	1488	821	0.000523025	0.0256546
Placenta	MF	protein tyrosine kinase binding	95	67	0.00052613	0.0257504
Placenta	BP	regulation of synapse assembly	82	63	0.000533024	0.0260309
Placenta	MF	molecular function regulator	2061	1089	0.000549944	0.0267987
Placenta	BP	endocytosis	532	306	0.000561368	0.0272959
Placenta	BP	biomineral tissue development	143	96	0.000568422	0.0275789
Placenta	BP	renal tubule development	85	67	0.000578282	0.0279699
Placenta	BP	regulation of transporter activity	257	164	0.000578981	0.0279699
Placenta	BP	cell-substrate junction organization	104	77	0.000580349	0.0279756
Placenta	BP	positive regulation of secretion	278	167	0.000592544	0.028502
Placenta	BP	positive regulation of protein kinase activity	494	294	0.000598278	0.0287161
Placenta	BP	regulation of developmental growth	288	191	0.000603907	0.0289242
Placenta	BP	regulation of GTPase activity	434	268	0.000608037	0.0290598
Placenta	BP	immune system development	912	511	0.00061447	0.029297
Placenta	BP	excitatory postsynaptic potential	93	66	0.000615621	0.029297
Placenta	BP	cell chemotaxis	263	152	0.000620583	0.0294705
Placenta	BP	ear development	199	135	0.000628588	0.0297873
Placenta	BP	mesonephric epithelium development	83	65	0.000636297	0.0300254
Placenta	BP	mesonephric tubule development	83	65	0.000636297	0.0300254
Placenta	BP	epithelium migration	315	197	0.000639804	0.0301274
Placenta	CC	dendritic tree	575	354	0.000654538	0.030719
Placenta	BP	regulation of cellular component organization	2165	1202	0.000655115	0.030719
Placenta	BP	ion transmembrane transport	1247	674	0.000657103	0.0307478
Placenta	BP	regulation of angiogenesis	284	173	0.000659649	0.0308024
Placenta	BP	response to retinoic acid	100	70	0.000664039	0.0309428
Placenta	BP	homeostatic process	1737	921	0.000668871	0.0311032
Placenta	BP	central nervous system neuron differentiation	170	121	0.000678392	0.0314805
Placenta	BP	positive regulation of cell-cell adhesion	254	152	0.00069502	0.0321853
Placenta	BP	chemical homeostasis	1074	581	0.000699375	0.0323201
Placenta	BP	negative regulation of neuron differentiation	61	50	0.00070207	0.032352
Placenta	BP	muscle system process	413	250	0.000702958	0.032352
Placenta	BP	modulation of excitatory postsynaptic potential	41	34	0.000717581	0.0329572
Placenta	BP	learning	125	87	0.000719309	0.0329688
Placenta	BP	regulation of neurotransmitter receptor activity	74	57	0.000721085	0.0329826
Placenta	BP	regulation of cell adhesion mediated by integrin	47	35	0.000729625	0.0333051
Placenta	BP	regulation of response to external stimulus	913	484	0.000734216	0.0334464
Placenta	BP	regulation of MAP kinase activity	287	179	0.000738138	0.0335568
Placenta	BP	cellular response to organic cyclic compound	516	306	0.000749333	0.0339966
Placenta	BP	peptide hormone secretion	233	147	0.000756078	0.0341659
Placenta	BP	phosphorylation	1879	1015	0.000756119	0.0341659
Placenta	BP	negative regulation of locomotion	319	196	0.000766329	0.0345566
Placenta	BP	positive regulation of excitatory postsynaptic potential	25	23	0.000768951	0.0345566
Placenta	BP	regulation of calcium ion import	38	29	0.000769401	0.0345566
Placenta	CC	axon initial segment	15	15	0.000774513	0.0347131
Placenta	CC	integral component of synaptic membrane	123	89	0.000775989	0.0347131
Placenta	BP	positive regulation of response to external stimulus	451	242	0.000780157	0.034792
Placenta	BP	heart contraction	255	164	0.000780864	0.034792
Placenta	BP	regulation of leukocyte migration	184	106	0.000795785	0.0353863
Placenta	BP	ureteric bud development	82	64	0.00080337	0.0355889
Placenta	BP	sodium ion transport	225	140	0.000803523	0.0355889
Placenta	BP	regulation of transmembrane receptor protein serine/threonine kinase signaling pathway	234	151	0.000810457	0.0357585
Placenta	BP	calcium ion import	77	55	0.00081055	0.0357585
Placenta	BP	myeloid leukocyte migration	193	108	0.000841943	0.0370704
Placenta	BP	detection of external stimulus	129	81	0.000858719	0.037734
Placenta	BP	granulocyte migration	130	73	0.000860391	0.037734
Placenta	BP	regulation of morphogenesis of an epithelium	58	46	0.000866825	0.0379418
Placenta	BP	synaptic transmission, GABAergic	44	34	0.000869449	0.0379824
Placenta	MF	alpha-actinin binding	26	23	0.000890657	0.038833
Placenta	BP	rhythmic process	282	177	0.0008971	0.0390378
Placenta	BP	cellular calcium ion homeostasis	398	229	0.000903274	0.0392302
Placenta	BP	mesonephros development	87	67	0.000906899	0.0393113
Placenta	MF	integrin binding	136	91	0.000910774	0.0394028
Placenta	CC	extrinsic component of plasma membrane	158	107	0.000928924	0.0401105
Placenta	BP	regulation of epithelial cell migration	250	159	0.000944422	0.0407011
Placenta	BP	biomineralization	145	96	0.000947128	0.0407393
Placenta	BP	calcium ion transmembrane transport	278	170	0.000956527	0.0410646
Placenta	BP	Rho protein signal transduction	117	80	0.000971486	0.0416183
Placenta	BP	exocytosis	812	426	0.000973146	0.0416183
Placenta	BP	nephron development	131	95	0.000982274	0.0419285
Placenta	BP	cell fate specification	85	66	0.000985485	0.0419854
Placenta	BP	metanephros development	78	61	0.000989027	0.0420562
Placenta	BP	renal filtration	20	18	0.00102289	0.0434137
Placenta	BP	calcium ion homeostasis	410	235	0.00104206	0.0441437
Placenta	MF	extracellular matrix binding	52	40	0.00104555	0.0441957
Placenta	BP	response to food	34	25	0.00104912	0.0441957
Placenta	BP	regulation of vasculature development	288	174	0.00104922	0.0441957
Placenta	MF	inorganic molecular entity transmembrane transporter activity	769	421	0.00105389	0.0443091
Placenta	BP	regulation of calcium ion transport	216	132	0.00106096	0.0445224
Placenta	BP	regulation of substrate adhesion-dependent cell spreading	56	41	0.00106304	0.0445264
Placenta	BP	heart valve development	60	49	0.00108526	0.0453718
Placenta	BP	regionalization	310	208	0.00111103	0.0463628
Placenta	BP	positive regulation of transferase activity	638	370	0.00111772	0.0465552
Placenta	BP	regulation of heart rate	90	64	0.00113479	0.0471169
Placenta	BP	actomyosin structure organization	183	122	0.00113698	0.0471169
Placenta	BP	positive regulation of GTPase activity	365	226	0.0011385	0.0471169
Placenta	BP	anatomical structure arrangement	14	14	0.0011397	0.0471169
Placenta	BP	telencephalon development	219	147	0.00114174	0.0471169
Placenta	CC	stress fiber	63	49	0.00114902	0.0471567
Placenta	CC	contractile actin filament bundle	63	49	0.00114902	0.0471567
Placenta	BP	growth	836	491	0.00114903	0.0471567
Placenta	BP	sympathetic nervous system development	21	20	0.00115166	0.0471781
Placenta	CC	neuron to neuron synapse	323	212	0.00115854	0.0473731
Placenta	MF	GTPase regulator activity	420	259	0.00118453	0.0483474
Placenta	BP	actin filament bundle organization	150	103	0.00120417	0.0490593
Placenta	KEGG	Focal adhesion	193	149	1.8104e-09	6.3726e-07
Placenta	KEGG	Phospholipase D signaling pathway	141	107	1.06557e-06	0.00018754
Placenta	KEGG	Calcium signaling pathway	224	157	2.02802e-06	0.000237955
Placenta	KEGG	ECM-receptor interaction	84	66	4.06174e-06	0.000357433
Placenta	KEGG	Pathways in cancer	495	314	7.56857e-06	0.000532827
Placenta	KEGG	Neuroactive ligand-receptor interaction	329	185	1.60262e-05	0.000940204
Placenta	KEGG	cAMP signaling pathway	217	147	3.43304e-05	0.00172633
Placenta	KEGG	Arrhythmogenic right ventricular cardiomyopathy	75	59	0.000121719	0.00535565
Placenta	KEGG	Platelet activation	121	86	0.000165117	0.00645792
Placenta	KEGG	PI3K-Akt signaling pathway	327	208	0.000184014	0.00647728
Placenta	KEGG	Rap1 signaling pathway	203	141	0.000205239	0.00656766
Placenta	KEGG	MAPK signaling pathway	279	185	0.000254932	0.00747801
Placenta	KEGG	Proteoglycans in cancer	199	137	0.000303443	0.00812703
Placenta	KEGG	Glutamatergic synapse	111	82	0.000323234	0.00812703
Placenta	KEGG	Axon guidance	176	126	0.000434721	0.0102015
Placenta	KEGG	Ras signaling pathway	225	147	0.00047624	0.0104773
Placenta	KEGG	Dilated cardiomyopathy	93	68	0.000546781	0.0110001
Placenta	KEGG	Human papillomavirus infection	310	197	0.000562508	0.0110001
Placenta	KEGG	Regulation of actin cytoskeleton	216	140	0.000660159	0.0122303
Placenta	KEGG	Growth hormone synthesis, secretion and action	118	82	0.00145636	0.025632
Placenta	KEGG	Neurotrophin signaling pathway	113	78	0.00164123	0.0265662
Placenta	KEGG	Insulin secretion	82	60	0.00166039	0.0265662
Placenta	KEGG	Fc gamma R-mediated phagocytosis	92	64	0.00230698	0.0353068
Placenta	KEGG	Bacterial invasion of epithelial cells	76	54	0.00254454	0.0363214
Placenta	KEGG	Cushing syndrome	150	103	0.00257964	0.0363214
Placenta	KEGG	Gastric cancer	146	100	0.00294342	0.038433
Placenta	KEGG	Renal cell carcinoma	64	47	0.00294799	0.038433
Placenta	KEGG	Endocrine resistance	93	67	0.0032396	0.0399825
Placenta	KEGG	Cholinergic synapse	110	77	0.00329401	0.0399825
Placenta	KEGG	Choline metabolism in cancer	93	65	0.00380268	0.0446181
Placenta	KEGG	Cell adhesion molecules	137	87	0.00394362	0.0447792
Placenta	KEGG	Hypertrophic cardiomyopathy	88	61	0.00437426	0.0481169
Cerebellum	KEGG	Nucleocytoplasmic transport	100	47	9.66186e-05	0.0341064
Cerebellum	BP	nucleic acid metabolic process	4712	1642	1.30774e-13	2.92501e-09
Cerebellum	CC	nucleus	6868	2309	6.80187e-13	5.28173e-09
Cerebellum	CC	nuclear lumen	4132	1469	7.08419e-13	5.28173e-09
Cerebellum	BP	regulation of nucleobase-containing compound metabolic process	3602	1338	3.57201e-12	1.99738e-08
Cerebellum	BP	RNA metabolic process	4249	1496	6.38253e-12	2.85516e-08
Cerebellum	BP	regulation of primary metabolic process	5329	1880	8.56593e-12	3.19324e-08
Cerebellum	BP	regulation of cellular metabolic process	5528	1946	1.0361e-11	3.31064e-08
Cerebellum	BP	regulation of nitrogen compound metabolic process	5144	1822	1.27233e-11	3.55728e-08
Cerebellum	CC	nucleoplasm	3763	1358	1.43165e-11	3.55797e-08
Cerebellum	BP	nucleobase-containing compound metabolic process	5180	1759	1.73769e-11	3.88669e-08
Cerebellum	CC	intracellular organelle lumen	5000	1697	2.94017e-11	5.97844e-08
Cerebellum	BP	heterocycle metabolic process	5323	1789	6.66154e-11	1.24166e-07
Cerebellum	BP	regulation of RNA metabolic process	3359	1252	8.10034e-11	1.30103e-07
Cerebellum	BP	regulation of metabolic process	6353	2155	8.14341e-11	1.30103e-07
Cerebellum	BP	cellular nitrogen compound metabolic process	5867	1940	9.23599e-11	1.37721e-07
Cerebellum	BP	cellular aromatic compound metabolic process	5366	1796	2.00614e-10	2.67088e-07
Cerebellum	CC	membrane-enclosed lumen	5143	1726	2.14941e-10	2.67088e-07
Cerebellum	CC	organelle lumen	5143	1726	2.14941e-10	2.67088e-07
Cerebellum	BP	regulation of macromolecule metabolic process	5858	1994	3.70755e-10	4.36457e-07
Cerebellum	BP	organic cyclic compound metabolic process	5573	1850	4.05441e-10	4.53425e-07
Cerebellum	BP	cellular macromolecule metabolic process	7388	2453	4.73727e-10	5.04564e-07
Cerebellum	BP	metabolic process	10567	3285	5.6586e-10	5.753e-07
Cerebellum	BP	cellular metabolic process	9686	3059	9.69144e-10	9.01704e-07
Cerebellum	BP	primary metabolic process	9419	2983	9.96059e-10	9.01704e-07
Cerebellum	MF	nucleic acid binding	3681	1257	1.00785e-09	9.01704e-07
Cerebellum	CC	intracellular membrane-bounded organelle	10185	3222	1.18323e-09	1.01466e-06
Cerebellum	BP	regulation of macromolecule biosynthetic process	3576	1298	1.22484e-09	1.01466e-06
Cerebellum	BP	macromolecule biosynthetic process	4489	1559	1.2751e-09	1.01858e-06
Cerebellum	BP	macromolecule metabolic process	8773	2799	1.59306e-09	1.22869e-06
Cerebellum	BP	regulation of gene expression	4576	1580	2.48622e-09	1.85167e-06
Cerebellum	BP	positive regulation of nitrogen compound metabolic process	2793	1069	2.56636e-09	1.85167e-06
Cerebellum	BP	regulation of cellular macromolecule biosynthetic process	3550	1285	3.42768e-09	2.39584e-06
Cerebellum	BP	regulation of cellular biosynthetic process	3717	1336	3.63891e-09	2.46641e-06
Cerebellum	BP	regulation of biosynthetic process	3794	1360	4.70098e-09	3.09255e-06
Cerebellum	BP	nitrogen compound metabolic process	8982	2852	4.96332e-09	3.17185e-06
Cerebellum	BP	cellular macromolecule biosynthetic process	4434	1531	7.18098e-09	4.27479e-06
Cerebellum	MF	binding	14417	4414	7.212e-09	4.27479e-06
Cerebellum	BP	positive regulation of cellular metabolic process	2971	1124	7.26258e-09	4.27479e-06
Cerebellum	BP	gene expression	5544	1824	8.46653e-09	4.85566e-06
Cerebellum	BP	positive regulation of nucleobase-containing compound metabolic process	1738	707	1.00635e-08	5.62724e-06
Cerebellum	CC	membrane-bounded organelle	11524	3589	1.08427e-08	5.79559e-06
Cerebellum	CC	intracellular anatomical structure	13249	4104	1.08828e-08	5.79559e-06
Cerebellum	BP	RNA biosynthetic process	3281	1195	1.26371e-08	6.57337e-06
Cerebellum	BP	cellular nitrogen compound biosynthetic process	4384	1511	1.45489e-08	7.27856e-06
Cerebellum	BP	organic substance metabolic process	10129	3146	1.46437e-08	7.27856e-06
Cerebellum	BP	regulation of RNA biosynthetic process	3110	1143	1.50231e-08	7.30484e-06
Cerebellum	BP	regulation of transcription, DNA-templated	3107	1141	1.83796e-08	8.74676e-06
Cerebellum	BP	regulation of nucleic acid-templated transcription	3108	1141	1.98604e-08	9.25454e-06
Cerebellum	CC	chromosome	1617	640	2.03269e-08	9.27861e-06
Cerebellum	BP	positive regulation of RNA metabolic process	1580	654	2.26636e-08	1.01383e-05
Cerebellum	BP	nucleic acid-templated transcription	3270	1189	2.34217e-08	1.0272e-05
Cerebellum	CC	intracellular organelle	11213	3520	2.44631e-08	1.05224e-05
Cerebellum	BP	transcription, DNA-templated	3268	1188	2.62171e-08	1.10641e-05
Cerebellum	CC	organelle	12503	3880	2.84096e-08	1.17674e-05
Cerebellum	MF	heterocyclic compound binding	5451	1813	3.1464e-08	1.27955e-05
Cerebellum	BP	establishment of RNA localization	184	89	3.32521e-08	1.32813e-05
Cerebellum	BP	nucleic acid transport	181	88	3.52571e-08	1.35965e-05
Cerebellum	BP	RNA transport	181	88	3.52571e-08	1.35965e-05
Cerebellum	MF	organic cyclic compound binding	5523	1832	5.65355e-08	2.14327e-05
Cerebellum	MF	transcription regulator activity	1741	682	5.93607e-08	2.21287e-05
Cerebellum	BP	positive regulation of biosynthetic process	1814	722	6.35994e-08	2.33201e-05
Cerebellum	BP	positive regulation of macromolecule metabolic process	3143	1162	7.97867e-08	2.87837e-05
Cerebellum	BP	positive regulation of macromolecule biosynthetic process	1693	682	1.01763e-07	3.54627e-05
Cerebellum	BP	positive regulation of RNA biosynthetic process	1490	618	1.02592e-07	3.54627e-05
Cerebellum	BP	positive regulation of cellular biosynthetic process	1785	710	1.03057e-07	3.54627e-05
Cerebellum	BP	positive regulation of metabolic process	3406	1246	1.14331e-07	3.87462e-05
Cerebellum	BP	negative regulation of RNA metabolic process	1274	525	1.17524e-07	3.92337e-05
Cerebellum	BP	positive regulation of transcription, DNA-templated	1489	617	1.26039e-07	4.08568e-05
Cerebellum	BP	positive regulation of nucleic acid-templated transcription	1489	617	1.26039e-07	4.08568e-05
Cerebellum	BP	negative regulation of metabolic process	3075	1075	1.47785e-07	4.72217e-05
Cerebellum	CC	chromatin	1100	473	1.97357e-07	6.16092e-05
Cerebellum	BP	regulation of transcription by RNA polymerase II	2319	881	1.98322e-07	6.16092e-05
Cerebellum	BP	nucleobase-containing compound transport	230	102	2.9013e-07	8.88951e-05
Cerebellum	BP	RNA localization	216	96	3.93453e-07	0.000118808
Cerebellum	BP	transcription by RNA polymerase II	2458	923	3.98383e-07	0.000118808
Cerebellum	BP	negative regulation of cellular metabolic process	2352	873	4.29229e-07	0.000126323
Cerebellum	BP	nucleobase-containing compound biosynthetic process	3703	1306	7.04349e-07	0.0002046
Cerebellum	BP	RNA export from nucleus	131	62	7.55392e-07	0.000216613
Cerebellum	BP	positive regulation of cellular process	5075	1800	8.42658e-07	0.000238579
Cerebellum	BP	negative regulation of transcription by RNA polymerase II	810	356	8.77307e-07	0.000245284
Cerebellum	BP	ribonucleoprotein complex export from nucleus	121	58	9.73941e-07	0.00026894
Cerebellum	BP	negative regulation of nitrogen compound metabolic process	2177	813	1.13445e-06	0.000308027
Cerebellum	MF	protein binding	12417	3873	1.14303e-06	0.000308027
Cerebellum	BP	negative regulation of nucleobase-containing compound metabolic process	1366	550	1.15873e-06	0.00030854
Cerebellum	BP	ribonucleoprotein complex localization	122	58	1.34898e-06	0.000354972
Cerebellum	MF	DNA binding	2240	811	1.71554e-06	0.000446179
Cerebellum	BP	heterocycle biosynthetic process	3763	1317	2.66678e-06	0.000685608
Cerebellum	BP	positive regulation of transcription by RNA polymerase II	1110	474	3.73214e-06	0.000933096
Cerebellum	BP	negative regulation of RNA biosynthetic process	1179	483	3.75458e-06	0.000933096
Cerebellum	BP	negative regulation of nucleic acid-templated transcription	1179	483	3.75458e-06	0.000933096
Cerebellum	BP	negative regulation of transcription, DNA-templated	1177	482	4.15185e-06	0.00102049
Cerebellum	BP	regulation of alternative mRNA splicing, via spliceosome	53	36	4.53478e-06	0.00109685
Cerebellum	BP	organic substance biosynthetic process	5508	1816	4.5606e-06	0.00109685
Cerebellum	MF	molecular_function	15839	4724	5.14767e-06	0.00121817
Cerebellum	BP	aromatic compound biosynthetic process	3772	1317	5.17397e-06	0.00121817
Cerebellum	CC	nuclear body	756	303	5.93191e-06	0.00138207
Cerebellum	BP	negative regulation of macromolecule biosynthetic process	1407	555	6.04625e-06	0.00139419
Cerebellum	BP	negative regulation of macromolecule metabolic process	2864	992	6.23921e-06	0.001424
Cerebellum	BP	mRNA export from nucleus	104	50	6.94805e-06	0.00155407
Cerebellum	BP	mRNA-containing ribonucleoprotein complex export from nucleus	104	50	6.94805e-06	0.00155407
Cerebellum	BP	biosynthetic process	5582	1837	7.23239e-06	0.00160165
Cerebellum	BP	mRNA transport	136	64	7.80854e-06	0.00169797
Cerebellum	BP	negative regulation of biosynthetic process	1484	580	7.84597e-06	0.00169797
Cerebellum	BP	negative regulation of cellular macromolecule biosynthetic process	1397	551	7.89507e-06	0.00169797
Cerebellum	CC	nuclear protein-containing complex	1102	400	8.73592e-06	0.00186092
Cerebellum	BP	organic cyclic compound biosynthetic process	3912	1353	9.13046e-06	0.00192661
Cerebellum	BP	protein export from nucleus	172	75	9.89796e-06	0.00206904
Cerebellum	MF	RNA polymerase II cis-regulatory region sequence-specific DNA binding	1102	441	1.18809e-05	0.00246022
Cerebellum	BP	negative regulation of cellular biosynthetic process	1458	570	1.19893e-05	0.00246022
Cerebellum	BP	nuclear export	188	81	1.42285e-05	0.00289318
Cerebellum	BP	regulation of mRNA splicing, via spliceosome	93	52	1.46667e-05	0.00295541
Cerebellum	CC	nuclear speck	379	165	1.48804e-05	0.00297169
Cerebellum	BP	negative regulation of cellular process	4512	1585	1.61768e-05	0.00320199
Cerebellum	BP	regulation of RNA splicing	132	68	1.88262e-05	0.00369374
Cerebellum	BP	nucleocytoplasmic transport	316	128	2.1801e-05	0.00424019
Cerebellum	MF	transcription coregulator activity	434	193	2.31509e-05	0.00446392
Cerebellum	MF	RNA binding	1618	525	2.52462e-05	0.00482633
Cerebellum	CC	intracellular non-membrane-bounded organelle	4631	1567	2.63055e-05	0.00498623
Cerebellum	BP	cellular biosynthetic process	5422	1778	2.98674e-05	0.00561381
Cerebellum	BP	positive regulation of biological process	5581	1921	3.23621e-05	0.00603202
Cerebellum	BP	regulation of cell differentiation	1483	590	3.41196e-05	0.00630704
Cerebellum	MF	transcription corepressor activity	163	83	3.58929e-05	0.00658046
Cerebellum	CC	non-membrane-bounded organelle	4638	1567	3.72056e-05	0.00676568
Cerebellum	BP	nuclear transport	319	128	3.824e-05	0.0068977
Cerebellum	MF	cis-regulatory region sequence-specific DNA binding	1121	445	4.15241e-05	0.00743016
Cerebellum	BP	alternative mRNA splicing, via spliceosome	66	40	4.46138e-05	0.00791967
Cerebellum	CC	transcription regulator complex	384	181	5.44735e-05	0.00959377
Cerebellum	MF	sequence-specific DNA binding	1533	580	6.29291e-05	0.0109964
Cerebellum	BP	negative regulation of biological process	5120	1738	6.79046e-05	0.0117738
Cerebellum	BP	glial cell migration	46	30	6.9948e-05	0.0120348
Cerebellum	BP	biological regulation	11089	3489	7.08664e-05	0.0120998
Cerebellum	BP	regulation of cellular process	9818	3159	7.29419e-05	0.0122766
Cerebellum	MF	double-stranded DNA binding	1529	572	7.29998e-05	0.0122766
Cerebellum	BP	regulation of mRNA processing	130	65	7.98255e-05	0.0133243
Cerebellum	MF	structural molecule activity conferring elasticity	11	11	8.54527e-05	0.0141579
Cerebellum	MF	transcription factor binding	595	262	8.62253e-05	0.0141809
Cerebellum	CC	cellular_component	16185	4789	0.000108919	0.0177823
Cerebellum	MF	RNA polymerase II transcription regulatory region sequence-specific DNA binding	1297	493	0.000144279	0.0233846
Cerebellum	MF	histone deacetylase binding	103	56	0.000153683	0.0247298
Cerebellum	MF	DNA-binding transcription factor activity, RNA polymerase II-specific	1260	480	0.000158635	0.0253442
Cerebellum	BP	RNA splicing, via transesterification reactions	324	126	0.000175283	0.0278053
Cerebellum	CC	cellular anatomical entity	16047	4753	0.000186661	0.0294017
Cerebellum	BP	RNA splicing, via transesterification reactions with bulged adenosine as nucleophile	321	125	0.000196602	0.0305375
Cerebellum	BP	mRNA splicing, via spliceosome	321	125	0.000196602	0.0305375
Cerebellum	MF	transcription regulatory region sequence-specific DNA binding	1386	523	0.000255772	0.0393305
Cerebellum	BP	negative regulation of cell projection organization	166	84	0.000256729	0.0393305
Cerebellum	MF	DNA-binding transcription factor activity	1305	492	0.00025864	0.0393538
Cerebellum	BP	cell morphogenesis involved in neuron differentiation	547	256	0.000265394	0.0401086
Cerebellum	BP	gliogenesis	268	128	0.000270396	0.0405902
Cerebellum	BP	cellular process	14969	4481	0.000273551	0.0407901
Cerebellum	BP	regulation of nervous system development	391	185	0.000281399	0.0416824
Cerebellum	MF	regulatory region nucleic acid binding	1387	523	0.000283527	0.0417213
Cerebellum	CC	SWI/SNF superfamily-type complex	69	39	0.000293658	0.0429297
Cerebellum	BP	protein-containing complex localization	267	109	0.000310721	0.0451292
Cerebellum	BP	mRNA metabolic process	787	274	0.000329687	0.0475749
Cerebellum	BP	covalent chromatin modification	422	177	0.000341801	0.0490068
PFC	CC	intracellular organelle	11213	2341	3.52314e-08	0.000317705
PFC	CC	catalytic complex	1285	329	3.78018e-08	0.000317705
PFC	CC	intracellular membrane-bounded organelle	10185	2134	4.26126e-08	0.000317705
PFC	CC	intracellular anatomical structure	13249	2712	9.08538e-08	0.000462382
PFC	BP	cellular macromolecule metabolic process	7388	1627	1.03363e-07	0.000462382
PFC	CC	organelle	12503	2564	7.30819e-07	0.00272437
PFC	BP	Wnt signaling pathway	485	166	1.92731e-06	0.00542328
PFC	BP	cellular metabolic process	9686	2013	1.93974e-06	0.00542328
PFC	BP	cell-cell signaling by wnt	487	166	3.47477e-06	0.00828937
PFC	CC	membrane-bounded organelle	11524	2365	3.7472e-06	0.00828937
PFC	BP	mitotic cell cycle	957	257	4.07668e-06	0.00828937
PFC	BP	mitotic cell cycle process	816	219	1.68751e-05	0.0288588
PFC	BP	morphogenesis of an epithelium	511	172	1.77077e-05	0.0288588
PFC	BP	cell surface receptor signaling pathway involved in cell-cell signaling	579	188	1.80634e-05	0.0288588
PFC	BP	regulation of mitotic cell cycle	556	160	2.39724e-05	0.0357461
PFC	BP	macromolecule metabolic process	8773	1832	2.77195e-05	0.0387501
Right Ventricle	BP	embryo development	943	348	9.59528e-09	0.000203967
Right Ventricle	BP	chordate embryonic development	546	214	1.82382e-08	0.000203967
Right Ventricle	BP	embryo development ending in birth or egg hatching	561	217	3.85212e-08	0.000287201
Right Ventricle	CC	intracellular organelle	11213	2597	2.30171e-06	0.0110008
Right Ventricle	CC	intracellular anatomical structure	13249	3019	2.45916e-06	0.0110008
Right Ventricle	BP	primary metabolic process	9419	2186	5.3257e-06	0.0198533
Right Ventricle	BP	cellular macromolecule metabolic process	7388	1803	6.47084e-06	0.0206762
Right Ventricle	BP	nitrogen compound metabolic process	8982	2094	1.0118e-05	0.0282886
Right Ventricle	BP	multicellular organism development	4929	1364	1.38887e-05	0.0332344
Right Ventricle	BP	embryonic organ development	398	161	1.48587e-05	0.0332344
Right Ventricle	BP	embryonic morphogenesis	547	211	1.71699e-05	0.0349127
Right Ventricle	BP	regulation of cellular metabolic process	5528	1420	2.23507e-05	0.0416599
Right Ventricle	BP	tube development	992	334	2.434e-05	0.041878
Right Ventricle	BP	anatomical structure development	5380	1462	3.05521e-05	0.0463135
Right Ventricle	BP	cellular metabolic process	9686	2230	3.10593e-05	0.0463135

## Sheet: Table S4
Summary of SFARI genes which overlap with THC DMC genes (p<0.05).
Gene Name	Placenta nCpGs	Lung nCpGs	PFC nCpGs	Heart nCpGs	Cerebellum nCpGs	number of tissues	Total n CpGs
FOXP1	14	3	2	10	4	5	33
AUTS2	18	2	3	1	4	5	28
CASZ1	16	1	2	2	7	5	28
AGAP1	8	5	1	7	4	5	25
EBF3	18	1	1	1	1	5	22
SHANK2	9	1	3	3	5	5	21
CELF2	14	1	1	2	2	5	20
TRAPPC9	4	3	2	6	5	5	20
ARID1B	11	1	2	1	4	5	19
SYNGAP1	10	1	1	1	6	5	19
HDAC4	10	2	2	1	3	5	18
MEF2C	13	1	2	1	1	5	18
CARD11	10	1	1	1	3	5	16
JARID2	9	2	2	1	2	5	16
KIRREL3	7	3	2	1	3	5	16
NRP2	7	1	1	3	3	5	15
LRFN2	4	1	1	3	5	5	14
ITPR1	5	2	1	3	1	5	12
PRKCB	3	1	1	3	4	5	12
PBX1	3	1	2	2	2	5	10
UBE2H	3	1	2	2	2	5	10
FHIT	3	2	1	1	2	5	9
CNTN4	4	1	1	1	1	5	8
GRIN1	1	1	1	1	4	5	8
ARHGEF10	1	1	1	1	3	5	7
FGF14	3	1	1	1	1	5	7
ICA1	2	1	2	1	1	5	7
PDE1C	1	1	1	2	2	5	7
PRKAR1B	1	1	1	1	2	5	6
NFIA	20	0	2	3	2	4	27
CUX1	15	0	5	1	3	4	24
MEIS2	7	0	2	12	3	4	24
DPP6	16	0	1	1	2	4	20
SOX5	14	0	1	4	1	4	20
SND1	4	3	3	0	9	4	19
KCNMA1	10	1	1	0	6	4	18
PCDHA9	13	2	0	1	2	4	18
IRF2BPL	11	2	0	1	2	4	16
RBFOX1	12	1	1	0	2	4	16
SOX6	9	0	2	2	3	4	16
ANKS1B	11	1	0	2	1	4	15
TCF7L2	7	1	4	0	3	4	15
DNAH17	11	0	1	1	1	4	14
DST	8	0	4	1	1	4	14
MED13L	6	0	2	5	1	4	14
PCDHA1	11	1	1	1	0	4	14
DLGAP1	8	0	1	3	1	4	13
ZBTB20	5	0	1	5	2	4	13
CUX2	9	0	1	1	1	4	12
DOCK4	6	0	2	3	1	4	12
LMX1B	7	0	2	1	2	4	12
NFIX	8	0	1	1	2	4	12
CCDC88C	4	2	3	2	0	4	11
CDH11	6	2	0	2	1	4	11
CDH22	4	1	0	3	3	4	11
DYNC1H1	0	1	2	3	5	4	11
ERG	7	2	1	0	1	4	11
NFIB	6	1	0	3	1	4	11
TRIO	5	2	1	0	3	4	11
ATP2B2	5	1	3	1	0	4	10
CTNND2	6	0	1	1	2	4	10
DNMT3A	4	1	0	1	4	4	10
GRID1	5	1	1	0	3	4	10
HIVEP3	4	1	0	3	2	4	10
MEGF11	4	0	1	2	3	4	10
NKX2-2	7	1	0	1	1	4	10
TET3	5	0	1	2	2	4	10
ASTN2	3	2	2	0	2	4	9
CGNL1	5	0	2	1	1	4	9
DIP2C	4	1	2	0	2	4	9
PARD3B	6	0	1	1	1	4	9
RFX4	6	1	0	1	1	4	9
SMURF1	5	1	1	0	2	4	9
SPTBN1	5	1	1	0	2	4	9
DPYSL2	1	0	1	3	3	4	8
EXT1	3	0	1	3	1	4	8
GPC6	1	0	2	2	3	4	8
KCNB1	4	0	2	1	1	4	8
LRBA	3	0	1	1	3	4	8
MSRA	5	0	1	1	1	4	8
SMG6	5	0	1	1	1	4	8
UPF2	0	5	1	1	1	4	8
USP7	3	0	1	2	2	4	8
YWHAG	3	1	1	3	0	4	8
ZMYND8	4	0	1	1	2	4	8
CREBBP	4	1	1	0	1	4	7
DSCAM	4	1	1	0	1	4	7
EN2	3	1	2	0	1	4	7
INTS1	3	0	1	1	2	4	7
NF1	1	1	1	0	4	4	7
P4HA2	4	1	1	0	1	4	7
PRKCA	4	1	0	1	1	4	7
RAB11FIP5	4	1	1	1	0	4	7
SIN3A	2	2	0	2	1	4	7
CHD9	3	1	1	0	1	4	6
CNTNAP5	2	1	1	2	0	4	6
FAT1	3	1	1	0	1	4	6
FBN1	2	1	1	0	2	4	6
HDLBP	1	2	1	2	0	4	6
HIVEP2	1	0	1	2	2	4	6
KIF13B	2	0	1	1	2	4	6
LEP	2	0	1	1	2	4	6
MYO9B	3	1	0	1	1	4	6
SDC2	3	1	1	0	1	4	6
CACNA1A	2	1	1	0	1	4	5
CAMK2B	2	1	1	0	1	4	5
HNRNPF	1	1	0	1	2	4	5
PRICKLE1	1	0	1	2	1	4	5
SETD1A	1	0	1	1	2	4	5
SMARCA4	1	0	2	1	1	4	5
SRCAP	1	1	0	1	2	4	5
TRPC6	2	1	1	1	0	4	5
UBE3A	2	1	1	0	1	4	5
WWP1	2	1	1	0	1	4	5
ZMYND11	0	1	1	1	2	4	5
CCNK	1	1	1	0	1	4	4
CHD3	1	0	1	1	1	4	4
EPHB2	0	1	1	1	1	4	4
GFAP	1	0	1	1	1	4	4
MBD3	1	1	1	1	0	4	4
MIB1	1	1	1	1	0	4	4
OTX1	1	0	1	1	1	4	4
GNAS	35	0	2	0	1	3	38
TCF4	16	0	0	1	3	3	20
NAV2	13	0	2	0	4	3	19
CELF4	16	0	0	1	1	3	18
CPEB4	8	0	0	5	2	3	15
MYT1L	11	1	0	1	0	3	13
NRXN1	9	2	0	0	2	3	13
CACNA1C	9	1	0	0	2	3	12
CADPS	10	1	0	0	1	3	12
CHD7	8	0	0	1	3	3	12
CMIP	9	0	0	2	1	3	12
NRXN3	7	0	3	0	2	3	12
CACNA1H	9	0	0	1	1	3	11
DLG2	8	1	0	2	0	3	11
MEGF10	9	1	0	1	0	3	11
CACNA2D3	4	0	0	3	3	3	10
MAPT	8	0	1	0	1	3	10
PAX6	6	1	0	0	3	3	10
RORA	7	1	0	0	2	3	10
SATB1	5	1	0	0	4	3	10
SKI	6	0	0	2	2	3	10
UBE3C	5	0	2	0	3	3	10
LRP1	6	0	1	0	2	3	9
MSX2	3	0	0	4	2	3	9
NR4A2	7	1	0	0	1	3	9
NTRK3	7	1	1	0	0	3	9
PCDH10	6	0	0	2	1	3	9
PCDH9	5	0	0	2	2	3	9
TTN	7	0	1	0	1	3	9
WWOX	6	0	2	1	0	3	9
ANKRD11	3	0	0	1	4	3	8
CDH8	6	1	0	1	0	3	8
KIF5C	6	1	0	0	1	3	8
NBEA	4	0	1	0	3	3	8
NR3C2	5	2	0	0	1	3	8
NRXN2	4	0	1	0	3	3	8
SATB2	5	0	2	0	1	3	8
SIK1	4	0	0	3	1	3	8
APBA2	4	0	0	1	2	3	7
BRSK2	5	0	1	0	1	3	7
CAMK4	4	0	1	0	2	3	7
CNTNAP4	5	1	0	1	0	3	7
DOCK1	3	0	1	0	3	3	7
DPYSL3	5	0	0	1	1	3	7
FBRSL1	4	0	1	0	2	3	7
KCNC1	5	0	0	1	1	3	7
MYO1E	4	0	0	1	2	3	7
NCKAP5	3	0	0	3	1	3	7
PLCB1	5	1	0	1	0	3	7
RAI1	3	0	0	2	2	3	7
SLC45A1	5	0	0	1	1	3	7
TRRAP	2	3	2	0	0	3	7
UNC13A	5	0	0	1	1	3	7
VPS13B	4	1	2	0	0	3	7
ZNF827	3	0	0	1	3	3	7
EP400	3	0	2	0	1	3	6
GALNT2	4	1	0	1	0	3	6
LNPK	4	1	0	1	0	3	6
LRRC4C	4	0	1	1	0	3	6
MACROD2	1	0	3	2	0	3	6
NOVA2	3	1	0	2	0	3	6
PAX5	4	1	0	0	1	3	6
SASH1	4	1	1	0	0	3	6
SETDB2	0	0	2	2	2	3	6
ZBTB7A	4	0	1	0	1	3	6
ZNF385B	1	3	0	2	0	3	6
ZNF462	3	0	2	1	0	3	6
AGO2	1	1	0	0	3	3	5
BRD4	3	0	0	1	1	3	5
CACNA2D1	3	1	0	0	1	3	5
CACNB2	2	0	0	2	1	3	5
CEP41	2	0	0	2	1	3	5
CPZ	3	0	1	0	1	3	5
DAPP1	3	0	1	1	0	3	5
DLL1	2	2	0	0	1	3	5
DLX2	2	0	2	0	1	3	5
DLX3	3	0	1	0	1	3	5
DYDC2	2	0	1	0	2	3	5
FOXG1	3	0	1	0	1	3	5
HERC2	3	0	1	1	0	3	5
HTR1B	3	1	1	0	0	3	5
KAT2B	2	1	0	2	0	3	5
KATNAL1	2	0	2	0	1	3	5
MAST3	3	0	1	0	1	3	5
NUAK1	3	1	0	1	0	3	5
PAK1	3	0	1	1	0	3	5
PDK2	2	1	0	0	2	3	5
PRKD1	3	0	1	0	1	3	5
PRKD2	2	0	1	0	2	3	5
PTGS2	3	0	0	1	1	3	5
SCN8A	2	0	0	2	1	3	5
SETBP1	3	0	1	0	1	3	5
SF3B1	0	0	2	1	2	3	5
STK39	2	0	0	1	2	3	5
SYBU	2	0	0	2	1	3	5
THBS1	3	0	1	1	0	3	5
TNRC6B	2	1	2	0	0	3	5
ACHE	1	2	0	1	0	3	4
AGBL4	2	1	1	0	0	3	4
ARID2	1	0	2	1	0	3	4
BRINP3	1	0	0	1	2	3	4
CLASP1	0	0	2	1	1	3	4
CYP27A1	1	1	2	0	0	3	4
DHX30	0	0	2	1	1	3	4
DNER	2	0	1	0	1	3	4
DPP10	2	0	0	1	1	3	4
DYRK1A	1	0	1	0	2	3	4
EXOC5	2	0	0	1	1	3	4
FBXO33	2	0	0	1	1	3	4
FGFR1	2	0	1	1	0	3	4
GPD2	2	1	1	0	0	3	4
GRIN2A	2	0	0	1	1	3	4
GRIP1	1	0	1	0	2	3	4
ITSN1	1	0	0	1	2	3	4
KCND3	2	1	0	0	1	3	4
KCNJ10	2	0	1	1	0	3	4
KRR1	2	0	0	1	1	3	4
LAMA1	0	1	1	0	2	3	4
LRP2	2	0	0	1	1	3	4
MBD5	1	1	0	0	2	3	4
MTOR	0	2	1	1	0	3	4
MYH10	2	0	0	1	1	3	4
MYH9	2	0	0	1	1	3	4
MYLK	2	0	0	1	1	3	4
MYO5A	2	1	1	0	0	3	4
NACC1	1	1	2	0	0	3	4
NEO1	1	2	0	0	1	3	4
NLGN1	1	0	0	2	1	3	4
NXF1	2	0	0	1	1	3	4
PHF21A	2	1	0	1	0	3	4
PIK3R2	1	2	0	1	0	3	4
POGZ	2	0	1	0	1	3	4
PRKN	2	1	0	0	1	3	4
PTBP2	1	0	0	2	1	3	4
RHEB	1	0	2	0	1	3	4
SAMD11	0	1	1	2	0	3	4
SCN2A	2	0	1	1	0	3	4
SHANK1	2	1	0	1	0	3	4
SOS2	1	2	0	0	1	3	4
SYT1	1	0	2	0	1	3	4
TANC2	2	0	1	1	0	3	4
TERF2	0	0	2	1	1	3	4
TRPM1	2	0	1	1	0	3	4
TSPAN17	2	0	1	1	0	3	4
ACTB	1	0	1	0	1	3	3
ARHGAP32	1	0	1	0	1	3	3
ATP6V0A2	1	0	1	1	0	3	3
BICRA	1	0	0	1	1	3	3
BRAF	1	0	1	0	1	3	3
BTAF1	1	0	1	0	1	3	3
CADPS2	1	0	1	0	1	3	3
CCDC91	1	0	0	1	1	3	3
CECR2	0	1	1	0	1	3	3
CHD8	1	1	1	0	0	3	3
CIC	1	1	1	0	0	3	3
CNR1	1	0	0	1	1	3	3
CTTNBP2	1	0	1	1	0	3	3
DISC1	0	0	1	1	1	3	3
DLG1	0	1	0	1	1	3	3
DLGAP3	0	0	1	1	1	3	3
ELAVL3	1	0	1	0	1	3	3
FAN1	1	0	1	1	0	3	3
GRID2	1	0	1	0	1	3	3
GRID2IP	1	0	1	0	1	3	3
HNRNPU	1	0	1	0	1	3	3
KCND2	1	1	0	1	0	3	3
KDM4B	1	0	0	1	1	3	3
KIZ	1	1	0	0	1	3	3
MAPT-AS1	1	0	0	1	1	3	3
MBD1	0	0	1	1	1	3	3
NPAS2	0	1	0	1	1	3	3
OXTR	1	0	0	1	1	3	3
PHF14	1	1	0	1	0	3	3
PNPLA7	1	0	1	0	1	3	3
PREX1	1	0	0	1	1	3	3
PTPRC	1	1	0	0	1	3	3
RAB2A	1	0	1	0	1	3	3
RORB	1	0	1	0	1	3	3
RPS6KA2	1	0	1	1	0	3	3
SCN9A	1	1	0	1	0	3	3
SETD2	0	1	1	0	1	3	3
SLC7A7	1	0	1	1	0	3	3
SRGAP3	1	1	0	1	0	3	3
TAF1C	1	1	0	0	1	3	3
TBC1D5	1	0	0	1	1	3	3
USH2A	1	0	1	0	1	3	3
WDFY4	1	1	0	0	1	3	3
XPO1	1	0	1	1	0	3	3
YY1	1	1	0	0	1	3	3
ZMYM2	1	1	1	0	0	3	3
BCL11A	13	1	0	0	0	2	14
DLGAP2	13	1	0	0	0	2	14
PLXNA4	13	0	1	0	0	2	14
SORCS3	11	0	0	2	0	2	13
PEBP4	9	0	0	0	3	2	12
ANK2	8	0	3	0	0	2	11
ANK3	10	0	1	0	0	2	11
CADM1	10	0	1	0	0	2	11
GRIK4	9	0	0	2	0	2	11
PXDN	10	1	0	0	0	2	11
CTNNA2	8	0	0	2	0	2	10
ELAVL2	9	0	0	1	0	2	10
MCPH1	8	0	2	0	0	2	10
RERE	8	0	0	0	2	2	10
ZMIZ1	8	0	2	0	0	2	10
AGAP2	7	0	0	0	2	2	9
RAPGEF4	8	0	0	1	0	2	9
RELN	7	0	0	2	0	2	9
UNC5D	8	0	0	1	0	2	9
ZBTB16	6	0	0	3	0	2	9
CNTN5	6	0	0	2	0	2	8
GABRB3	7	0	1	0	0	2	8
GRM5	5	0	0	3	0	2	8
HOXA1	7	0	0	1	0	2	8
NTNG2	6	0	0	0	2	2	8
REEP3	7	1	0	0	0	2	8
TBR1	6	0	0	0	2	2	8
ESRRB	6	0	0	0	1	2	7
GRIK2	6	1	0	0	0	2	7
SH3RF3	6	0	0	0	1	2	7
WNT1	6	0	0	1	0	2	7
AHDC1	5	1	0	0	0	2	6
BICDL1	5	0	0	1	0	2	6
CDH10	5	0	1	0	0	2	6
DNAH10	5	0	0	0	1	2	6
FOXP2	5	0	0	0	1	2	6
KANSL1	4	0	0	0	2	2	6
PRICKLE2	4	2	0	0	0	2	6
ROBO2	3	0	0	0	3	2	6
CACNA1E	4	0	0	1	0	2	5
CADM2	3	0	2	0	0	2	5
CCSER1	3	0	2	0	0	2	5
DLG4	3	0	2	0	0	2	5
GRM7	4	0	0	0	1	2	5
KMT2E	1	0	4	0	0	2	5
NLGN2	4	0	1	0	0	2	5
PATJ	2	0	0	0	3	2	5
PSD3	4	0	0	0	1	2	5
SLC1A2	4	0	1	0	0	2	5
TBL1XR1	3	0	0	0	2	2	5
THRA	3	0	0	0	2	2	5
TSHZ3	4	0	0	0	1	2	5
VASH1	4	0	0	0	1	2	5
ADK	3	0	0	0	1	2	4
AHNAK	3	0	0	0	1	2	4
ASAP2	2	0	2	0	0	2	4
CACNA1D	3	0	0	0	1	2	4
CSNK1G1	0	2	2	0	0	2	4
CTCF	0	0	3	1	0	2	4
CYFIP1	0	0	3	1	0	2	4
DDC	2	0	0	0	2	2	4
EIF4G1	3	0	0	0	1	2	4
ETFB	2	0	0	0	2	2	4
GABRA4	3	1	0	0	0	2	4
GAS2	3	0	0	0	1	2	4
HYDIN	3	0	0	0	1	2	4
IMMP2L	3	0	0	1	0	2	4
KCNQ3	3	0	0	1	0	2	4
MBD6	2	0	2	0	0	2	4
NRCAM	2	0	0	0	2	2	4
NTNG1	1	0	0	0	3	2	4
OTUD7A	2	0	0	0	2	2	4
PCCA	0	2	0	2	0	2	4
POU3F3	2	0	0	0	2	2	4
RASSF5	3	0	0	0	1	2	4
RIMS2	3	0	0	0	1	2	4
SLC24A2	2	0	0	0	2	2	4
SLC6A1	3	0	0	0	1	2	4
SLC9A9	3	0	0	0	1	2	4
SNTG2	3	0	0	0	1	2	4
TET2	0	0	0	2	2	2	4
TPO	3	0	0	0	1	2	4
YTHDC2	0	0	3	0	1	2	4
ZC3H4	0	0	0	2	2	2	4
ZNF18	0	0	0	2	2	2	4
ZNF804A	3	1	0	0	0	2	4
ACTN4	2	0	1	0	0	2	3
ANKRD17	2	0	0	0	1	2	3
APH1A	2	0	0	1	0	2	3
ATP10A	2	0	0	0	1	2	3
CAMK2A	2	0	0	0	1	2	3
CDC42BPB	2	1	0	0	0	2	3
CELF6	2	0	0	0	1	2	3
CLIP2	2	0	0	0	1	2	3
CLN8	1	0	2	0	0	2	3
DDX23	0	0	1	0	2	2	3
DIP2A	2	1	0	0	0	2	3
DIPK2A	0	1	0	0	2	2	3
DRD2	2	0	0	0	1	2	3
DRD3	0	0	0	2	1	2	3
EHMT1	1	0	0	2	0	2	3
ERBIN	2	0	1	0	0	2	3
EXOC6	2	0	0	1	0	2	3
EXOC6B	2	0	1	0	0	2	3
GIGYF2	0	0	0	1	2	2	3
GLIS1	2	0	0	0	1	2	3
GPHN	0	0	1	0	2	2	3
GPR37	2	0	0	0	1	2	3
GRIK3	2	0	0	0	1	2	3
HECTD4	1	0	0	0	2	2	3
HERC1	0	0	2	0	1	2	3
HNRNPD	1	0	0	0	2	2	3
ITGB3	2	0	1	0	0	2	3
KAT6A	0	1	0	2	0	2	3
KDM4C	2	0	0	0	1	2	3
LAMB1	0	0	1	0	2	2	3
LRFN5	2	0	0	0	1	2	3
MARK1	2	0	0	1	0	2	3
MKX	1	0	2	0	0	2	3
MTF1	2	0	0	0	1	2	3
NCOR1	2	0	0	1	0	2	3
NR1D1	2	0	0	1	0	2	3
PER1	1	0	0	0	2	2	3
PITX1	1	0	0	0	2	2	3
PRR12	0	0	1	0	2	2	3
PTDSS1	2	1	0	0	0	2	3
PTEN	2	0	1	0	0	2	3
PTK7	2	1	0	0	0	2	3
RAC1	1	0	0	2	0	2	3
RIMS1	0	1	2	0	0	2	3
SLC4A10	2	1	0	0	0	2	3
ST7	0	0	0	1	2	2	3
TAF6	0	0	0	1	2	2	3
TNRC6C	2	0	0	0	1	2	3
TRIP12	2	0	0	1	0	2	3
TSC1	1	0	0	2	0	2	3
TSC2	0	0	1	0	2	2	3
VWA7	2	0	1	0	0	2	3
WAC	0	2	0	1	0	2	3
ABCA7	0	0	0	1	1	2	2
ADSL	1	0	0	0	1	2	2
AGO1	1	1	0	0	0	2	2
AKAP9	1	0	0	0	1	2	2
ASH1L	0	0	0	1	1	2	2
AVPR1A	1	0	0	1	0	2	2
AVPR1B	0	0	1	1	0	2	2
BAZ2B	0	1	0	0	1	2	2
BCAS1	1	0	0	0	1	2	2
BTRC	1	0	0	1	0	2	2
CCNG1	1	0	0	0	1	2	2
CDK13	0	1	0	1	0	2	2
CDON	1	0	0	0	1	2	2
CNTN6	1	0	1	0	0	2	2
CUL3	0	1	0	0	1	2	2
CUL7	0	0	1	1	0	2	2
EMSY	1	0	1	0	0	2	2
ENPP1	1	0	0	0	1	2	2
EP300	1	0	0	0	1	2	2
EXOC3	0	1	0	0	1	2	2
GABRG3	1	1	0	0	0	2	2
GALNT10	0	0	0	1	1	2	2
GBE1	1	1	0	0	0	2	2
GNB2	0	0	1	0	1	2	2
GPR85	0	1	0	0	1	2	2
HLA-G	0	0	0	1	1	2	2
HSD11B1	1	0	1	0	0	2	2
KAT6B	1	0	0	1	0	2	2
KDM6B	1	0	0	0	1	2	2
KIAA1586	0	0	1	0	1	2	2
KIF1A	1	1	0	0	0	2	2
KMT2A	1	0	0	1	0	2	2
KMT2C	1	0	0	1	0	2	2
LDLR	1	0	0	0	1	2	2
LRRC1	1	0	0	1	0	2	2
MED12L	1	0	0	0	1	2	2
MNT	0	0	1	0	1	2	2
MRTFB	0	1	0	0	1	2	2
MSANTD2	1	1	0	0	0	2	2
MUC12	1	0	0	1	0	2	2
NINL	0	1	0	1	0	2	2
NIPBL	1	0	0	0	1	2	2
NR2F1	0	0	0	1	1	2	2
NSD1	1	0	0	0	1	2	2
NSD2	1	0	0	0	1	2	2
PACS1	1	1	0	0	0	2	2
PAH	0	0	1	1	0	2	2
PAPOLG	0	1	1	0	0	2	2
PTPN11	1	0	0	0	1	2	2
RAD21L1	1	0	0	0	1	2	2
RALA	0	0	0	1	1	2	2
RALGAPB	1	0	0	1	0	2	2
RANBP17	0	0	1	1	0	2	2
RFX7	1	0	0	0	1	2	2
RGS7	1	1	0	0	0	2	2
RNF25	0	0	1	0	1	2	2
SCFD2	1	0	0	0	1	2	2
SETD1B	0	0	1	1	0	2	2
SETD5	1	1	0	0	0	2	2
SIN3B	0	0	1	1	0	2	2
SLC12A5	0	0	1	1	0	2	2
SLC1A1	1	0	0	1	0	2	2
SLC22A15	1	0	0	0	1	2	2
SMC3	1	0	1	0	0	2	2
SNX14	1	0	1	0	0	2	2
STAG1	1	0	1	0	0	2	2
STXBP1	1	0	0	0	1	2	2
STXBP5	0	0	0	1	1	2	2
STYK1	1	0	0	1	0	2	2
SYN2	0	0	0	1	1	2	2
SYNCRIP	0	0	1	0	1	2	2
TAOK2	0	0	0	1	1	2	2
TLK2	1	0	0	0	1	2	2
TM4SF19	0	0	0	1	1	2	2
TM4SF20	1	0	1	0	0	2	2
TRIM23	1	0	0	0	1	2	2
UBR1	1	0	0	0	1	2	2
VAMP2	1	1	0	0	0	2	2
VEZF1	1	0	0	0	1	2	2
WDFY3	1	0	1	0	0	2	2
WDR26	1	0	0	1	0	2	2
ZC3H11A	1	0	0	0	1	2	2
ZNF517	1	0	0	0	1	2	2
CDH13	13	0	0	0	0	1	13
CSMD1	9	0	0	0	0	1	9
DCC	8	0	0	0	0	1	8
JMJD1C	8	0	0	0	0	1	8
DMXL2	7	0	0	0	0	1	7
KCNQ2	7	0	0	0	0	1	7
NTRK2	7	0	0	0	0	1	7
PIK3CG	6	0	0	0	0	1	6
ARNT2	5	0	0	0	0	1	5
CHRM3	5	0	0	0	0	1	5
DIXDC1	5	0	0	0	0	1	5
DPP4	5	0	0	0	0	1	5
GALNT14	5	0	0	0	0	1	5
GRIA1	5	0	0	0	0	1	5
TECTA	5	0	0	0	0	1	5
ADCY3	4	0	0	0	0	1	4
CACNA1G	4	0	0	0	0	1	4
NTRK1	4	0	0	0	0	1	4
ST8SIA2	4	0	0	0	0	1	4
ADCY5	3	0	0	0	0	1	3
ANXA1	3	0	0	0	0	1	3
CHRNA7	3	0	0	0	0	1	3
CTNNA3	3	0	0	0	0	1	3
EGR3	3	0	0	0	0	1	3
HACE1	3	0	0	0	0	1	3
INTS6	0	0	3	0	0	1	3
KATNAL2	3	0	0	0	0	1	3
LZTR1	0	0	0	0	3	1	3
MAGEL2	3	0	0	0	0	1	3
MAPK8IP1	3	0	0	0	0	1	3
MDGA2	3	0	0	0	0	1	3
NXPH1	3	0	0	0	0	1	3
PCCB	3	0	0	0	0	1	3
POMGNT1	3	0	0	0	0	1	3
PTPRB	3	0	0	0	0	1	3
SCN1A	3	0	0	0	0	1	3
SMARCA2	0	0	0	0	3	1	3
SYNE1	3	0	0	0	0	1	3
ZSWIM6	3	0	0	0	0	1	3
ACE	2	0	0	0	0	1	2
CDK19	2	0	0	0	0	1	2
CHD2	0	0	0	0	2	1	2
CMPK2	2	0	0	0	0	1	2
CNTN3	2	0	0	0	0	1	2
CNTNAP2	2	0	0	0	0	1	2
CPT2	0	0	0	2	0	1	2
CSDE1	0	0	0	2	0	1	2
DAGLA	2	0	0	0	0	1	2
DDHD2	2	0	0	0	0	1	2
DENR	0	0	2	0	0	1	2
DVL3	0	0	0	0	2	1	2
EFR3A	2	0	0	0	0	1	2
EIF4E	0	0	0	2	0	1	2
FEZF2	2	0	0	0	0	1	2
GIGYF1	2	0	0	0	0	1	2
GRIN2B	2	0	0	0	0	1	2
HECW2	2	0	0	0	0	1	2
HLA-DPB1	0	0	0	0	2	1	2
IL1R2	2	0	0	0	0	1	2
IQGAP3	2	0	0	0	0	1	2
KCNS3	2	0	0	0	0	1	2
MET	2	0	0	0	0	1	2
NCOA1	0	2	0	0	0	1	2
PDCD1	2	0	0	0	0	1	2
PPP1R1B	2	0	0	0	0	1	2
PPP1R9B	2	0	0	0	0	1	2
PPP5C	0	0	0	0	2	1	2
SERPINE1	2	0	0	0	0	1	2
SLC6A4	2	0	0	0	0	1	2
SLITRK5	2	0	0	0	0	1	2
SPEN	2	0	0	0	0	1	2
XRCC6	0	0	2	0	0	1	2
ZFYVE26	0	0	0	0	2	1	2
ABCA13	1	0	0	0	0	1	1
ACTL6B	0	1	0	0	0	1	1
ADA	1	0	0	0	0	1	1
ADNP	0	0	1	0	0	1	1
AGO3	0	1	0	0	0	1	1
AGO4	0	0	1	0	0	1	1
AHI1	1	0	0	0	0	1	1
ALDH1A3	1	0	0	0	0	1	1
ALDH5A1	0	0	0	1	0	1	1
AMT	0	0	0	0	1	1	1
APBB1	0	0	0	1	0	1	1
ASB14	1	0	0	0	0	1	1
ASXL3	0	0	0	0	1	1	1
ATP1A1	0	0	1	0	0	1	1
ATP1A3	0	0	1	0	0	1	1
BIRC6	1	0	0	0	0	1	1
BRCA2	0	0	0	1	0	1	1
CACNA1I	1	0	0	0	0	1	1
CACNB1	0	1	0	0	0	1	1
CAPRIN1	0	0	1	0	0	1	1
CDK8	0	0	0	0	1	1	1
CHMP1A	1	0	0	0	0	1	1
CHRNB3	1	0	0	0	0	1	1
CIB2	0	0	1	0	0	1	1
CNOT3	0	0	0	0	1	1	1
COL28A1	0	1	0	0	0	1	1
CSNK1E	1	0	0	0	0	1	1
CTNNB1	1	0	0	0	0	1	1
CX3CR1	0	0	0	0	1	1	1
DHCR7	0	0	0	0	1	1	1
DMWD	1	0	0	0	0	1	1
DNAH3	0	0	0	0	1	1	1
DOCK8	0	0	0	1	0	1	1
DPYD	1	0	0	0	0	1	1
DRD1	0	0	1	0	0	1	1
DUSP15	0	0	0	0	1	1	1
DYDC1	0	0	0	0	1	1	1
EEF1A2	1	0	0	0	0	1	1
EPC2	0	0	1	0	0	1	1
EPPK1	0	0	1	0	0	1	1
ESR2	1	0	0	0	0	1	1
FABP5	0	1	0	0	0	1	1
FAM98C	0	1	0	0	0	1	1
FBXO11	0	0	0	0	1	1	1
FBXO40	1	0	0	0	0	1	1
FGA	1	0	0	0	0	1	1
FRG1	1	0	0	0	0	1	1
GABBR2	0	0	0	0	1	1	1
GABRB2	1	0	0	0	0	1	1
GALNT13	1	0	0	0	0	1	1
GDA	0	0	0	1	0	1	1
GLO1	0	0	0	1	0	1	1
GNAI1	1	0	0	0	0	1	1
GRIA2	1	0	0	0	0	1	1
GTF2I	1	0	0	0	0	1	1
GUCY1A2	0	0	1	0	0	1	1
HCN1	1	0	0	0	0	1	1
HLA-B	0	0	0	0	1	1	1
HMGN1	1	0	0	0	0	1	1
HNRNPK	0	0	1	0	0	1	1
HNRNPR	1	0	0	0	0	1	1
HNRNPUL2	0	0	1	0	0	1	1
HOMER1	0	0	1	0	0	1	1
HS3ST5	1	0	0	0	0	1	1
ILF2	1	0	0	0	0	1	1
INPP1	1	0	0	0	0	1	1
KANK1	0	0	0	1	0	1	1
KCNA2	0	0	1	0	0	1	1
KCNJ15	0	0	0	0	1	1	1
KCNK7	1	0	0	0	0	1	1
KDM1B	1	0	0	0	0	1	1
KDM3B	1	0	0	0	0	1	1
KDM5A	0	0	1	0	0	1	1
KDM5B	0	0	0	0	1	1	1
KHDRBS2	0	0	0	1	0	1	1
KIAA0232	0	0	0	1	0	1	1
KIF14	1	0	0	0	0	1	1
KMT5B	1	0	0	0	0	1	1
KNG1	0	0	0	1	0	1	1
KRT26	0	0	1	0	0	1	1
LEO1	0	0	0	0	1	1	1
LIN7B	1	0	0	0	0	1	1
LRRC4	0	0	0	1	0	1	1
MAP1A	1	0	0	0	0	1	1
MAPK3	1	0	0	0	0	1	1
MCM6	0	0	0	1	0	1	1
MED13	1	0	0	0	0	1	1
MEMO1	0	0	1	0	0	1	1
MFRP	1	0	0	0	0	1	1
MTHFR	0	0	0	0	1	1	1
MUC4	1	0	0	0	0	1	1
MYO16	1	0	0	0	0	1	1
NAALADL2	0	0	0	1	0	1	1
NCKAP1	0	0	1	0	0	1	1
NDUFA5	1	0	0	0	0	1	1
NFE2L3	1	0	0	0	0	1	1
NIPA1	0	0	0	1	0	1	1
NUP133	1	0	0	0	0	1	1
ODF3L2	1	0	0	0	0	1	1
OR2M4	1	0	0	0	0	1	1
OR52M1	0	0	0	1	0	1	1
OXT	1	0	0	0	0	1	1
P2RX5	1	0	0	0	0	1	1
PACS2	1	0	0	0	0	1	1
PAFAH1B2	0	0	0	0	1	1	1
PAK2	1	0	0	0	0	1	1
PCDH15	1	0	0	0	0	1	1
PDZD8	0	1	0	0	0	1	1
PEX7	0	0	1	0	0	1	1
PHF12	0	0	1	0	0	1	1
PHF2	1	0	0	0	0	1	1
PHF7	0	0	0	0	1	1	1
PHIP	0	0	1	0	0	1	1
PLN	1	0	0	0	0	1	1
PLXNB1	0	0	0	1	0	1	1
POLA2	0	0	0	0	1	1	1
POLR3A	1	0	0	0	0	1	1
POMT1	0	0	0	1	0	1	1
POT1	1	0	0	0	0	1	1
PPFIA1	1	0	0	0	0	1	1
PPM1D	1	0	0	0	0	1	1
PPP2R5D	0	0	1	0	0	1	1
PPP3CA	0	0	0	0	1	1	1
PRPF39	0	0	0	0	1	1	1
PRUNE2	0	0	1	0	0	1	1
PTPN4	0	0	0	0	1	1	1
PTPRT	1	0	0	0	0	1	1
QRICH1	0	0	0	0	1	1	1
RAD21	0	0	1	0	0	1	1
RBM27	0	0	0	1	0	1	1
RFX3	0	0	0	1	0	1	1
RIT2	0	0	0	0	1	1	1
RSRC1	0	0	1	0	0	1	1
SBF1	0	0	0	0	1	1	1
SCAF4	1	0	0	0	0	1	1
SCN4A	1	0	0	0	0	1	1
SCP2	1	0	0	0	0	1	1
SEMA5A	0	0	1	0	0	1	1
SENP1	0	0	0	0	1	1	1
SET	0	0	0	0	1	1	1
SETDB1	1	0	0	0	0	1	1
SGSM3	0	0	0	0	1	1	1
SHANK3	1	0	0	0	0	1	1
SLC25A12	0	0	1	0	0	1	1
SLC25A27	0	0	0	1	0	1	1
SLC25A39	1	0	0	0	0	1	1
SLC27A4	0	1	0	0	0	1	1
SLC29A4	0	0	0	1	0	1	1
SLC38A10	1	0	0	0	0	1	1
SLC6A3	1	0	0	0	0	1	1
SLCO1B3	1	0	0	0	0	1	1
SMARCC2	0	1	0	0	0	1	1
SNAP25	0	0	0	0	1	1	1
SPAST	0	0	0	0	1	1	1
SPP2	0	0	1	0	0	1	1
SRSF11	1	0	0	0	0	1	1
STX1A	1	0	0	0	0	1	1
SUPT16H	0	0	1	0	0	1	1
SYCE1	0	0	0	0	1	1	1
SYNJ1	1	0	0	0	0	1	1
TAOK1	1	0	0	0	0	1	1
TBC1D23	0	0	1	0	0	1	1
TBC1D31	0	0	1	0	0	1	1
TBX1	0	0	1	0	0	1	1
TCF20	1	0	0	0	0	1	1
TERB2	1	0	0	0	0	1	1
TFB2M	0	1	0	0	0	1	1
TM9SF4	1	0	0	0	0	1	1
TMEM134	0	1	0	0	0	1	1
TNS2	0	0	0	1	0	1	1
TRAF7	0	0	0	1	0	1	1
TSPAN4	1	0	0	0	0	1	1
UBN2	1	0	0	0	0	1	1
UBR5	0	0	0	0	1	1	1
UNC80	1	0	0	0	0	1	1
USP45	0	0	0	0	1	1	1
VDR	0	0	0	0	1	1	1
WASF1	1	0	0	0	0	1	1
XPC	1	0	0	0	0	1	1
YWHAE	0	0	0	0	1	1	1
ZNF292	0	1	0	0	0	1	1
ZNF713	0	0	0	0	1	1	1

## Sheet: Table S5
Significant eQTM for placental differentially expressed genes (p<0.05) sorted by genomic coordinates using EPIC annotation (hg19).
EPIC annotation (hg19)					eQTM results				Human hg19 gene annotation (homolog)					Rhesus Mmul_10 gene annotation					RNA-seq summary
cpg	nearest gene	distance	CHR (hg19)	MAPINFO (hg19)	Beta	se	P.Value	adj.P.Val	Ensembl (hg19)	external_gene_id	chr	start_position	end_position	gene_id	gene_name	chr	gene_start	gene_end	log2FC	pvalue
cg13938959	LINC02593	20634	1	834183	26.6471	11.198	0.0445719	0.785524	ENSG00000187634	SAMD11	1	860260	879955	ENSMMUG00000005947	SAMD11	1	223480629	223499924	2.75077	0.0422185
cg24362661	SAMD11	10243	1	871546	97.5749	38.5241	0.0351005	0.775528	ENSG00000187634	SAMD11	1	860260	879955	ENSMMUG00000005947	SAMD11	1	223480629	223499924	2.75077	0.0422185
cg05819296	SAMD11	10677	1	871980	30.4236	7.20667	0.00290948	0.56545	ENSG00000187634	SAMD11	1	860260	879955	ENSMMUG00000005947	SAMD11	1	223480629	223499924	2.75077	0.0422185
cg03269716	SAMD11	240	1	874896	50.0193	16.6733	0.0170727	0.725404	ENSG00000187634	SAMD11	1	860260	879955	ENSMMUG00000005947	SAMD11	1	223480629	223499924	2.75077	0.0422185
cg14860707	KLHL17	2053	1	899515	-121.668	51.6996	0.046437	0.788487	ENSG00000187634	SAMD11	1	860260	879955	ENSMMUG00000005947	SAMD11	1	223480629	223499924	2.75077	0.0422185
cg04865998	PLEKHN1	5087	1	906965	33.7182	10.1701	0.0106122	0.672543	ENSG00000187634	SAMD11	1	860260	879955	ENSMMUG00000005947	SAMD11	1	223480629	223499924	2.75077	0.0422185
cg05505459	PERM1	5478	1	911995	23.4701	9.55025	0.0394699	0.778237	ENSG00000187634	SAMD11	1	860260	879955	ENSMMUG00000005947	SAMD11	1	223480629	223499924	2.75077	0.0422185
cg02341264	AGRN	12463	1	967967	-33.381	11.1877	0.017501	0.726332	ENSG00000187634	SAMD11	1	860260	879955	ENSMMUG00000005947	SAMD11	1	223480629	223499924	2.75077	0.0422185
cg24517686	RNF223	4289	1	1005398	24.5802	9.82823	0.0368855	0.777345	ENSG00000187634	SAMD11	1	860260	879955	ENSMMUG00000005947	SAMD11	1	223480629	223499924	2.75077	0.0422185
cg15322667	C1orf159	25481	1	1026255	77.9922	26.8528	0.0197568	0.739266	ENSG00000187634	SAMD11	1	860260	879955	ENSMMUG00000005947	SAMD11	1	223480629	223499924	2.75077	0.0422185
cg10974068	KCNAB2	19326	1	6125308	18.7478	6.76931	0.024314	0.748965	ENSG00000158292	GPR153	1	6307406	6321035	ENSMMUG00000057977	GPR153	1	218272009	218280445	1.18958	0.00851866
cg22598810	CHD5	64327	1	6175867	-11.4521	4.87991	0.0469157	0.790323	ENSG00000158292	GPR153	1	6307406	6321035	ENSMMUG00000057977	GPR153	1	218272009	218280445	1.18958	0.00851866
cg19308227	CHD5	608	1	6206323	17.7866	7.30135	0.0408141	0.782777	ENSG00000158292	GPR153	1	6307406	6321035	ENSMMUG00000057977	GPR153	1	218272009	218280445	1.18958	0.00851866
cg17613720	RPL22	14844	1	6244835	14.9722	5.8337	0.0333084	0.769691	ENSG00000158292	GPR153	1	6307406	6321035	ENSMMUG00000057977	GPR153	1	218272009	218280445	1.18958	0.00851866
cg17216583	RPL22	1088	1	6258591	15.8186	5.64795	0.0231702	0.748965	ENSG00000158292	GPR153	1	6307406	6321035	ENSMMUG00000057977	GPR153	1	218272009	218280445	1.18958	0.00851866
cg11554771	HES3	1337	1	6305590	127.312	34.8988	0.00651298	0.630967	ENSG00000158292	GPR153	1	6307406	6321035	ENSMMUG00000057977	GPR153	1	218272009	218280445	1.18958	0.00851866
cg04055049	GPR153	517	1	6321553	-72.288	29.6091	0.0404753	0.781133	ENSG00000158292	GPR153	1	6307406	6321035	ENSMMUG00000057977	GPR153	1	218272009	218280445	1.18958	0.00851866
cg19267259	ACOT7	399	1	6453427	27.2521	11.3442	0.0430222	0.784367	ENSG00000158292	GPR153	1	6307406	6321035	ENSMMUG00000057977	GPR153	1	218272009	218280445	1.18958	0.00851866
cg09273516	ACOT7	512	1	6454339	20.9343	7.8488	0.0284857	0.760693	ENSG00000158292	GPR153	1	6307406	6321035	ENSMMUG00000057977	GPR153	1	218272009	218280445	1.18958	0.00851866
cg06816518	PLEKHG5	48969	1	6531152	11.2788	3.43897	0.0111929	0.680528	ENSG00000158292	GPR153	1	6307406	6321035	ENSMMUG00000057977	GPR153	1	218272009	218280445	1.18958	0.00851866
cg20675044	PLEKHG5	29447	1	6550674	-46.4194	19.813	0.0472035	0.791209	ENSG00000158292	GPR153	1	6307406	6321035	ENSMMUG00000057977	GPR153	1	218272009	218280445	1.18958	0.00851866
cg11726911	CHD5	925	1	6241120	-18.074	7.75166	0.0480393	0.791209	ENSG00000069812	HES2	1	6472478	6484730	ENSMMUG00000022882	HES2	1	218096040	218106129	-0.791063	3.7e-06
cg17175208	CHD5	984	1	6241179	-5.31989	2.04388	0.0314785	0.766557	ENSG00000069812	HES2	1	6472478	6484730	ENSMMUG00000022882	HES2	1	218096040	218106129	-0.791063	3.7e-06
cg17216583	RPL22	1088	1	6258591	-10.1572	2.53289	0.00389428	0.578648	ENSG00000069812	HES2	1	6472478	6484730	ENSMMUG00000022882	HES2	1	218096040	218106129	-0.791063	3.7e-06
cg19694465	RNF207	1389	1	6267579	-10.792	2.70014	0.00396732	0.578648	ENSG00000069812	HES2	1	6472478	6484730	ENSMMUG00000022882	HES2	1	218096040	218106129	-0.791063	3.7e-06
cg15100947	ACOT7	119959	1	6333867	10.6123	3.57702	0.0179588	0.726332	ENSG00000069812	HES2	1	6472478	6484730	ENSMMUG00000022882	HES2	1	218096040	218106129	-0.791063	3.7e-06
cg03984604	ACOT7	117587	1	6336239	3.73276	1.56748	0.0444504	0.785524	ENSG00000069812	HES2	1	6472478	6484730	ENSMMUG00000022882	HES2	1	218096040	218106129	-0.791063	3.7e-06
cg23370548	HES2	13244	1	6471486	-9.98558	3.60651	0.024343	0.748965	ENSG00000069812	HES2	1	6472478	6484730	ENSMMUG00000022882	HES2	1	218096040	218106129	-0.791063	3.7e-06
cg23040649	HES2	166	1	6479813	-23.2369	8.8244	0.0300258	0.763295	ENSG00000069812	HES2	1	6472478	6484730	ENSMMUG00000022882	HES2	1	218096040	218106129	-0.791063	3.7e-06
cg04871364	ESPN	16213	1	6501062	24.6494	9.74906	0.0353441	0.775703	ENSG00000069812	HES2	1	6472478	6484730	ENSMMUG00000022882	HES2	1	218096040	218106129	-0.791063	3.7e-06
cg00087884	TNFRSF25	704	1	6525551	-10.0473	3.83829	0.030763	0.766557	ENSG00000069812	HES2	1	6472478	6484730	ENSMMUG00000022882	HES2	1	218096040	218106129	-0.791063	3.7e-06
cg00046539	PLEKHG5	41490	1	6538631	-13.1291	5.28536	0.0378724	0.777605	ENSG00000069812	HES2	1	6472478	6484730	ENSMMUG00000022882	HES2	1	218096040	218106129	-0.791063	3.7e-06
cg19397707	PLEKHG5	29449	1	6550672	-13.4974	5.66581	0.0443891	0.785524	ENSG00000069812	HES2	1	6472478	6484730	ENSMMUG00000022882	HES2	1	218096040	218106129	-0.791063	3.7e-06
cg21785723	PLEKHG5	28339	1	6551782	5.71865	2.41071	0.0450925	0.785968	ENSG00000069812	HES2	1	6472478	6484730	ENSMMUG00000022882	HES2	1	218096040	218106129	-0.791063	3.7e-06
cg07408569	PLEKHG5	265	1	6580387	16.7036	3.73344	0.00207208	0.551421	ENSG00000069812	HES2	1	6472478	6484730	ENSMMUG00000022882	HES2	1	218096040	218106129	-0.791063	3.7e-06
cg00547365	NOL9	9238	1	6605420	20.4848	6.03061	0.00940479	0.667237	ENSG00000069812	HES2	1	6472478	6484730	ENSMMUG00000022882	HES2	1	218096040	218106129	-0.791063	3.7e-06
cg22792644	NOL9	59	1	6614718	-4.10142	0.952545	0.0025955	0.562083	ENSG00000069812	HES2	1	6472478	6484730	ENSMMUG00000022882	HES2	1	218096040	218106129	-0.791063	3.7e-06
cg13351430	TAS1R1	168	1	6615170	12.8578	4.98678	0.0326985	0.769691	ENSG00000069812	HES2	1	6472478	6484730	ENSMMUG00000022882	HES2	1	218096040	218106129	-0.791063	3.7e-06
cg00741410	TAS1R1	15	1	6615354	3.71197	1.10167	0.0097944	0.668824	ENSG00000069812	HES2	1	6472478	6484730	ENSMMUG00000022882	HES2	1	218096040	218106129	-0.791063	3.7e-06
cg01606324	PHF13	429	1	6673327	4.60082	1.15241	0.00399217	0.578648	ENSG00000069812	HES2	1	6472478	6484730	ENSMMUG00000022882	HES2	1	218096040	218106129	-0.791063	3.7e-06
cg02900253	PHF13	47	1	6673709	7.09867	2.66055	0.0284448	0.760693	ENSG00000069812	HES2	1	6472478	6484730	ENSMMUG00000022882	HES2	1	218096040	218106129	-0.791063	3.7e-06
cg24510437	SLC2A7	11184	1	9075220	19.4738	7.75618	0.036329	0.777345	ENSG00000142583	SLC2A5	1	9095166	9148537	ENSMMUG00000016307	SLC2A5	1	215421233	215461292	-0.892796	0.011008
cg16606353	H6PD	17460	1	9277403	18.8804	7.81723	0.0421628	0.784367	ENSG00000142583	SLC2A5	1	9095166	9148537	ENSMMUG00000016307	SLC2A5	1	215421233	215461292	-0.892796	0.011008
cg26227417	MIIP	3522	1	12082822	4.89524	2.04865	0.0438904	0.785524	ENSG00000028137	TNFRSF1B	1	12227060	12269285	ENSMMUG00000021447	TNFRSF1B	1	212241154	212284626	0.540281	0.00043139
cg24512069	TNFRSF8	50768	1	12174203	9.00689	2.36351	0.00515662	0.598689	ENSG00000028137	TNFRSF1B	1	12227060	12269285	ENSMMUG00000021447	TNFRSF1B	1	212241154	212284626	0.540281	0.00043139
cg16727538	ZNF436	148	1	23696209	84.0062	30.5411	0.0250359	0.749421	ENSG00000007968	E2F2	1	23832922	23857712	ENSMMUG00000011832	E2F2	1	201239166	201262240	0.698702	0.0297495
cg15598244	ZNF436-AS1	701	1	23696413	55.2668	23.3113	0.045189	0.786097	ENSG00000007968	E2F2	1	23832922	23857712	ENSMMUG00000011832	E2F2	1	201239166	201262240	0.698702	0.0297495
cg11541124	SRSF10	1660	1	24305293	23.0797	8.21352	0.0228443	0.748965	ENSG00000142661	MYOM3	1	24382525	24438665	ENSMMUG00000023052	MYOM3	1	200622143	200681736	1.13756	0.038725
cg27425146	CLIC4	8835	1	25062925	-55.6596	13.07	0.00276671	0.562083	ENSG00000020633	RUNX3	1	25226002	25291612	ENSMMUG00000002420	RUNX3	1	199776406	199844774	2.78354	0.00361436
cg02999140	CLIC4	60680	1	25132559	-107.344	40.7579	0.0300055	0.763295	ENSG00000020633	RUNX3	1	25226002	25291612	ENSMMUG00000002420	RUNX3	1	199776406	199844774	2.78354	0.00361436
cg05656688	RUNX3	37413	1	25254088	19.335	8.28643	0.0479121	0.791209	ENSG00000020633	RUNX3	1	25226002	25291612	ENSMMUG00000002420	RUNX3	1	199776406	199844774	2.78354	0.00361436
cg14425908	RUNX3	378	1	25291991	19.0137	7.91688	0.0430644	0.784367	ENSG00000020633	RUNX3	1	25226002	25291612	ENSMMUG00000002420	RUNX3	1	199776406	199844774	2.78354	0.00361436
cg04281159	RUNX3	62753	1	25354366	85.088	29.9595	0.0218086	0.748965	ENSG00000020633	RUNX3	1	25226002	25291612	ENSMMUG00000002420	RUNX3	1	199776406	199844774	2.78354	0.00361436
cg18684672	RSRP1	92904	1	25571752	58.4427	17.0435	0.00896779	0.661058	ENSG00000117616	C1orf63	1	25568728	25664704	ENSMMUG00000002970	RSRP1	1	199494250	199499856	1.07027	0.0145402
cg27573570	EYA3	7690	1	28422839	-31.9859	11.9844	0.0284083	0.760693	ENSG00000169403	PTAFR	1	28473677	28520447	ENSMMUG00000063261	PTAFR	1	196549309	196580872	0.853451	0.0267339
cg09901136	PTAFR	72605	1	28447842	45.1249	17.591	0.0333747	0.769691	ENSG00000169403	PTAFR	1	28473677	28520447	ENSMMUG00000063261	PTAFR	1	196549309	196580872	0.853451	0.0267339
cg01877196	DNAJC8	203	1	28559339	145.953	45.267	0.0121611	0.692127	ENSG00000169403	PTAFR	1	28473677	28520447	ENSMMUG00000063261	PTAFR	1	196549309	196580872	0.853451	0.0267339
cg01408989	MED18	14935	1	28640578	16.6485	4.60389	0.00682033	0.63507	ENSG00000169403	PTAFR	1	28473677	28520447	ENSMMUG00000063261	PTAFR	1	196549309	196580872	0.853451	0.0267339
cg14352036	PHACTR4	397	1	28695696	-24.1525	9.73301	0.0380227	0.777605	ENSG00000169403	PTAFR	1	28473677	28520447	ENSMMUG00000063261	PTAFR	1	196549309	196580872	0.853451	0.0267339
cg03826835	PHACTR4	44	1	28696049	-30.7314	8.04001	0.00507301	0.598689	ENSG00000169403	PTAFR	1	28473677	28520447	ENSMMUG00000063261	PTAFR	1	196549309	196580872	0.853451	0.0267339
cg00794227	PHACTR4	872	1	28696966	-95.9298	37.5797	0.0340313	0.770277	ENSG00000169403	PTAFR	1	28473677	28520447	ENSMMUG00000063261	PTAFR	1	196549309	196580872	0.853451	0.0267339
cg05695699	KIAA1522	4088	1	33235324	7.27604	1.65576	0.00230403	0.552061	ENSG00000162522	KIAA1522	1	33207486	33240571	ENSMMUG00000019743	KIAA1522	1	191875602	191909544	-0.348251	0.0328502
cg19762870	YARS	782	1	33282851	-43.0595	11.9519	0.00695468	0.63581	ENSG00000162522	KIAA1522	1	33207486	33240571	ENSMMUG00000019743	KIAA1522	1	191875602	191909544	-0.348251	0.0328502
cg13306164	HPCA	85	1	33352184	-8.29676	3.00724	0.0247155	0.748965	ENSG00000162522	KIAA1522	1	33207486	33240571	ENSMMUG00000019743	KIAA1522	1	191875602	191909544	-0.348251	0.0328502
cg19830541	HPCA	105	1	33352204	-14.1071	5.25394	0.0277086	0.760693	ENSG00000162522	KIAA1522	1	33207486	33240571	ENSMMUG00000019743	KIAA1522	1	191875602	191909544	-0.348251	0.0328502
cg09871079	HPCA	7081	1	33359180	-11.0241	3.63986	0.0163412	0.721775	ENSG00000162522	KIAA1522	1	33207486	33240571	ENSMMUG00000019743	KIAA1522	1	191875602	191909544	-0.348251	0.0328502
cg00843917	RNF19B	15039	1	33415247	13.5112	5.11932	0.0297478	0.763295	ENSG00000162522	KIAA1522	1	33207486	33240571	ENSMMUG00000019743	KIAA1522	1	191875602	191909544	-0.348251	0.0328502
cg10677991	RNF19B	20521	1	33450808	-5.4009	1.94151	0.0238579	0.748965	ENSG00000162522	KIAA1522	1	33207486	33240571	ENSMMUG00000019743	KIAA1522	1	191875602	191909544	-0.348251	0.0328502
cg27564955	AK2	21682	1	33524195	0.988463	0.420008	0.0464315	0.788487	ENSG00000160094	ZNF362	1	33722146	33766320	ENSMMUG00000003267	ZNF362	1	191341954	191383656	-0.268575	0.0293121
cg08128087	AZIN2	46196	1	33593457	8.49898	3.16088	0.0275475	0.760693	ENSG00000160094	ZNF362	1	33722146	33766320	ENSMMUG00000003267	ZNF362	1	191341954	191383656	-0.268575	0.0293121
cg23688681	TRIM62	34423	1	33613248	1.68202	0.70686	0.0445753	0.785524	ENSG00000160094	ZNF362	1	33722146	33766320	ENSMMUG00000003267	ZNF362	1	191341954	191383656	-0.268575	0.0293121
cg19165489	ZNF362	19453	1	33741628	3.4401	1.48704	0.0494267	0.791209	ENSG00000160094	ZNF362	1	33722146	33766320	ENSMMUG00000003267	ZNF362	1	191341954	191383656	-0.268575	0.0293121
cg08864344	A3GALT2	13702	1	33772997	2.53781	1.08398	0.0473274	0.791209	ENSG00000160094	ZNF362	1	33722146	33766320	ENSMMUG00000003267	ZNF362	1	191341954	191383656	-0.268575	0.0293121
cg05395998	SNIP1	953	1	38020899	16.323	5.1729	0.0134863	0.715371	ENSG00000185090	MANEAL	1	38259474	38266809	ENSMMUG00000022040	MANEAL	1	186781168	186787146	1.68412	0.0368401
cg11397548	DNALI1	1	1	38022522	-36.8789	6.50155	0.000469135	0.460957	ENSG00000185090	MANEAL	1	38259474	38266809	ENSMMUG00000022040	MANEAL	1	186781168	186787146	1.68412	0.0368401
cg26089144	GNL2	6742	1	38068329	-22.9002	8.73936	0.0306335	0.766006	ENSG00000185090	MANEAL	1	38259474	38266809	ENSMMUG00000022040	MANEAL	1	186781168	186787146	1.68412	0.0368401
cg21165978	RSPO1	21184	1	38079411	26.304	8.99589	0.0191734	0.734846	ENSG00000185090	MANEAL	1	38259474	38266809	ENSMMUG00000022040	MANEAL	1	186781168	186787146	1.68412	0.0368401
cg24547046	C1orf109	1834	1	38156054	36.2515	12.3022	0.0185171	0.728209	ENSG00000185090	MANEAL	1	38259474	38266809	ENSMMUG00000022040	MANEAL	1	186781168	186787146	1.68412	0.0368401
cg12548638	EPHA10	4012	1	38226812	26.5531	7.831	0.00948913	0.667237	ENSG00000185090	MANEAL	1	38259474	38266809	ENSMMUG00000022040	MANEAL	1	186781168	186787146	1.68412	0.0368401
cg12746947	EPHA10	3730	1	38227094	7.92326	1.20042	0.000169318	0.459402	ENSG00000185090	MANEAL	1	38259474	38266809	ENSMMUG00000022040	MANEAL	1	186781168	186787146	1.68412	0.0368401
cg01379846	EPHA10	3303	1	38227521	14.8874	5.76724	0.0325468	0.769691	ENSG00000185090	MANEAL	1	38259474	38266809	ENSMMUG00000022040	MANEAL	1	186781168	186787146	1.68412	0.0368401
cg21978834	YRDC	542	1	38273323	82.9766	34.9343	0.0448794	0.785524	ENSG00000185090	MANEAL	1	38259474	38266809	ENSMMUG00000022040	MANEAL	1	186781168	186787146	1.68412	0.0368401
cg23762788	MTF1	41942	1	38283350	28.0782	5.69535	0.00114941	0.528423	ENSG00000185090	MANEAL	1	38259474	38266809	ENSMMUG00000022040	MANEAL	1	186781168	186787146	1.68412	0.0368401
cg27628961	MTF1	36956	1	38288336	-12.7333	4.2842	0.0178122	0.726332	ENSG00000185090	MANEAL	1	38259474	38266809	ENSMMUG00000022040	MANEAL	1	186781168	186787146	1.68412	0.0368401
cg11992079	INPP5B	73956	1	38338773	-14.1206	5.28918	0.0283744	0.760693	ENSG00000185090	MANEAL	1	38259474	38266809	ENSMMUG00000022040	MANEAL	1	186781168	186787146	1.68412	0.0368401
cg23262274	INPP5B	210	1	38412519	-14.6985	5.72598	0.0332832	0.769691	ENSG00000185090	MANEAL	1	38259474	38266809	ENSMMUG00000022040	MANEAL	1	186781168	186787146	1.68412	0.0368401
cg05749969	INPP5B	18	1	38412711	-13.8773	5.0988	0.026181	0.75505	ENSG00000185090	MANEAL	1	38259474	38266809	ENSMMUG00000022040	MANEAL	1	186781168	186787146	1.68412	0.0368401
cg02309273	INPP5B	14	1	38412744	-17.1203	6.16447	0.0240264	0.748965	ENSG00000185090	MANEAL	1	38259474	38266809	ENSMMUG00000022040	MANEAL	1	186781168	186787146	1.68412	0.0368401
cg21089270	INPP5B	522	1	38413252	-23.9181	6.4017	0.00573639	0.615566	ENSG00000185090	MANEAL	1	38259474	38266809	ENSMMUG00000022040	MANEAL	1	186781168	186787146	1.68412	0.0368401
cg06962592	SF3A3	2451	1	38458213	18.216	7.25336	0.0362926	0.777345	ENSG00000185090	MANEAL	1	38259474	38266809	ENSMMUG00000022040	MANEAL	1	186781168	186787146	1.68412	0.0368401
cg17077180	FHL3	9500	1	38461687	-40.4495	12.1936	0.0105828	0.672543	ENSG00000185090	MANEAL	1	38259474	38266809	ENSMMUG00000022040	MANEAL	1	186781168	186787146	1.68412	0.0368401
cg18452263	SAMD4B	41938	19	39875047	-130.939	52.1047	0.0362013	0.777345	ENSG00000105197	TIMM50	19	39971052	39984422	ENSMMUG00000031997	-	1	137792000	137792689	2.01736	0.0288534
cg04253011	PLEKHG2	686	19	39906496	36.085	10.618	0.00938175	0.667237	ENSG00000105197	TIMM50	19	39971052	39984422	ENSMMUG00000031997	-	1	137792000	137792689	2.01736	0.0288534
cg17899476	SUPT5H	30987	19	39967276	-41.4491	13.934	0.0177442	0.726332	ENSG00000105197	TIMM50	19	39971052	39984422	ENSMMUG00000031997	-	1	137792000	137792689	2.01736	0.0288534
cg19183842	DLL3	3800	19	39993358	212.029	88.8266	0.0440615	0.785524	ENSG00000105197	TIMM50	19	39971052	39984422	ENSMMUG00000031997	-	1	137792000	137792689	2.01736	0.0288534
cg24061048	LGALS13	12068	19	40081101	-21.7029	8.09695	0.0279098	0.760693	ENSG00000105197	TIMM50	19	39971052	39984422	ENSMMUG00000031997	-	1	137792000	137792689	2.01736	0.0288534
cg15719572	CAP1	63	1	40506319	23.317	7.50887	0.0145493	0.718665	ENSG00000131238	PPT1	1	40538379	40563375	ENSMMUG00000009189	PPT1	1	184488428	184513950	0.378332	0.0286453
cg00640324	CAP1	25735	1	40531991	2.74793	0.806728	0.00927423	0.665792	ENSG00000131238	PPT1	1	40538379	40563375	ENSMMUG00000009189	PPT1	1	184488428	184513950	0.378332	0.0286453
cg20929609	RLF	305	1	40626736	-3.18329	1.1923	0.0283672	0.760693	ENSG00000131238	PPT1	1	40538379	40563375	ENSMMUG00000009189	PPT1	1	184488428	184513950	0.378332	0.0286453
cg18348226	RLF	38	1	40627080	22.6292	8.84095	0.0336686	0.769691	ENSG00000131238	PPT1	1	40538379	40563375	ENSMMUG00000009189	PPT1	1	184488428	184513950	0.378332	0.0286453
cg18020298	RLF	324	1	40696801	-8.53816	2.17648	0.0044003	0.578648	ENSG00000131238	PPT1	1	40538379	40563375	ENSMMUG00000009189	PPT1	1	184488428	184513950	0.378332	0.0286453
cg27535302	GUCA2A	1041	1	42631437	2.92766	1.12438	0.0314318	0.766557	ENSG00000198815	FOXJ3	1	42642210	42801548	ENSMMUG00000014138	FOXJ3	1	182222091	182372132	-0.402942	0.0247817
cg10723635	RIMKLA	368	1	42846100	-6.47964	1.92179	0.00976132	0.668824	ENSG00000198815	FOXJ3	1	42642210	42801548	ENSMMUG00000014138	FOXJ3	1	182222091	182372132	-0.402942	0.0247817
cg08242458	RNF220	160570	1	45050067	11.1768	4.57051	0.0402234	0.780289	ENSG00000222009	BTBD19	1	45274154	45281257	ENSMMUG00000040001	BTBD19	1	179613258	179618212	0.529655	0.044827
cg09710584	TMEM53	20878	1	45119221	11.1284	3.93431	0.0221999	0.748965	ENSG00000222009	BTBD19	1	45274154	45281257	ENSMMUG00000040001	BTBD19	1	179613258	179618212	0.529655	0.044827
cg00367463	BEST4	3527	1	45249899	48.4323	17.8749	0.026678	0.757114	ENSG00000222009	BTBD19	1	45274154	45281257	ENSMMUG00000040001	BTBD19	1	179613258	179618212	0.529655	0.044827
cg03142856	TCTEX1D4	1205	1	45271752	167.402	66.8229	0.0366467	0.777345	ENSG00000222009	BTBD19	1	45274154	45281257	ENSMMUG00000040001	BTBD19	1	179613258	179618212	0.529655	0.044827
cg03912703	BTBD19	5194	1	45279349	-13.334	4.68692	0.0216468	0.748965	ENSG00000222009	BTBD19	1	45274154	45281257	ENSMMUG00000040001	BTBD19	1	179613258	179618212	0.529655	0.044827
cg26297462	PTCH2	16412	1	45292204	-31.4351	11.0017	0.0212394	0.746612	ENSG00000222009	BTBD19	1	45274154	45281257	ENSMMUG00000040001	BTBD19	1	179613258	179618212	0.529655	0.044827
cg06703079	PIK3R3	44535	1	46597625	-69.3769	28.9355	0.043336	0.784895	ENSG00000117461	PIK3R3	1	46505812	46642160	ENSMMUG00000015080	PIK3R3	1	178214648	178421239	0.936192	0.0449149
cg19321695	TSPAN1	5408	1	46646158	23.5078	9.93016	0.0454363	0.786097	ENSG00000117461	PIK3R3	1	46505812	46642160	ENSMMUG00000015080	PIK3R3	1	178214648	178421239	0.936192	0.0449149
cg16589100	POMGNT1	2921	1	46656676	38.4197	12.6073	0.0158831	0.719843	ENSG00000117461	PIK3R3	1	46505812	46642160	ENSMMUG00000015080	PIK3R3	1	178214648	178421239	0.936192	0.0449149
cg06955484	TAL1	2484	1	47695408	7.14082	3.07124	0.0485348	0.791209	ENSG00000162367	TAL1	1	47681962	47697892	ENSMMUG00000061850	PDZK1IP1	1	177273103	177322122	1.19635	0.0172257
cg06209689	TAL1	1544	1	47696348	9.03685	3.18973	0.0220444	0.748965	ENSG00000162367	TAL1	1	47681962	47697892	ENSMMUG00000061850	PDZK1IP1	1	177273103	177322122	1.19635	0.0172257
cg10493879	CMPK1	893	1	47798576	20.8748	6.62247	0.0135551	0.715371	ENSG00000162367	TAL1	1	47681962	47697892	ENSMMUG00000061850	PDZK1IP1	1	177273103	177322122	1.19635	0.0172257
cg13443627	TACSTD2	96	1	59043070	37.8696	14.7564	0.0333181	0.769691	ENSG00000177606	JUN	1	59246465	59249785	ENSMMUG00000059326	JUN	1	165651418	165654152	0.958256	0.0019875
cg19881776	MYSM1	71	1	59165819	278.957	104.019	0.0278482	0.760693	ENSG00000177606	JUN	1	59246465	59249785	ENSMMUG00000059326	JUN	1	165651418	165654152	0.958256	0.0019875
cg17933911	JUN	907	1	59248878	-4.74439	1.71724	0.0245683	0.748965	ENSG00000177606	JUN	1	59246465	59249785	ENSMMUG00000059326	JUN	1	165651418	165654152	0.958256	0.0019875
cg26456528	JUN	417	1	59250203	80.0903	31.9626	0.0366125	0.777345	ENSG00000177606	JUN	1	59246465	59249785	ENSMMUG00000059326	JUN	1	165651418	165654152	0.958256	0.0019875
cg02003167	LINC01135	111623	1	59362447	37.0098	13.5515	0.0258041	0.753922	ENSG00000177606	JUN	1	59246465	59249785	ENSMMUG00000059326	JUN	1	165651418	165654152	0.958256	0.0019875
cg17631709	LINC01135	144829	1	59395653	34.9942	5.31909	0.000173143	0.459402	ENSG00000177606	JUN	1	59246465	59249785	ENSMMUG00000059326	JUN	1	165651418	165654152	0.958256	0.0019875
cg16797733	LOC646626	56692	1	85798734	-50.0675	19.2078	0.0312941	0.766557	ENSG00000153904	DDAH1	1	85784164	86043933	ENSMMUG00000014573	DDAH1	1	138845008	139100130	0.771155	0.0171037
cg02572729	DDAH1	113237	1	85930809	21.5145	8.40364	0.0336397	0.769691	ENSG00000153904	DDAH1	1	85784164	86043933	ENSMMUG00000014573	DDAH1	1	138845008	139100130	0.771155	0.0171037
cg18554074	DDAH1	50972	1	85993074	35.1849	14.437	0.0407465	0.782737	ENSG00000153904	DDAH1	1	85784164	86043933	ENSMMUG00000014573	DDAH1	1	138845008	139100130	0.771155	0.0171037
cg05654711	DDAH1	113181	1	85930865	396.975	149.307	0.0288601	0.762069	ENSG00000142871	CYR61	1	86046444	86049645	ENSMMUG00000013197	CCN1	1	138839674	138842628	0.806728	0.000476958
cg18554074	DDAH1	50972	1	85993074	36.797	8.01839	0.00178071	0.529224	ENSG00000142871	CYR61	1	86046444	86049645	ENSMMUG00000013197	CCN1	1	138839674	138842628	0.806728	0.000476958
cg07165167	CCN1	917	1	86045527	-10.5143	4.09686	0.0333125	0.769691	ENSG00000142871	CYR61	1	86046444	86049645	ENSMMUG00000013197	CCN1	1	138839674	138842628	0.806728	0.000476958
cg22123915	CCN1	1362	1	86047807	-38.8566	16.539	0.0467257	0.789642	ENSG00000142871	CYR61	1	86046444	86049645	ENSMMUG00000013197	CCN1	1	138839674	138842628	0.806728	0.000476958
cg01040434	CCN1	34998	1	86081443	14.0641	4.53835	0.0146893	0.718665	ENSG00000142871	CYR61	1	86046444	86049645	ENSMMUG00000013197	CCN1	1	138839674	138842628	0.806728	0.000476958
cg19337413	CDC14A	795	1	100818819	-29.469	11.9949	0.0395164	0.778237	ENSG00000079335	CDC14A	1	100810584	100985833	ENSMMUG00000019106	CDC14A	1	123622913	123798189	0.740464	0.0206416
cg00934037	CDC14A	71648	1	100889672	-25.8213	8.00351	0.0121251	0.690983	ENSG00000079335	CDC14A	1	100810584	100985833	ENSMMUG00000019106	CDC14A	1	123622913	123798189	0.740464	0.0206416
cg20384613	CDC14A	132847	1	100950871	20.5251	8.11474	0.0352904	0.775703	ENSG00000079335	CDC14A	1	100810584	100985833	ENSMMUG00000019106	CDC14A	1	123622913	123798189	0.740464	0.0206416
cg06330917	CHI3L2	5226	1	111777560	-27.6488	10.3266	0.0280378	0.760693	ENSG00000064886	CHI3L2	1	111743393	111786062	ENSMMUG00000002455	CHI3L2	1	112915336	112933922	-0.988496	0.00731832
cg20389131	PIFO	80	1	111889115	-60.2675	17.9679	0.010018	0.668824	ENSG00000064886	CHI3L2	1	111743393	111786062	ENSMMUG00000002455	CHI3L2	1	112915336	112933922	-0.988496	0.00731832
cg16252973	PIFO	5725	1	111894921	84.7361	20.6502	0.00342167	0.573638	ENSG00000064886	CHI3L2	1	111743393	111786062	ENSMMUG00000002455	CHI3L2	1	112915336	112933922	-0.988496	0.00731832
cg22851415	INKA2	1501	1	112296918	56.2419	9.90824	0.000466999	0.460957	ENSG00000171385	KCND3	1	112313284	112531777	ENSMMUG00000050825	KCND3	1	112202406	112417240	-4.94715	0.00239601
cg17069915	KCND3	132198	1	112399579	35.2694	11.9785	0.0185841	0.72938	ENSG00000171385	KCND3	1	112313284	112531777	ENSMMUG00000050825	KCND3	1	112202406	112417240	-4.94715	0.00239601
cg05139111	PHTF1	211	1	114301887	-176.966	47.5814	0.00587797	0.616881	ENSG00000134242	PTPN22	1	114356433	114414381	ENSMMUG00000006786	PTPN22	1	110344587	110410812	-1.82327	0.0286824
cg13958304	RSBN1	607	1	114354463	-170.249	55.5654	0.0154898	0.719588	ENSG00000134242	PTPN22	1	114356433	114414381	ENSMMUG00000006786	PTPN22	1	110344587	110410812	-1.82327	0.0286824
cg12459542	RSBN1	224	1	114354846	-42.7468	15.9701	0.02807	0.760693	ENSG00000134242	PTPN22	1	114356433	114414381	ENSMMUG00000006786	PTPN22	1	110344587	110410812	-1.82327	0.0286824
cg08612201	PTPN22	15147	1	114399228	22.3771	7.63886	0.0190163	0.731572	ENSG00000134242	PTPN22	1	114356433	114414381	ENSMMUG00000006786	PTPN22	1	110344587	110410812	-1.82327	0.0286824
cg00177203	MTMR11	7649	1	149901142	10.4806	4.38904	0.0439995	0.785524	ENSG00000023902	PLEKHO1	1	150121373	150136916	ENSMMUG00000013681	PLEKHO1	1	100997193	101012503	0.623549	0.0215928
cg12072973	PLEKHO1	40	1	150121727	-9.96686	4.30201	0.049165	0.791209	ENSG00000023902	PLEKHO1	1	150121373	150136916	ENSMMUG00000013681	PLEKHO1	1	100997193	101012503	0.623549	0.0215928
cg19583621	PLEKHO1	244	1	150122012	-9.4125	4.06138	0.0491061	0.791209	ENSG00000023902	PLEKHO1	1	150121373	150136916	ENSMMUG00000013681	PLEKHO1	1	100997193	101012503	0.623549	0.0215928
cg11199810	PLEKHO1	975	1	150123146	-38.5272	14.7391	0.0309402	0.766557	ENSG00000023902	PLEKHO1	1	150121373	150136916	ENSMMUG00000013681	PLEKHO1	1	100997193	101012503	0.623549	0.0215928
cg17611391	ANP32E	689	1	150209194	-8.08929	2.17143	0.00582672	0.616434	ENSG00000023902	PLEKHO1	1	150121373	150136916	ENSMMUG00000013681	PLEKHO1	1	100997193	101012503	0.623549	0.0215928
cg05037389	CA14	14	1	150230233	-11.0602	4.48892	0.0390809	0.778237	ENSG00000023902	PLEKHO1	1	150121373	150136916	ENSMMUG00000013681	PLEKHO1	1	100997193	101012503	0.623549	0.0215928
cg07090989	APH1A	323	1	150241286	40.706	16.1087	0.0354227	0.775795	ENSG00000023902	PLEKHO1	1	150121373	150136916	ENSMMUG00000013681	PLEKHO1	1	100997193	101012503	0.623549	0.0215928
cg16269716	APH1A	171	1	150241781	-23.7732	9.25058	0.0331319	0.769691	ENSG00000023902	PLEKHO1	1	150121373	150136916	ENSMMUG00000013681	PLEKHO1	1	100997193	101012503	0.623549	0.0215928
cg08468904	RPRD2	398	1	150337389	-35.4332	14.437	0.0396677	0.778237	ENSG00000023902	PLEKHO1	1	150121373	150136916	ENSMMUG00000013681	PLEKHO1	1	100997193	101012503	0.623549	0.0215928
cg00702552	ARNT	6144	1	150855389	-35.4575	12.1021	0.0190021	0.731572	ENSG00000163141	BNIPL	1	151009046	151020076	ENSMMUG00000010071	BNIPL	1	100074429	100086239	2.01233	0.0161513
cg21937128	MINDY1	8965	1	150971889	-67.3739	28.4503	0.0453788	0.786097	ENSG00000163141	BNIPL	1	151009046	151020076	ENSMMUG00000010071	BNIPL	1	100074429	100086239	2.01233	0.0161513
cg15380890	BNIPL	58	1	151008971	-102.825	33.9769	0.0164009	0.721942	ENSG00000163141	BNIPL	1	151009046	151020076	ENSMMUG00000010071	BNIPL	1	100074429	100086239	2.01233	0.0161513
cg11584936	BNIPL	558	1	151009588	-50.6263	11.2064	0.00195603	0.537386	ENSG00000163141	BNIPL	1	151009046	151020076	ENSMMUG00000010071	BNIPL	1	100074429	100086239	2.01233	0.0161513
cg11411707	GABPB2	116	1	151043197	-216.883	67.3782	0.0122596	0.692475	ENSG00000163141	BNIPL	1	151009046	151020076	ENSMMUG00000010071	BNIPL	1	100074429	100086239	2.01233	0.0161513
cg25306932	LYSMD1	6167	1	151132257	-78.2443	30.1855	0.0320077	0.766747	ENSG00000163141	BNIPL	1	151009046	151020076	ENSMMUG00000010071	BNIPL	1	100074429	100086239	2.01233	0.0161513
cg24731279	PSMD4	7536	1	151234734	-97.2794	22.0064	0.00222497	0.551421	ENSG00000163141	BNIPL	1	151009046	151020076	ENSMMUG00000010071	BNIPL	1	100074429	100086239	2.01233	0.0161513
cg06562291	S100A13	6995	1	153599573	-30.2985	10.9254	0.0241766	0.748965	ENSG00000189171	S100A13	1	153591263	153606568	ENSMMUG00000057586	S100A13	1	97435007	97442829	-0.491204	0.0109573
cg11915664	S100A13	6799	1	153599769	-17.6206	7.3951	0.0443559	0.785524	ENSG00000189171	S100A13	1	153591263	153606568	ENSMMUG00000057586	S100A13	1	97435007	97442829	-0.491204	0.0109573
cg24884190	S100A13	88	1	153606480	90.9876	38.9233	0.0475929	0.791209	ENSG00000189171	S100A13	1	153591263	153606568	ENSMMUG00000057586	S100A13	1	97435007	97442829	-0.491204	0.0109573
cg07240937	NPR1	201	1	153650963	-15.4919	6.15427	0.0359621	0.777345	ENSG00000189171	S100A13	1	153591263	153606568	ENSMMUG00000057586	S100A13	1	97435007	97442829	-0.491204	0.0109573
cg09027266	NPR1	4997	1	153662438	7.29982	2.09961	0.00835942	0.652756	ENSG00000189171	S100A13	1	153591263	153606568	ENSMMUG00000057586	S100A13	1	97435007	97442829	-0.491204	0.0109573
cg02337980	INTS3	1228	1	153740180	38.8602	12.6387	0.0152386	0.719588	ENSG00000189171	S100A13	1	153591263	153606568	ENSMMUG00000057586	S100A13	1	97435007	97442829	-0.491204	0.0109573
cg07976390	ADAR	0	1	154600456	-43.7131	14.7948	0.0182958	0.726332	ENSG00000143603	KCNN3	1	154669931	154842756	ENSMMUG00000017793	KCNN3	1	96167296	96332109	-2.5568	0.0406147
cg10409799	ADAR	30	1	154600487	35.2976	12.3612	0.0212974	0.747054	ENSG00000143603	KCNN3	1	154669931	154842756	ENSMMUG00000017793	KCNN3	1	96167296	96332109	-2.5568	0.0406147
cg05343739	KCNN3	110816	1	154731938	27.7376	9.44889	0.0188377	0.731572	ENSG00000143603	KCNN3	1	154669931	154842756	ENSMMUG00000017793	KCNN3	1	96167296	96332109	-2.5568	0.0406147
cg17157436	KCNN3	97996	1	154744758	40.6209	15.7344	0.0325318	0.769691	ENSG00000143603	KCNN3	1	154669931	154842756	ENSMMUG00000017793	KCNN3	1	96167296	96332109	-2.5568	0.0406147
cg27332243	KCNN3	12	1	154842767	583.136	154.792	0.00548735	0.604671	ENSG00000143603	KCNN3	1	154669931	154842756	ENSMMUG00000017793	KCNN3	1	96167296	96332109	-2.5568	0.0406147
cg04481855	EFNA1	19904	1	155080445	9.14602	2.74998	0.0104486	0.671913	ENSG00000160752	FDPS	1	155278539	155290457	ENSMMUG00000023144	-	1	95692671	95704974	-0.530032	0.0342006
cg26335527	EFNA1	164	1	155100185	25.7524	10.7274	0.043135	0.784836	ENSG00000160752	FDPS	1	155278539	155290457	ENSMMUG00000023144	-	1	95692671	95704974	-0.530032	0.0342006
cg17880376	DPM3	524	1	155112472	30.8427	9.40544	0.0112006	0.680528	ENSG00000160752	FDPS	1	155278539	155290457	ENSMMUG00000023144	-	1	95692671	95704974	-0.530032	0.0342006
cg22603815	KRTCAP2	624	1	155145180	33.8191	8.58715	0.00430593	0.578648	ENSG00000160752	FDPS	1	155278539	155290457	ENSMMUG00000023144	-	1	95692671	95704974	-0.530032	0.0342006
cg06193775	TRIM46	460	1	155145882	19.4769	7.84129	0.0378814	0.777605	ENSG00000160752	FDPS	1	155278539	155290457	ENSMMUG00000023144	-	1	95692671	95704974	-0.530032	0.0342006
cg04498190	TRIM46	38	1	155146302	15.6642	6.63453	0.0458851	0.786964	ENSG00000160752	FDPS	1	155278539	155290457	ENSMMUG00000023144	-	1	95692671	95704974	-0.530032	0.0342006
cg15497761	TRIM46	166	1	155147397	4.56838	1.02841	0.00216167	0.551421	ENSG00000160752	FDPS	1	155278539	155290457	ENSMMUG00000023144	-	1	95692671	95704974	-0.530032	0.0342006
cg22500132	MUC1	45	1	155162752	6.7855	1.75533	0.00477053	0.584521	ENSG00000160752	FDPS	1	155278539	155290457	ENSMMUG00000023144	-	1	95692671	95704974	-0.530032	0.0342006
cg22531371	MUC1	49	1	155162756	7.89759	1.77943	0.00217297	0.551421	ENSG00000160752	FDPS	1	155278539	155290457	ENSMMUG00000023144	-	1	95692671	95704974	-0.530032	0.0342006
cg18383392	THBS3	7029	1	155171940	17.9729	5.32598	0.00971954	0.668824	ENSG00000160752	FDPS	1	155278539	155290457	ENSMMUG00000023144	-	1	95692671	95704974	-0.530032	0.0342006
cg06237414	THBS3	299	1	155178670	-98.2352	39.2774	0.036881	0.777345	ENSG00000160752	FDPS	1	155278539	155290457	ENSMMUG00000023144	-	1	95692671	95704974	-0.530032	0.0342006
cg14375345	GBAP1	8084	1	155200357	7.17014	2.65101	0.0268784	0.759922	ENSG00000160752	FDPS	1	155278539	155290457	ENSMMUG00000023144	-	1	95692671	95704974	-0.530032	0.0342006
cg27615508	FAM189B	4400	1	155220874	7.75044	2.525	0.01536	0.719588	ENSG00000160752	FDPS	1	155278539	155290457	ENSMMUG00000023144	-	1	95692671	95704974	-0.530032	0.0342006
cg03212674	CLK2	3694	1	155243807	14.4127	3.66267	0.00432612	0.578648	ENSG00000160752	FDPS	1	155278539	155290457	ENSMMUG00000023144	-	1	95692671	95704974	-0.530032	0.0342006
cg11702145	CLK2	287	1	155247214	-8.39105	3.4452	0.0408452	0.783087	ENSG00000160752	FDPS	1	155278539	155290457	ENSMMUG00000023144	-	1	95692671	95704974	-0.530032	0.0342006
cg00078130	HCN3	1130	1	155248349	37.9355	12.9406	0.0189544	0.731572	ENSG00000160752	FDPS	1	155278539	155290457	ENSMMUG00000023144	-	1	95692671	95704974	-0.530032	0.0342006
cg17283294	PKLR	8167	1	155263058	-27.1162	10.3011	0.030068	0.763295	ENSG00000160752	FDPS	1	155278539	155290457	ENSMMUG00000023144	-	1	95692671	95704974	-0.530032	0.0342006
cg04897644	PKLR	6853	1	155264372	7.26717	2.67912	0.0265542	0.755991	ENSG00000160752	FDPS	1	155278539	155290457	ENSMMUG00000023144	-	1	95692671	95704974	-0.530032	0.0342006
cg00764632	PKLR	14	1	155271211	12.8382	2.62728	0.00121436	0.528423	ENSG00000160752	FDPS	1	155278539	155290457	ENSMMUG00000023144	-	1	95692671	95704974	-0.530032	0.0342006
cg08264805	RUSC1-AS1	2714	1	155291224	3.19425	0.794999	0.00385225	0.578648	ENSG00000160752	FDPS	1	155278539	155290457	ENSMMUG00000023144	-	1	95692671	95704974	-0.530032	0.0342006
cg22234962	RUSC1-AS1	2641	1	155291297	18.3792	5.1298	0.00715877	0.63701	ENSG00000160752	FDPS	1	155278539	155290457	ENSMMUG00000023144	-	1	95692671	95704974	-0.530032	0.0342006
cg26876647	RUSC1-AS1	2593	1	155291345	13.9136	3.12415	0.00212918	0.551421	ENSG00000160752	FDPS	1	155278539	155290457	ENSMMUG00000023144	-	1	95692671	95704974	-0.530032	0.0342006
cg09854449	RUSC1-AS1	2533	1	155291405	10.6666	3.84876	0.0242431	0.748965	ENSG00000160752	FDPS	1	155278539	155290457	ENSMMUG00000023144	-	1	95692671	95704974	-0.530032	0.0342006
cg11503744	RUSC1	313	1	155294042	-70.0513	27.5609	0.0346195	0.773549	ENSG00000160752	FDPS	1	155278539	155290457	ENSMMUG00000023144	-	1	95692671	95704974	-0.530032	0.0342006
cg19927257	RUSC1	755	1	155294942	4.04521	1.05592	0.0050109	0.596072	ENSG00000160752	FDPS	1	155278539	155290457	ENSMMUG00000023144	-	1	95692671	95704974	-0.530032	0.0342006
cg05274128	ASH1L	98531	1	155433793	-16.1115	5.55189	0.0198314	0.739266	ENSG00000160752	FDPS	1	155278539	155290457	ENSMMUG00000023144	-	1	95692671	95704974	-0.530032	0.0342006
cg15819914	ASH1L	58423	1	155474162	10.3781	3.10714	0.0102297	0.668824	ENSG00000160752	FDPS	1	155278539	155290457	ENSMMUG00000023144	-	1	95692671	95704974	-0.530032	0.0342006
cg11961255	SYT11	1216	1	155830477	-76.0859	29.0829	0.0308334	0.766557	ENSG00000116584	ARHGEF2	1	155916630	155976861	ENSMMUG00000005092	ARHGEF2	1	94968750	95192291	0.511465	0.0447852
cg02805690	KHDC4	8732	1	155895456	8.67731	2.17594	0.00401742	0.578648	ENSG00000116584	ARHGEF2	1	155916630	155976861	ENSMMUG00000005092	ARHGEF2	1	94968750	95192291	0.511465	0.0447852
cg05331604	KHDC4	8128	1	155896060	26.0589	8.4242	0.0148146	0.719588	ENSG00000116584	ARHGEF2	1	155916630	155976861	ENSMMUG00000005092	ARHGEF2	1	94968750	95192291	0.511465	0.0447852
cg13550542	KHDC4	87	1	155904276	30.9886	5.76855	0.000668003	0.486844	ENSG00000116584	ARHGEF2	1	155916630	155976861	ENSMMUG00000005092	ARHGEF2	1	94968750	95192291	0.511465	0.0447852
cg25214914	RXFP4	957	1	155910523	-22.2825	8.33892	0.0282698	0.760693	ENSG00000116584	ARHGEF2	1	155916630	155976861	ENSMMUG00000005092	ARHGEF2	1	94968750	95192291	0.511465	0.0447852
cg14009846	RXFP4	882	1	155912363	-17.1865	5.64987	0.0160161	0.721775	ENSG00000116584	ARHGEF2	1	155916630	155976861	ENSMMUG00000005092	ARHGEF2	1	94968750	95192291	0.511465	0.0447852
cg05052384	ARHGEF2	39610	1	155920254	17.2395	4.73125	0.00655329	0.630967	ENSG00000116584	ARHGEF2	1	155916630	155976861	ENSMMUG00000005092	ARHGEF2	1	94968750	95192291	0.511465	0.0447852
cg16905438	ARHGEF2	29438	1	155930426	-14.6445	4.82619	0.0162009	0.721775	ENSG00000116584	ARHGEF2	1	155916630	155976861	ENSMMUG00000005092	ARHGEF2	1	94968750	95192291	0.511465	0.0447852
cg15733792	ARHGEF2	23306	1	155935984	4.52791	1.92986	0.0469563	0.790752	ENSG00000116584	ARHGEF2	1	155916630	155976861	ENSMMUG00000005092	ARHGEF2	1	94968750	95192291	0.511465	0.0447852
cg03856880	SSR2	195	1	155990954	41.7324	15.3227	0.0261039	0.754901	ENSG00000116584	ARHGEF2	1	155916630	155976861	ENSMMUG00000005092	ARHGEF2	1	94968750	95192291	0.511465	0.0447852
cg09243900	RAB25	122	1	156030844	4.99835	0.87543	0.000449383	0.460957	ENSG00000116584	ARHGEF2	1	155916630	155976861	ENSMMUG00000005092	ARHGEF2	1	94968750	95192291	0.511465	0.0447852
cg19580810	RAB25	215	1	156031182	6.38733	2.51507	0.0347311	0.773549	ENSG00000116584	ARHGEF2	1	155916630	155976861	ENSMMUG00000005092	ARHGEF2	1	94968750	95192291	0.511465	0.0447852
cg09716848	RAB25	528	1	156031495	9.29974	2.78202	0.0101887	0.668824	ENSG00000116584	ARHGEF2	1	155916630	155976861	ENSMMUG00000005092	ARHGEF2	1	94968750	95192291	0.511465	0.0447852
cg16126393	MEX3A	5011	1	156046778	-12.4585	4.57032	0.0260081	0.754901	ENSG00000116584	ARHGEF2	1	155916630	155976861	ENSMMUG00000005092	ARHGEF2	1	94968750	95192291	0.511465	0.0447852
cg23819092	MEX3A	4646	1	156047143	-10.1743	4.38867	0.049049	0.791209	ENSG00000116584	ARHGEF2	1	155916630	155976861	ENSMMUG00000005092	ARHGEF2	1	94968750	95192291	0.511465	0.0447852
cg00472324	LMNA	173	1	156052196	19.0632	6.70346	0.0216852	0.748965	ENSG00000116584	ARHGEF2	1	155916630	155976861	ENSMMUG00000005092	ARHGEF2	1	94968750	95192291	0.511465	0.0447852
cg22053929	LMNA	167	1	156052202	-62.1986	22.1907	0.023094	0.748965	ENSG00000116584	ARHGEF2	1	155916630	155976861	ENSMMUG00000005092	ARHGEF2	1	94968750	95192291	0.511465	0.0447852
cg21575225	LMNA	21115	1	156073485	-5.52888	2.27632	0.0412751	0.784367	ENSG00000116584	ARHGEF2	1	155916630	155976861	ENSMMUG00000005092	ARHGEF2	1	94968750	95192291	0.511465	0.0447852
cg02572204	LMNA	8309	1	156092814	-17.0847	6.12509	0.0235841	0.748965	ENSG00000116584	ARHGEF2	1	155916630	155976861	ENSMMUG00000005092	ARHGEF2	1	94968750	95192291	0.511465	0.0447852
cg18844158	LMNA	227	1	156096574	-7.41448	2.43895	0.0160624	0.721775	ENSG00000116584	ARHGEF2	1	155916630	155976861	ENSMMUG00000005092	ARHGEF2	1	94968750	95192291	0.511465	0.0447852
cg21858764	SEMA4A	29	1	156123352	7.29027	2.59711	0.0229463	0.748965	ENSG00000116584	ARHGEF2	1	155916630	155976861	ENSMMUG00000005092	ARHGEF2	1	94968750	95192291	0.511465	0.0447852
cg00702877	SLC25A44	1398	1	156162332	38.8537	9.54139	0.00357288	0.578648	ENSG00000116584	ARHGEF2	1	155916630	155976861	ENSMMUG00000005092	ARHGEF2	1	94968750	95192291	0.511465	0.0447852
cg04586819	SLC25A44	29	1	156163701	-87.8832	38.1038	0.0499678	0.791678	ENSG00000116584	ARHGEF2	1	155916630	155976861	ENSMMUG00000005092	ARHGEF2	1	94968750	95192291	0.511465	0.0447852
cg17587500	VANGL2	7378	1	160377743	32.4526	12.7776	0.0347216	0.773549	ENSG00000066294	CD84	1	160510885	160549306	ENSMMUG00000015470	CD84	1	90327613	90367805	1.27118	0.0215853
cg12034938	CD84	28960	1	160520346	25.1537	9.43226	0.0285045	0.760745	ENSG00000066294	CD84	1	160510885	160549306	ENSMMUG00000015470	CD84	1	90327613	90367805	1.27118	0.0215853
cg23369246	LY9	16301	1	160749563	-35.6818	14.0727	0.0349532	0.774939	ENSG00000066294	CD84	1	160510885	160549306	ENSMMUG00000015470	CD84	1	90327613	90367805	1.27118	0.0215853
cg03391019	ATF6	191912	1	161927947	-13.0769	2.98265	0.00233526	0.55529	ENSG00000162745	OLFML2B	1	161952982	161993644	ENSMMUG00000023042	OLFML2B	1	88964010	89004537	0.877432	0.000914752
cg03334538	OLFML2B	13843	1	161979801	9.24795	1.80393	0.000899904	0.518918	ENSG00000162745	OLFML2B	1	161952982	161993644	ENSMMUG00000023042	OLFML2B	1	88964010	89004537	0.877432	0.000914752
cg16805648	OLFML2B	13246	1	161980398	8.12383	2.57132	0.013407	0.715371	ENSG00000162745	OLFML2B	1	161952982	161993644	ENSMMUG00000023042	OLFML2B	1	88964010	89004537	0.877432	0.000914752
cg20172280	OLFML2B	102	1	161993542	6.446	2.72955	0.0458467	0.786964	ENSG00000162745	OLFML2B	1	161952982	161993644	ENSMMUG00000023042	OLFML2B	1	88964010	89004537	0.877432	0.000914752
cg24623497	OLFML2B	100	1	161993745	6.60902	2.63903	0.0366931	0.777345	ENSG00000162745	OLFML2B	1	161952982	161993644	ENSMMUG00000023042	OLFML2B	1	88964010	89004537	0.877432	0.000914752
cg23920016	NOS1AP	67250	1	162106832	8.78968	1.83141	0.00135659	0.528423	ENSG00000162745	OLFML2B	1	161952982	161993644	ENSMMUG00000023042	OLFML2B	1	88964010	89004537	0.877432	0.000914752
cg03927165	NUF2	392	1	163292116	-119.943	40.0472	0.0172015	0.726332	ENSG00000143248	RGS5	1	163080911	163291577	ENSMMUG00000005186	RGS5	1	20672995	20851390	0.635734	0.0419916
cg15548006	DCAF6	54539	1	167992289	-27.7394	10.0795	0.0249788	0.749078	ENSG00000213064	SFT2D2	1	168195176	168222263	ENSMMUG00000005283	SFT2D2	1	25571331	25588009	-1.2533	0.00398605
cg24535040	GPR161	32720	1	168074185	12.5107	4.43	0.0223529	0.748965	ENSG00000213064	SFT2D2	1	168195176	168222263	ENSMMUG00000005283	SFT2D2	1	25571331	25588009	-1.2533	0.00398605
cg04438377	GPR161	2460	1	168104445	20.6707	6.27889	0.0109876	0.680357	ENSG00000213064	SFT2D2	1	168195176	168222263	ENSMMUG00000005283	SFT2D2	1	25571331	25588009	-1.2533	0.00398605
cg22745903	TBX19	10063	1	168205319	-9.58544	3.5646	0.0275364	0.760693	ENSG00000213064	SFT2D2	1	168195176	168222263	ENSMMUG00000005283	SFT2D2	1	25571331	25588009	-1.2533	0.00398605
cg10946497	TBX19	10749	1	168206005	34.5633	11.579	0.0174668	0.726332	ENSG00000213064	SFT2D2	1	168195176	168222263	ENSMMUG00000005283	SFT2D2	1	25571331	25588009	-1.2533	0.00398605
cg04272306	TBX19	37479	1	168232735	43.6705	16.766	0.0313877	0.766557	ENSG00000213064	SFT2D2	1	168195176	168222263	ENSMMUG00000005283	SFT2D2	1	25571331	25588009	-1.2533	0.00398605
cg15505103	TBX19	54687	1	168249943	-20.3081	7.89021	0.0329304	0.769691	ENSG00000213064	SFT2D2	1	168195176	168222263	ENSMMUG00000005283	SFT2D2	1	25571331	25588009	-1.2533	0.00398605
cg10476763	FAM163A	41332	1	179753631	6.29073	2.3104	0.0261359	0.754901	ENSG00000143337	TOR1AIP1	1	179851177	179894135	ENSMMUG00000014873	TOR1AIP1	1	37090215	37127721	-0.374431	0.0331633
cg16054590	TOR1AIP2	44	1	179846986	-21.8141	8.11044	0.0275124	0.760693	ENSG00000143337	TOR1AIP1	1	179851177	179894135	ENSMMUG00000014873	TOR1AIP1	1	37090215	37127721	-0.374431	0.0331633
cg27112889	TOR1AIP1	195	1	179850982	4.47455	1.85987	0.0427853	0.784367	ENSG00000143337	TOR1AIP1	1	179851177	179894135	ENSMMUG00000014873	TOR1AIP1	1	37090215	37127721	-0.374431	0.0331633
cg22237670	SHCBP1L	28	1	182922582	-1.52024	0.636826	0.0440473	0.785524	ENSG00000135862	LAMC1	1	182992595	183114727	ENSMMUG00000015084	LAMC1	1	40270068	40389058	0.255239	0.0439043
cg12858504	LAMC2	29521	1	183184696	2.07137	0.623908	0.0105402	0.672543	ENSG00000135862	LAMC1	1	182992595	183114727	ENSMMUG00000015084	LAMC1	1	40270068	40389058	0.255239	0.0439043
cg06251097	TNNT2	165	1	201346994	3.19478	1.17807	0.0265808	0.755991	ENSG00000159166	LAD1	1	201342372	201368736	ENSMMUG00000013507	LAD1	1	58798356	58820089	-0.226009	0.0342704
cg03575211	TNNI1	1107	1	201400102	4.40434	1.67498	0.0302022	0.763295	ENSG00000159166	LAD1	1	201342372	201368736	ENSMMUG00000013507	LAD1	1	58798356	58820089	-0.226009	0.0342704
cg04214350	PHLDA3	478	1	201437821	9.67597	2.66889	0.00672912	0.63507	ENSG00000159166	LAD1	1	201342372	201368736	ENSMMUG00000013507	LAD1	1	58798356	58820089	-0.226009	0.0342704
cg00962755	PHLDA3	701	1	201439001	4.99416	1.80562	0.0244513	0.748965	ENSG00000159166	LAD1	1	201342372	201368736	ENSMMUG00000013507	LAD1	1	58798356	58820089	-0.226009	0.0342704
cg02374917	CSRP1	12853	1	201463534	5.47645	1.13596	0.00131971	0.528423	ENSG00000159166	LAD1	1	201342372	201368736	ENSMMUG00000013507	LAD1	1	58798356	58820089	-0.226009	0.0342704
cg18342253	CSRP1	16	1	201476371	-7.86174	2.73533	0.0206967	0.74183	ENSG00000159166	LAD1	1	201342372	201368736	ENSMMUG00000013507	LAD1	1	58798356	58820089	-0.226009	0.0342704
cg22030053	RPS10P7	31973	1	201521006	2.02327	0.575156	0.0078715	0.642235	ENSG00000159166	LAD1	1	201342372	201368736	ENSMMUG00000013507	LAD1	1	58798356	58820089	-0.226009	0.0342704
cg19412736	TMCC2	17477	1	205215537	15.8624	4.62623	0.00897079	0.661058	ENSG00000163545	NUAK2	1	205271187	205290883	ENSMMUG00000049565	NUAK2	1	62825225	62847243	0.780369	0.0415527
cg27179367	PLXNA2	69700	1	208347965	-22.9901	8.15834	0.0225637	0.748965	ENSG00000076356	PLXNA2	1	208195587	208417665	ENSMMUG00000004563	PLXNA2	1	65521439	65742229	0.524925	0.0189434
cg13228105	PLXNA2	360	1	208417305	-68.6734	18.5451	0.0060162	0.617796	ENSG00000076356	PLXNA2	1	208195587	208417665	ENSMMUG00000004563	PLXNA2	1	65521439	65742229	0.524925	0.0189434
cg01061025	DTL	305	1	212209225	61.6012	22.5344	0.0257005	0.75323	ENSG00000143476	DTL	1	212208919	212280742	ENSMMUG00000010176	DTL	1	69530391	69680083	0.596234	0.0478749
cg02432502	DTL	116836	1	212325756	-6.22884	2.10089	0.018012	0.726332	ENSG00000143476	DTL	1	212208919	212280742	ENSMMUG00000010176	DTL	1	69530391	69680083	0.596234	0.0478749
cg26051910	SUSD4	71455	1	223466089	30.8913	9.6387	0.0125194	0.701678	ENSG00000187554	TLR5	1	223282748	223316624	ENSMMUG00000000870	TLR5	1	80785623	80817813	1.26164	0.00650466
cg05306109	ITPKB	2619	1	226924257	-4.93535	1.89794	0.0315998	0.766557	ENSG00000143801	PSEN2	1	227057885	227083806	ENSMMUG00000018525	PSEN2	1	84453713	84480373	-0.784033	0.00351178
cg22975054	COQ8A	25062	1	227153001	-66.2761	18.6385	0.00744546	0.639999	ENSG00000143801	PSEN2	1	227057885	227083806	ENSMMUG00000018525	PSEN2	1	84453713	84480373	-0.784033	0.00351178
cg00650088	COQ8A	4702	1	227169808	-118.872	50.9123	0.0477993	0.791209	ENSG00000143801	PSEN2	1	227057885	227083806	ENSMMUG00000018525	PSEN2	1	84453713	84480373	-0.784033	0.00351178
cg22223430	PSEN2	42302	1	227015971	-31.8477	11.5326	0.0246166	0.748965	ENSG00000163050	ADCK3	1	227085237	227175246	ENSMMUG00000008636	COQ8A	1	84515299	84560802	-0.606246	0.0479227
cg17875254	COQ8A	43115	1	227127705	-6.69044	2.33027	0.0207938	0.743488	ENSG00000163050	ADCK3	1	227085237	227175246	ENSMMUG00000008636	COQ8A	1	84515299	84560802	-0.606246	0.0479227
cg21440977	COG2	9759	1	230768443	-5.18002	1.8463	0.0229977	0.748965	ENSG00000119280	C1orf198	1	230972865	231005335	ENSMMUG00000005886	C1H1orf198	1	18113468	18153592	0.512088	0.00442262
cg19181184	COG2	9168	1	230823545	21.1587	8.18352	0.0323374	0.768164	ENSG00000119280	C1orf198	1	230972865	231005335	ENSMMUG00000005886	C1H1orf198	1	18113468	18153592	0.512088	0.00442262
cg03704061	CAPN9	169	1	230883300	-2.99438	1.19379	0.0364679	0.777345	ENSG00000119280	C1orf198	1	230972865	231005335	ENSMMUG00000005886	C1H1orf198	1	18113468	18153592	0.512088	0.00442262
cg06770908	FAM89A	20546	1	231155449	2.05309	0.596343	0.00878746	0.657596	ENSG00000119280	C1orf198	1	230972865	231005335	ENSMMUG00000005886	C1H1orf198	1	18113468	18153592	0.512088	0.00442262
cg06770908	FAM89A	20546	1	231155449	2.37644	0.591049	0.00383734	0.578648	ENSG00000143643	TTC13	1	231041989	231114621	ENSMMUG00000005888	TTC13	1	18009968	18112017	0.573608	0.00264983
cg02298525	MAP3K21	84493	1	233596023	6.69855	2.85879	0.0471834	0.791209	ENSG00000135750	KCNK1	1	233749750	233808258	ENSMMUG00000022429	KCNK1	1	15334490	15387870	0.795396	0.00384855
cg04581129	KCNK1	78320	1	233843674	5.00027	1.60013	0.0141236	0.717622	ENSG00000135750	KCNK1	1	233749750	233808258	ENSMMUG00000022429	KCNK1	1	15334490	15387870	0.795396	0.00384855
cg05669709	GPR137B	59914	1	236365747	11.4062	4.18016	0.0258999	0.754282	ENSG00000077585	GPR137B	1	236305832	236385165	ENSMMUG00000014263	GPR137B	1	12809297	12880155	0.608445	0.0230768
cg10347832	ERO1B	29775	1	236475115	10.6966	2.76511	0.00475198	0.583971	ENSG00000077585	GPR137B	1	236305832	236385165	ENSMMUG00000014263	GPR137B	1	12809297	12880155	0.608445	0.0230768
cg03880814	EDARADD	46634	1	236511046	-17.2585	5.03054	0.00894504	0.661058	ENSG00000077585	GPR137B	1	236305832	236385165	ENSMMUG00000014263	GPR137B	1	12809297	12880155	0.608445	0.0230768
cg12379156	EDARADD	41071	1	236516609	11.7146	3.0978	0.00537588	0.599556	ENSG00000077585	GPR137B	1	236305832	236385165	ENSMMUG00000014263	GPR137B	1	12809297	12880155	0.608445	0.0230768
cg02130040	LMCD1	106	3	8543600	-66.0851	16.2291	0.00357348	0.578648	ENSG00000071282	LMCD1	3	8543393	8609805	ENSMMUG00000001814	LMCD1	2	139885919	139952985	-1.06601	0.0127288
cg08302640	CAPN7	13	3	15247747	13.9474	5.38963	0.0322224	0.767241	ENSG00000131370	SH3BP5	3	15296360	15382875	ENSMMUG00000006661	SH3BP5	2	32328944	32405562	0.743216	0.0430276
cg14503796	CAPN7	708	3	15248442	-43.4357	8.45957	0.000891133	0.518918	ENSG00000131370	SH3BP5	3	15296360	15382875	ENSMMUG00000006661	SH3BP5	2	32328944	32405562	0.743216	0.0430276
cg09251074	SH3BP5	37275	3	15345626	19.1749	6.2017	0.0148473	0.719588	ENSG00000131370	SH3BP5	3	15296360	15382875	ENSMMUG00000006661	SH3BP5	2	32328944	32405562	0.743216	0.0430276
cg02275418	SH3BP5	10175	3	15372726	-20.6477	6.90846	0.0173669	0.726332	ENSG00000131370	SH3BP5	3	15296360	15382875	ENSMMUG00000006661	SH3BP5	2	32328944	32405562	0.743216	0.0430276
cg03526452	FBXL2	1945	3	33316989	6.67961	2.19972	0.0161471	0.721775	ENSG00000170275	CRTAP	3	33155471	33189265	ENSMMUG00000009010	CRTAP	2	14557242	14584720	0.388061	0.021507
cg05048199	FBXL2	65	3	33319000	-38.9217	15.5795	0.0370424	0.777345	ENSG00000170275	CRTAP	3	33155471	33189265	ENSMMUG00000009010	CRTAP	2	14557242	14584720	0.388061	0.021507
cg05708892	SCN5A	5893	3	38681374	-69.021	27.0633	0.0341559	0.770978	ENSG00000185313	SCN10A	3	38738293	38835501	ENSMMUG00000015827	SCN10A	2	94148898	94249430	-1.33027	0.0163597
cg23151298	SCN10A	10856	3	38846358	-9.74058	2.32157	0.00301421	0.56545	ENSG00000185313	SCN10A	3	38738293	38835501	ENSMMUG00000015827	SCN10A	2	94148898	94249430	-1.33027	0.0163597
cg23462788	SCN11A	50561	3	38941491	-17.0152	5.9548	0.0212364	0.746612	ENSG00000185313	SCN10A	3	38738293	38835501	ENSMMUG00000015827	SCN10A	2	94148898	94249430	-1.33027	0.0163597
cg26331595	TTC21A	28	3	39149181	56.6622	21.2626	0.0285883	0.760745	ENSG00000168329	CX3CR1	3	39304985	39323226	ENSMMUG00000065286	CX3CR1	2	94725016	94741513	1.71758	0.0414599
cg21651249	TTC21A	1018	3	39174031	-21.2405	4.9828	0.00275102	0.562083	ENSG00000168329	CX3CR1	3	39304985	39323226	ENSMMUG00000065286	CX3CR1	2	94725016	94741513	1.71758	0.0414599
cg06706443	RPSA	3307	3	39444897	-126.36	53.7394	0.0465831	0.788516	ENSG00000168329	CX3CR1	3	39304985	39323226	ENSMMUG00000065286	CX3CR1	2	94725016	94741513	1.71758	0.0414599
cg21908796	RPSA	118	3	39448086	53.988	18.75	0.0205314	0.741367	ENSG00000168329	CX3CR1	3	39304985	39323226	ENSMMUG00000065286	CX3CR1	2	94725016	94741513	1.71758	0.0414599
cg09695948	RPSA	22273	3	39470478	-65.1156	17.0959	0.00517119	0.598689	ENSG00000168329	CX3CR1	3	39304985	39323226	ENSMMUG00000065286	CX3CR1	2	94725016	94741513	1.71758	0.0414599
cg13526476	MOBP	11337	3	39497727	42.6873	15.3847	0.0241224	0.748965	ENSG00000168329	CX3CR1	3	39304985	39323226	ENSMMUG00000065286	CX3CR1	2	94725016	94741513	1.71758	0.0414599
cg16859511	EXOSC7	40436	3	45058178	-21.3504	8.17386	0.0310321	0.766557	ENSG00000163814	CDCP1	3	45123770	45187914	ENSMMUG00000005742	CDCP1	2	101079818	101142307	0.902131	0.047032
cg07343122	FYCO1	25614	3	46000900	81.194	25.6474	0.0132788	0.713636	ENSG00000163823	CCR1	3	46243200	46249887	ENSMMUG00000056769	CCR1	2	102201904	102212051	1.8163	0.0494487
cg04415535	FYCO1	2831	3	46034485	45.452	18.1575	0.0367582	0.777345	ENSG00000163823	CCR1	3	46243200	46249887	ENSMMUG00000056769	CCR1	2	102201904	102212051	1.8163	0.0494487
cg09257432	XCR1	6391	3	46062588	121.951	47.143	0.0322723	0.767241	ENSG00000163823	CCR1	3	46243200	46249887	ENSMMUG00000056769	CCR1	2	102201904	102212051	1.8163	0.0494487
cg01297500	CCR3	40293	3	46245390	-31.8244	10.7566	0.0181853	0.726332	ENSG00000163823	CCR1	3	46243200	46249887	ENSMMUG00000056769	CCR1	2	102201904	102212051	1.8163	0.0494487
cg07115110	CCR3	44927	3	46250024	-34.0189	13.0439	0.0312255	0.766557	ENSG00000163823	CCR1	3	46243200	46249887	ENSMMUG00000056769	CCR1	2	102201904	102212051	1.8163	0.0494487
cg01506627	CCRL2	214	3	46449289	-11.5097	4.75596	0.0418457	0.784367	ENSG00000121797	CCRL2	3	46448654	46454488	ENSMMUG00000014260	CCRL2	2	102411358	102424012	1.65881	0.0129706
cg04847265	LTF	43775	3	46482949	-9.60646	3.48757	0.0248858	0.749078	ENSG00000121797	CCRL2	3	46448654	46454488	ENSMMUG00000014260	CCRL2	2	102411358	102424012	1.65881	0.0129706
cg17281763	PFKFB4	4168	3	48594394	-8.955	3.02769	0.01821	0.726332	ENSG00000010256	UQCRC1	3	48636435	48648409	ENSMMUG00000014705	UQCRC1	2	104657730	104669607	-0.298247	0.0396862
cg01364498	PFKFB4	4162	3	48594400	-33.4742	13.4086	0.037146	0.777345	ENSG00000010256	UQCRC1	3	48636435	48648409	ENSMMUG00000014705	UQCRC1	2	104657730	104669607	-0.298247	0.0396862
cg10678253	UQCRC1	8688	3	48638410	-3.34749	1.00177	0.010207	0.668824	ENSG00000010256	UQCRC1	3	48636435	48648409	ENSMMUG00000014705	UQCRC1	2	104657730	104669607	-0.298247	0.0396862
cg08015507	NCKIPSD	2956	3	48720378	13.3309	5.58762	0.0441441	0.785524	ENSG00000010256	UQCRC1	3	48636435	48648409	ENSMMUG00000014705	UQCRC1	2	104657730	104669607	-0.298247	0.0396862
cg23364287	IP6K2	144	3	48754776	36.159	13.7265	0.0299802	0.763295	ENSG00000010256	UQCRC1	3	48636435	48648409	ENSMMUG00000014705	UQCRC1	2	104657730	104669607	-0.298247	0.0396862
cg19472611	PRKAR2A	217	3	48885488	-5.79759	2.34076	0.0383024	0.777605	ENSG00000177479	ARIH2	3	48956254	49023815	ENSMMUG00000039597	ARIH2	2	104985663	105057768	-0.260371	0.0328344
cg20856064	P4HTM	131	3	49027210	-5.26687	1.77866	0.0181146	0.726332	ENSG00000177479	ARIH2	3	48956254	49023815	ENSMMUG00000039597	ARIH2	2	104985663	105057768	-0.260371	0.0328344
cg07006155	P4HTM	435	3	49038942	-2.95771	0.959895	0.0150875	0.719588	ENSG00000177479	ARIH2	3	48956254	49023815	ENSMMUG00000039597	ARIH2	2	104985663	105057768	-0.260371	0.0328344
cg07595372	P4HTM	14281	3	49041623	-20.7505	8.34976	0.0378061	0.777605	ENSG00000177479	ARIH2	3	48956254	49023815	ENSMMUG00000039597	ARIH2	2	104985663	105057768	-0.260371	0.0328344
cg15463769	DALRD3	435	3	49058069	22.5475	8.93943	0.0356833	0.776146	ENSG00000177479	ARIH2	3	48956254	49023815	ENSMMUG00000039597	ARIH2	2	104985663	105057768	-0.260371	0.0328344
cg14069251	NDUFAF3	694	3	49058603	-11.5746	2.20808	0.000781487	0.512681	ENSG00000177479	ARIH2	3	48956254	49023815	ENSMMUG00000039597	ARIH2	2	104985663	105057768	-0.260371	0.0328344
cg23437162	QRICH1	64353	3	49067151	8.60374	3.49097	0.0390397	0.778237	ENSG00000177479	ARIH2	3	48956254	49023815	ENSMMUG00000039597	ARIH2	2	104985663	105057768	-0.260371	0.0328344
cg07188239	USP19	11985	3	49146386	9.11542	2.89261	0.0135723	0.715371	ENSG00000177479	ARIH2	3	48956254	49023815	ENSMMUG00000039597	ARIH2	2	104985663	105057768	-0.260371	0.0328344
cg19979540	USP19	172	3	49158199	-22.5072	7.48572	0.0168989	0.72407	ENSG00000177479	ARIH2	3	48956254	49023815	ENSMMUG00000039597	ARIH2	2	104985663	105057768	-0.260371	0.0328344
cg02687550	LAMB2	10946	3	49159653	6.01553	2.26766	0.0291315	0.762326	ENSG00000177479	ARIH2	3	48956254	49023815	ENSMMUG00000039597	ARIH2	2	104985663	105057768	-0.260371	0.0328344
cg12048331	WDR82	10509	3	52302150	60.8846	18.5289	0.0110894	0.680357	ENSG00000114854	TNNC1	3	52485118	52488086	ENSMMUG00000005618	TNNC1	2	108607520	108610260	-1.18496	0.0168
cg13529018	DNAH1	3717	3	52422520	-25.3697	8.322	0.0158569	0.719787	ENSG00000114854	TNNC1	3	52485118	52488086	ENSMMUG00000005618	TNNC1	2	108607520	108610260	-1.18496	0.0168
cg21593670	NISCH	349	3	52489874	12.2252	3.84404	0.0129915	0.706828	ENSG00000114854	TNNC1	3	52485118	52488086	ENSMMUG00000005618	TNNC1	2	108607520	108610260	-1.18496	0.0168
cg26435502	NISCH	27151	3	52516676	57.8448	17.5522	0.0109307	0.680236	ENSG00000114854	TNNC1	3	52485118	52488086	ENSMMUG00000005618	TNNC1	2	108607520	108610260	-1.18496	0.0168
cg14797674	NISCH	770	3	52521983	44.3934	12.333	0.00698663	0.63581	ENSG00000114854	TNNC1	3	52485118	52488086	ENSMMUG00000005618	TNNC1	2	108607520	108610260	-1.18496	0.0168
cg13267324	STAB1	72	3	52529284	18.7859	7.8764	0.0441936	0.785524	ENSG00000114854	TNNC1	3	52485118	52488086	ENSMMUG00000005618	TNNC1	2	108607520	108610260	-1.18496	0.0168
cg11384281	PSMD6	460	3	64009226	162.155	68.7256	0.0459972	0.787667	ENSG00000163632	C3orf49	3	63805038	63834312	ENSMMUG00000012780	C2H3orf49	2	119958371	119985415	-1.65347	0.0151856
cg25121125	ADAMTS9-AS2	3767	3	64674314	-22.8853	6.71942	0.00927997	0.665792	ENSG00000163638	ADAMTS9	3	64501333	64673676	ENSMMUG00000000265	ADAMTS9	2	120658454	120826867	1.06339	0.00172127
cg07316959	RABL3	48329	3	120413055	18.2949	7.60007	0.0426946	0.784367	ENSG00000144840	RABL3	3	120405528	120461840	ENSMMUG00000001594	RABL3	2	155547074	155614330	-0.351232	0.0157213
cg14968445	GTF2E1	38669	3	120500228	-6.33909	2.23727	0.0220344	0.748965	ENSG00000144840	RABL3	3	120405528	120461840	ENSMMUG00000001594	RABL3	2	155547074	155614330	-0.351232	0.0157213
cg17583204	GTF2E1	52854	3	120514413	-3.76923	0.727306	0.000840236	0.512681	ENSG00000144840	RABL3	3	120405528	120461840	ENSMMUG00000001594	RABL3	2	155547074	155614330	-0.351232	0.0157213
cg20680174	STXBP5L	335	3	120626715	14.4372	3.97455	0.0066618	0.634431	ENSG00000144840	RABL3	3	120405528	120461840	ENSMMUG00000001594	RABL3	2	155547074	155614330	-0.351232	0.0157213
cg03602730	STXBP5L	139	3	120626911	-20.5171	6.75231	0.016099	0.721775	ENSG00000144840	RABL3	3	120405528	120461840	ENSMMUG00000001594	RABL3	2	155547074	155614330	-0.351232	0.0157213
cg23901606	SEMA5B	51204	3	122695455	-22.6487	9.59293	0.045888	0.786964	ENSG00000065485	PDIA5	3	122785909	122944074	ENSMMUG00000007696	PDIA5	2	153163080	153256288	0.488564	0.0123454
cg26112863	PDIA5	102	3	122785754	26.4787	8.55922	0.0148089	0.719588	ENSG00000065485	PDIA5	3	122785909	122944074	ENSMMUG00000007696	PDIA5	2	153163080	153256288	0.488564	0.0123454
cg10699496	ADCY5	161816	3	123005576	6.37275	2.25098	0.0221127	0.748965	ENSG00000065485	PDIA5	3	122785909	122944074	ENSMMUG00000007696	PDIA5	2	153163080	153256288	0.488564	0.0123454
cg23196625	ADCY5	154309	3	123013083	6.28715	2.40668	0.0310156	0.766557	ENSG00000065485	PDIA5	3	122785909	122944074	ENSMMUG00000007696	PDIA5	2	153163080	153256288	0.488564	0.0123454
cg06704738	ADCY5	148947	3	123018445	8.17856	1.21797	0.000150377	0.459402	ENSG00000065485	PDIA5	3	122785909	122944074	ENSMMUG00000007696	PDIA5	2	153163080	153256288	0.488564	0.0123454
cg17554032	ADCY5	104281	3	123019127	6.81198	2.48001	0.0251851	0.750401	ENSG00000065485	PDIA5	3	122785909	122944074	ENSMMUG00000007696	PDIA5	2	153163080	153256288	0.488564	0.0123454
cg00149976	MGLL	564	3	127541529	89.38	21.4025	0.00309592	0.56545	ENSG00000058262	SEC61A1	3	127770484	127790526	ENSMMUG00000018661	SEC61A1	2	148445636	148462444	-0.334759	0.00775971
cg20437228	MGLL	1468	3	127543562	-4.30272	1.2511	0.00883478	0.657596	ENSG00000058262	SEC61A1	3	127770484	127790526	ENSMMUG00000018661	SEC61A1	2	148445636	148462444	-0.334759	0.00775971
cg13703364	RUVBL1	29866	3	127842891	-30.6453	9.85158	0.0144303	0.718665	ENSG00000058262	SEC61A1	3	127770484	127790526	ENSMMUG00000018661	SEC61A1	2	148445636	148462444	-0.334759	0.00775971
cg03038916	RUVBL1	8872	3	127863885	-5.92321	2.07697	0.0214181	0.748965	ENSG00000058262	SEC61A1	3	127770484	127790526	ENSMMUG00000018661	SEC61A1	2	148445636	148462444	-0.334759	0.00775971
cg25447091	HMCES	332	3	128997352	13.917	5.89684	0.045953	0.787667	ENSG00000163913	IFT122	3	129158968	129239198	ENSMMUG00000012727	IFT122	2	146959719	147055823	0.756652	0.0391473
cg10197869	H1FX-AS1	55	3	129035170	58.6078	20.6903	0.0220608	0.748965	ENSG00000163913	IFT122	3	129158968	129239198	ENSMMUG00000012727	IFT122	2	146959719	147055823	0.756652	0.0391473
cg24451074	H1FX-AS1	468	3	129035583	-180.067	49.7981	0.00682259	0.63507	ENSG00000163913	IFT122	3	129158968	129239198	ENSMMUG00000012727	IFT122	2	146959719	147055823	0.756652	0.0391473
cg09220244	H1FX-AS1	6068	3	129041183	16.6585	3.58483	0.00165123	0.529224	ENSG00000163913	IFT122	3	129158968	129239198	ENSMMUG00000012727	IFT122	2	146959719	147055823	0.756652	0.0391473
cg06067598	EFCAB12	17573	3	129129921	28.502	11.7846	0.0419426	0.784367	ENSG00000163913	IFT122	3	129158968	129239198	ENSMMUG00000012727	IFT122	2	146959719	147055823	0.756652	0.0391473
cg21846669	IFT122	18211	3	129200176	-14.3806	4.34318	0.0106813	0.675288	ENSG00000163913	IFT122	3	129158968	129239198	ENSMMUG00000012727	IFT122	2	146959719	147055823	0.756652	0.0391473
cg19283595	IFT122	5887	3	129206248	3.96417	1.61061	0.0392401	0.778237	ENSG00000163913	IFT122	3	129158968	129239198	ENSMMUG00000012727	IFT122	2	146959719	147055823	0.756652	0.0391473
cg25665283	RHO	3804	3	129251287	15.2613	5.62729	0.0265753	0.755991	ENSG00000163913	IFT122	3	129158968	129239198	ENSMMUG00000012727	IFT122	2	146959719	147055823	0.756652	0.0391473
cg10685436	PLXND1	50115	3	129275467	15.1432	6.30459	0.0430462	0.784367	ENSG00000163913	IFT122	3	129158968	129239198	ENSMMUG00000012727	IFT122	2	146959719	147055823	0.756652	0.0391473
cg00294776	PLXND1	43834	3	129281748	27.5087	10.1368	0.0265038	0.755991	ENSG00000163913	IFT122	3	129158968	129239198	ENSMMUG00000012727	IFT122	2	146959719	147055823	0.756652	0.0391473
cg25333181	PLXND1	34978	3	129290604	5.14581	1.98596	0.0320581	0.766793	ENSG00000163913	IFT122	3	129158968	129239198	ENSMMUG00000012727	IFT122	2	146959719	147055823	0.756652	0.0391473
cg17344223	PLXND1	29801	3	129295781	-19.9854	6.09909	0.0112416	0.680528	ENSG00000163913	IFT122	3	129158968	129239198	ENSMMUG00000012727	IFT122	2	146959719	147055823	0.756652	0.0391473
cg04372771	PLXND1	15932	3	129309650	-12.0545	4.5048	0.0281027	0.760693	ENSG00000163913	IFT122	3	129158968	129239198	ENSMMUG00000012727	IFT122	2	146959719	147055823	0.756652	0.0391473
cg12415479	PLXND1	13884	3	129311698	-8.28049	3.14803	0.0301607	0.763295	ENSG00000163913	IFT122	3	129158968	129239198	ENSMMUG00000012727	IFT122	2	146959719	147055823	0.756652	0.0391473
cg13627968	PLXND1	10406	3	129315176	-25.1948	4.88997	0.000871818	0.518918	ENSG00000163913	IFT122	3	129158968	129239198	ENSMMUG00000012727	IFT122	2	146959719	147055823	0.756652	0.0391473
cg12175038	PLXND1	9865	3	129315717	-21.8067	6.17049	0.00768664	0.642235	ENSG00000163913	IFT122	3	129158968	129239198	ENSMMUG00000012727	IFT122	2	146959719	147055823	0.756652	0.0391473
cg24770850	PLXND1	452	3	129325130	57.4881	23.2427	0.0385068	0.778237	ENSG00000163913	IFT122	3	129158968	129239198	ENSMMUG00000012727	IFT122	2	146959719	147055823	0.756652	0.0391473
cg08844900	PLXND1	1207	3	129326790	-13.1726	5.34866	0.0391481	0.778237	ENSG00000163913	IFT122	3	129158968	129239198	ENSMMUG00000012727	IFT122	2	146959719	147055823	0.756652	0.0391473
cg16665506	PLXND1	1245	3	129326828	-17.8297	7.04935	0.0352958	0.775703	ENSG00000163913	IFT122	3	129158968	129239198	ENSMMUG00000012727	IFT122	2	146959719	147055823	0.756652	0.0391473
cg24572137	PLXND1	2096	3	129327679	-14.2825	5.4149	0.0298233	0.763295	ENSG00000163913	IFT122	3	129158968	129239198	ENSMMUG00000012727	IFT122	2	146959719	147055823	0.756652	0.0391473
cg08069568	TMCC1	205851	3	129406568	-27.0221	9.85817	0.0254065	0.750401	ENSG00000163913	IFT122	3	129158968	129239198	ENSMMUG00000012727	IFT122	2	146959719	147055823	0.756652	0.0391473
cg07619697	TMCC1	205054	3	129407365	-27.9013	7.71454	0.00681503	0.63507	ENSG00000163913	IFT122	3	129158968	129239198	ENSMMUG00000012727	IFT122	2	146959719	147055823	0.756652	0.0391473
cg05711928	DNAJC13	201	3	132136352	6.57273	2.77575	0.0453943	0.786097	ENSG00000129048	ACKR4	3	132316081	132337811	ENSMMUG00000051713	ACKR4	2	34871651	34872703	-1.09659	0.00439528
cg24110099	UBA5	259	3	132379400	10.7869	4.45322	0.0417027	0.784367	ENSG00000129048	ACKR4	3	132316081	132337811	ENSMMUG00000051713	ACKR4	2	34871651	34872703	-1.09659	0.00439528
cg03249457	RYK	105303	3	133864283	-26.008	7.94908	0.0113252	0.682238	ENSG00000114019	AMOTL2	3	134074716	134094321	ENSMMUG00000021694	AMOTL2	2	36568827	36588225	0.625988	0.0290233
cg05304177	AMOTL2	11179	3	134083080	-13.3276	3.82421	0.00825794	0.650664	ENSG00000114019	AMOTL2	3	134074716	134094321	ENSMMUG00000021694	AMOTL2	2	36568827	36588225	0.625988	0.0290233
cg02751449	TRPC1	73	3	142443340	-103.718	44.6541	0.0487138	0.791209	ENSG00000188582	PAQR9	3	142668006	142682178	ENSMMUG00000003927	PAQR9	2	45080919	45085545	-1.63211	0.0239255
cg16406699	PLOD2	566	3	145803956	-7.23492	2.59158	0.0234963	0.748965	ENSG00000114698	PLSCR4	3	145910126	145968966	ENSMMUG00000007976	PLSCR4	2	48353831	48420206	0.563772	0.0243226
cg24315815	PLSCR4	612	3	145969579	-11.4888	4.78499	0.0431086	0.784628	ENSG00000114698	PLSCR4	3	145910126	145968966	ENSMMUG00000007976	PLSCR4	2	48353831	48420206	0.563772	0.0243226
cg03425695	WWTR1	85803	3	149335312	-45.8068	11.4689	0.00398289	0.578648	ENSG00000169908	TM4SF1	3	149086809	149095652	ENSMMUG00000052736	TM4SF1	2	51490503	51503158	0.588008	0.0118891
cg02273512	TIPARP-AS1	47118	3	156346384	7.60961	2.9327	0.0318772	0.766687	ENSG00000163659	TIPARP	3	156391024	156424559	ENSMMUG00000000366	TIPARP	2	58977939	59010299	0.884895	0.000384844
cg12811797	TIPARP	343	3	156392549	15.0222	6.37658	0.0462575	0.788487	ENSG00000163659	TIPARP	3	156391024	156424559	ENSMMUG00000000366	TIPARP	2	58977939	59010299	0.884895	0.000384844
cg11458158	GFM1	34866	3	158398821	-31.7471	10.6542	0.0176064	0.726332	ENSG00000118849	RARRES1	3	158414681	158450485	ENSMMUG00000014825	RARRES1	2	60947991	60983931	-1.06087	0.0146493
cg04613738	MFSD1	30616	3	158489099	21.9171	6.95282	0.0135522	0.715371	ENSG00000118849	RARRES1	3	158414681	158450485	ENSMMUG00000014825	RARRES1	2	60947991	60983931	-1.06087	0.0146493
cg16289538	MFSD1	82	3	158519633	-98.5919	33.5303	0.0186986	0.731409	ENSG00000118849	RARRES1	3	158414681	158450485	ENSMMUG00000014825	RARRES1	2	60947991	60983931	-1.06087	0.0146493
cg20089024	MFSD1	7018	3	158526734	-26.7925	7.85121	0.00918878	0.665792	ENSG00000118849	RARRES1	3	158414681	158450485	ENSMMUG00000014825	RARRES1	2	60947991	60983931	-1.06087	0.0146493
cg00701242	RTP4	150827	3	187236996	6.76204	2.85501	0.0453539	0.786097	ENSG00000113916	BCL6	3	187439165	187463515	ENSMMUG00000009198	BCL6	2	10078331	10102251	-0.537094	0.0279176
cg21705669	BCL6	9212	3	187454301	5.44812	1.91096	0.0214466	0.748965	ENSG00000113916	BCL6	3	187439165	187463515	ENSMMUG00000009198	BCL6	2	10078331	10102251	-0.537094	0.0279176
cg10091025	BCL6	9137	3	187454376	6.42397	1.90541	0.00976473	0.668824	ENSG00000113916	BCL6	3	187439165	187463515	ENSMMUG00000009198	BCL6	2	10078331	10102251	-0.537094	0.0279176
cg24266825	LPP-AS2	187265	3	187684611	6.50334	2.46798	0.0299411	0.763295	ENSG00000113916	BCL6	3	187439165	187463515	ENSMMUG00000009198	BCL6	2	10078331	10102251	-0.537094	0.0279176
cg16663209	LPP-AS2	187064	3	187684812	10.3146	3.33194	0.0147623	0.718665	ENSG00000113916	BCL6	3	187439165	187463515	ENSMMUG00000009198	BCL6	2	10078331	10102251	-0.537094	0.0279176
cg00446046	LPP-AS2	184958	3	187686918	-5.38132	1.80726	0.0176646	0.726332	ENSG00000113916	BCL6	3	187439165	187463515	ENSMMUG00000009198	BCL6	2	10078331	10102251	-0.537094	0.0279176
cg23617947	APOD	35958	3	195347035	38.1911	14.8183	0.0327541	0.769691	ENSG00000176945	MUC20	3	195447753	195467994	ENSMMUG00000008355	MUC20	2	554381	565390	-3.33115	0.0106446
cg25892137	MUC4	60137	3	195478707	-28.9817	6.38146	0.00189534	0.53185	ENSG00000176945	MUC20	3	195447753	195467994	ENSMMUG00000008355	MUC20	2	554381	565390	-3.33115	0.0106446
cg10312356	TM4SF19	6619	3	196071911	-39.6417	15.4825	0.0336252	0.769691	ENSG00000145107	TM4SF19	3	196046213	196065374	ENSMMUG00000017310	TM4SF19	2	1062001	1065674	-3.56218	0.000153515
cg15048948	UBXN7	887	3	196158458	-79.7804	33.8445	0.0461551	0.787933	ENSG00000145107	TM4SF19	3	196046213	196065374	ENSMMUG00000017310	TM4SF19	2	1062001	1065674	-3.56218	0.000153515
cg00293409	NRROS	12	3	196366669	13.4635	4.44367	0.0163137	0.721775	ENSG00000272359	U4	3	196474063	196474195	ENSMMUG00000035191	U4	2	1498537	1498650	4.15689	0.00180097
cg07277038	NRROS	6886	3	196373543	-51.0077	13.7526	0.00596542	0.617796	ENSG00000272359	U4	3	196474063	196474195	ENSMMUG00000035191	U4	2	1498537	1498650	4.15689	0.00180097
cg24242968	NRROS	20463	3	196387120	-26.9237	11.31	0.0445091	0.785524	ENSG00000272359	U4	3	196474063	196474195	ENSMMUG00000035191	U4	2	1498537	1498650	4.15689	0.00180097
cg18695263	NRROS	20848	3	196387505	-27.0557	9.93843	0.0261541	0.754901	ENSG00000272359	U4	3	196474063	196474195	ENSMMUG00000035191	U4	2	1498537	1498650	4.15689	0.00180097
cg26642703	NRROS	23269	3	196389926	-39.9682	16.4839	0.0415457	0.784367	ENSG00000272359	U4	3	196474063	196474195	ENSMMUG00000035191	U4	2	1498537	1498650	4.15689	0.00180097
cg25976489	MELTF	43990	3	196712697	-26.0807	9.48551	0.0250773	0.749804	ENSG00000272359	U4	3	196474063	196474195	ENSMMUG00000035191	U4	2	1498537	1498650	4.15689	0.00180097
cg22245752	INTS1	4457	7	1539561	-62.9714	24.3883	0.0325133	0.769691	ENSG00000225968	ELFN1	7	1727755	1787590	ENSMMUG00000003283	ELFN1	3	34789575	34827926	1.4658	0.00487623
cg26035201	PSMG3	2522	7	1607146	58.9071	23.61	0.0372304	0.777386	ENSG00000225968	ELFN1	7	1727755	1787590	ENSMMUG00000003283	ELFN1	3	34789575	34827926	1.4658	0.00487623
cg00303157	ELFN1	4800	7	1753599	16.949	3.98026	0.00276787	0.562083	ENSG00000225968	ELFN1	7	1727755	1787590	ENSMMUG00000003283	ELFN1	3	34789575	34827926	1.4658	0.00487623
cg22104371	ELFN1	38572	7	1787371	11.5689	4.26788	0.0266294	0.756142	ENSG00000225968	ELFN1	7	1727755	1787590	ENSMMUG00000003283	ELFN1	3	34789575	34827926	1.4658	0.00487623
cg16497323	WIPI2	562	7	5229273	21.5353	8.53291	0.0355981	0.775795	ENSG00000164638	SLC29A4	7	5314000	5346501	ENSMMUG00000008219	SLC29A4	3	38373474	38404264	3.24311	0.0360616
cg25901444	SLC29A4	14151	7	5336713	18.8848	4.78212	0.00424169	0.578648	ENSG00000164638	SLC29A4	7	5314000	5346501	ENSMMUG00000008219	SLC29A4	3	38373474	38404264	3.24311	0.0360616
cg01909588	SLC29A4	17619	7	5340181	-20.7859	8.02696	0.0321376	0.766793	ENSG00000164638	SLC29A4	7	5314000	5346501	ENSMMUG00000008219	SLC29A4	3	38373474	38404264	3.24311	0.0360616
cg13533403	SLC29A4	19912	7	5342474	97.5822	41.3616	0.0460125	0.787667	ENSG00000164638	SLC29A4	7	5314000	5346501	ENSMMUG00000008219	SLC29A4	3	38373474	38404264	3.24311	0.0360616
cg26312950	TNRC18	5409	7	5391498	-348.624	53.8732	0.000193912	0.459402	ENSG00000164638	SLC29A4	7	5314000	5346501	ENSMMUG00000008219	SLC29A4	3	38373474	38404264	3.24311	0.0360616
cg11415369	TNRC18	12173	7	5452872	-32.0892	10.5385	0.0159425	0.72118	ENSG00000164638	SLC29A4	7	5314000	5346501	ENSMMUG00000008219	SLC29A4	3	38373474	38404264	3.24311	0.0360616
cg00232092	FBXL18	34512	7	5518887	89.5787	37.0179	0.0418582	0.784367	ENSG00000164638	SLC29A4	7	5314000	5346501	ENSMMUG00000008219	SLC29A4	3	38373474	38404264	3.24311	0.0360616
cg04784014	FBXL18	32109	7	5521290	71.6261	25.0314	0.0211042	0.746242	ENSG00000164638	SLC29A4	7	5314000	5346501	ENSMMUG00000008219	SLC29A4	3	38373474	38404264	3.24311	0.0360616
cg11828163	FBXL18	22390	7	5531009	-22.422	4.44572	0.000997266	0.528423	ENSG00000164638	SLC29A4	7	5314000	5346501	ENSMMUG00000008219	SLC29A4	3	38373474	38404264	3.24311	0.0360616
cg07147863	FBXL18	18851	7	5534548	-28.2148	7.8036	0.00682584	0.63507	ENSG00000164638	SLC29A4	7	5314000	5346501	ENSMMUG00000008219	SLC29A4	3	38373474	38404264	3.24311	0.0360616
cg20511815	FBXL18	16363	7	5537036	-49.1564	18.8836	0.0314648	0.766557	ENSG00000164638	SLC29A4	7	5314000	5346501	ENSMMUG00000008219	SLC29A4	3	38373474	38404264	3.24311	0.0360616
cg09054743	ABCC13	32382	21	15678503	19.1235	6.0016	0.012873	0.7066	ENSG00000185272	RBM11	21	15588451	15600693	ENSMMUG00000020089	RBM11	3	32629443	32643106	0.778852	0.0395368
cg02700498	ANKMY2	776	7	16684666	201.543	61.5147	0.0112492	0.680528	ENSG00000171243	SOSTDC1	7	16501106	16570205	ENSMMUG00000016817	SOSTDC1	3	98539854	98546152	-4.03171	0.00692799
cg05042466	SKAP2	37783	7	27072642	-37.9544	6.56688	0.000414675	0.460957	ENSG00000105991	HOXA1	7	27132612	27135615	ENSMMUG00000012807	HOXA1	3	88009205	88011922	1.52273	0.0268626
cg24757553	HOXA1	8124	7	27127501	-33.2406	11.103	0.0172329	0.726332	ENSG00000105991	HOXA1	7	27132612	27135615	ENSMMUG00000012807	HOXA1	3	88009205	88011922	1.52273	0.0268626
cg12686016	HOXA1	148	7	27135477	-105.851	25.2465	0.00302666	0.56545	ENSG00000105991	HOXA1	7	27132612	27135615	ENSMMUG00000012807	HOXA1	3	88009205	88011922	1.52273	0.0268626
cg00445443	HOXA2	1083	7	27143478	39.972	14.6442	0.0258638	0.753986	ENSG00000105991	HOXA1	7	27132612	27135615	ENSMMUG00000012807	HOXA1	3	88009205	88011922	1.52273	0.0268626
cg16651126	HOXA4	152	7	27170552	-67.3389	25.1676	0.0281163	0.760693	ENSG00000105991	HOXA1	7	27132612	27135615	ENSMMUG00000012807	HOXA1	3	88009205	88011922	1.52273	0.0268626
cg20974609	HOXA5	1616	7	27181671	31.4889	11.1079	0.0219865	0.748965	ENSG00000105991	HOXA1	7	27132612	27135615	ENSMMUG00000012807	HOXA1	3	88009205	88011922	1.52273	0.0268626
cg02005600	HOXA-AS3	3702	7	27183686	74.3359	26.5861	0.0233397	0.748965	ENSG00000105991	HOXA1	7	27132612	27135615	ENSMMUG00000012807	HOXA1	3	88009205	88011922	1.52273	0.0268626
cg03529432	HOXA-AS3	719	7	27187502	22.8263	9.18076	0.0377378	0.777605	ENSG00000105991	HOXA1	7	27132612	27135615	ENSMMUG00000012807	HOXA1	3	88009205	88011922	1.52273	0.0268626
cg04073257	HOXA-AS3	3775	7	27190558	-130.256	32.9115	0.00419007	0.578648	ENSG00000105991	HOXA1	7	27132612	27135615	ENSMMUG00000012807	HOXA1	3	88009205	88011922	1.52273	0.0268626
cg08938793	HOXA10	8763	7	27211117	-66.9908	22.3653	0.0171944	0.726332	ENSG00000105991	HOXA1	7	27132612	27135615	ENSMMUG00000012807	HOXA1	3	88009205	88011922	1.52273	0.0268626
cg15381300	HOXA10	204	7	27219676	-178.028	76.8334	0.0491435	0.791209	ENSG00000105991	HOXA1	7	27132612	27135615	ENSMMUG00000012807	HOXA1	3	88009205	88011922	1.52273	0.0268626
cg09219451	HOXA11	719	7	27224123	-174.022	38.1164	0.0018365	0.529224	ENSG00000105991	HOXA1	7	27132612	27135615	ENSMMUG00000012807	HOXA1	3	88009205	88011922	1.52273	0.0268626
cg04340874	HOXA11-AS	783	7	27225811	-17.1325	6.5409	0.0306846	0.766006	ENSG00000105991	HOXA1	7	27132612	27135615	ENSMMUG00000012807	HOXA1	3	88009205	88011922	1.52273	0.0268626
cg20994254	HOXA11-AS	2312	7	27227340	-78.0807	24.7248	0.0134355	0.715371	ENSG00000105991	HOXA1	7	27132612	27135615	ENSMMUG00000012807	HOXA1	3	88009205	88011922	1.52273	0.0268626
cg20222611	HOXA13	3734	7	27235991	-139.604	39.4602	0.00764374	0.642235	ENSG00000105991	HOXA1	7	27132612	27135615	ENSMMUG00000012807	HOXA1	3	88009205	88011922	1.52273	0.0268626
cg10215104	HOXA13	99	7	27239825	-221.444	91.4433	0.041742	0.784367	ENSG00000105991	HOXA1	7	27132612	27135615	ENSMMUG00000012807	HOXA1	3	88009205	88011922	1.52273	0.0268626
cg04099095	EVX1	3594	7	27278570	-13.4313	5.67617	0.0455119	0.786097	ENSG00000105991	HOXA1	7	27132612	27135615	ENSMMUG00000012807	HOXA1	3	88009205	88011922	1.52273	0.0268626
cg15646544	BACE2	52140	21	42591869	13.7349	4.95714	0.024269	0.748965	ENSG00000183486	MX2	21	42733870	42781317	ENSMMUG00000044257	MX2	3	5231302	5275349	1.02943	0.0199825
cg13507964	MX1	182	21	42792703	-9.22917	3.59512	0.0332753	0.769691	ENSG00000183486	MX2	21	42733870	42781317	ENSMMUG00000044257	MX2	3	5231302	5275349	1.02943	0.0199825
cg06722792	PDE9A	56	21	44073919	103.446	42.5761	0.0412233	0.784367	ENSG00000160191	PDE9A	21	44073746	44195619	ENSMMUG00000022107	PDE9A	3	3883892	4009196	0.943987	0.0311351
cg01828416	PDE9A	38332	21	44112195	7.90034	2.97909	0.0291684	0.762326	ENSG00000160191	PDE9A	21	44073746	44195619	ENSMMUG00000022107	PDE9A	3	3883892	4009196	0.943987	0.0311351
cg11364253	PDE9A	16880	21	44180555	21.1309	7.99694	0.0296039	0.763295	ENSG00000160191	PDE9A	21	44073746	44195619	ENSMMUG00000022107	PDE9A	3	3883892	4009196	0.943987	0.0311351
cg23447512	LINC00205	18946	21	46726928	3.47387	1.4694	0.0456619	0.786097	ENSG00000182871	COL18A1	21	46825052	46933634	ENSMMUG00000004472	COL18A1	3	1234727	1339081	0.557545	0.0394774
cg17606406	SLC19A1	37970	21	47002296	6.1377	2.32143	0.0295325	0.763295	ENSG00000182871	COL18A1	21	46825052	46933634	ENSMMUG00000004472	COL18A1	3	1234727	1339081	0.557545	0.0394774
cg05327417	BAZ1B	316	7	72936932	-231.009	58.9009	0.00440601	0.578648	ENSG00000009950	MLXIPL	7	73007524	73038873	ENSMMUG00000030377	MLXIPL	3	45939209	45976544	-3.42768	0.0166946
cg10145161	BCL7B	13628	7	72958437	141.138	59.9284	0.0463105	0.788487	ENSG00000009950	MLXIPL	7	73007524	73038873	ENSMMUG00000030377	MLXIPL	3	45939209	45976544	-3.42768	0.0166946
cg18274279	ABHD11	438	7	73153629	-22.4116	6.96243	0.0122588	0.692475	ENSG00000009950	MLXIPL	7	73007524	73038873	ENSMMUG00000030377	MLXIPL	3	45939209	45976544	-3.42768	0.0166946
cg23479697	METTL27	35	7	73256820	214.226	40.7083	0.00076222	0.512681	ENSG00000009950	MLXIPL	7	73007524	73038873	ENSMMUG00000030377	MLXIPL	3	45939209	45976544	-3.42768	0.0166946
cg23350327	TMEM270	38667	7	73314157	-17.2991	7.43899	0.0485038	0.791209	ENSG00000165215	CLDN3	7	73183328	73184600	ENSMMUG00000001143	CLDN3	3	46127776	46129054	0.936853	0.0236353
cg19736397	YWHAG	40443	7	75947899	-12.0531	4.64359	0.0318331	0.766687	ENSG00000106211	HSPB1	7	75931861	75933612	ENSMMUG00000056744	HSPB1	3	44913041	44916634	0.547171	0.00857117
cg03707599	YWHAG	31411	7	75956931	-13.1871	4.5335	0.0196246	0.739266	ENSG00000106211	HSPB1	7	75931861	75933612	ENSMMUG00000056744	HSPB1	3	44913041	44916634	0.547171	0.00857117
cg26277398	YWHAG	29474	7	75958868	-12.9739	5.61807	0.049742	0.791678	ENSG00000106211	HSPB1	7	75931861	75933612	ENSMMUG00000056744	HSPB1	3	44913041	44916634	0.547171	0.00857117
cg02752243	DTX2P1-UPK3BP1-PMS2P11	104	7	76610035	-106.137	37.5242	0.0222014	0.748965	ENSG00000127951	FGL2	7	76822688	76829143	ENSMMUG00000055568	FGL2	3	129058985	129065621	0.566963	0.0498444
cg23285573	PON2	210	7	95064174	-18.4606	4.85718	0.00523158	0.598689	ENSG00000004799	PDK4	7	95212811	95225803	ENSMMUG00000021389	PDK4	3	110534288	110547499	-0.386904	0.00917788
cg22171829	PDK4	405	7	95225520	8.64741	2.01769	0.00266648	0.562083	ENSG00000004799	PDK4	7	95212811	95225803	ENSMMUG00000021389	PDK4	3	110534288	110547499	-0.386904	0.00917788
cg17889682	DYNC1I1	914	7	95402733	-3.92254	1.41161	0.0239703	0.748965	ENSG00000004799	PDK4	7	95212811	95225803	ENSMMUG00000021389	PDK4	3	110534288	110547499	-0.386904	0.00917788
cg20468314	ZKSCAN5	1073	7	99101200	38.0524	10.2737	0.00600924	0.617796	ENSG00000160870	CYP3A7	7	99302660	99332819	ENSMMUG00000022730	CYP3A5	3	41759901	41962392	1.19127	0.0387426
cg20323725	ZKSCAN5	1071	7	99101202	46.1296	17.1607	0.0275777	0.760693	ENSG00000160870	CYP3A7	7	99302660	99332819	ENSMMUG00000022730	CYP3A5	3	41759901	41962392	1.19127	0.0387426
cg19462228	ZKSCAN5	923	7	99103801	68.4337	27.7348	0.0388661	0.778237	ENSG00000160870	CYP3A7	7	99302660	99332819	ENSMMUG00000022730	CYP3A5	3	41759901	41962392	1.19127	0.0387426
cg22813369	ZNF655	98	7	99156144	24.1065	6.83453	0.00776422	0.642235	ENSG00000160870	CYP3A7	7	99302660	99332819	ENSMMUG00000022730	CYP3A5	3	41759901	41962392	1.19127	0.0387426
cg19728601	GJC3	294	7	99526949	-29.3452	11.4332	0.0332995	0.769691	ENSG00000160870	CYP3A7	7	99302660	99332819	ENSMMUG00000022730	CYP3A5	3	41759901	41962392	1.19127	0.0387426
cg22056759	TSC22D4	61	7	100076964	-41.3492	16.0471	0.0327823	0.769691	ENSG00000106351	AGFG2	7	100136834	100165842	ENSMMUG00000048302	AGFG2	3	42619705	42646891	-0.549223	0.0157764
cg00668103	NYAP1	3179	7	100084730	7.80896	2.68852	0.0197531	0.739266	ENSG00000106351	AGFG2	7	100136834	100165842	ENSMMUG00000048302	AGFG2	3	42619705	42646891	-0.549223	0.0157764
cg04458032	AGFG2	648	7	100136186	-61.5352	24.8313	0.0382231	0.777605	ENSG00000106351	AGFG2	7	100136834	100165842	ENSMMUG00000048302	AGFG2	3	42619705	42646891	-0.549223	0.0157764
cg03364193	AGFG2	30729	7	100167564	3.70278	1.42501	0.0316953	0.766687	ENSG00000106351	AGFG2	7	100136834	100165842	ENSMMUG00000048302	AGFG2	3	42619705	42646891	-0.549223	0.0157764
cg24461254	LRCH4	10993	7	100172783	18.5383	7.55246	0.0396506	0.778237	ENSG00000106351	AGFG2	7	100136834	100165842	ENSMMUG00000048302	AGFG2	3	42619705	42646891	-0.549223	0.0157764
cg17398057	TFR2	20689	7	100218512	10.1142	3.67851	0.0250766	0.749804	ENSG00000106351	AGFG2	7	100136834	100165842	ENSMMUG00000048302	AGFG2	3	42619705	42646891	-0.549223	0.0157764
cg20262911	GIGYF1	1008	7	100285862	23.789	4.59013	0.000840041	0.512681	ENSG00000106351	AGFG2	7	100136834	100165842	ENSMMUG00000048302	AGFG2	3	42619705	42646891	-0.549223	0.0157764
cg21719787	POP7	448	7	100303228	-20.4258	7.742	0.0297913	0.763295	ENSG00000106351	AGFG2	7	100136834	100165842	ENSMMUG00000048302	AGFG2	3	42619705	42646891	-0.549223	0.0157764
cg01692340	EPO	104	7	100318319	14.5178	5.76821	0.0359845	0.777345	ENSG00000106351	AGFG2	7	100136834	100165842	ENSMMUG00000048302	AGFG2	3	42619705	42646891	-0.549223	0.0157764
cg00854166	EPO	294	7	100318718	-15.1984	5.14614	0.0183316	0.726332	ENSG00000106351	AGFG2	7	100136834	100165842	ENSMMUG00000048302	AGFG2	3	42619705	42646891	-0.549223	0.0157764
cg20688289	MUC12	39	7	100612865	-34.3959	7.18728	0.00138063	0.528423	ENSG00000106397	PLOD3	7	100849258	100861701	ENSMMUG00000006949	PLOD3	3	43337777	43350446	0.858252	0.00641119
cg16706840	MUC12	42684	7	100655589	-10.9842	3.92668	0.0232935	0.748965	ENSG00000106397	PLOD3	7	100849258	100861701	ENSMMUG00000006949	PLOD3	3	43337777	43350446	0.858252	0.00641119
cg21922206	SERPINE1	4406	7	100765964	-7.78179	3.03878	0.0336036	0.769691	ENSG00000106397	PLOD3	7	100849258	100861701	ENSMMUG00000006949	PLOD3	3	43337777	43350446	0.858252	0.00641119
cg25826546	SERPINE1	310	7	100770060	-11.6594	2.7702	0.00296051	0.56545	ENSG00000106397	PLOD3	7	100849258	100861701	ENSMMUG00000006949	PLOD3	3	43337777	43350446	0.858252	0.00641119
cg20438404	SERPINE1	178	7	100770192	-10.914	3.46451	0.0135938	0.715371	ENSG00000106397	PLOD3	7	100849258	100861701	ENSMMUG00000006949	PLOD3	3	43337777	43350446	0.858252	0.00641119
cg08506775	SERPINE1	84	7	100770286	56.6537	21.4211	0.0294946	0.763295	ENSG00000106397	PLOD3	7	100849258	100861701	ENSMMUG00000006949	PLOD3	3	43337777	43350446	0.858252	0.00641119
cg02273392	SERPINE1	43	7	100770414	-8.64204	2.42151	0.00730581	0.638537	ENSG00000106397	PLOD3	7	100849258	100861701	ENSMMUG00000006949	PLOD3	3	43337777	43350446	0.858252	0.00641119
cg15874872	SERPINE1	63	7	100770434	-9.32794	1.71982	0.000627957	0.47671	ENSG00000106397	PLOD3	7	100849258	100861701	ENSMMUG00000006949	PLOD3	3	43337777	43350446	0.858252	0.00641119
cg01708552	NAT16	8072	7	100815485	-20.7857	7.53639	0.0247495	0.748965	ENSG00000106397	PLOD3	7	100849258	100861701	ENSMMUG00000006949	PLOD3	3	43337777	43350446	0.858252	0.00641119
cg17868694	MOGAT3	2769	7	100841533	-7.81255	2.49859	0.0140835	0.717622	ENSG00000106397	PLOD3	7	100849258	100861701	ENSMMUG00000006949	PLOD3	3	43337777	43350446	0.858252	0.00641119
cg10333402	MOGAT3	1344	7	100845647	-33.4365	13.4633	0.0379025	0.777605	ENSG00000106397	PLOD3	7	100849258	100861701	ENSMMUG00000006949	PLOD3	3	43337777	43350446	0.858252	0.00641119
cg19873785	ZNHIT1	267	7	100861253	-30.584	11.7595	0.0315794	0.766557	ENSG00000106397	PLOD3	7	100849258	100861701	ENSMMUG00000006949	PLOD3	3	43337777	43350446	0.858252	0.00641119
cg12625296	ZNHIT1	387	7	100861373	48.1861	17.418	0.0244299	0.748965	ENSG00000106397	PLOD3	7	100849258	100861701	ENSMMUG00000006949	PLOD3	3	43337777	43350446	0.858252	0.00641119
cg08948042	ZNHIT1	2230	7	100863216	41.9888	15.8664	0.0294201	0.763295	ENSG00000106397	PLOD3	7	100849258	100861701	ENSMMUG00000006949	PLOD3	3	43337777	43350446	0.858252	0.00641119
cg25967897	ZNHIT1	5011	7	100865997	51.4404	21.0439	0.040285	0.780753	ENSG00000106397	PLOD3	7	100849258	100861701	ENSMMUG00000006949	PLOD3	3	43337777	43350446	0.858252	0.00641119
cg08064378	CLDN15	7706	7	100874395	39.8128	13.6841	0.0196063	0.739266	ENSG00000106397	PLOD3	7	100849258	100861701	ENSMMUG00000006949	PLOD3	3	43337777	43350446	0.858252	0.00641119
cg06686383	FAM185A	1110	7	102390529	-36.9127	12.7785	0.0202412	0.739569	ENSG00000128606	LRRC17	7	102553438	102585396	ENSMMUG00000012432	LRRC17	3	129320279	129352998	4.8974	0.00227224
cg14609556	FBXL13	46130	7	102669158	62.5546	24.5802	0.034446	0.773415	ENSG00000128606	LRRC17	7	102553438	102585396	ENSMMUG00000012432	LRRC17	3	129320279	129352998	4.8974	0.00227224
cg03891747	FBXL13	46113	7	102669175	132.812	47.7149	0.0237975	0.748965	ENSG00000128606	LRRC17	7	102553438	102585396	ENSMMUG00000012432	LRRC17	3	129320279	129352998	4.8974	0.00227224
cg23842706	FBXL13	13217	7	102702071	44.0866	17.6363	0.0369557	0.777345	ENSG00000128606	LRRC17	7	102553438	102585396	ENSMMUG00000012432	LRRC17	3	129320279	129352998	4.8974	0.00227224
cg09739907	NAPEPLD	173	7	102789396	227.213	72.7062	0.0141197	0.717622	ENSG00000128606	LRRC17	7	102553438	102585396	ENSMMUG00000012432	LRRC17	3	129320279	129352998	4.8974	0.00227224
cg27085072	FBXL13	93000	7	102622288	6.39522	1.3495	0.00146595	0.528423	ENSG00000170632	ARMC10	7	102715328	102740205	ENSMMUG00000012435	ARMC10	3	129490116	129515252	0.447888	0.0167444
cg23842706	FBXL13	13217	7	102702071	6.96185	2.64845	0.0302414	0.763295	ENSG00000170632	ARMC10	7	102715328	102740205	ENSMMUG00000012435	ARMC10	3	129490116	129515252	0.447888	0.0167444
cg12234576	PMPCB	22353	7	102960257	44.3158	14.7173	0.0167847	0.72407	ENSG00000170632	ARMC10	7	102715328	102740205	ENSMMUG00000012435	ARMC10	3	129490116	129515252	0.447888	0.0167444
cg04931708	FEZF1-AS1	965	7	121944678	-64.9138	22.3443	0.0197348	0.739266	ENSG00000008311	AASS	7	121715701	121784334	ENSMMUG00000044304	AASS	3	148484149	148545177	-1.16932	0.000856457
cg02644510	FEZF1-AS1	2895	7	121946608	-14.7912	6.00316	0.0390803	0.778237	ENSG00000008311	AASS	7	121715701	121784334	ENSMMUG00000044304	AASS	3	148484149	148545177	-1.16932	0.000856457
cg13064050	GPR37	133	7	124406213	69.853	22.4962	0.0145528	0.718665	ENSG00000170775	GPR37	7	124386051	124405681	ENSMMUG00000010664	GPR37	3	151129504	151150007	-0.792902	0.00357047
cg27229586	LINC01000	18716	7	128300012	7.72798	2.28571	0.00962729	0.668439	ENSG00000128591	FLNC	7	128470431	128499328	ENSMMUG00000006296	FLNC	3	155079379	155107429	-0.78655	0.0272792
cg10290200	FLNC	10811	7	128481295	40.0893	14.0295	0.0212327	0.746612	ENSG00000128591	FLNC	7	128470431	128499328	ENSMMUG00000006296	FLNC	3	155079379	155107429	-0.78655	0.0272792
cg13951589	FLNC	11803	7	128482287	17.0521	3.96083	0.00259751	0.562083	ENSG00000128591	FLNC	7	128470431	128499328	ENSMMUG00000006296	FLNC	3	155079379	155107429	-0.78655	0.0272792
cg15031685	FLNC	23576	7	128494060	38.2217	9.69473	0.00428067	0.578648	ENSG00000128591	FLNC	7	128470431	128499328	ENSMMUG00000006296	FLNC	3	155079379	155107429	-0.78655	0.0272792
cg14678430	FLNC	23666	7	128494150	55.5345	14.4754	0.00497198	0.593109	ENSG00000128591	FLNC	7	128470431	128499328	ENSMMUG00000006296	FLNC	3	155079379	155107429	-0.78655	0.0272792
cg03379100	FLNC	23741	7	128494225	16.3351	3.69589	0.00222708	0.551421	ENSG00000128591	FLNC	7	128470431	128499328	ENSMMUG00000006296	FLNC	3	155079379	155107429	-0.78655	0.0272792
cg18549575	FLNC	24084	7	128494568	47.2953	15.7125	0.0168124	0.72407	ENSG00000128591	FLNC	7	128470431	128499328	ENSMMUG00000006296	FLNC	3	155079379	155107429	-0.78655	0.0272792
cg15664644	KCP	18123	7	128502854	-16.4395	5.36562	0.0154918	0.719588	ENSG00000128591	FLNC	7	128470431	128499328	ENSMMUG00000006296	FLNC	3	155079379	155107429	-0.78655	0.0272792
cg20841427	SMKR1	24585	7	129166906	-24.0494	9.81455	0.0399129	0.779136	ENSG00000128578	STRIP2	7	129074274	129128240	ENSMMUG00000019359	STRIP2	3	155692383	155752751	1.48204	0.00377307
cg04438035	NRF1	145	7	129270065	-21.3329	7.15191	0.0175247	0.726332	ENSG00000128578	STRIP2	7	129074274	129128240	ENSMMUG00000019359	STRIP2	3	155692383	155752751	1.48204	0.00377307
cg21025171	CHCHD3	225490	7	132541338	-11.0096	4.42818	0.0377414	0.777605	ENSG00000106554	CHCHD3	7	132469629	132766848	ENSMMUG00000001671	CHCHD3	3	159098377	159392181	-0.418677	0.0305799
cg24550369	PRSS3P2	8831	7	142487589	-6.54985	2.78358	0.0464613	0.788487	ENSG00000106123	EPHB6	7	142552792	142568847	ENSMMUG00000016218	EPHB6	3	169442268	169454855	-0.818316	0.00163121
cg02745912	PRSS3P2	15446	7	142494204	5.78345	2.22397	0.031593	0.766557	ENSG00000106123	EPHB6	7	142552792	142568847	ENSMMUG00000016218	EPHB6	3	169442268	169454855	-0.818316	0.00163121
cg25320562	KMT2C	17	7	152133073	-251.307	58.539	0.00264066	0.562083	ENSG00000196584	XRCC2	7	152341864	152373250	ENSMMUG00000002878	XRCC2	3	178635514	178668474	-0.714739	0.0113879
cg25944479	EEF1E1	92233	6	8195062	2.50604	0.931808	0.0275207	0.760693	ENSG00000124786	SLC35B3	6	8413301	8435794	ENSMMUG00000010672	SLC35B3	4	161618495	161643148	-0.315719	0.0407612
cg10497162	ZKSCAN8	64	6	28109624	-21.5238	8.80886	0.0403482	0.78099	ENSG00000235109	ZSCAN31	6	28292470	28324048	ENSMMUG00000007231	ZSCAN31	4	141894131	141934035	-0.815426	0.0324976
cg20164279	ZSCAN31	6634	6	28317414	58.6078	23.573	0.0377438	0.777605	ENSG00000235109	ZSCAN31	6	28292470	28324048	ENSMMUG00000007231	ZSCAN31	4	141894131	141934035	-0.815426	0.0324976
cg10788466	GPX5	1496	6	28497605	10.4627	2.21738	0.00150511	0.528423	ENSG00000235109	ZSCAN31	6	28292470	28324048	ENSMMUG00000007231	ZSCAN31	4	141894131	141934035	-0.815426	0.0324976
cg18710738	ZKSCAN3	6958	6	28324650	-57.7057	23.7483	0.0412097	0.784367	ENSG00000224586	GPX5	6	28493702	28502729	ENSMMUG00000004618	GPX5	4	141704593	141713625	3.87315	0.000952441
cg00909958	GPX5	1169	6	28497278	-48.5504	15.5904	0.0143557	0.718456	ENSG00000224586	GPX5	6	28493702	28502729	ENSMMUG00000004618	GPX5	4	141704593	141713625	3.87315	0.000952441
cg10788466	GPX5	1496	6	28497605	-35.5444	12.8794	0.0246828	0.748965	ENSG00000224586	GPX5	6	28493702	28502729	ENSMMUG00000004618	GPX5	4	141704593	141713625	3.87315	0.000952441
cg20897936	ZBED9	371	6	28554741	222.817	51.9426	0.00265249	0.562083	ENSG00000224586	GPX5	6	28493702	28502729	ENSMMUG00000004618	GPX5	4	141704593	141713625	3.87315	0.000952441
cg05301470	ZBED9	2893	6	28558006	-27.0756	11.3456	0.0441003	0.785524	ENSG00000224586	GPX5	6	28493702	28502729	ENSMMUG00000004618	GPX5	4	141704593	141713625	3.87315	0.000952441
cg11221922	ZBED9	123278	6	28678391	-79.7456	28.909	0.0247318	0.748965	ENSG00000224586	GPX5	6	28493702	28502729	ENSMMUG00000004618	GPX5	4	141704593	141713625	3.87315	0.000952441
cg03126547	HLA-E	25401	6	30431782	4.18163	1.79487	0.0481797	0.791209	ENSG00000146112	PPP1R18	6	30644166	30655672	ENSMMUG00000019961	PPP1R18	4	139226201	139238480	0.749466	0.00595404
cg00012701	HLA-E	22845	6	30434338	9.607	3.68285	0.0311991	0.766557	ENSG00000146112	PPP1R18	6	30644166	30655672	ENSMMUG00000019961	PPP1R18	4	139226201	139238480	0.749466	0.00595404
cg18575313	HLA-E	7669	6	30449514	-6.96068	1.40938	0.00113677	0.528423	ENSG00000146112	PPP1R18	6	30644166	30655672	ENSMMUG00000019961	PPP1R18	4	139226201	139238480	0.749466	0.00595404
cg09609649	HLA-E	770	6	30458060	4.60856	1.888	0.0405028	0.781174	ENSG00000146112	PPP1R18	6	30644166	30655672	ENSMMUG00000019961	PPP1R18	4	139226201	139238480	0.749466	0.00595404
cg05201185	HLA-E	1849	6	30459139	-16.2873	6.56246	0.0379999	0.777605	ENSG00000146112	PPP1R18	6	30644166	30655672	ENSMMUG00000019961	PPP1R18	4	139226201	139238480	0.749466	0.00595404
cg10996111	GNL1	14912	6	30510459	17.4429	6.29467	0.0242568	0.748965	ENSG00000146112	PPP1R18	6	30644166	30655672	ENSMMUG00000019961	PPP1R18	4	139226201	139238480	0.749466	0.00595404
cg23940467	GNL1	1571	6	30523800	29.8218	11.3346	0.0301298	0.763295	ENSG00000146112	PPP1R18	6	30644166	30655672	ENSMMUG00000019961	PPP1R18	4	139226201	139238480	0.749466	0.00595404
cg18976822	PRR3	310	6	30524797	142.019	55.4097	0.0334862	0.769691	ENSG00000146112	PPP1R18	6	30644166	30655672	ENSMMUG00000019961	PPP1R18	4	139226201	139238480	0.749466	0.00595404
cg26749853	PPP1R10	16381	6	30568703	-25.5764	9.58828	0.028474	0.760693	ENSG00000146112	PPP1R18	6	30644166	30655672	ENSMMUG00000019961	PPP1R18	4	139226201	139238480	0.749466	0.00595404
cg19200440	PPP1R10	15928	6	30569156	-39.0345	12.4161	0.0137252	0.715371	ENSG00000146112	PPP1R18	6	30644166	30655672	ENSMMUG00000019961	PPP1R18	4	139226201	139238480	0.749466	0.00595404
cg16410241	PPP1R10	883	6	30584201	90.1675	20.8246	0.0025125	0.562083	ENSG00000146112	PPP1R18	6	30644166	30655672	ENSMMUG00000019961	PPP1R18	4	139226201	139238480	0.749466	0.00595404
cg18298197	MRPS18B	7827	6	30593314	16.2927	3.43376	0.00145483	0.528423	ENSG00000146112	PPP1R18	6	30644166	30655672	ENSMMUG00000019961	PPP1R18	4	139226201	139238480	0.749466	0.00595404
cg21908996	ATAT1	17493	6	30612157	-57.3805	17.9569	0.0126988	0.7066	ENSG00000146112	PPP1R18	6	30644166	30655672	ENSMMUG00000019961	PPP1R18	4	139226201	139238480	0.749466	0.00595404
cg13011452	ATAT1	19718	6	30614382	9.79901	3.17755	0.0150294	0.719588	ENSG00000146112	PPP1R18	6	30644166	30655672	ENSMMUG00000019961	PPP1R18	4	139226201	139238480	0.749466	0.00595404
cg21291449	ATAT1	19736	6	30614400	5.76376	2.2322	0.0325097	0.769691	ENSG00000146112	PPP1R18	6	30644166	30655672	ENSMMUG00000019961	PPP1R18	4	139226201	139238480	0.749466	0.00595404
cg04350136	C6orf136	1288	6	30616105	6.36337	1.32958	0.00138004	0.528423	ENSG00000146112	PPP1R18	6	30644166	30655672	ENSMMUG00000019961	PPP1R18	4	139226201	139238480	0.749466	0.00595404
cg15663618	DHX16	10075	6	30630755	-29.3167	10.0634	0.0194934	0.739266	ENSG00000146112	PPP1R18	6	30644166	30655672	ENSMMUG00000019961	PPP1R18	4	139226201	139238480	0.749466	0.00595404
cg11554650	PPP1R18	2481	6	30653191	44.0405	17.3909	0.0351245	0.775703	ENSG00000146112	PPP1R18	6	30644166	30655672	ENSMMUG00000019961	PPP1R18	4	139226201	139238480	0.749466	0.00595404
cg13040816	MDC1	3912	6	30681089	37.1516	13.3415	0.023753	0.748965	ENSG00000146112	PPP1R18	6	30644166	30655672	ENSMMUG00000019961	PPP1R18	4	139226201	139238480	0.749466	0.00595404
cg20835659	MDC1	3329	6	30681672	-11.6214	2.61055	0.00213438	0.551421	ENSG00000146112	PPP1R18	6	30644166	30655672	ENSMMUG00000019961	PPP1R18	4	139226201	139238480	0.749466	0.00595404
cg03844211	MDC1	228	6	30684773	-66.6602	24.851	0.0278225	0.760693	ENSG00000146112	PPP1R18	6	30644166	30655672	ENSMMUG00000019961	PPP1R18	4	139226201	139238480	0.749466	0.00595404
cg16254746	FLOT1	11610	6	30698843	-5.75009	2.24353	0.0334919	0.769691	ENSG00000146112	PPP1R18	6	30644166	30655672	ENSMMUG00000019961	PPP1R18	4	139226201	139238480	0.749466	0.00595404
cg17840178	FLOT1	650	6	30709803	-22.4063	9.58172	0.0475313	0.791209	ENSG00000146112	PPP1R18	6	30644166	30655672	ENSMMUG00000019961	PPP1R18	4	139226201	139238480	0.749466	0.00595404
cg14433074	IER3	1237	6	30711090	10.5404	3.74631	0.0227187	0.748965	ENSG00000146112	PPP1R18	6	30644166	30655672	ENSMMUG00000019961	PPP1R18	4	139226201	139238480	0.749466	0.00595404
cg19033654	IER3	1189	6	30711138	-6.6557	2.31334	0.0206034	0.741367	ENSG00000146112	PPP1R18	6	30644166	30655672	ENSMMUG00000019961	PPP1R18	4	139226201	139238480	0.749466	0.00595404
cg09235583	IER3	1186	6	30711141	-51.3046	22.1785	0.049437	0.791209	ENSG00000146112	PPP1R18	6	30644166	30655672	ENSMMUG00000019961	PPP1R18	4	139226201	139238480	0.749466	0.00595404
cg08457178	IER3	691	6	30711636	-11.6253	4.28222	0.026461	0.755991	ENSG00000146112	PPP1R18	6	30644166	30655672	ENSMMUG00000019961	PPP1R18	4	139226201	139238480	0.749466	0.00595404
cg17389738	IER3	685	6	30711642	-12.4812	4.54994	0.0253255	0.750401	ENSG00000146112	PPP1R18	6	30644166	30655672	ENSMMUG00000019961	PPP1R18	4	139226201	139238480	0.749466	0.00595404
cg20178172	IER3	672	6	30711655	-8.12958	3.04445	0.0283493	0.760693	ENSG00000146112	PPP1R18	6	30644166	30655672	ENSMMUG00000019961	PPP1R18	4	139226201	139238480	0.749466	0.00595404
cg08384314	IER3	647	6	30711680	-9.01889	2.68315	0.0099126	0.668824	ENSG00000146112	PPP1R18	6	30644166	30655672	ENSMMUG00000019961	PPP1R18	4	139226201	139238480	0.749466	0.00595404
cg22697420	IER3	37283	6	30749611	23.3997	7.53471	0.0145423	0.718665	ENSG00000146112	PPP1R18	6	30644166	30655672	ENSMMUG00000019961	PPP1R18	4	139226201	139238480	0.749466	0.00595404
cg24433124	IER3	43640	6	30755968	-6.86298	2.18948	0.0139199	0.717622	ENSG00000146112	PPP1R18	6	30644166	30655672	ENSMMUG00000019961	PPP1R18	4	139226201	139238480	0.749466	0.00595404
cg24727290	DDR1	173	6	30850868	-10.5327	2.70419	0.00457711	0.57965	ENSG00000146112	PPP1R18	6	30644166	30655672	ENSMMUG00000019961	PPP1R18	4	139226201	139238480	0.749466	0.00595404
cg13329862	DDR1	181	6	30850876	-8.47917	2.40158	0.00772454	0.642235	ENSG00000146112	PPP1R18	6	30644166	30655672	ENSMMUG00000019961	PPP1R18	4	139226201	139238480	0.749466	0.00595404
cg19215110	DDR1	218	6	30850913	-13.4822	3.77884	0.00731703	0.638537	ENSG00000146112	PPP1R18	6	30644166	30655672	ENSMMUG00000019961	PPP1R18	4	139226201	139238480	0.749466	0.00595404
cg13351860	DDR1	219	6	30856386	-12.4203	4.57803	0.0265333	0.755991	ENSG00000146112	PPP1R18	6	30644166	30655672	ENSMMUG00000019961	PPP1R18	4	139226201	139238480	0.749466	0.00595404
cg23222808	DDR1	1855	6	30858321	-12.3065	2.47177	0.00108108	0.528423	ENSG00000146112	PPP1R18	6	30644166	30655672	ENSMMUG00000019961	PPP1R18	4	139226201	139238480	0.749466	0.00595404
cg23562526	DDR1	2359	6	30858825	-16.7891	4.00282	0.00301989	0.56545	ENSG00000146112	PPP1R18	6	30644166	30655672	ENSMMUG00000019961	PPP1R18	4	139226201	139238480	0.749466	0.00595404
cg20335906	DDR1	819	6	30859977	-51.4662	14.9377	0.00875395	0.65716	ENSG00000146112	PPP1R18	6	30644166	30655672	ENSMMUG00000019961	PPP1R18	4	139226201	139238480	0.749466	0.00595404
cg12669395	DDR1	1708	6	30860866	-7.38397	3.05335	0.04196	0.784367	ENSG00000146112	PPP1R18	6	30644166	30655672	ENSMMUG00000019961	PPP1R18	4	139226201	139238480	0.749466	0.00595404
cg13799856	DDR1	3313	6	30862471	-19.0186	2.03552	1.40607e-05	0.289485	ENSG00000146112	PPP1R18	6	30644166	30655672	ENSMMUG00000019961	PPP1R18	4	139226201	139238480	0.749466	0.00595404
cg14790552	DDR1	10533	6	30866999	-17.1752	4.50413	0.00513909	0.598689	ENSG00000146112	PPP1R18	6	30644166	30655672	ENSMMUG00000019961	PPP1R18	4	139226201	139238480	0.749466	0.00595404
cg27122065	GTF2H4	3822	6	30879800	-12.1699	4.66614	0.0312214	0.766557	ENSG00000146112	PPP1R18	6	30644166	30655672	ENSMMUG00000019961	PPP1R18	4	139226201	139238480	0.749466	0.00595404
cg19132733	GTF2H4	3825	6	30879803	15.4975	4.43924	0.0081862	0.650664	ENSG00000146112	PPP1R18	6	30644166	30655672	ENSMMUG00000019961	PPP1R18	4	139226201	139238480	0.749466	0.00595404
cg19725862	GTF2H4	4210	6	30880188	-15.9828	5.70202	0.0230907	0.748965	ENSG00000146112	PPP1R18	6	30644166	30655672	ENSMMUG00000019961	PPP1R18	4	139226201	139238480	0.749466	0.00595404
cg19104656	VARS2	104	6	30882087	5.44145	1.93387	0.0227112	0.748965	ENSG00000146112	PPP1R18	6	30644166	30655672	ENSMMUG00000019961	PPP1R18	4	139226201	139238480	0.749466	0.00595404
cg22809408	HCP5	21257	6	31409700	9.99356	4.04244	0.0385802	0.778237	ENSG00000204438	GPANK1	6	31629006	31634060	ENSMMUG00000005293	GPANK1	4	137838713	137843954	-0.399022	0.0191241
cg16444909	ATP6V1G2	1396	6	31513229	-2.51345	0.910168	0.0246168	0.748965	ENSG00000204438	GPANK1	6	31629006	31634060	ENSMMUG00000005293	GPANK1	4	137838713	137843954	-0.399022	0.0191241
cg16224951	NFKBIL1	13525	6	31528154	2.79702	1.17721	0.0448262	0.785524	ENSG00000204438	GPANK1	6	31629006	31634060	ENSMMUG00000005293	GPANK1	4	137838713	137843954	-0.399022	0.0191241
cg21240855	LTA	755	6	31541461	-9.61826	2.79016	0.00873065	0.65716	ENSG00000204438	GPANK1	6	31629006	31634060	ENSMMUG00000005293	GPANK1	4	137838713	137843954	-0.399022	0.0191241
cg13335388	LTB	38	6	31550241	-6.08789	2.52512	0.0424465	0.784367	ENSG00000204438	GPANK1	6	31629006	31634060	ENSMMUG00000005293	GPANK1	4	137838713	137843954	-0.399022	0.0191241
cg04836028	LST1	306	6	31554263	-4.26703	1.45371	0.0188459	0.731572	ENSG00000204438	GPANK1	6	31629006	31634060	ENSMMUG00000005293	GPANK1	4	137838713	137843954	-0.399022	0.0191241
cg15574924	PRRC2A	244	6	31588206	10.2432	3.17008	0.0120353	0.690983	ENSG00000204438	GPANK1	6	31629006	31634060	ENSMMUG00000005293	GPANK1	4	137838713	137843954	-0.399022	0.0191241
cg16932560	PRRC2A	1543	6	31589994	-6.43943	1.47325	0.00237765	0.55626	ENSG00000204438	GPANK1	6	31629006	31634060	ENSMMUG00000005293	GPANK1	4	137838713	137843954	-0.399022	0.0191241
cg07708721	PRRC2A	2135	6	31590586	-7.74965	1.97606	0.00440744	0.578648	ENSG00000204438	GPANK1	6	31629006	31634060	ENSMMUG00000005293	GPANK1	4	137838713	137843954	-0.399022	0.0191241
cg25516853	PRRC2A	2894	6	31591345	27.2485	11.6465	0.0474437	0.791209	ENSG00000204438	GPANK1	6	31629006	31634060	ENSMMUG00000005293	GPANK1	4	137838713	137843954	-0.399022	0.0191241
cg25626453	PRRC2A	11075	6	31599526	17.339	6.65785	0.0314075	0.766557	ENSG00000204438	GPANK1	6	31629006	31634060	ENSMMUG00000005293	GPANK1	4	137838713	137843954	-0.399022	0.0191241
cg02572517	PRRC2A	11303	6	31599754	-52.1787	21.187	0.0391493	0.778237	ENSG00000204438	GPANK1	6	31629006	31634060	ENSMMUG00000005293	GPANK1	4	137838713	137843954	-0.399022	0.0191241
cg04419856	PRRC2A	11504	6	31599955	15.4154	5.33028	0.0201358	0.739266	ENSG00000204438	GPANK1	6	31629006	31634060	ENSMMUG00000005293	GPANK1	4	137838713	137843954	-0.399022	0.0191241
cg22538505	PRRC2A	12002	6	31600453	10.2344	3.40044	0.0168208	0.72407	ENSG00000204438	GPANK1	6	31629006	31634060	ENSMMUG00000005293	GPANK1	4	137838713	137843954	-0.399022	0.0191241
cg04960128	PRRC2A	12244	6	31600695	11.1343	4.64062	0.0432237	0.784844	ENSG00000204438	GPANK1	6	31629006	31634060	ENSMMUG00000005293	GPANK1	4	137838713	137843954	-0.399022	0.0191241
cg25145715	BAG6	557	6	31619920	25.2029	10.5076	0.0432745	0.784844	ENSG00000204438	GPANK1	6	31629006	31634060	ENSMMUG00000005293	GPANK1	4	137838713	137843954	-0.399022	0.0191241
cg03098515	BAG6	528	6	31619949	16.0048	6.27742	0.0341968	0.770978	ENSG00000204438	GPANK1	6	31629006	31634060	ENSMMUG00000005293	GPANK1	4	137838713	137843954	-0.399022	0.0191241
cg04477291	APOM	422	6	31620610	51.9901	17.5203	0.0179415	0.726332	ENSG00000204438	GPANK1	6	31629006	31634060	ENSMMUG00000005293	GPANK1	4	137838713	137843954	-0.399022	0.0191241
cg11569933	GPANK1	2385	6	31631675	14.4149	5.81756	0.038241	0.777605	ENSG00000204438	GPANK1	6	31629006	31634060	ENSMMUG00000005293	GPANK1	4	137838713	137843954	-0.399022	0.0191241
cg14426347	GPANK1	1233	6	31632827	62.5859	19.5083	0.0124584	0.700689	ENSG00000204438	GPANK1	6	31629006	31634060	ENSMMUG00000005293	GPANK1	4	137838713	137843954	-0.399022	0.0191241
cg21656578	GPANK1	1175	6	31632885	27.6531	10.7728	0.0332854	0.769691	ENSG00000204438	GPANK1	6	31629006	31634060	ENSMMUG00000005293	GPANK1	4	137838713	137843954	-0.399022	0.0191241
cg17124278	GPANK1	1107	6	31632953	62.0031	8.93574	0.00011976	0.459402	ENSG00000204438	GPANK1	6	31629006	31634060	ENSMMUG00000005293	GPANK1	4	137838713	137843954	-0.399022	0.0191241
cg06667222	LY6G5C	2823	6	31648994	6.51627	2.58705	0.0358754	0.777345	ENSG00000204438	GPANK1	6	31629006	31634060	ENSMMUG00000005293	GPANK1	4	137838713	137843954	-0.399022	0.0191241
cg14463529	LY6G5C	2735	6	31649082	2.494	1.05898	0.0463104	0.788487	ENSG00000204438	GPANK1	6	31629006	31634060	ENSMMUG00000005293	GPANK1	4	137838713	137843954	-0.399022	0.0191241
cg02683578	LY6G5C	2385	6	31649432	5.3571	1.91693	0.0233911	0.748965	ENSG00000204438	GPANK1	6	31629006	31634060	ENSMMUG00000005293	GPANK1	4	137838713	137843954	-0.399022	0.0191241
cg00965469	LY6G5C	2348	6	31649469	7.75277	1.82253	0.00278453	0.562083	ENSG00000204438	GPANK1	6	31629006	31634060	ENSMMUG00000005293	GPANK1	4	137838713	137843954	-0.399022	0.0191241
cg05857999	LY6G5C	1057	6	31650760	-2.57596	0.749443	0.00886077	0.657652	ENSG00000204438	GPANK1	6	31629006	31634060	ENSMMUG00000005293	GPANK1	4	137838713	137843954	-0.399022	0.0191241
cg14917589	MPIG6B	1638	6	31692760	20.4663	6.6503	0.0151743	0.719588	ENSG00000204438	GPANK1	6	31629006	31634060	ENSMMUG00000005293	GPANK1	4	137838713	137843954	-0.399022	0.0191241
cg27506783	DDAH2	1264	6	31696775	5.70043	2.46335	0.0493722	0.791209	ENSG00000204438	GPANK1	6	31629006	31634060	ENSMMUG00000005293	GPANK1	4	137838713	137843954	-0.399022	0.0191241
cg12442899	DDAH2	32	6	31698007	7.40795	2.89395	0.0336572	0.769691	ENSG00000204438	GPANK1	6	31629006	31634060	ENSMMUG00000005293	GPANK1	4	137838713	137843954	-0.399022	0.0191241
cg00579105	CLIC1	245	6	31704587	10.6684	3.47768	0.0154021	0.719588	ENSG00000204438	GPANK1	6	31629006	31634060	ENSMMUG00000005293	GPANK1	4	137838713	137843954	-0.399022	0.0191241
cg16587838	CLIC1	363	6	31704705	3.29092	1.26848	0.0318954	0.766687	ENSG00000204438	GPANK1	6	31629006	31634060	ENSMMUG00000005293	GPANK1	4	137838713	137843954	-0.399022	0.0191241
cg01578324	CLIC1	432	6	31704774	2.7516	0.796973	0.00866211	0.655824	ENSG00000204438	GPANK1	6	31629006	31634060	ENSMMUG00000005293	GPANK1	4	137838713	137843954	-0.399022	0.0191241
cg02067612	MSH5-SAPCD1	2862	6	31725978	10.3301	2.25826	0.00181542	0.529224	ENSG00000204438	GPANK1	6	31629006	31634060	ENSMMUG00000005293	GPANK1	4	137838713	137843954	-0.399022	0.0191241
cg19868934	MSH5-SAPCD1	2518	6	31729721	7.5674	3.26061	0.0488543	0.791209	ENSG00000204438	GPANK1	6	31629006	31634060	ENSMMUG00000005293	GPANK1	4	137838713	137843954	-0.399022	0.0191241
cg05565809	VWA7	4321	6	31740787	19.099	7.50799	0.0345052	0.773441	ENSG00000204438	GPANK1	6	31629006	31634060	ENSMMUG00000005293	GPANK1	4	137838713	137843954	-0.399022	0.0191241
cg12053296	VARS	16904	6	31746808	-15.6038	5.91821	0.0298718	0.763295	ENSG00000204438	GPANK1	6	31629006	31634060	ENSMMUG00000005293	GPANK1	4	137838713	137843954	-0.399022	0.0191241
cg12975324	VARS	16898	6	31746814	-17.4028	6.50539	0.0281374	0.760693	ENSG00000204438	GPANK1	6	31629006	31634060	ENSMMUG00000005293	GPANK1	4	137838713	137843954	-0.399022	0.0191241
cg09647033	VARS	16771	6	31746941	20.99	9.02456	0.0484726	0.791209	ENSG00000204438	GPANK1	6	31629006	31634060	ENSMMUG00000005293	GPANK1	4	137838713	137843954	-0.399022	0.0191241
cg02932780	VARS	1359	6	31762353	-3.65036	1.45842	0.0367722	0.777345	ENSG00000204438	GPANK1	6	31629006	31634060	ENSMMUG00000005293	GPANK1	4	137838713	137843954	-0.399022	0.0191241
cg05650552	LSM2	9561	6	31765200	-15.1063	4.50025	0.00997942	0.668824	ENSG00000204438	GPANK1	6	31629006	31634060	ENSMMUG00000005293	GPANK1	4	137838713	137843954	-0.399022	0.0191241
cg15888291	HSPA1L	4879	6	31778622	8.41436	2.2616	0.00586688	0.616881	ENSG00000204438	GPANK1	6	31629006	31634060	ENSMMUG00000005293	GPANK1	4	137838713	137843954	-0.399022	0.0191241
cg19850535	HSPA1L	740	6	31782761	-21.3094	6.93507	0.0152852	0.719588	ENSG00000204438	GPANK1	6	31629006	31634060	ENSMMUG00000005293	GPANK1	4	137838713	137843954	-0.399022	0.0191241
cg00051595	HSPA1A	6693	6	31789985	-13.4885	5.00452	0.0272734	0.760693	ENSG00000204438	GPANK1	6	31629006	31634060	ENSMMUG00000005293	GPANK1	4	137838713	137843954	-0.399022	0.0191241
cg11066066	SNHG32	549	6	31803243	10.9129	3.31127	0.0109291	0.680236	ENSG00000204438	GPANK1	6	31629006	31634060	ENSMMUG00000005293	GPANK1	4	137838713	137843954	-0.399022	0.0191241
cg07603815	NEU1	2395	6	31828314	-7.83053	3.15363	0.0379326	0.777605	ENSG00000204438	GPANK1	6	31629006	31634060	ENSMMUG00000005293	GPANK1	4	137838713	137843954	-0.399022	0.0191241
cg01473128	NEU1	2374	6	31828335	44.9903	12.3951	0.00668813	0.63507	ENSG00000204438	GPANK1	6	31629006	31634060	ENSMMUG00000005293	GPANK1	4	137838713	137843954	-0.399022	0.0191241
cg14976276	NEU1	79	6	31830630	45.4152	14.3678	0.0133766	0.715371	ENSG00000204438	GPANK1	6	31629006	31634060	ENSMMUG00000005293	GPANK1	4	137838713	137843954	-0.399022	0.0191241
cg21116447	SLC44A4	15020	6	31831803	-22.7042	9.52887	0.0443598	0.785524	ENSG00000204438	GPANK1	6	31629006	31634060	ENSMMUG00000005293	GPANK1	4	137838713	137843954	-0.399022	0.0191241
cg20498033	SLC44A4	13532	6	31833291	-6.97097	2.52646	0.0247058	0.748965	ENSG00000204438	GPANK1	6	31629006	31634060	ENSMMUG00000005293	GPANK1	4	137838713	137843954	-0.399022	0.0191241
cg04021562	SLC44A4	1296	6	31845527	-5.94768	2.09575	0.0218804	0.748965	ENSG00000204438	GPANK1	6	31629006	31634060	ENSMMUG00000005293	GPANK1	4	137838713	137843954	-0.399022	0.0191241
cg07357081	SLC44A4	26	6	31846797	5.71544	2.17408	0.0302298	0.763295	ENSG00000204438	GPANK1	6	31629006	31634060	ENSMMUG00000005293	GPANK1	4	137838713	137843954	-0.399022	0.0191241
cg00028757	EHMT2	16966	6	31848498	46.5133	19.5243	0.0443843	0.785524	ENSG00000204438	GPANK1	6	31629006	31634060	ENSMMUG00000005293	GPANK1	4	137838713	137843954	-0.399022	0.0191241
cg18052430	EHMT2	10935	6	31854529	2.6558	1.07596	0.0388123	0.778237	ENSG00000204438	GPANK1	6	31629006	31634060	ENSMMUG00000005293	GPANK1	4	137838713	137843954	-0.399022	0.0191241
cg25853673	EHMT2	10831	6	31854633	17.963	5.9241	0.0162551	0.721775	ENSG00000204438	GPANK1	6	31629006	31634060	ENSMMUG00000005293	GPANK1	4	137838713	137843954	-0.399022	0.0191241
cg04637007	EHMT2	9454	6	31856010	13.9931	5.9236	0.0457963	0.786874	ENSG00000204438	GPANK1	6	31629006	31634060	ENSMMUG00000005293	GPANK1	4	137838713	137843954	-0.399022	0.0191241
cg05720054	EHMT2	9175	6	31856289	15.2111	3.75083	0.00365665	0.578648	ENSG00000204438	GPANK1	6	31629006	31634060	ENSMMUG00000005293	GPANK1	4	137838713	137843954	-0.399022	0.0191241
cg06411506	EHMT2	9033	6	31856431	12.8677	2.64895	0.00125951	0.528423	ENSG00000204438	GPANK1	6	31629006	31634060	ENSMMUG00000005293	GPANK1	4	137838713	137843954	-0.399022	0.0191241
cg25470384	C2	2273	6	31867836	-144.384	55.464	0.0314612	0.766557	ENSG00000204438	GPANK1	6	31629006	31634060	ENSMMUG00000005293	GPANK1	4	137838713	137843954	-0.399022	0.0191241
cg23613173	C2	1305	6	31870082	36.2503	12.7758	0.0218986	0.748965	ENSG00000204438	GPANK1	6	31629006	31634060	ENSMMUG00000005293	GPANK1	4	137838713	137843954	-0.399022	0.0191241
cg10781663	C2	1307	6	31870084	26.4059	9.36177	0.0224728	0.748965	ENSG00000204438	GPANK1	6	31629006	31634060	ENSMMUG00000005293	GPANK1	4	137838713	137843954	-0.399022	0.0191241
cg04016730	ATP6V1G2	739	6	31513886	272.709	111.406	0.0400686	0.779898	ENSG00000204396	VWA7	6	31733367	31745108	ENSMMUG00000006827	VWA7	4	137727247	137738688	2.40181	0.0178278
cg23154743	NFKBIL1	50	6	31515404	-82.4866	29.4904	0.0233031	0.748965	ENSG00000204396	VWA7	6	31733367	31745108	ENSMMUG00000006827	VWA7	4	137727247	137738688	2.40181	0.0178278
cg11484872	TNF	175	6	31543169	-39.1497	16.329	0.0433417	0.784895	ENSG00000204396	VWA7	6	31733367	31745108	ENSMMUG00000006827	VWA7	4	137727247	137738688	2.40181	0.0178278
cg24540603	LTB	2285	6	31547917	141.355	58.6324	0.042451	0.784367	ENSG00000204396	VWA7	6	31733367	31745108	ENSMMUG00000006827	VWA7	4	137727247	137738688	2.40181	0.0178278
cg11930820	LTB	926	6	31549276	71.9319	25.5364	0.0226037	0.748965	ENSG00000204396	VWA7	6	31733367	31745108	ENSMMUG00000006827	VWA7	4	137727247	137738688	2.40181	0.0178278
cg22095584	BAG6	466	6	31620011	12.8052	5.32348	0.0428136	0.784367	ENSG00000204396	VWA7	6	31733367	31745108	ENSMMUG00000006827	VWA7	4	137727247	137738688	2.40181	0.0178278
cg01735191	APOM	426	6	31620614	71.7634	29.4205	0.0406132	0.782355	ENSG00000204396	VWA7	6	31733367	31745108	ENSMMUG00000006827	VWA7	4	137727247	137738688	2.40181	0.0178278
cg05861743	APOM	715	6	31624387	118.673	42.9591	0.024581	0.748965	ENSG00000204396	VWA7	6	31733367	31745108	ENSMMUG00000006827	VWA7	4	137727247	137738688	2.40181	0.0178278
cg19729369	GPANK1	3788	6	31630272	81.7636	34.8377	0.0469015	0.790323	ENSG00000204396	VWA7	6	31733367	31745108	ENSMMUG00000006827	VWA7	4	137727247	137738688	2.40181	0.0178278
cg06670599	GPANK1	2259	6	31631801	46.8317	18.6551	0.0363484	0.777345	ENSG00000204396	VWA7	6	31733367	31745108	ENSMMUG00000006827	VWA7	4	137727247	137738688	2.40181	0.0178278
cg00210002	C2	645	6	31866208	124.81	53.5591	0.0481378	0.791209	ENSG00000204396	VWA7	6	31733367	31745108	ENSMMUG00000006827	VWA7	4	137727247	137738688	2.40181	0.0178278
cg06169557	C2	2644	6	31868207	-202.833	81.8108	0.0381535	0.777605	ENSG00000204396	VWA7	6	31733367	31745108	ENSMMUG00000006827	VWA7	4	137727247	137738688	2.40181	0.0178278
cg15443075	C2	6705	6	31901972	-122.886	45.5694	0.0272137	0.760693	ENSG00000204396	VWA7	6	31733367	31745108	ENSMMUG00000006827	VWA7	4	137727247	137738688	2.40181	0.0178278
cg01595997	CFB	1462	6	31915184	-184.734	37.796	0.00121256	0.528423	ENSG00000204396	VWA7	6	31733367	31745108	ENSMMUG00000006827	VWA7	4	137727247	137738688	2.40181	0.0178278
cg11449344	CFB	6005	6	31919727	338.852	129.867	0.0311684	0.766557	ENSG00000204396	VWA7	6	31733367	31745108	ENSMMUG00000006827	VWA7	4	137727247	137738688	2.40181	0.0178278
cg09876615	NELFE	4221	6	31922643	164.203	63.5889	0.0325023	0.769691	ENSG00000204396	VWA7	6	31733367	31745108	ENSMMUG00000006827	VWA7	4	137727247	137738688	2.40181	0.0178278
cg19108542	NELFE	24	6	31926840	148.014	63.245	0.0473911	0.791209	ENSG00000204396	VWA7	6	31733367	31745108	ENSMMUG00000006827	VWA7	4	137727247	137738688	2.40181	0.0178278
cg05909390	SKIV2L	10872	6	31937454	120.079	45.9849	0.0310692	0.766557	ENSG00000204396	VWA7	6	31733367	31745108	ENSMMUG00000006827	VWA7	4	137727247	137738688	2.40181	0.0178278
cg12671121	STK19	436	6	31940516	-440.575	80.7776	0.000605696	0.47671	ENSG00000204396	VWA7	6	31733367	31745108	ENSMMUG00000006827	VWA7	4	137727247	137738688	2.40181	0.0178278
cg18058048	MPIG6B	172	6	31690949	57.0169	19.7253	0.0201824	0.739266	ENSG00000243649	CFB	6	31895475	31919861	ENSMMUG00000000729	-	4	137543942	137568944	-0.871455	0.0109498
cg08962184	DDAH2	887	6	31697152	-82.4905	34.7776	0.0451091	0.785968	ENSG00000243649	CFB	6	31895475	31919861	ENSMMUG00000000729	-	4	137543942	137568944	-0.871455	0.0109498
cg26137417	VARS	16671	6	31747041	76.0101	27.9716	0.0263543	0.755525	ENSG00000243649	CFB	6	31895475	31919861	ENSMMUG00000000729	-	4	137543942	137568944	-0.871455	0.0109498
cg11073255	VARS	1257	6	31762455	6.19664	2.45486	0.0355736	0.775795	ENSG00000243649	CFB	6	31895475	31919861	ENSMMUG00000000729	-	4	137543942	137568944	-0.871455	0.0109498
cg04659729	VARS	1024	6	31762688	46.8708	13.2824	0.00774583	0.642235	ENSG00000243649	CFB	6	31895475	31919861	ENSMMUG00000000729	-	4	137543942	137568944	-0.871455	0.0109498
cg10114372	VARS	400	6	31763312	-37.1858	15.5023	0.0432623	0.784844	ENSG00000243649	CFB	6	31895475	31919861	ENSMMUG00000000729	-	4	137543942	137568944	-0.871455	0.0109498
cg17184952	VARS	339	6	31763373	-40.1248	14.3675	0.0234586	0.748965	ENSG00000243649	CFB	6	31895475	31919861	ENSMMUG00000000729	-	4	137543942	137568944	-0.871455	0.0109498
cg05408317	LSM2	9127	6	31765634	-27.8773	9.75688	0.0212427	0.746612	ENSG00000243649	CFB	6	31895475	31919861	ENSMMUG00000000729	-	4	137543942	137568944	-0.871455	0.0109498
cg09932747	NEU1	795	6	31829914	-23.2357	9.37429	0.0381912	0.777605	ENSG00000243649	CFB	6	31895475	31919861	ENSMMUG00000000729	-	4	137543942	137568944	-0.871455	0.0109498
cg00547425	NEU1	749	6	31829960	14.8144	6.03172	0.0395598	0.778237	ENSG00000243649	CFB	6	31895475	31919861	ENSMMUG00000000729	-	4	137543942	137568944	-0.871455	0.0109498
cg10017105	SLC44A4	14395	6	31832428	-61.0645	14.1132	0.00252298	0.562083	ENSG00000243649	CFB	6	31895475	31919861	ENSMMUG00000000729	-	4	137543942	137568944	-0.871455	0.0109498
cg20961940	SLC44A4	13973	6	31832850	20.0948	6.89947	0.0195136	0.739266	ENSG00000243649	CFB	6	31895475	31919861	ENSMMUG00000000729	-	4	137543942	137568944	-0.871455	0.0109498
cg19853440	SLC44A4	8349	6	31838474	27.0397	8.24851	0.011219	0.680528	ENSG00000243649	CFB	6	31895475	31919861	ENSMMUG00000000729	-	4	137543942	137568944	-0.871455	0.0109498
cg07357081	SLC44A4	26	6	31846797	15.4823	6.16434	0.0362809	0.777345	ENSG00000243649	CFB	6	31895475	31919861	ENSMMUG00000000729	-	4	137543942	137568944	-0.871455	0.0109498
cg19770715	EHMT2	17436	6	31848028	28.775	9.74648	0.0183595	0.726332	ENSG00000243649	CFB	6	31895475	31919861	ENSMMUG00000000729	-	4	137543942	137568944	-0.871455	0.0109498
cg00723961	EHMT2	380	6	31865084	-22.0989	8.36844	0.0296789	0.763295	ENSG00000243649	CFB	6	31895475	31919861	ENSMMUG00000000729	-	4	137543942	137568944	-0.871455	0.0109498
cg18221850	C2	474	6	31866037	28.1556	11.2787	0.0371525	0.777345	ENSG00000243649	CFB	6	31895475	31919861	ENSMMUG00000000729	-	4	137543942	137568944	-0.871455	0.0109498
cg00210002	C2	645	6	31866208	-51.8327	15.6695	0.010732	0.677681	ENSG00000243649	CFB	6	31895475	31919861	ENSMMUG00000000729	-	4	137543942	137568944	-0.871455	0.0109498
cg05680710	C2	2581	6	31868144	-28.3907	12.2317	0.0488378	0.791209	ENSG00000243649	CFB	6	31895475	31919861	ENSMMUG00000000729	-	4	137543942	137568944	-0.871455	0.0109498
cg11049439	C2	3161	6	31868724	14.3989	5.89179	0.0403194	0.78099	ENSG00000243649	CFB	6	31895475	31919861	ENSMMUG00000000729	-	4	137543942	137568944	-0.871455	0.0109498
cg23613173	C2	1305	6	31870082	104.484	34.0831	0.0154518	0.719588	ENSG00000243649	CFB	6	31895475	31919861	ENSMMUG00000000729	-	4	137543942	137568944	-0.871455	0.0109498
cg04525509	C2	14208	6	31882985	-17.7603	7.58472	0.0472985	0.791209	ENSG00000243649	CFB	6	31895475	31919861	ENSMMUG00000000729	-	4	137543942	137568944	-0.871455	0.0109498
cg07880384	C2	8579	6	31913323	-15.8904	5.10954	0.0144466	0.718665	ENSG00000243649	CFB	6	31895475	31919861	ENSMMUG00000000729	-	4	137543942	137568944	-0.871455	0.0109498
cg17335741	CFB	543	6	31914265	15.8804	4.58913	0.00856216	0.65378	ENSG00000243649	CFB	6	31895475	31919861	ENSMMUG00000000729	-	4	137543942	137568944	-0.871455	0.0109498
cg25734035	CFB	1403	6	31915125	23.9735	6.35668	0.00545486	0.604671	ENSG00000243649	CFB	6	31895475	31919861	ENSMMUG00000000729	-	4	137543942	137568944	-0.871455	0.0109498
cg01595997	CFB	1462	6	31915184	52.2755	18.5965	0.0228066	0.748965	ENSG00000243649	CFB	6	31895475	31919861	ENSMMUG00000000729	-	4	137543942	137568944	-0.871455	0.0109498
cg09662003	CFB	1810	6	31915532	25.0112	10.3182	0.0415903	0.784367	ENSG00000243649	CFB	6	31895475	31919861	ENSMMUG00000000729	-	4	137543942	137568944	-0.871455	0.0109498
cg21606287	CFB	2983	6	31916705	13.1947	3.6889	0.00722117	0.638537	ENSG00000243649	CFB	6	31895475	31919861	ENSMMUG00000000729	-	4	137543942	137568944	-0.871455	0.0109498
cg11449344	CFB	6005	6	31919727	-136.626	37.8857	0.00691914	0.63581	ENSG00000243649	CFB	6	31895475	31919861	ENSMMUG00000000729	-	4	137543942	137568944	-0.871455	0.0109498
cg14248981	SKIV2L	10484	6	31937066	26.2355	10.3912	0.035543	0.775795	ENSG00000243649	CFB	6	31895475	31919861	ENSMMUG00000000729	-	4	137543942	137568944	-0.871455	0.0109498
cg05455825	STK19	193	6	31939840	-43.1918	17.9768	0.0429991	0.784367	ENSG00000243649	CFB	6	31895475	31919861	ENSMMUG00000000729	-	4	137543942	137568944	-0.871455	0.0109498
cg05701765	TNXB	998	6	31980052	18.2343	7.27742	0.0366208	0.777345	ENSG00000243649	CFB	6	31895475	31919861	ENSMMUG00000000729	-	4	137543942	137568944	-0.871455	0.0109498
cg01716499	TNXB	65581	6	32011570	27.4758	8.24129	0.0103241	0.668824	ENSG00000243649	CFB	6	31895475	31919861	ENSMMUG00000000729	-	4	137543942	137568944	-0.871455	0.0109498
cg03819671	TNXB	63148	6	32014003	14.5439	4.03763	0.00696121	0.63581	ENSG00000243649	CFB	6	31895475	31919861	ENSMMUG00000000729	-	4	137543942	137568944	-0.871455	0.0109498
cg18178844	TNXB	63051	6	32014100	17.3011	6.53444	0.029361	0.763295	ENSG00000243649	CFB	6	31895475	31919861	ENSMMUG00000000729	-	4	137543942	137568944	-0.871455	0.0109498
cg06824720	TNXB	63003	6	32014148	9.56396	3.98599	0.0432175	0.784844	ENSG00000243649	CFB	6	31895475	31919861	ENSMMUG00000000729	-	4	137543942	137568944	-0.871455	0.0109498
cg11431261	TNXB	61854	6	32015297	23.5336	9.60582	0.0399412	0.779136	ENSG00000243649	CFB	6	31895475	31919861	ENSMMUG00000000729	-	4	137543942	137568944	-0.871455	0.0109498
cg20858622	TNXB	61500	6	32015651	4.6058	1.42238	0.0119117	0.690983	ENSG00000243649	CFB	6	31895475	31919861	ENSMMUG00000000729	-	4	137543942	137568944	-0.871455	0.0109498
cg10014874	TNXB	61463	6	32015688	7.55516	3.15429	0.0435011	0.785505	ENSG00000243649	CFB	6	31895475	31919861	ENSMMUG00000000729	-	4	137543942	137568944	-0.871455	0.0109498
cg15670990	TNXB	61036	6	32016115	69.6763	20.5979	0.00960323	0.668439	ENSG00000243649	CFB	6	31895475	31919861	ENSMMUG00000000729	-	4	137543942	137568944	-0.871455	0.0109498
cg17115172	TNXB	60979	6	32016172	25.1373	5.26571	0.00140182	0.528423	ENSG00000243649	CFB	6	31895475	31919861	ENSMMUG00000000729	-	4	137543942	137568944	-0.871455	0.0109498
cg02432444	TNXB	60937	6	32016214	8.87632	2.45327	0.00680078	0.63507	ENSG00000243649	CFB	6	31895475	31919861	ENSMMUG00000000729	-	4	137543942	137568944	-0.871455	0.0109498
cg22259126	TNXB	56401	6	32020750	6.25435	1.98746	0.0136621	0.715371	ENSG00000243649	CFB	6	31895475	31919861	ENSMMUG00000000729	-	4	137543942	137568944	-0.871455	0.0109498
cg06418131	TNXB	53501	6	32023650	9.68215	3.903	0.0380705	0.777605	ENSG00000243649	CFB	6	31895475	31919861	ENSMMUG00000000729	-	4	137543942	137568944	-0.871455	0.0109498
cg23173817	TNXB	52534	6	32024617	26.3736	9.82386	0.0277256	0.760693	ENSG00000243649	CFB	6	31895475	31919861	ENSMMUG00000000729	-	4	137543942	137568944	-0.871455	0.0109498
cg20113726	TNXB	51242	6	32025909	-11.9709	3.19188	0.0056208	0.609392	ENSG00000243649	CFB	6	31895475	31919861	ENSMMUG00000000729	-	4	137543942	137568944	-0.871455	0.0109498
cg21230578	TNXB	46963	6	32030188	6.83532	2.92086	0.0474027	0.791209	ENSG00000243649	CFB	6	31895475	31919861	ENSMMUG00000000729	-	4	137543942	137568944	-0.871455	0.0109498
cg02157454	TNXB	40747	6	32036404	29.7388	6.33435	0.00155177	0.528423	ENSG00000243649	CFB	6	31895475	31919861	ENSMMUG00000000729	-	4	137543942	137568944	-0.871455	0.0109498
cg05596841	TNXB	39351	6	32037800	12.5506	5.38263	0.0480351	0.791209	ENSG00000243649	CFB	6	31895475	31919861	ENSMMUG00000000729	-	4	137543942	137568944	-0.871455	0.0109498
cg03822479	TNXB	39238	6	32037913	25.1427	7.07816	0.00748595	0.640812	ENSG00000243649	CFB	6	31895475	31919861	ENSMMUG00000000729	-	4	137543942	137568944	-0.871455	0.0109498
cg25772658	TNXB	39124	6	32038027	31.3932	11.1597	0.0227349	0.748965	ENSG00000243649	CFB	6	31895475	31919861	ENSMMUG00000000729	-	4	137543942	137568944	-0.871455	0.0109498
cg26796851	TNXB	37352	6	32039799	20.0944	5.13293	0.00445089	0.578648	ENSG00000243649	CFB	6	31895475	31919861	ENSMMUG00000000729	-	4	137543942	137568944	-0.871455	0.0109498
cg03013488	TNXB	37261	6	32039890	-21.99	8.21522	0.0280674	0.760693	ENSG00000243649	CFB	6	31895475	31919861	ENSMMUG00000000729	-	4	137543942	137568944	-0.871455	0.0109498
cg13396436	TNXB	35583	6	32041568	-17.0984	7.39135	0.0494339	0.791209	ENSG00000243649	CFB	6	31895475	31919861	ENSMMUG00000000729	-	4	137543942	137568944	-0.871455	0.0109498
cg04076535	TNXB	31828	6	32045323	-19.1787	6.89226	0.0238273	0.748965	ENSG00000243649	CFB	6	31895475	31919861	ENSMMUG00000000729	-	4	137543942	137568944	-0.871455	0.0109498
cg03204140	TNXB	31814	6	32045337	-23.9697	5.1312	0.00159966	0.528423	ENSG00000243649	CFB	6	31895475	31919861	ENSMMUG00000000729	-	4	137543942	137568944	-0.871455	0.0109498
cg15922080	TNXB	30245	6	32046906	-21.9269	9.06686	0.0419572	0.784367	ENSG00000243649	CFB	6	31895475	31919861	ENSMMUG00000000729	-	4	137543942	137568944	-0.871455	0.0109498
cg02402214	TNXB	30201	6	32046950	-14.1467	3.4934	0.0036865	0.578648	ENSG00000243649	CFB	6	31895475	31919861	ENSMMUG00000000729	-	4	137543942	137568944	-0.871455	0.0109498
cg05680111	TNXB	30029	6	32047122	-7.07648	2.63119	0.0275196	0.760693	ENSG00000243649	CFB	6	31895475	31919861	ENSMMUG00000000729	-	4	137543942	137568944	-0.871455	0.0109498
cg02996364	TNXB	29440	6	32047711	-11.0525	3.98889	0.0242657	0.748965	ENSG00000243649	CFB	6	31895475	31919861	ENSMMUG00000000729	-	4	137543942	137568944	-0.871455	0.0109498
cg19736604	TNXB	24862	6	32052289	-8.15586	2.48204	0.0110888	0.680357	ENSG00000243649	CFB	6	31895475	31919861	ENSMMUG00000000729	-	4	137543942	137568944	-0.871455	0.0109498
cg20666807	TNXB	24817	6	32052334	-12.3161	3.78613	0.0116496	0.689128	ENSG00000243649	CFB	6	31895475	31919861	ENSMMUG00000000729	-	4	137543942	137568944	-0.871455	0.0109498
cg15111386	TNXB	24758	6	32052393	-37.1865	10.8127	0.00883495	0.657596	ENSG00000243649	CFB	6	31895475	31919861	ENSMMUG00000000729	-	4	137543942	137568944	-0.871455	0.0109498
cg20331241	TNXB	24742	6	32052409	-11.7292	3.62613	0.0119738	0.690983	ENSG00000243649	CFB	6	31895475	31919861	ENSMMUG00000000729	-	4	137543942	137568944	-0.871455	0.0109498
cg17146473	TNXB	24723	6	32052428	-14.5072	3.18691	0.00186914	0.529224	ENSG00000243649	CFB	6	31895475	31919861	ENSMMUG00000000729	-	4	137543942	137568944	-0.871455	0.0109498
cg12493058	TNXB	24707	6	32052444	-18.6593	7.23263	0.0326229	0.769691	ENSG00000243649	CFB	6	31895475	31919861	ENSMMUG00000000729	-	4	137543942	137568944	-0.871455	0.0109498
cg08362880	TNXB	23551	6	32053600	-15.7075	2.85884	0.000577561	0.47671	ENSG00000243649	CFB	6	31895475	31919861	ENSMMUG00000000729	-	4	137543942	137568944	-0.871455	0.0109498
cg06539391	TNXB	23510	6	32053641	-10.6979	2.71162	0.00426448	0.578648	ENSG00000243649	CFB	6	31895475	31919861	ENSMMUG00000000729	-	4	137543942	137568944	-0.871455	0.0109498
cg04172115	TNXB	23423	6	32053728	-13.3474	2.94445	0.00191656	0.532115	ENSG00000243649	CFB	6	31895475	31919861	ENSMMUG00000000729	-	4	137543942	137568944	-0.871455	0.0109498
cg11576405	TNXB	23403	6	32053748	-18.6131	4.67771	0.00406671	0.578648	ENSG00000243649	CFB	6	31895475	31919861	ENSMMUG00000000729	-	4	137543942	137568944	-0.871455	0.0109498
cg14737484	TNXB	22590	6	32054561	-12.0971	3.20934	0.00547076	0.604671	ENSG00000243649	CFB	6	31895475	31919861	ENSMMUG00000000729	-	4	137543942	137568944	-0.871455	0.0109498
cg20471413	TNXB	22016	6	32055135	13.5943	4.71523	0.0204156	0.740352	ENSG00000243649	CFB	6	31895475	31919861	ENSMMUG00000000729	-	4	137543942	137568944	-0.871455	0.0109498
cg24055029	TNXB	22014	6	32055137	9.89926	3.55101	0.023641	0.748965	ENSG00000243649	CFB	6	31895475	31919861	ENSMMUG00000000729	-	4	137543942	137568944	-0.871455	0.0109498
cg10812186	TNXB	22005	6	32055146	8.07002	2.85271	0.0221879	0.748965	ENSG00000243649	CFB	6	31895475	31919861	ENSMMUG00000000729	-	4	137543942	137568944	-0.871455	0.0109498
cg23724858	TNXB	21440	6	32055711	38.3806	11.3201	0.00949323	0.667237	ENSG00000243649	CFB	6	31895475	31919861	ENSMMUG00000000729	-	4	137543942	137568944	-0.871455	0.0109498
cg00169019	TNXB	20713	6	32056438	-7.60522	2.91187	0.0310434	0.766557	ENSG00000243649	CFB	6	31895475	31919861	ENSMMUG00000000729	-	4	137543942	137568944	-0.871455	0.0109498
cg11091250	TNXB	20551	6	32056600	20.8474	6.75114	0.0149353	0.719588	ENSG00000243649	CFB	6	31895475	31919861	ENSMMUG00000000729	-	4	137543942	137568944	-0.871455	0.0109498
cg17755604	TNXB	20514	6	32056637	55.3451	18.2866	0.0163956	0.721942	ENSG00000243649	CFB	6	31895475	31919861	ENSMMUG00000000729	-	4	137543942	137568944	-0.871455	0.0109498
cg23814714	TNXB	20416	6	32056735	18.5838	7.46164	0.0374888	0.777605	ENSG00000243649	CFB	6	31895475	31919861	ENSMMUG00000000729	-	4	137543942	137568944	-0.871455	0.0109498
cg09123524	TNXB	14253	6	32062898	33.3289	11.3033	0.018465	0.727819	ENSG00000243649	CFB	6	31895475	31919861	ENSMMUG00000000729	-	4	137543942	137568944	-0.871455	0.0109498
cg04753078	TNXB	13532	6	32063619	12.9962	4.15157	0.0140062	0.717622	ENSG00000243649	CFB	6	31895475	31919861	ENSMMUG00000000729	-	4	137543942	137568944	-0.871455	0.0109498
cg01033871	TNXB	12314	6	32064837	18.2956	4.98837	0.0063309	0.629002	ENSG00000243649	CFB	6	31895475	31919861	ENSMMUG00000000729	-	4	137543942	137568944	-0.871455	0.0109498
cg00355613	TNXB	12195	6	32064956	18.1847	5.86117	0.0146088	0.718665	ENSG00000243649	CFB	6	31895475	31919861	ENSMMUG00000000729	-	4	137543942	137568944	-0.871455	0.0109498
cg19647111	TNXB	12436	6	32073035	17.105	7.32284	0.0477241	0.791209	ENSG00000243649	CFB	6	31895475	31919861	ENSMMUG00000000729	-	4	137543942	137568944	-0.871455	0.0109498
cg19935845	TNXB	10615	6	32074856	17.3919	4.87355	0.00730818	0.638537	ENSG00000243649	CFB	6	31895475	31919861	ENSMMUG00000000729	-	4	137543942	137568944	-0.871455	0.0109498
cg09872737	TNXB	9201	6	32076270	21.4736	8.22625	0.0311124	0.766557	ENSG00000243649	CFB	6	31895475	31919861	ENSMMUG00000000729	-	4	137543942	137568944	-0.871455	0.0109498
cg03543593	TNXB	9054	6	32076417	9.43622	2.3054	0.0034707	0.577611	ENSG00000243649	CFB	6	31895475	31919861	ENSMMUG00000000729	-	4	137543942	137568944	-0.871455	0.0109498
cg25587092	TNXB	8565	6	32076906	6.64525	1.94512	0.00913682	0.664974	ENSG00000243649	CFB	6	31895475	31919861	ENSMMUG00000000729	-	4	137543942	137568944	-0.871455	0.0109498
cg14607161	TNXB	1173	6	32084298	18.6325	5.06803	0.00625075	0.625926	ENSG00000243649	CFB	6	31895475	31919861	ENSMMUG00000000729	-	4	137543942	137568944	-0.871455	0.0109498
cg02210149	FKBPL	1468	6	32096599	-17.6406	6.9371	0.0345525	0.773549	ENSG00000243649	CFB	6	31895475	31919861	ENSMMUG00000000729	-	4	137543942	137568944	-0.871455	0.0109498
cg24746997	FKBPL	84	6	32098152	52.7925	20.6381	0.0337509	0.769691	ENSG00000243649	CFB	6	31895475	31919861	ENSMMUG00000000729	-	4	137543942	137568944	-0.871455	0.0109498
cg05069385	FKBPL	179	6	32098247	12.0253	4.71892	0.0342648	0.771721	ENSG00000243649	CFB	6	31895475	31919861	ENSMMUG00000000729	-	4	137543942	137568944	-0.871455	0.0109498
cg18879780	FKBPL	185	6	32098253	-56.5573	22.1315	0.0338826	0.769691	ENSG00000243649	CFB	6	31895475	31919861	ENSMMUG00000000729	-	4	137543942	137568944	-0.871455	0.0109498
cg13705391	PRRT1	2419	6	32118441	10.5188	3.10505	0.00953319	0.667883	ENSG00000243649	CFB	6	31895475	31919861	ENSMMUG00000000729	-	4	137543942	137568944	-0.871455	0.0109498
cg00254681	PRRT1	2403	6	32118457	12.1569	4.40588	0.0247033	0.748965	ENSG00000243649	CFB	6	31895475	31919861	ENSMMUG00000000729	-	4	137543942	137568944	-0.871455	0.0109498
cg06814287	PRRT1	276	6	32120584	12.5858	4.64755	0.0267386	0.757604	ENSG00000243649	CFB	6	31895475	31919861	ENSMMUG00000000729	-	4	137543942	137568944	-0.871455	0.0109498
cg08045906	PRRT1	235	6	32120625	6.96152	2.83975	0.0398465	0.779136	ENSG00000243649	CFB	6	31895475	31919861	ENSMMUG00000000729	-	4	137543942	137568944	-0.871455	0.0109498
cg25426302	PRRT1	34	6	32120826	51.0472	16.7068	0.01569	0.719588	ENSG00000243649	CFB	6	31895475	31919861	ENSMMUG00000000729	-	4	137543942	137568944	-0.871455	0.0109498
cg00226265	EGFL8	2107	6	32134490	-62.2556	23.82	0.0309575	0.766557	ENSG00000243649	CFB	6	31895475	31919861	ENSMMUG00000000729	-	4	137543942	137568944	-0.871455	0.0109498
cg08550588	DDAH2	1976	6	31696063	14.0118	5.24047	0.0281969	0.760693	ENSG00000204351	SKIV2L	6	31926857	31937532	ENSMMUG00000000736	SKIV2L	4	137523877	137537121	-0.397105	0.010777
cg16587838	CLIC1	363	6	31704705	3.03463	1.30619	0.0486709	0.791209	ENSG00000204351	SKIV2L	6	31926857	31937532	ENSMMUG00000000736	SKIV2L	4	137523877	137537121	-0.397105	0.010777
cg24542360	MSH5-SAPCD1	2701	6	31729904	7.16389	2.97103	0.0424255	0.784367	ENSG00000204351	SKIV2L	6	31926857	31937532	ENSMMUG00000000736	SKIV2L	4	137523877	137537121	-0.397105	0.010777
cg20051324	MSH5-SAPCD1	5064	6	31732267	-1.63319	0.601365	0.0264194	0.755906	ENSG00000204351	SKIV2L	6	31926857	31937532	ENSMMUG00000000736	SKIV2L	4	137523877	137537121	-0.397105	0.010777
cg26137417	VARS	16671	6	31747041	25.8195	10.2354	0.0356655	0.776146	ENSG00000204351	SKIV2L	6	31926857	31937532	ENSMMUG00000000736	SKIV2L	4	137523877	137537121	-0.397105	0.010777
cg03073361	VARS	16475	6	31747237	-7.02552	2.9209	0.0428236	0.784367	ENSG00000204351	SKIV2L	6	31926857	31937532	ENSMMUG00000000736	SKIV2L	4	137523877	137537121	-0.397105	0.010777
cg17619755	VARS	3083	6	31760629	6.87862	2.88772	0.044405	0.785524	ENSG00000204351	SKIV2L	6	31926857	31937532	ENSMMUG00000000736	SKIV2L	4	137523877	137537121	-0.397105	0.010777
cg02597894	VARS	2916	6	31760796	17.1661	4.91358	0.0081552	0.650664	ENSG00000204351	SKIV2L	6	31926857	31937532	ENSMMUG00000000736	SKIV2L	4	137523877	137537121	-0.397105	0.010777
cg17184952	VARS	339	6	31763373	-13.2039	5.40107	0.0402698	0.780753	ENSG00000204351	SKIV2L	6	31926857	31937532	ENSMMUG00000000736	SKIV2L	4	137523877	137537121	-0.397105	0.010777
cg19811425	HSPA1L	4800	6	31778701	11.422	4.472	0.0339565	0.769691	ENSG00000204351	SKIV2L	6	31926857	31937532	ENSMMUG00000000736	SKIV2L	4	137523877	137537121	-0.397105	0.010777
cg19860840	HSPA1B	2625	6	31798138	-3.33005	1.38219	0.0425572	0.784367	ENSG00000204351	SKIV2L	6	31926857	31937532	ENSMMUG00000000736	SKIV2L	4	137523877	137537121	-0.397105	0.010777
cg11066066	SNHG32	549	6	31803243	8.98973	3.85072	0.0478201	0.791209	ENSG00000204351	SKIV2L	6	31926857	31937532	ENSMMUG00000000736	SKIV2L	4	137523877	137537121	-0.397105	0.010777
cg10012878	NEU1	2851	6	31827858	-16.5881	5.20434	0.0128544	0.7066	ENSG00000204351	SKIV2L	6	31926857	31937532	ENSMMUG00000000736	SKIV2L	4	137523877	137537121	-0.397105	0.010777
cg16790849	NEU1	1198	6	31829511	-7.4725	2.3019	0.0117674	0.689128	ENSG00000204351	SKIV2L	6	31926857	31937532	ENSMMUG00000000736	SKIV2L	4	137523877	137537121	-0.397105	0.010777
cg00547425	NEU1	749	6	31829960	5.73603	1.96594	0.0193591	0.737108	ENSG00000204351	SKIV2L	6	31926857	31937532	ENSMMUG00000000736	SKIV2L	4	137523877	137537121	-0.397105	0.010777
cg22753340	SLC44A4	15334	6	31831489	-29.6049	11.1621	0.0291528	0.762326	ENSG00000204351	SKIV2L	6	31926857	31937532	ENSMMUG00000000736	SKIV2L	4	137523877	137537121	-0.397105	0.010777
cg07357081	SLC44A4	26	6	31846797	5.81099	2.06763	0.0228269	0.748965	ENSG00000204351	SKIV2L	6	31926857	31937532	ENSMMUG00000000736	SKIV2L	4	137523877	137537121	-0.397105	0.010777
cg01280069	EHMT2	13224	6	31852240	24.7878	9.27942	0.0283066	0.760693	ENSG00000204351	SKIV2L	6	31926857	31937532	ENSMMUG00000000736	SKIV2L	4	137523877	137537121	-0.397105	0.010777
cg18052430	EHMT2	10935	6	31854529	3.14795	0.853224	0.00613477	0.620448	ENSG00000204351	SKIV2L	6	31926857	31937532	ENSMMUG00000000736	SKIV2L	4	137523877	137537121	-0.397105	0.010777
cg06411506	EHMT2	9033	6	31856431	10.8573	3.46291	0.0139033	0.717622	ENSG00000204351	SKIV2L	6	31926857	31937532	ENSMMUG00000000736	SKIV2L	4	137523877	137537121	-0.397105	0.010777
cg00723961	EHMT2	380	6	31865084	-7.83163	2.95285	0.0291548	0.762326	ENSG00000204351	SKIV2L	6	31926857	31937532	ENSMMUG00000000736	SKIV2L	4	137523877	137537121	-0.397105	0.010777
cg02082252	C2	723	6	31866286	-68.7009	14.3781	0.00139395	0.528423	ENSG00000204351	SKIV2L	6	31926857	31937532	ENSMMUG00000000736	SKIV2L	4	137523877	137537121	-0.397105	0.010777
cg06169557	C2	2644	6	31868207	24.2718	10.2459	0.0453213	0.786097	ENSG00000204351	SKIV2L	6	31926857	31937532	ENSMMUG00000000736	SKIV2L	4	137523877	137537121	-0.397105	0.010777
cg13163218	C2	1315	6	31870092	-11.7639	3.60905	0.0115351	0.689128	ENSG00000204351	SKIV2L	6	31926857	31937532	ENSMMUG00000000736	SKIV2L	4	137523877	137537121	-0.397105	0.010777
cg00210648	C2	22072	6	31890849	-2.07839	0.703223	0.0182707	0.726332	ENSG00000204351	SKIV2L	6	31926857	31937532	ENSMMUG00000000736	SKIV2L	4	137523877	137537121	-0.397105	0.010777
cg25734035	CFB	1403	6	31915125	6.69619	2.90303	0.0499518	0.791678	ENSG00000204351	SKIV2L	6	31926857	31937532	ENSMMUG00000000736	SKIV2L	4	137523877	137537121	-0.397105	0.010777
cg01869058	NELFE	668	6	31926196	-4.57766	1.89343	0.0420033	0.784367	ENSG00000204351	SKIV2L	6	31926857	31937532	ENSMMUG00000000736	SKIV2L	4	137523877	137537121	-0.397105	0.010777
cg10201402	DXO	1505	6	31938527	7.31594	2.47676	0.0183179	0.726332	ENSG00000204351	SKIV2L	6	31926857	31937532	ENSMMUG00000000736	SKIV2L	4	137523877	137537121	-0.397105	0.010777
cg05455825	STK19	193	6	31939840	-19.0102	4.93741	0.00487595	0.588695	ENSG00000204351	SKIV2L	6	31926857	31937532	ENSMMUG00000000736	SKIV2L	4	137523877	137537121	-0.397105	0.010777
cg02070866	STK19	225	6	31940305	-12.6267	4.77785	0.029586	0.763295	ENSG00000204351	SKIV2L	6	31926857	31937532	ENSMMUG00000000736	SKIV2L	4	137523877	137537121	-0.397105	0.010777
cg25772658	TNXB	39124	6	32038027	10.061	4.27977	0.0466217	0.788915	ENSG00000204351	SKIV2L	6	31926857	31937532	ENSMMUG00000000736	SKIV2L	4	137523877	137537121	-0.397105	0.010777
cg04076535	TNXB	31828	6	32045323	-6.15067	2.63769	0.0480236	0.791209	ENSG00000204351	SKIV2L	6	31926857	31937532	ENSMMUG00000000736	SKIV2L	4	137523877	137537121	-0.397105	0.010777
cg15922080	TNXB	30245	6	32046906	-8.11101	3.09298	0.0305366	0.765589	ENSG00000204351	SKIV2L	6	31926857	31937532	ENSMMUG00000000736	SKIV2L	4	137523877	137537121	-0.397105	0.010777
cg03611618	TNXB	26819	6	32050332	-8.6204	2.85341	0.016532	0.722667	ENSG00000204351	SKIV2L	6	31926857	31937532	ENSMMUG00000000736	SKIV2L	4	137523877	137537121	-0.397105	0.010777
cg19736604	TNXB	24862	6	32052289	-2.58287	0.987766	0.0308961	0.766557	ENSG00000204351	SKIV2L	6	31926857	31937532	ENSMMUG00000000736	SKIV2L	4	137523877	137537121	-0.397105	0.010777
cg20666807	TNXB	24817	6	32052334	-4.05991	1.44982	0.0231879	0.748965	ENSG00000204351	SKIV2L	6	31926857	31937532	ENSMMUG00000000736	SKIV2L	4	137523877	137537121	-0.397105	0.010777
cg15111386	TNXB	24758	6	32052393	-11.3804	4.47611	0.034577	0.773549	ENSG00000204351	SKIV2L	6	31926857	31937532	ENSMMUG00000000736	SKIV2L	4	137523877	137537121	-0.397105	0.010777
cg20331241	TNXB	24742	6	32052409	-4.57642	1.08425	0.00291255	0.56545	ENSG00000204351	SKIV2L	6	31926857	31937532	ENSMMUG00000000736	SKIV2L	4	137523877	137537121	-0.397105	0.010777
cg17146473	TNXB	24723	6	32052428	-4.55716	1.40087	0.0116472	0.689128	ENSG00000204351	SKIV2L	6	31926857	31937532	ENSMMUG00000000736	SKIV2L	4	137523877	137537121	-0.397105	0.010777
cg23186098	TNXB	21032	6	32056119	-3.81323	1.31158	0.019669	0.739266	ENSG00000204351	SKIV2L	6	31926857	31937532	ENSMMUG00000000736	SKIV2L	4	137523877	137537121	-0.397105	0.010777
cg21289669	TNXB	12387	6	32064764	-4.35277	1.76189	0.0386796	0.778237	ENSG00000204351	SKIV2L	6	31926857	31937532	ENSMMUG00000000736	SKIV2L	4	137523877	137537121	-0.397105	0.010777
cg17066403	TNXB	12123	6	32065028	-7.65338	2.95272	0.0320148	0.766747	ENSG00000204351	SKIV2L	6	31926857	31937532	ENSMMUG00000000736	SKIV2L	4	137523877	137537121	-0.397105	0.010777
cg16478197	TNXB	17290	6	32068181	2.05284	0.868595	0.0457147	0.786173	ENSG00000204351	SKIV2L	6	31926857	31937532	ENSMMUG00000000736	SKIV2L	4	137523877	137537121	-0.397105	0.010777
cg18979423	ATF6B	2417	6	32085780	-3.25713	1.15543	0.0225294	0.748965	ENSG00000204351	SKIV2L	6	31926857	31937532	ENSMMUG00000000736	SKIV2L	4	137523877	137537121	-0.397105	0.010777
cg02210149	FKBPL	1468	6	32096599	-5.99238	2.5279	0.045211	0.786097	ENSG00000204351	SKIV2L	6	31926857	31937532	ENSMMUG00000000736	SKIV2L	4	137523877	137537121	-0.397105	0.010777
cg18879780	FKBPL	185	6	32098253	-21.5169	7.3037	0.0185379	0.728209	ENSG00000204351	SKIV2L	6	31926857	31937532	ENSMMUG00000000736	SKIV2L	4	137523877	137537121	-0.397105	0.010777
cg15194163	PRRT1	2647	6	32118213	3.95941	1.52021	0.031397	0.766557	ENSG00000204351	SKIV2L	6	31926857	31937532	ENSMMUG00000000736	SKIV2L	4	137523877	137537121	-0.397105	0.010777
cg10262770	EGFL8	2987	6	32135370	11.9385	4.47167	0.028371	0.760693	ENSG00000204351	SKIV2L	6	31926857	31937532	ENSMMUG00000000736	SKIV2L	4	137523877	137537121	-0.397105	0.010777
cg05598103	TNXB	54222	6	32022929	-13.2421	3.24594	0.00353612	0.578648	ENSG00000204301	NOTCH4	6	32162620	32191844	ENSMMUG00000018461	NOTCH4	4	137281522	137310354	0.667041	0.046604
cg20044550	TNXB	51265	6	32025886	-38.4812	10.0989	0.00515955	0.598689	ENSG00000204301	NOTCH4	6	32162620	32191844	ENSMMUG00000018461	NOTCH4	4	137281522	137310354	0.667041	0.046604
cg12832856	TNXB	49528	6	32027623	-4.64684	1.76458	0.0300197	0.763295	ENSG00000204301	NOTCH4	6	32162620	32191844	ENSMMUG00000018461	NOTCH4	4	137281522	137310354	0.667041	0.046604
cg13069985	TNXB	40133	6	32037018	43.0657	13.7055	0.013759	0.715371	ENSG00000204301	NOTCH4	6	32162620	32191844	ENSMMUG00000018461	NOTCH4	4	137281522	137310354	0.667041	0.046604
cg23760574	TNXB	39054	6	32038097	16.7393	5.90192	0.0219384	0.748965	ENSG00000204301	NOTCH4	6	32162620	32191844	ENSMMUG00000018461	NOTCH4	4	137281522	137310354	0.667041	0.046604
cg01188191	TNXB	29802	6	32047349	15.6437	4.29315	0.00655204	0.630967	ENSG00000204301	NOTCH4	6	32162620	32191844	ENSMMUG00000018461	NOTCH4	4	137281522	137310354	0.667041	0.046604
cg22402769	TNXB	20433	6	32056718	35.898	14.7614	0.0410808	0.784367	ENSG00000204301	NOTCH4	6	32162620	32191844	ENSMMUG00000018461	NOTCH4	4	137281522	137310354	0.667041	0.046604
cg00872984	TNXB	13160	6	32063991	7.32672	2.71104	0.0269673	0.760693	ENSG00000204301	NOTCH4	6	32162620	32191844	ENSMMUG00000018461	NOTCH4	4	137281522	137310354	0.667041	0.046604
cg27387193	TNXB	13119	6	32064032	5.22978	2.22689	0.0467933	0.789642	ENSG00000204301	NOTCH4	6	32162620	32191844	ENSMMUG00000018461	NOTCH4	4	137281522	137310354	0.667041	0.046604
cg13400512	TNXB	12573	6	32064578	2.89148	0.941595	0.0153286	0.719588	ENSG00000204301	NOTCH4	6	32162620	32191844	ENSMMUG00000018461	NOTCH4	4	137281522	137310354	0.667041	0.046604
cg15014577	TNXB	12366	6	32064785	13.2246	3.61267	0.00639537	0.63081	ENSG00000204301	NOTCH4	6	32162620	32191844	ENSMMUG00000018461	NOTCH4	4	137281522	137310354	0.667041	0.046604
cg14620908	TNXB	6857	6	32078614	-5.98014	2.14511	0.0236381	0.748965	ENSG00000204301	NOTCH4	6	32162620	32191844	ENSMMUG00000018461	NOTCH4	4	137281522	137310354	0.667041	0.046604
cg13654183	TNXB	6847	6	32078624	-7.23562	1.54917	0.00160116	0.528423	ENSG00000204301	NOTCH4	6	32162620	32191844	ENSMMUG00000018461	NOTCH4	4	137281522	137310354	0.667041	0.046604
cg06609004	ATF6B	1772	6	32086425	-8.72032	2.86022	0.0158492	0.719787	ENSG00000204301	NOTCH4	6	32162620	32191844	ENSMMUG00000018461	NOTCH4	4	137281522	137310354	0.667041	0.046604
cg04962282	ATF6B	1418	6	32086779	-115.616	47.801	0.0419353	0.784367	ENSG00000204301	NOTCH4	6	32162620	32191844	ENSMMUG00000018461	NOTCH4	4	137281522	137310354	0.667041	0.046604
cg07986385	ATF6B	1340	6	32086857	-38.8568	10.7387	0.0067984	0.63507	ENSG00000204301	NOTCH4	6	32162620	32191844	ENSMMUG00000018461	NOTCH4	4	137281522	137310354	0.667041	0.046604
cg19004565	ATF6B	1304	6	32086893	-28.6238	8.28366	0.00862531	0.655	ENSG00000204301	NOTCH4	6	32162620	32191844	ENSMMUG00000018461	NOTCH4	4	137281522	137310354	0.667041	0.046604
cg12735838	ATF6B	1295	6	32086902	-12.7298	4.87807	0.0311499	0.766557	ENSG00000204301	NOTCH4	6	32162620	32191844	ENSMMUG00000018461	NOTCH4	4	137281522	137310354	0.667041	0.046604
cg15018359	ATF6B	547	6	32095470	3.14912	1.30957	0.042861	0.784367	ENSG00000204301	NOTCH4	6	32162620	32191844	ENSMMUG00000018461	NOTCH4	4	137281522	137310354	0.667041	0.046604
cg07617339	ATF6B	397	6	32095620	2.77394	1.00741	0.0249219	0.749078	ENSG00000204301	NOTCH4	6	32162620	32191844	ENSMMUG00000018461	NOTCH4	4	137281522	137310354	0.667041	0.046604
cg26349166	ATF6B	38	6	32095979	5.26371	2.14089	0.0394009	0.778237	ENSG00000204301	NOTCH4	6	32162620	32191844	ENSMMUG00000018461	NOTCH4	4	137281522	137310354	0.667041	0.046604
cg20856510	ATF6B	195	6	32096213	4.00863	1.56844	0.0338668	0.769691	ENSG00000204301	NOTCH4	6	32162620	32191844	ENSMMUG00000018461	NOTCH4	4	137281522	137310354	0.667041	0.046604
cg21548749	FKBPL	1543	6	32096524	10.8798	3.02574	0.00702538	0.63701	ENSG00000204301	NOTCH4	6	32162620	32191844	ENSMMUG00000018461	NOTCH4	4	137281522	137310354	0.667041	0.046604
cg14762784	FKBPL	1351	6	32096716	8.48635	2.75935	0.0152208	0.719588	ENSG00000204301	NOTCH4	6	32162620	32191844	ENSMMUG00000018461	NOTCH4	4	137281522	137310354	0.667041	0.046604
cg04322718	FKBPL	1339	6	32096728	7.14742	2.10063	0.00932571	0.665792	ENSG00000204301	NOTCH4	6	32162620	32191844	ENSMMUG00000018461	NOTCH4	4	137281522	137310354	0.667041	0.046604
cg14300347	FKBPL	1222	6	32096845	7.97658	2.46792	0.0120189	0.690983	ENSG00000204301	NOTCH4	6	32162620	32191844	ENSMMUG00000018461	NOTCH4	4	137281522	137310354	0.667041	0.046604
cg02390267	FKBPL	1213	6	32096854	6.16626	2.17076	0.0217919	0.748965	ENSG00000204301	NOTCH4	6	32162620	32191844	ENSMMUG00000018461	NOTCH4	4	137281522	137310354	0.667041	0.046604
cg04941987	FKBPL	1201	6	32096866	6.10054	2.11351	0.0203095	0.739569	ENSG00000204301	NOTCH4	6	32162620	32191844	ENSMMUG00000018461	NOTCH4	4	137281522	137310354	0.667041	0.046604
cg10947457	FKBPL	1122	6	32096945	32.1322	10.8535	0.0181308	0.726332	ENSG00000204301	NOTCH4	6	32162620	32191844	ENSMMUG00000018461	NOTCH4	4	137281522	137310354	0.667041	0.046604
cg12942597	FKBPL	920	6	32097147	9.8282	3.49789	0.0228519	0.748965	ENSG00000204301	NOTCH4	6	32162620	32191844	ENSMMUG00000018461	NOTCH4	4	137281522	137310354	0.667041	0.046604
cg11580844	FKBPL	909	6	32097158	8.35033	2.62611	0.0130027	0.706828	ENSG00000204301	NOTCH4	6	32162620	32191844	ENSMMUG00000018461	NOTCH4	4	137281522	137310354	0.667041	0.046604
cg26539631	FKBPL	628	6	32097439	5.65924	2.04228	0.0242579	0.748965	ENSG00000204301	NOTCH4	6	32162620	32191844	ENSMMUG00000018461	NOTCH4	4	137281522	137310354	0.667041	0.046604
cg18749555	FKBPL	214	6	32097853	22.4244	7.8091	0.0207787	0.743488	ENSG00000204301	NOTCH4	6	32162620	32191844	ENSMMUG00000018461	NOTCH4	4	137281522	137310354	0.667041	0.046604
cg05714552	PRRT1	2565	6	32118295	-15.5526	6.63103	0.0470158	0.791209	ENSG00000204301	NOTCH4	6	32162620	32191844	ENSMMUG00000018461	NOTCH4	4	137281522	137310354	0.667041	0.046604
cg12602633	PRRT1	1169	6	32119691	12.5449	2.6639	0.00152321	0.528423	ENSG00000204301	NOTCH4	6	32162620	32191844	ENSMMUG00000018461	NOTCH4	4	137281522	137310354	0.667041	0.046604
cg23470939	PPT2	245	6	32121475	75.0889	17.1886	0.00238515	0.55626	ENSG00000204301	NOTCH4	6	32162620	32191844	ENSMMUG00000018461	NOTCH4	4	137281522	137310354	0.667041	0.046604
cg24283914	PPT2	806	6	32122583	57.6157	21.7017	0.0290348	0.762326	ENSG00000204301	NOTCH4	6	32162620	32191844	ENSMMUG00000018461	NOTCH4	4	137281522	137310354	0.667041	0.046604
cg13705888	PPT2-EGFL8	9459	6	32131722	-28.579	10.3837	0.0249708	0.749078	ENSG00000204301	NOTCH4	6	32162620	32191844	ENSMMUG00000018461	NOTCH4	4	137281522	137310354	0.667041	0.046604
cg18699916	EGFL8	1546	6	32133929	33.2288	12.609	0.0299302	0.763295	ENSG00000204301	NOTCH4	6	32162620	32191844	ENSMMUG00000018461	NOTCH4	4	137281522	137310354	0.667041	0.046604
cg08472222	EGFL8	2812	6	32135195	-229.729	53.8196	0.0027297	0.562083	ENSG00000204301	NOTCH4	6	32162620	32191844	ENSMMUG00000018461	NOTCH4	4	137281522	137310354	0.667041	0.046604
cg02260340	AGPAT1	135	6	32145753	231.933	71.817	0.012066	0.690983	ENSG00000204301	NOTCH4	6	32162620	32191844	ENSMMUG00000018461	NOTCH4	4	137281522	137310354	0.667041	0.046604
cg24425483	RNF5	32	6	32146195	39.5263	16.3933	0.0424339	0.784367	ENSG00000204301	NOTCH4	6	32162620	32191844	ENSMMUG00000018461	NOTCH4	4	137281522	137310354	0.667041	0.046604
cg11995506	RNF5	69	6	32146232	-27.6566	8.77371	0.0135532	0.715371	ENSG00000204301	NOTCH4	6	32162620	32191844	ENSMMUG00000018461	NOTCH4	4	137281522	137310354	0.667041	0.046604
cg21358678	RNF5	1728	6	32147891	-87.7383	28.1863	0.0143845	0.718665	ENSG00000204301	NOTCH4	6	32162620	32191844	ENSMMUG00000018461	NOTCH4	4	137281522	137310354	0.667041	0.046604
cg01285072	RNF5	2780	6	32148943	-43.2711	14.4951	0.0174605	0.726332	ENSG00000204301	NOTCH4	6	32162620	32191844	ENSMMUG00000018461	NOTCH4	4	137281522	137310354	0.667041	0.046604
cg26505596	RNF5	4493	6	32150656	-14.2466	5.67171	0.0362654	0.777345	ENSG00000204301	NOTCH4	6	32162620	32191844	ENSMMUG00000018461	NOTCH4	4	137281522	137310354	0.667041	0.046604
cg19376664	PBX2	4388	6	32153575	2.72079	0.73467	0.00601295	0.617796	ENSG00000204301	NOTCH4	6	32162620	32191844	ENSMMUG00000018461	NOTCH4	4	137281522	137310354	0.667041	0.046604
cg09001226	PBX2	2881	6	32155082	-18.1407	4.7806	0.00527677	0.598689	ENSG00000204301	NOTCH4	6	32162620	32191844	ENSMMUG00000018461	NOTCH4	4	137281522	137310354	0.667041	0.046604
cg16602460	PBX2	1892	6	32156071	-20.2163	7.19391	0.0228363	0.748965	ENSG00000204301	NOTCH4	6	32162620	32191844	ENSMMUG00000018461	NOTCH4	4	137281522	137310354	0.667041	0.046604
cg09784502	PBX2	259	6	32158223	55.4493	22.1645	0.0368436	0.777345	ENSG00000204301	NOTCH4	6	32162620	32191844	ENSMMUG00000018461	NOTCH4	4	137281522	137310354	0.667041	0.046604
cg08183114	GPSM3	5016	6	32158284	-45.6133	12.8094	0.00739064	0.638537	ENSG00000204301	NOTCH4	6	32162620	32191844	ENSMMUG00000018461	NOTCH4	4	137281522	137310354	0.667041	0.046604
cg14044426	GPSM3	2502	6	32160798	-12.2626	3.62567	0.00961096	0.668439	ENSG00000204301	NOTCH4	6	32162620	32191844	ENSMMUG00000018461	NOTCH4	4	137281522	137310354	0.667041	0.046604
cg19256906	NOTCH4	4377	6	32187467	25.9966	10.0241	0.0319431	0.766747	ENSG00000204301	NOTCH4	6	32162620	32191844	ENSMMUG00000018461	NOTCH4	4	137281522	137310354	0.667041	0.046604
cg27353721	NOTCH4	10903	6	32202748	-17.3574	7.42638	0.0476193	0.791209	ENSG00000204301	NOTCH4	6	32162620	32191844	ENSMMUG00000018461	NOTCH4	4	137281522	137310354	0.667041	0.046604
cg22863148	TSBP1	102	6	32339554	5.26233	2.12906	0.0386098	0.778237	ENSG00000204301	NOTCH4	6	32162620	32191844	ENSMMUG00000018461	NOTCH4	4	137281522	137310354	0.667041	0.046604
cg02028402	HLA-DRA	2719	6	32410339	-8.98297	3.74021	0.0430604	0.784367	ENSG00000204301	NOTCH4	6	32162620	32191844	ENSMMUG00000018461	NOTCH4	4	137281522	137310354	0.667041	0.046604
cg17799090	MDGA1	85202	6	37580564	31.8419	13.0205	0.0402172	0.780289	ENSG00000198937	CCDC167	6	37450696	37467698	ENSMMUG00000011575	CCDC167	4	131915972	131937534	1.85532	0.00626115
cg26129310	MDGA1	1315	6	37664451	16.856	6.2566	0.0273222	0.760693	ENSG00000198937	CCDC167	6	37450696	37467698	ENSMMUG00000011575	CCDC167	4	131915972	131937534	1.85532	0.00626115
cg09185650	MDGA1	1228	6	37664538	41.5689	13.9834	0.017797	0.726332	ENSG00000198937	CCDC167	6	37450696	37467698	ENSMMUG00000011575	CCDC167	4	131915972	131937534	1.85532	0.00626115
cg11171825	PEX6	7952	6	42939029	4.57168	1.93091	0.0454143	0.786097	ENSG00000112624	GLTSCR1L	6	42749765	42836298	ENSMMUG00000029682	BICRAL	4	126478209	126567616	-0.376881	0.0335206
cg27397625	PPP2R5D	60	6	42952298	-19.1417	5.82636	0.0110986	0.680357	ENSG00000112624	GLTSCR1L	6	42749765	42836298	ENSMMUG00000029682	BICRAL	4	126478209	126567616	-0.376881	0.0335206
cg11000707	KLHDC3	4198	6	42988922	6.95087	2.98809	0.0484489	0.791209	ENSG00000112624	GLTSCR1L	6	42749765	42836298	ENSMMUG00000029682	BICRAL	4	126478209	126567616	-0.376881	0.0335206
cg14406043	C6orf223	56996	6	44025334	-7.71917	2.99875	0.0329154	0.769691	ENSG00000096384	HSP90AB1	6	44214824	44221620	ENSMMUG00000022685	SLC29A1	4	125076091	125111291	0.422337	0.0335963
cg23172293	MRPL14	10812	6	44084379	13.0128	5.29888	0.0395789	0.778237	ENSG00000096384	HSP90AB1	6	44214824	44221620	ENSMMUG00000022685	SLC29A1	4	125076091	125111291	0.422337	0.0335963
cg26371345	MRPL14	4443	6	44090748	-8.90184	3.31223	0.0276005	0.760693	ENSG00000096384	HSP90AB1	6	44214824	44221620	ENSMMUG00000022685	SLC29A1	4	125076091	125111291	0.422337	0.0335963
cg11947985	TMEM63B	12222	6	44119668	-3.97026	1.66935	0.0446619	0.785524	ENSG00000096384	HSP90AB1	6	44214824	44221620	ENSMMUG00000022685	SLC29A1	4	125076091	125111291	0.422337	0.0335963
cg15611112	CAPN11	473	6	44126075	-17.7267	4.38134	0.00370491	0.578648	ENSG00000096384	HSP90AB1	6	44214824	44221620	ENSMMUG00000022685	SLC29A1	4	125076091	125111291	0.422337	0.0335963
cg01330316	CLIC5	69344	6	45914282	-3.91187	1.49394	0.030722	0.76621	ENSG00000001561	ENPP4	6	46097730	46114436	ENSMMUG00000042260	ENPP4	4	123230347	123244293	0.511807	0.0249613
cg06665622	RCAN2	166233	6	46293571	-10.3444	3.19098	0.0118463	0.690295	ENSG00000001561	ENPP4	6	46097730	46114436	ENSMMUG00000042260	ENPP4	4	123230347	123244293	0.511807	0.0249613
cg05425535	HTR1B	227328	6	78400449	40.7091	12.0129	0.00951691	0.667634	ENSG00000135312	HTR1B	6	78171948	78173490	ENSMMUG00000015717	HTR1B	4	95571211	95572383	3.29191	0.0464849
cg18967401	NT5E	77156	6	86082146	-35.7838	9.20536	0.00462698	0.583328	ENSG00000135318	NT5E	6	86159809	86205500	ENSMMUG00000005442	NT5E	4	87754977	87798669	-2.77205	0.02609
cg04679564	SNX14	60181	6	86243448	145.662	37.5799	0.00470088	0.583971	ENSG00000135318	NT5E	6	86159809	86205500	ENSMMUG00000005442	NT5E	4	87754977	87798669	-2.77205	0.02609
cg22585167	MANEA	219	6	96025154	-18.7781	8.10948	0.0492588	0.791209	ENSG00000172469	MANEA	6	96025419	96057333	ENSMMUG00000012202	MANEA	4	77755863	77786307	0.548474	0.00767358
cg04719120	MANEA	35	6	96025338	-5.4751	1.38312	0.00418578	0.578648	ENSG00000172469	MANEA	6	96025419	96057333	ENSMMUG00000012202	MANEA	4	77755863	77786307	0.548474	0.00767358
cg11736629	GPR6	1976	6	110298322	24.7792	8.32312	0.0176772	0.726332	ENSG00000112290	WASF1	6	110421022	110501207	ENSMMUG00000014764	WASF1	4	13726354	13799869	0.752271	0.0139848
cg11671688	GPR6	758	6	110301075	3.16445	1.24538	0.0346599	0.773549	ENSG00000112290	WASF1	6	110421022	110501207	ENSMMUG00000014764	WASF1	4	13726354	13799869	0.752271	0.0139848
cg20202874	WASF1	78351	6	110422856	50.9041	17.1171	0.0177657	0.726332	ENSG00000112290	WASF1	6	110421022	110501207	ENSMMUG00000014764	WASF1	4	13726354	13799869	0.752271	0.0139848
cg14322427	CDC40	118	6	110501706	24.6178	9.03453	0.0260522	0.754901	ENSG00000112290	WASF1	6	110421022	110501207	ENSMMUG00000014764	WASF1	4	13726354	13799869	0.752271	0.0139848
cg17796499	METTL24	155245	6	110576694	12.144	2.49797	0.0012533	0.528423	ENSG00000112290	WASF1	6	110421022	110501207	ENSMMUG00000014764	WASF1	4	13726354	13799869	0.752271	0.0139848
cg04918982	EPB41L2	1402	6	131383060	10.1954	2.98869	0.0092049	0.665792	ENSG00000118507	AKAP7	6	131456806	131604675	ENSMMUG00000000577	AKAP7	4	34708179	34865156	-0.789432	0.000723597
cg27355739	EPB41L2	1030	6	131383432	25.1953	10.3025	0.0402148	0.780289	ENSG00000118507	AKAP7	6	131456806	131604675	ENSMMUG00000000577	AKAP7	4	34708179	34865156	-0.789432	0.000723597
cg00140910	EPB41L2	92	6	131384370	38.7586	14.3853	0.027313	0.760693	ENSG00000118507	AKAP7	6	131456806	131604675	ENSMMUG00000000577	AKAP7	4	34708179	34865156	-0.789432	0.000723597
cg19019911	EPB41L2	281	6	131384744	21.3146	8.75524	0.0409141	0.783836	ENSG00000118507	AKAP7	6	131456806	131604675	ENSMMUG00000000577	AKAP7	4	34708179	34865156	-0.789432	0.000723597
cg12606694	AKAP7	64169	6	131520996	25.3849	4.17578	0.00029623	0.460957	ENSG00000118507	AKAP7	6	131456806	131604675	ENSMMUG00000000577	AKAP7	4	34708179	34865156	-0.789432	0.000723597
cg05915981	AKAP7	369	6	131571669	16.6184	3.53427	0.00153733	0.528423	ENSG00000118507	AKAP7	6	131456806	131604675	ENSMMUG00000000577	AKAP7	4	34708179	34865156	-0.789432	0.000723597
cg20533403	AKAP7	118549	6	131689849	-12.3787	4.9245	0.0361616	0.777345	ENSG00000118507	AKAP7	6	131456806	131604675	ENSMMUG00000000577	AKAP7	4	34708179	34865156	-0.789432	0.000723597
cg13603171	MOXD1	499	6	132723164	-35.8409	11.5744	0.0147424	0.718665	ENSG00000079931	MOXD1	6	132617194	132722684	ENSMMUG00000004996	MOXD1	4	35835698	35957266	2.65107	0.0166231
cg26998693	STX7	252	6	132834590	50.9527	19.4237	0.0304973	0.764969	ENSG00000079931	MOXD1	6	132617194	132722684	ENSMMUG00000004996	MOXD1	4	35835698	35957266	2.65107	0.0166231
cg25606746	PHACTR2	13314	6	143916003	-14.5217	5.47147	0.0290714	0.762326	ENSG00000001036	FUCA2	6	143815948	143832827	ENSMMUG00000005366	FUCA2	4	47272461	47290159	-0.40286	0.0476972
cg27061249	PHACTR2	69634	6	143998952	-10.6274	4.51656	0.0464643	0.788487	ENSG00000001036	FUCA2	6	143815948	143832827	ENSMMUG00000005366	FUCA2	4	47272461	47290159	-0.40286	0.0476972
cg20865323	PHACTR2	563	6	143999666	69.605	27.1083	0.0332483	0.769691	ENSG00000001036	FUCA2	6	143815948	143832827	ENSMMUG00000005366	FUCA2	4	47272461	47290159	-0.40286	0.0476972
cg13593676	SASH1	112875	6	148776605	-10.3994	3.9933	0.0314116	0.766557	ENSG00000111961	SASH1	6	148593440	148873186	ENSMMUG00000004893	SASH1	4	54197211	54482294	0.674271	0.0493237
cg01477516	AKAP12	78212	6	151639722	22.7051	8.8565	0.0334557	0.769691	ENSG00000131016	AKAP12	6	151561134	151679692	ENSMMUG00000023265	AKAP12	4	57301116	57525101	0.86294	0.0320047
cg03446012	AKAP12	85091	6	151646601	29.751	12.474	0.0441967	0.785524	ENSG00000131016	AKAP12	6	151561134	151679692	ENSMMUG00000023265	AKAP12	4	57301116	57525101	0.86294	0.0320047
cg18245460	AKAP12	85141	6	151646651	78.0469	13.8304	0.000485262	0.460957	ENSG00000131016	AKAP12	6	151561134	151679692	ENSMMUG00000023265	AKAP12	4	57301116	57525101	0.86294	0.0320047
cg06019170	AKAP12	290	6	151646957	36.1225	12.4854	0.0201005	0.739266	ENSG00000131016	AKAP12	6	151561134	151679692	ENSMMUG00000023265	AKAP12	4	57301116	57525101	0.86294	0.0320047
cg21127668	PCGF3	120	4	699694	10.1608	3.24092	0.0139069	0.717622	ENSG00000168993	CPLX1	4	778745	819986	ENSMMUG00000005016	CPLX1	5	789092	833666	-0.947285	0.000187436
cg22804935	TMEM175	59	4	926322	30.3568	9.63495	0.0135842	0.715371	ENSG00000168993	CPLX1	4	778745	819986	ENSMMUG00000005016	CPLX1	5	789092	833666	-0.947285	0.000187436
cg23092788	TMEM175	23295	4	949558	9.55572	3.59486	0.0288878	0.762069	ENSG00000168993	CPLX1	4	778745	819986	ENSMMUG00000005016	CPLX1	5	789092	833666	-0.947285	0.000187436
cg15707747	SLC26A1	6796	4	980428	71.3964	23.7427	0.0168882	0.72407	ENSG00000168993	CPLX1	4	778745	819986	ENSMMUG00000005016	CPLX1	5	789092	833666	-0.947285	0.000187436
cg15058036	IDUA	1657	4	982443	77.2063	27.6983	0.0236528	0.748965	ENSG00000168993	CPLX1	4	778745	819986	ENSMMUG00000005016	CPLX1	5	789092	833666	-0.947285	0.000187436
cg23116115	FGFRL1	679	4	1004261	14.6867	5.83957	0.0360873	0.777345	ENSG00000168993	CPLX1	4	778745	819986	ENSMMUG00000005016	CPLX1	5	789092	833666	-0.947285	0.000187436
cg05875617	CRMP1	1453	4	5893332	22.7416	9.37339	0.0414477	0.784367	ENSG00000072832	CRMP1	4	5749811	5894785	ENSMMUG00000019563	CRMP1	5	7080854	7153111	1.44997	0.0459826
cg13755419	SLC2A9	101306	4	9940566	-57.2542	19.3877	0.0183378	0.726332	ENSG00000169676	DRD5	4	9783258	9785632	ENSMMUG00000002783	DRD5	5	8825768	8828176	-4.58842	0.0485539
cg15380744	FGFBP2	47	4	15964812	25.9425	10.884	0.0442999	0.785524	ENSG00000007062	PROM1	4	15964699	16086001	ENSMMUG00000008164	PROM1	5	14968139	15120630	1.69691	0.0227947
cg20576510	PROM1	417	4	16077324	41.5327	10.2227	0.00361933	0.578648	ENSG00000007062	PROM1	4	15964699	16086001	ENSMMUG00000008164	PROM1	5	14968139	15120630	1.69691	0.0227947
cg24688065	PROM1	2151	4	16087775	35.4163	14.1407	0.0366804	0.777345	ENSG00000007062	PROM1	4	15964699	16086001	ENSMMUG00000008164	PROM1	5	14968139	15120630	1.69691	0.0227947
cg11517378	SERINC2	609	1	31886573	110.916	27.3445	0.00365237	0.578648	ENSG00000162517	PEF1	1	32095463	32110497	ENSMMUG00000052381	-	5	47782970	47784261	-1.30222	0.0101704
cg03599134	TINAGL1	1520	1	32045267	33.4007	10.3734	0.0122421	0.692475	ENSG00000162517	PEF1	1	32095463	32110497	ENSMMUG00000052381	-	5	47782970	47784261	-1.30222	0.0101704
cg25230736	PEF1	9937	1	32100901	80.438	30.264	0.0289004	0.762069	ENSG00000162517	PEF1	1	32095463	32110497	ENSMMUG00000052381	-	5	47782970	47784261	-1.30222	0.0101704
cg17738504	ADGRB2	17477	1	32204939	-22.36	6.65172	0.00990927	0.668824	ENSG00000162517	PEF1	1	32095463	32110497	ENSMMUG00000052381	-	5	47782970	47784261	-1.30222	0.0101704
cg07826326	ADGRB2	265	1	32222151	20.1011	7.66202	0.0304857	0.764969	ENSG00000162517	PEF1	1	32095463	32110497	ENSMMUG00000052381	-	5	47782970	47784261	-1.30222	0.0101704
cg08042273	ADGRB2	4665	1	32224983	55.724	15.5412	0.00713026	0.63701	ENSG00000162517	PEF1	1	32095463	32110497	ENSMMUG00000052381	-	5	47782970	47784261	-1.30222	0.0101704
cg10773309	ADGRB2	237	1	32229411	41.2495	16.4778	0.0367508	0.777345	ENSG00000162517	PEF1	1	32095463	32110497	ENSMMUG00000052381	-	5	47782970	47784261	-1.30222	0.0101704
cg25094149	SPOCD1	27674	1	32253906	-22.8258	8.75589	0.0312802	0.766557	ENSG00000162517	PEF1	1	32095463	32110497	ENSMMUG00000052381	-	5	47782970	47784261	-1.30222	0.0101704
cg22241045	LNX1	154771	4	54363911	-5.76545	2.41521	0.0440522	0.785524	ENSG00000072201	LNX1	4	54325468	54567572	ENSMMUG00000017401	LNX1	5	80054831	80188517	-0.537455	0.0432334
cg19850370	SLC4A4	333	4	72205104	39.528	14.0758	0.022906	0.748965	ENSG00000080493	SLC4A4	4	72053003	72437804	ENSMMUG00000016029	SLC4A4	5	62230375	62718717	3.39811	0.000126903
cg11646192	EREG	245	4	75230615	-5.67261	2.31237	0.0397407	0.77899	ENSG00000109321	AREG	4	75310851	75320726	ENSMMUG00000002314	AREG	5	59250363	59261492	0.551692	0.0362063
cg04397429	PTPN13	49	4	87515419	-234.294	72.1463	0.0117453	0.689128	ENSG00000163629	PTPN13	4	87515468	87736324	ENSMMUG00000003726	PTPN13	5	85030197	85214133	1.56515	0.039314
cg05357941	PTPN13	1273	4	87516742	-16.0698	4.99225	0.0122584	0.692475	ENSG00000163629	PTPN13	4	87515468	87736324	ENSMMUG00000003726	PTPN13	5	85030197	85214133	1.56515	0.039314
cg04750593	METAP1	213	4	99917002	-95.5334	40.2909	0.0451695	0.786097	ENSG00000197894	ADH5	4	99992132	100009952	ENSMMUG00000003552	ADH5	5	97365137	97402838	0.526654	0.0192664
cg16022748	RPL34-AS1	21	4	109541635	-395.65	146.491	0.0270388	0.760693	ENSG00000164089	ETNPPL	4	109663196	109684210	ENSMMUG00000011903	ETNPPL	5	107074925	107116916	-3.4755	0.0443069
cg16195150	COL25A1	421569	4	109802230	25.2362	10.5191	0.0432389	0.784844	ENSG00000164089	ETNPPL	4	109663196	109684210	ENSMMUG00000011903	ETNPPL	5	107074925	107116916	-3.4755	0.0443069
cg06858167	COL25A1	402464	4	109821335	27.0507	7.41606	0.00651714	0.630967	ENSG00000164089	ETNPPL	4	109663196	109684210	ENSMMUG00000011903	ETNPPL	5	107074925	107116916	-3.4755	0.0443069
cg24974477	PLA2G12A	585	4	110650657	81.7888	31.5947	0.0321785	0.766818	ENSG00000005059	CCDC109B	4	110481361	110609874	ENSMMUG00000052933	MCUB	5	107939342	108045725	0.529268	0.0237432
cg22606559	LRIT3	106	4	110769447	55.1884	14.2389	0.00470206	0.583971	ENSG00000138798	EGF	4	110834040	110933422	ENSMMUG00000010043	EGF	5	108263153	108381988	1.76681	0.0278132
cg26491574	PIFO	49	1	111889146	107.18	44.4689	0.0424939	0.784367	ENSG00000116459	ATP5F1	1	111991486	112005395	ENSMMUG00000014173	-	5	142182750	142183520	-1.33187	0.0423193
cg16252973	PIFO	5725	1	111894921	77.3682	23.0342	0.00994893	0.668824	ENSG00000116459	ATP5F1	1	111991486	112005395	ENSMMUG00000014173	-	5	142182750	142183520	-1.33187	0.0423193
cg25674286	ADORA3	59682	1	112046915	-19.9692	7.27812	0.0253029	0.750401	ENSG00000116459	ATP5F1	1	111991486	112005395	ENSMMUG00000014173	-	5	142182750	142183520	-1.33187	0.0423193
cg00035969	RAP1A	74041	1	112159097	25.0269	9.5163	0.0301831	0.763295	ENSG00000116459	ATP5F1	1	111991486	112005395	ENSMMUG00000014173	-	5	142182750	142183520	-1.33187	0.0423193
cg09120456	PDE5A	241	4	120549740	-83.9957	31.6001	0.0288912	0.762069	ENSG00000138735	PDE5A	4	120415550	120550146	ENSMMUG00000007305	PDE5A	5	117387219	117515805	-0.534118	0.0466881
cg10453550	PRDM5	80691	4	121763322	4.61011	1.59966	0.0204509	0.740685	ENSG00000173376	NDNF	4	121956768	121994176	ENSMMUG00000013989	NDNF	5	118875354	118911175	0.918331	7.95e-05
cg04064241	NDNF	26784	4	121966889	8.51233	3.58587	0.0449751	0.785648	ENSG00000173376	NDNF	4	121956768	121994176	ENSMMUG00000013989	NDNF	5	118875354	118911175	0.918331	7.95e-05
cg07290190	NDNF	917	4	121992756	-81.6163	30.8635	0.0295097	0.763295	ENSG00000173376	NDNF	4	121956768	121994176	ENSMMUG00000013989	NDNF	5	118875354	118911175	0.918331	7.95e-05
cg03960055	TNIP3	77308	4	122071313	14.0403	3.7549	0.00571196	0.61546	ENSG00000173376	NDNF	4	121956768	121994176	ENSMMUG00000013989	NDNF	5	118875354	118911175	0.918331	7.95e-05
cg03248158	ANXA5	14770	4	122632918	685.111	236.823	0.0201089	0.739266	ENSG00000138741	TRPC3	4	122800182	122872909	ENSMMUG00000009820	TRPC3	5	119719057	119790405	-1.77135	0.00913349
cg02043159	PCDH10	235	4	134070235	-10.0479	4.15671	0.0420284	0.784367	ENSG00000138650	PCDH10	4	134070470	134129356	ENSMMUG00000023149	PCDH10	5	130897833	130937924	-0.936026	0.00462297
cg01408654	PCDH10	33	4	134070437	-16.4067	6.88662	0.0443791	0.785524	ENSG00000138650	PCDH10	4	134070470	134129356	ENSMMUG00000023149	PCDH10	5	130897833	130937924	-0.936026	0.00462297
cg05287690	FBXW7	49	4	153456344	35.9439	11.611	0.0147622	0.718665	ENSG00000109670	FBXW7	4	153242410	153457253	ENSMMUG00000020330	FBXW7	5	149971006	150180547	0.487265	0.00277861
cg15975171	SLC6A18	14216	5	1239687	-4.10954	1.045	0.00434104	0.578648	ENSG00000049656	CLPTM1L	5	1317859	1345214	ENSMMUG00000005193	CLPTM1L	6	1267802	1291183	-0.36446	0.0329215
cg16168424	TERT	41253	5	1253909	-5.59019	1.53163	0.00649588	0.630967	ENSG00000049656	CLPTM1L	5	1317859	1345214	ENSMMUG00000005193	CLPTM1L	6	1267802	1291183	-0.36446	0.0329215
cg21487099	SLC6A19	102	5	1201608	-2.22533	0.667234	0.0103051	0.668824	ENSG00000049656	CLPTM1L	5	1317859	1345214	ENSMMUG00000005193	CLPTM1L	6	1267802	1291183	-0.36446	0.0329215
cg19524810	SLC12A7	55	5	1112228	8.879	2.75129	0.0121074	0.690983	ENSG00000049656	CLPTM1L	5	1317859	1345214	ENSMMUG00000005193	CLPTM1L	6	1267802	1291183	-0.36446	0.0329215
cg02389859	SLC6A19	19	5	1201691	-5.29337	1.72708	0.0154664	0.719588	ENSG00000049656	CLPTM1L	5	1317859	1345214	ENSMMUG00000005193	CLPTM1L	6	1267802	1291183	-0.36446	0.0329215
cg13202751	SLC6A3	899	5	1446443	-4.30765	1.4894	0.0201308	0.739266	ENSG00000049656	CLPTM1L	5	1317859	1345214	ENSMMUG00000005193	CLPTM1L	6	1267802	1291183	-0.36446	0.0329215
cg04135385	SLC6A19	17205	5	1218916	-3.21575	1.12896	0.0215312	0.748965	ENSG00000049656	CLPTM1L	5	1317859	1345214	ENSMMUG00000005193	CLPTM1L	6	1267802	1291183	-0.36446	0.0329215
cg25664813	SLC12A7	10950	5	1123123	-3.12277	1.1084	0.0225854	0.748965	ENSG00000049656	CLPTM1L	5	1317859	1345214	ENSMMUG00000005193	CLPTM1L	6	1267802	1291183	-0.36446	0.0329215
cg04309194	SLC6A19	81	5	1201629	-4.50226	1.64662	0.0256769	0.75323	ENSG00000049656	CLPTM1L	5	1317859	1345214	ENSMMUG00000005193	CLPTM1L	6	1267802	1291183	-0.36446	0.0329215
cg22632352	SLC6A19	9480	5	1211191	-3.59012	1.36751	0.0303994	0.764969	ENSG00000049656	CLPTM1L	5	1317859	1345214	ENSMMUG00000005193	CLPTM1L	6	1267802	1291183	-0.36446	0.0329215
cg17650028	SLC6A19	2	5	1201713	-4.43318	1.72776	0.0333421	0.769691	ENSG00000049656	CLPTM1L	5	1317859	1345214	ENSMMUG00000005193	CLPTM1L	6	1267802	1291183	-0.36446	0.0329215
cg21492882	SLC6A19	71	5	1201639	-2.98673	1.19533	0.0370189	0.777345	ENSG00000049656	CLPTM1L	5	1317859	1345214	ENSMMUG00000005193	CLPTM1L	6	1267802	1291183	-0.36446	0.0329215
cg04210284	SLC6A3	17	5	1445561	-3.04929	1.28087	0.0445015	0.785524	ENSG00000049656	CLPTM1L	5	1317859	1345214	ENSMMUG00000005193	CLPTM1L	6	1267802	1291183	-0.36446	0.0329215
cg02064402	SLC6A18	248	5	1225719	4.75888	2.02469	0.0466504	0.789146	ENSG00000049656	CLPTM1L	5	1317859	1345214	ENSMMUG00000005193	CLPTM1L	6	1267802	1291183	-0.36446	0.0329215
cg20250239	MIR4277	7220	5	1701763	18.3049	6.53053	0.0230916	0.748965	ENSG00000113430	IRX4	5	1877541	1887350	ENSMMUG00000004220	IRX4	6	1842486	1847739	-1.09741	0.0375295
cg04269602	NDUFS6	41580	5	1843077	22.7574	8.7147	0.0310633	0.766557	ENSG00000113430	IRX4	5	1877541	1887350	ENSMMUG00000004220	IRX4	6	1842486	1847739	-1.09741	0.0375295
cg19021412	IRX4	215963	5	2103257	18.0762	7.20708	0.0364775	0.777345	ENSG00000113430	IRX4	5	1877541	1887350	ENSMMUG00000004220	IRX4	6	1842486	1847739	-1.09741	0.0375295
cg10595952	IRX4	209758	5	2097052	16.6688	6.7585	0.0389318	0.778237	ENSG00000113430	IRX4	5	1877541	1887350	ENSMMUG00000004220	IRX4	6	1842486	1847739	-1.09741	0.0375295
cg09672187	IRX4	1926	5	1885367	17.0301	6.99894	0.0409948	0.784367	ENSG00000113430	IRX4	5	1877541	1887350	ENSMMUG00000004220	IRX4	6	1842486	1847739	-1.09741	0.0375295
cg17409809	LOC728613	33007	5	1667128	-138.576	57.692	0.0430422	0.784367	ENSG00000113430	IRX4	5	1877541	1887350	ENSMMUG00000004220	IRX4	6	1842486	1847739	-1.09741	0.0375295
cg01164316	UBE2QL1	37073	5	6485810	28.0515	6.85606	0.00347839	0.577611	ENSG00000145545	SRD5A1	5	6633456	6669675	ENSMMUG00000013186	SRD5A1	6	6552037	6590796	-1.3337	0.0410879
cg07406714	TENT4A	2009	5	6712709	95.5394	34.5997	0.0246261	0.748965	ENSG00000145545	SRD5A1	5	6633456	6669675	ENSMMUG00000013186	SRD5A1	6	6552037	6590796	-1.3337	0.0410879
cg02761497	TENT4A	2278	5	6712440	16.3495	6.19379	0.0297289	0.763295	ENSG00000145545	SRD5A1	5	6633456	6669675	ENSMMUG00000013186	SRD5A1	6	6552037	6590796	-1.3337	0.0410879
cg23974739	SRD5A1	4024	5	6637525	21.918	8.34996	0.0304173	0.764969	ENSG00000145545	SRD5A1	5	6633456	6669675	ENSMMUG00000013186	SRD5A1	6	6552037	6590796	-1.3337	0.0410879
cg15739543	TENT4A	1292	5	6713426	-55.1125	23.1609	0.0445773	0.785524	ENSG00000112941	PAPD7	5	6714718	6757161	ENSMMUG00000013189	TENT4A	6	6640552	6681371	1.02503	0.0230516
cg12883486	RETREG1	16421	5	16600746	3.51147	1.4324	0.0398456	0.779136	ENSG00000173545	ZNF622	5	16451628	16465901	ENSMMUG00000055492	ZNF622	6	16686976	16702927	-0.316623	0.0355015
cg22978003	UGT3A2	710	5	36066313	5.72942	1.46003	0.00439242	0.578648	ENSG00000152620	NADK2	5	36192694	36242381	ENSMMUG00000015226	NADK2	6	35992237	36034839	-0.422646	0.0114158
cg05975079	LMBRD2	15535	5	36136480	-16.8848	5.83009	0.0200097	0.739266	ENSG00000152620	NADK2	5	36192694	36242381	ENSMMUG00000015226	NADK2	6	35992237	36034839	-0.422646	0.0114158
cg22510662	NADK2	39405	5	36202853	2.33628	0.98922	0.0458334	0.786964	ENSG00000152620	NADK2	5	36192694	36242381	ENSMMUG00000015226	NADK2	6	35992237	36034839	-0.422646	0.0114158
cg17211251	PTGER4	92642	5	40587390	-60.6571	10.8127	0.00050446	0.460957	ENSG00000171522	PTGER4	5	40679600	40693837	ENSMMUG00000016167	PTGER4	6	40540803	40554671	-2.19646	4.96e-05
cg18645276	TTC33	53	5	40756126	-155.877	43.7651	0.00738263	0.638537	ENSG00000171522	PTGER4	5	40679600	40693837	ENSMMUG00000016167	PTGER4	6	40540803	40554671	-2.19646	4.96e-05
cg24728477	PRKAA1	3	5	40798294	-114.495	45.4012	0.0357056	0.776146	ENSG00000171522	PTGER4	5	40679600	40693837	ENSMMUG00000016167	PTGER4	6	40540803	40554671	-2.19646	4.96e-05
cg05874655	PRKAA1	425	5	40798723	-22.0056	8.8108	0.0370823	0.777345	ENSG00000171522	PTGER4	5	40679600	40693837	ENSMMUG00000016167	PTGER4	6	40540803	40554671	-2.19646	4.96e-05
cg19669107	PTGER4	1688	5	40681721	-17.9758	7.1988	0.0371121	0.777345	ENSG00000171522	PTGER4	5	40679600	40693837	ENSMMUG00000016167	PTGER4	6	40540803	40554671	-2.19646	4.96e-05
cg27071460	PTGER4	1860	5	40681893	-19.8792	7.97372	0.0373421	0.777605	ENSG00000171522	PTGER4	5	40679600	40693837	ENSMMUG00000016167	PTGER4	6	40540803	40554671	-2.19646	4.96e-05
cg11134322	PRKAA1	39103	5	40759194	25.6675	10.3047	0.0374724	0.777605	ENSG00000171522	PTGER4	5	40679600	40693837	ENSMMUG00000016167	PTGER4	6	40540803	40554671	-2.19646	4.96e-05
cg03902122	CDC20B	787	5	54468218	32.825	7.90726	0.0032035	0.56545	ENSG00000145649	GZMA	5	54398476	54406080	ENSMMUG00000001597	GZMA	6	53401521	53408653	-1.38636	0.0463149
cg05005023	CDC20B	132	5	54469138	-16.6995	6.96342	0.0433	0.784844	ENSG00000145649	GZMA	5	54398476	54406080	ENSMMUG00000001597	GZMA	6	53401521	53408653	-1.38636	0.0463149
cg04075035	DHX29	641	5	54602880	-331.318	142.487	0.0485195	0.791209	ENSG00000145649	GZMA	5	54398476	54406080	ENSMMUG00000001597	GZMA	6	53401521	53408653	-1.38636	0.0463149
cg08514736	CCNO	140	5	54529368	-332.562	143.139	0.0486639	0.791209	ENSG00000145649	GZMA	5	54398476	54406080	ENSMMUG00000001597	GZMA	6	53401521	53408653	-1.38636	0.0463149
cg22127314	MTREX	314	5	54603891	18.7941	5.95569	0.0134831	0.715371	ENSG00000067113	PPAP2A	5	54720682	54830878	ENSMMUG00000030099	PLPP1	6	53734761	53839894	-0.615437	0.00669489
cg21798896	PIK3R1	40127	5	67628524	-11.4809	2.5199	0.00185947	0.529224	ENSG00000145675	PIK3R1	5	67511548	67597649	ENSMMUG00000011532	PIK3R1	6	66749629	66832327	0.754206	0.000470649
cg04080821	PIK3R1	87445	5	67675842	18.1946	6.95585	0.0308548	0.766557	ENSG00000145675	PIK3R1	5	67511548	67597649	ENSMMUG00000011532	PIK3R1	6	66749629	66832327	0.754206	0.000470649
[truncated: 2,352 more rows]

## Sheet: Table S6
Placental eQTM gene FDR significant GO Terms from STRINGdb.
[truncated: 74 more rows]
